# Supplementary material for: Extensive horizontal gene transfer in cheese-associated bacteria
Source: eLife. 2017 Jun 23;6:e22144. doi: 10.7554/eLife.22144 (PMC5526665; doi:10.7554/eLife.22144)
Supplement: Supplementary file 1. — (a) Genome statistics for newly sequenced genomes, determined by IMG/ER. Gene IDs refer to IMG bioproject or RefSeq Accession. Genomes from Almeida et. al. do not yet have accession numbers. (b) Pairwise species comparison summary total. Protein coding sequences (column ‘Shared CDS’) and nucleotides (in base-pairs - column ‘Shared nt’) determined to be horizontally transferred for every pair of species that were compared by the HGT detection pipeline. Also shows calculated ANI and 16S similarity in % (column ssu - see Materials and methods for method of determining 16S similarity). Species pairs that have ANI > 0.89 were not compared and are not shown. (c) HGT identification parameters. Different parameters for minimum length of gene match for HGT, maximum % ANI identity for related species, and maximum distance between genes in an island were compared. Number of positive HGT hits identified when varying the minimum protein coding gene length. Number of HGT groups constructed when varying the maximum separation between hits that are classified as belonging to the same group. Number of nucleotides or number of protein coding sequences in HGT regions by 16S similarity. Note - There are no results below 500 as 500 bp is the minimum length for protein coding sequences in this analysis. (d) Full group annotations. All protein coding sequences identified as HGT, sorted by group # (ranked by total nucleotide content), species and genome location within species. Certain functional annotations are identified by color (e.g. orange for iron) based on text in annotation. Locus tags and contig IDs beginning with lower case letters were assigned by kvasir, and do not correspond to any published database. (e) Group summary statistics. Summary statistics for each HGT group. (f) Highly conserved genes in Brevibacterium species. Protein coding sequences from Group 29, as well as selected highly conserved genes from Brevibacterium antiquum CNRZ918 were compared with other Brevibacteri [file elife-22144-supp1.xlsx]

## Sheet: Supplementary file 1a
	Genome Name / Sample Name	Accession	IMG Genome ID	Genome Size	Scaffold Count	Gene Count	GC %	CDS Count	RNA Count	tRNA Count	w/ Func Pred %	Country of Production	State/Region	Cheese style	Milk type	Cheese ID (isolation source, from Wolfe et al, Cell, 2014)
Newly Sequenced Genomes	Brachybacterium alimentarium 341_9	SAMN07141157	2657245372	4263086	70	3770	0.7	3707	63	51	78.81	Spain	Canary Islands	Natural rind	Goat	CSB343
	Brachybacterium alimentarium 738_10	SAMN07141158	2657245373	4160958	74	3700	0.7	3639	61	52	78.35	USA	Maine	Washed rind	Cow and Goat	CSB738
	Brachybacterium alimentarium 862_8	SAMN07141159	2657245374	4076323	95	3618	0.7	3559	59	51	79.08	USA	Vermont	Washed rind	Cow	CSB862
	Brachybacterium alimentarium 876_9	SAMN07141160	2657245375	3986667	81	3510	0.7	3449	61	51	80.43	France	Pyrenees	Washed rind	Sheep	CSB876
	Brachybacterium alimentarium 900_8	SAMN07141161	2657245376	4069999	62	3589	0.7	3527	62	50	79.74	France	Pyrenees	Natural rind	Sheep	CSB900
	Brachybacterium alimentarium 908_11	SAMN07141162	2657245377	3982721	67	3510	0.7	3449	61	50	80.83	France	Aquitaine	Natural rind	Sheep	CSB908
	Brachybacterium alimentarium 947_11	SAMN07141163	2657245378	4061913	71	3583	0.7	3522	61	50	80.18	USA	Massachusetts	Natural rind	Cow	CSB947
	Brachybacterium alimentarium 962_10	SAMN07141164	2657245379	3988882	80	3526	0.7	3465	61	50	80.49	USA	Oregon	Natural rind	Goat	CSB962
	Brachybacterium sp. JB7	SAMN07141172	2639762592	4077854	74	3629	0.7	3559	70	50	80.08	USA	Vermont	Natural rind	Cow	CSB491
	Brevibacterium linens 341_13	SAMN07141149	2657245380	3875658	45	3603	0.63	3543	60	49	77.1	Spain	Canary Islands	Natural rind	Goat	CSB343
	Brevibacterium linens 738_8	SAMN07141150	2657245381	4128221	56	3828	0.63	3767	61	49	77.09	USA	Maine	Washed rind	Cow and Goat	CSB738
	Brevibacterium linens 862_7	SAMN07141151	2657245382	4058499	103	3802	0.63	3741	61	49	75.78	USA	Vermont	Washed rind	Cow	CSB862
	Brevibacterium linens 876_7	SAMN07141152	2657245383	4107136	52	3826	0.63	3765	61	49	76.35	France	Pyrenees	Washed rind	Sheep	CSB876
	Brevibacterium linens 900_6	SAMN07141153	2657245384	4029828	58	3718	0.63	3658	60	49	77.89	France	Pyrenees	Natural rind	Sheep	CSB900
	Brevibacterium linens 908_7	SAMN07141154	2657245385	3994519	59	3738	0.63	3679	59	49	76.83	France	Aquitaine	Natural rind	Sheep	CSB908
	Brevibacterium linens 947_7	SAMN07141155	2657245386	4099087	58	3792	0.63	3732	60	49	76.87	USA	Massachusetts	Natural rind	Cow	CSB947
	Brevibacterium linens 962_8	SAMN07141156	2657245387	4182269	68	3861	0.63	3801	60	49	76.9	USA	Oregon	Natural rind	Goat	CSB962
	Brevibacterium linens JB5	SAMN07141170	2639762593	4310614	1	3964	0.63	3893	71	49	76.24	USA	Vermont	Natural rind	Cow	CSB491
	Corynebacterium sp. JB4	SAMN07141176	2639762594	3039007	3	2864	0.55	2791	73	52	74.06	USA	Vermont	Natural rind	Cow	CSB491
	Glutamicibacter sp. BW77	SAMN07141165	2657245388	3902028	90	3792	0.57	3713	79	62	72.6	Italy	Tuscany	Natural rind	Sheep	CSB443
	Glutamicibacter sp. BW78	SAMN07141166	2657245389	3419483	43	3227	0.64	3167	60	50	76.88	France	Auvergne	Natural rind	Cow	CSB705
	Glutamicibacter sp. BW80	SAMN07141167	2657245371	4049569	78	3886	0.6	3808	78	64	74.68	France	Auvergne	Bloomy rind	Cow	CSB238
	Glutamicibacter sp. JB182	SAMN07141175	2639762591	3947886	12	3929	0.59	3835	94	64	71.04	USA	Vermont	Washed rind	Cow	not included in Wolfe et al.
	Halomonas sp JB37	SAMN07141169	2639762595	3808244	2	3577	0.54	3493	84	59	83.56	USA	Vermont	Natural rind	Cow	CSB491
	Microbacterium sp. JB110	SAMN07141168	2639762596	3787992	35	3493	0.68	3434	59	47	80.33	USA	Vermont	Natural rind	Goat	CSB894
	Pseudoalteromonas sp. JB197	SAMN07141177	2639762597	4161601	12	3866	0.4	3707	159	102	75.92	USA	Vermont	Washed rind	Cow	CSB557
	Psychrobacter sp. JB193	SAMN07141171	2639762598	3476598	10	3098	0.43	3014	84	51	75.15	USA	Vermont	Washed rind	Cow	not included in Wolfe et al.
	Sphingobacterium sp. JB170	SAMN07141173	2639762599	4483800	4	4045	0.42	3952	93	63	70.43	USA	Vermont	Natural rind	Goat	CSB894
	Vibrio casei JB196	SAMN07141174	2639762600	3987958	30	3742	0.41	3604	138	94	80.04	USA	Vermont	Washed rind	Cow	CSB557
NCBI RefSeq Genomes	Thermus thermophilus HB8	NC_006461.1
	Brevibacterium linens BL2	NZ_AAGP01000076.1
	Corynebacterium variabile DSM 44702	NC_015859.1
	Corynebacterium casei LMG S 19264	NZ_CP004351.1
	Glutamicibacter arilaitensis Re117	NC_014550.1
	Corynebacterium casei UCMA 3821	NZ_CAFW01000106.1
	Microbacterium gubbeenense DSM 15944	NZ_AUGQ01000001.1
	Listeria fleischmannii subsp fleischmannii LU2006 1	GI:459197469
	Listeria monocytogenes str Scott A	GI:332188985
	Listeria monocytogenes serotype 4bV str LS542	GI:542043440
	Lactobacillus casei ATCC 334	NC_008526.1
	Lactobacillus brevis ATCC 367	NC_008497.1
Almeida et. al.	Acinetobacter genospecies 3 PCAiE6 10
	Acinetobacter johnsonii 3M05
	Advenella kashmirensis 3T5F
	Agrococcus casei LMG22410
	Alcaligenes faecalis 2L10
	Alcaligenes sp 2L29
	Alkalibacterium kapii FAM208 38
	Bacillus altitudinis 263
	Bacillus fordii CIP 108821
	Bacillus galactosidilyticus CIP 108417
	Bacillus pumilus M21
	Bavariicoccus seileri ws4188
	Brachybacterium alimentarium CNRZ925
	Brevibacillus parabrevis CIP 110335
	Brevibacterium antiquum CNRZ918
	Brevibacterium casei CIP 102111
	Brevibacterium casei S18
	Brevibacterium iodinum ATCC 49514
	Brevibacterium linens ATCC 9172
	Brevundimonas diminuta 3F5N
	Brochothrix thermosphacta cH814
	Carnobacterium maltaromaticum 38b
	Chryseobacterium bovis Pi18
	Chryseobacterium ginsengisoli M17
	Chryseobacterium joostei PCAiD6 3
	Chryseobacterium shigense PCAiB2 3
	Chryseobacterium vrystaatense PCAIF2 7
	Citrobacter freundii Pi15
	Citrococcus sp ws2216
	Comamonas testosteroni NL2512
	Corynebacterium ammoniagenes ws2211
	Corynebacterium flavescens Mu128
	Corynebacterium stationis CRBM6
	Corynebacterium variabile
	Delftia acidovorans PCA12
	Enterobacter amnigenus CV9
	Enterococcus durans LMG10746
	Enterococcus hirae SB10
	Enterococcus malodoratus FAM208 55
	Enterococcus saccharominimus M17 423
	Exiguobacterium acetylicum 180
	Exiguobacterium sibiricum NL255
	Facklamia tabacinasalis FAM208 56
	Glutamicibacter arilaitensis 3M03
	Glutamicibacter arilaitensis Ca106
	Glutamicibacter arilaitensis GMPA29
	Halomonas sp 1M45
	Halomonas venusta 3A7M
	Halomonas venusta 3D7M
	Halomonas venusta 3F2F
	Jeotgalicoccus psychrophilus CRBMD21
	Klebsiella oxytoca Pi20
	Kluyvera intermedia TL336A
	Kocuria carniphila CRBM38
	Kocuria varians Mu208
	Lactobacillus brevis KB290
	Lactobacillus casei BD II
	Lactobacillus crustorum FH4
	Lactococcus garvieae N201
	Lactococcus plantarum NCDO 1869
	Lactococcus raffinolactis NCDO617
	Leucobacter komagatae 1L36
	Leucobacter sp ER15 166 BHI15
	Leuconostoc citreum MSE2
	Leuconostoc mesenteroides CNRZ1283
	Leuconostoc pseudomesenteroides MSE7
	Luteococcus japonicus LSP Lj1
	Macrococcus caseolyticus ATCC 13458
	Microbacterium oxydans PCA1
	Microbacterium sp JB110
	Micrococcus luteus Mu201
	Morganella morganii subsp siboni 3A5A
	Morganella psychrotolerans 925
	Mycobacterium vaccae CIP 105934
	Ornithinibacillus bavariensis CIP 109287
	Paenibacillus lactis CIP 108827
	Paenibacillus sp 3M17
	Pantoea agglomerans PCAiQ6 3
	Pediococcus parvulus CIRM750
	Propionibacterium acidipropinicii LSPAc1
	Propionibacterium freudenreichii subsp shermanii CIRM BIA1
	Propionibacterium thoenii LSPTH1
	Proteus hauseri 1M10
	Proteus vulgaris 1M25
	Providencia alcalifaciens GM3
	Providencia heimbachae GR4
	Providencia rettgeri 947
	Pseudoalteromonas sp JB197
	Pseudomonas fluorescens PCAiD6 2
	Pseudomonas fragi 1E26
	Pseudomonas lundensis PCAiD2 2
	Pseudomonas pseudojaponica PCAi6 5
	Pseudomonas psychrophila 1E44
	Psychrobacter aquimaris ER15 174 BHI7
	Psychrobacter celer 91
	Psychrobacter faecalis H5
	Psychrobacter immobilis PG1
	Psychrobacter namhaensis 1439
	Psychrobacter sp JB193
	Raoultella ornithinolytica TL332
	Raoultella planticola 3M45
	Rothia mucilaginosa M1710
	Serratia marescens 448
	Serratia proteamaculans 1C2F
	Serratia rubidaea TA 26
	Sphingobacterium faecium PCAiF2 5
	Sphingobacterium sp JB170
	Staphylococcus caprae DSM 20608
	Staphylococcus fleuretti CIP106114
	Staphylococcus lentus Ca2
	Staphylococcus vitulinus Ma1
	Staphylococcus warneri 1445
	Staphylococcus xylosus
	Stenotrophomonas indologenes PCAi2 2
	Stenotrophomonas maltophilia Pi1
	Stenotrophomonas rhizophila PCA13
	Streptococcus infantarius 11FA
	Streptococcus infantarius subsp infantarius 3AG
	Streptococcus macedonicus 679
	Streptococcus salivarius CJ181
	Vagococcus fluvialis bH819
	Vagococcus lutrae FAM208
	Vibrio casei ws4539
	Vibrio litoralis B4
	Weissella cibaria 3385
	Weissella cibaria 3386

## Sheet: Supplementary file 1b
Species 1	Phylum 2	Species 2	Phylum 2	Shared CDS	Shared nt (bp)	ANI	SSU identity (%)
Brevibacterium linens BL2	Actinobacteria	Brevibacterium antiquum CNRZ918	Actinobacteria	194	229890	0.88571	96.591
Brevibacterium linens 876.7	Actinobacteria	Brevibacterium antiquum CNRZ918	Actinobacteria	162	186210	0.883491	96.457
Brevibacterium antiquum CNRZ918	Actinobacteria	Brevibacterium linens 962.8	Actinobacteria	173	197698	0.883387	96.658
Brevibacterium antiquum CNRZ918	Actinobacteria	Brevibacterium linens 738.8	Actinobacteria	158	185816	0.88328	96.591
Brevibacterium antiquum CNRZ918	Actinobacteria	Brevibacterium linens 862.7	Actinobacteria	162	184604	0.882829	96.591
Brevibacterium linens JB5	Actinobacteria	Brevibacterium antiquum CNRZ918	Actinobacteria	155	189985	0.882711	96.658
Brevibacterium linens 908.7	Actinobacteria	Brevibacterium antiquum CNRZ918	Actinobacteria	158	180738	0.881754	96.591
Brevibacterium linens 341.13	Actinobacteria	Brevibacterium antiquum CNRZ918	Actinobacteria	160	181848	0.880944	96.725
Brevibacterium linens 947.7	Actinobacteria	Brevibacterium antiquum CNRZ918	Actinobacteria	151	172600	0.880458	96.591
Brevibacterium antiquum CNRZ918	Actinobacteria	Brevibacterium linens 900.6	Actinobacteria	120	128316	0.878465	96.591
Bacillus altitudinis 263	Firmicutes	Bacillus pumilus M21	Firmicutes	2	1197	0.877769	97.9
Staphylococcus fleuretti CIP106114	Firmicutes	Staphylococcus vitulinus Ma1	Firmicutes	25	28065	0.87183	98.96
Stenotrophomonas indologenes PCAi2.2	g-Proteobacteria	Stenotrophomonas maltophilia Pi1	g-Proteobacteria	0	0	0.868625	93.482
Vibrio casei ws4539	g-Proteobacteria	Vibrio litoralis B4	g-Proteobacteria	93	115294	0.863066	97.584
Lactobacillus crustorum FH4	Firmicutes	Lactobacillus casei ATCC 334 (Lactobacillus paracasei ATCC 334)	Firmicutes	30	30402	0.857302	84.712
Chryseobacterium vrystaatense PCAIF2.7	g-Proteobacteria	Chryseobacterium shigense PCAiB2.3	g-Proteobacteria	0	0	0.856234	97.846
Stenotrophomonas rhizophila PCA13	g-Proteobacteria	Stenotrophomonas maltophilia Pi1	g-Proteobacteria	0	0	0.85547	94.969
Vibrio casei JB196	g-Proteobacteria	Vibrio litoralis B4	g-Proteobacteria	52	80040	0.8523	97.843
Streptococcus infantarius subsp. infantarius 3AG	Firmicutes	Streptococcus macedonicus 679	Firmicutes	19	20071	0.851903	97.188
Brevibacterium linens BL2	Actinobacteria	Brevibacterium linens ATCC 9172	Actinobacteria	0	0	0.849765	93.267
Alcaligenes sp. 2L29	g-Proteobacteria	Alcaligenes faecalis 2L10	g-Proteobacteria	0	0	0.849152	99.412
Streptococcus macedonicus 679	Firmicutes	Streptococcus infantarius 11FA	Firmicutes	18	21367	0.848779	97.427
Glutamicibacter bergerei BW77	Actinobacteria	Glutamicibacter sp. BW80	Actinobacteria	106	129612	0.848427	99.479
Propionibacterium acidipropinicii LSPAc1	Actinobacteria	Propionibacterium thoenii LSPTH1	Actinobacteria	2	1317	0.844018	91.489
Pseudomonas fragi 1E26	g-Proteobacteria	Pseudomonas psychrophila 1E44	g-Proteobacteria	1	687	0.841272	98.795
Leuconostoc citreum MSE2	Firmicutes	Leuconostoc mesenteroides CNRZ1283	Firmicutes	10	8235	0.840459	90.592
Serratia marescens 448	g-Proteobacteria	Serratia proteamaculans 1C2F	g-Proteobacteria	0	0	0.839534	96.593
Brevibacterium antiquum CNRZ918	Actinobacteria	Brevibacterium linens ATCC 9172	Actinobacteria	34	43332	0.838877	95.238
Pseudomonas fragi 1E26	g-Proteobacteria	Pseudomonas lundensis PCAiD2.2	g-Proteobacteria	0	0	0.837298	98.718
Pseudomonas lundensis PCAiD2.2	g-Proteobacteria	Pseudomonas psychrophila 1E44	g-Proteobacteria	2	3612	0.835348	98.397
Serratia marescens 448	g-Proteobacteria	Serratia rubidaea TA 26	g-Proteobacteria	0	0	0.834579	91.982
Corynebacterium casei UCMA 3821	Actinobacteria	Corynebacterium stationis CRBM6	Actinobacteria	8	10505	0.833669	85.402
Corynebacterium casei LMG S-19264	Actinobacteria	Corynebacterium stationis CRBM6	Actinobacteria	7	8751	0.833265	85.402
Glutamicibacter sp. BW80	Actinobacteria	Glutamicibacter arilaitensis Ca106	Actinobacteria	62	65837	0.833062	95.925
Proteus vulgaris 1M25	g-Proteobacteria	Proteus hauseri 1M10	g-Proteobacteria	1	1167	0.832738	98.086
Glutamicibacter bergerei BW77	Actinobacteria	Glutamicibacter arilaitensis JB182	Actinobacteria	66	67547	0.832719	98.242
Corynebacterium ammoniagenes ws2211	Actinobacteria	Corynebacterium stationis CRBM6	Actinobacteria	9	9781	0.832633	81.519
Chryseobacterium joostei PCAiD6.3	g-Proteobacteria	Chryseobacterium ginsengisoli M17	g-Proteobacteria	0	0	0.832157	95.498
Corynebacterium casei JB4	Actinobacteria	Corynebacterium stationis CRBM6	Actinobacteria	5	8553	0.831702	85.402
Glutamicibacter bergerei BW77	Actinobacteria	Glutamicibacter arilaitensis Re117	Actinobacteria	53	57773	0.830019	98.223
Brevibacterium iodinum ATCC 49514	Actinobacteria	Brevibacterium casei CIP 102111	Actinobacteria	0	0	0.829956	94.433
Brevibacterium linens 341.13	Actinobacteria	Brevibacterium linens ATCC 9172	Actinobacteria	0	0	0.829946	93.267
Pseudomonas fluorescens PCAiD6.2	g-Proteobacteria	Pseudomonas lundensis PCAiD2.2	g-Proteobacteria	52	61615	0.829945	95.611
Brevibacterium linens 862.7	Actinobacteria	Brevibacterium linens ATCC 9172	Actinobacteria	0	0	0.829164	93.267
Glutamicibacter bergerei BW77	Actinobacteria	Glutamicibacter arilaitensis 3M03	Actinobacteria	37	36125	0.827941	95.705
Brevibacterium linens 341.13	Actinobacteria	Brevibacterium iodinum ATCC 49514	Actinobacteria	7	5655	0.827522	92.227
Morganella morganii subsp. siboni 3A5A	g-Proteobacteria	Morganella psychrotolerans 925	g-Proteobacteria	0	0	0.827195	98.253
Brevibacterium linens ATCC 9172	Actinobacteria	Brevibacterium casei CIP 102111	Actinobacteria	0	0	0.826995	93.272
Psychrobacter aquimaris ER15 174 BHI7	g-Proteobacteria	Psychrobacter faecalis H5	g-Proteobacteria	16	20356	0.826962	96.856
Pseudomonas fluorescens PCAiD6.2	g-Proteobacteria	Pseudomonas pseudojaponica PCAi6.5	g-Proteobacteria	0	0	0.826586	92.116
Brevibacterium linens 962.8	Actinobacteria	Brevibacterium linens ATCC 9172	Actinobacteria	0	0	0.82652	93.267
Streptococcus infantarius subsp. infantarius 3AG	Firmicutes	Streptococcus salivarius CJ181	Firmicutes	1	1299	0.826373	96.485
Brevibacterium linens 908.7	Actinobacteria	Brevibacterium linens ATCC 9172	Actinobacteria	0	0	0.826315	93.267
Glutamicibacter sp. BW80	Actinobacteria	Glutamicibacter arilaitensis JB182	Actinobacteria	46	47557	0.826305	98.698
Glutamicibacter sp. BW80	Actinobacteria	Glutamicibacter arilaitensis Re117	Actinobacteria	38	40631	0.826119	98.683
Psychrobacter faecalis H5	g-Proteobacteria	Psychrobacter immobilis PG1	g-Proteobacteria	5	6411	0.825735	97.944
Brevibacterium linens ATCC 9172	Actinobacteria	Brevibacterium linens 738.8	Actinobacteria	0	0	0.825703	93.267
Brevibacterium linens 947.7	Actinobacteria	Brevibacterium linens ATCC 9172	Actinobacteria	0	0	0.825656	93.267
Brevibacterium linens JB5	Actinobacteria	Brevibacterium linens ATCC 9172	Actinobacteria	0	0	0.825329	93.267
Psychrobacter aquimaris ER15 174 BHI7	g-Proteobacteria	Psychrobacter sp JB193	g-Proteobacteria	33	33860	0.825012	97.216
Glutamicibacter sp. BW80	Actinobacteria	Glutamicibacter arilaitensis 3M03	Actinobacteria	28	29765	0.824833	95.925
Brevibacterium linens 876.7	Actinobacteria	Brevibacterium linens ATCC 9172	Actinobacteria	0	0	0.824598	93.168
Brevibacterium linens BL2	Actinobacteria	Brevibacterium iodinum ATCC 49514	Actinobacteria	5	5408	0.824412	92.227
Glutamicibacter arilaitensis Ca106	Actinobacteria	Glutamicibacter arilaitensis JB182	Actinobacteria	0	0	0.824109	97.137
Brevibacterium linens ATCC 9172	Actinobacteria	Brevibacterium linens 900.6	Actinobacteria	0	0	0.824098	93.267
Glutamicibacter arilaitensis Ca106	Actinobacteria	Glutamicibacter arilaitensis Re117	Actinobacteria	0	0	0.824037	97.137
Glutamicibacter arilaitensis Ca106	Actinobacteria	Glutamicibacter arilaitensis 3M03	Actinobacteria	0	0	0.823966	100
Streptococcus infantarius 11FA	Firmicutes	Streptococcus salivarius CJ181	Firmicutes	0	0	0.823044	96.655
Brevibacterium linens JB5	Actinobacteria	Brevibacterium iodinum ATCC 49514	Actinobacteria	6	4041	0.822185	92.227
Psychrobacter celer 91	g-Proteobacteria	Psychrobacter faecalis H5	g-Proteobacteria	5	6984	0.822	96.735
Brevibacterium linens 908.7	Actinobacteria	Brevibacterium iodinum ATCC 49514	Actinobacteria	5	3366	0.821618	92.227
Glutamicibacter bergerei BW77	Actinobacteria	Glutamicibacter arilaitensis GMPA29	Actinobacteria	28	26091	0.821577	94.21
Brevibacterium iodinum ATCC 49514	Actinobacteria	Brevibacterium linens 738.8	Actinobacteria	4	2754	0.821095	92.227
Brevibacterium linens 876.7	Actinobacteria	Brevibacterium iodinum ATCC 49514	Actinobacteria	2	1596	0.820937	92.227
Brevibacterium linens 862.7	Actinobacteria	Brevibacterium iodinum ATCC 49514	Actinobacteria	3	2166	0.820825	92.227
Brevibacterium linens 947.7	Actinobacteria	Brevibacterium iodinum ATCC 49514	Actinobacteria	6	4446	0.820674	92.227
Glutamicibacter sp. BW80	Actinobacteria	Glutamicibacter arilaitensis GMPA29	Actinobacteria	22	22840	0.820595	94.366
Glutamicibacter arilaitensis Ca106	Actinobacteria	Glutamicibacter arilaitensis GMPA29	Actinobacteria	0	0	0.820479	100
Serratia proteamaculans 1C2F	g-Proteobacteria	Serratia rubidaea TA 26	g-Proteobacteria	4	4905	0.820198	93.404
Brevibacterium iodinum ATCC 49514	Actinobacteria	Brevibacterium linens 900.6	Actinobacteria	6	4125	0.82011	92.227
Brevibacterium linens 341.13	Actinobacteria	Brevibacterium casei CIP 102111	Actinobacteria	0	0	0.819012	93.414
Brevibacterium linens 962.8	Actinobacteria	Brevibacterium iodinum ATCC 49514	Actinobacteria	4	2973	0.818928	92.227
Brevibacterium linens 862.7	Actinobacteria	Brevibacterium casei CIP 102111	Actinobacteria	0	0	0.818918	93.313
Brevibacterium linens 947.7	Actinobacteria	Brevibacterium casei CIP 102111	Actinobacteria	0	0	0.818892	93.313
Psychrobacter sp JB193	g-Proteobacteria	Psychrobacter namhaensis 1439	g-Proteobacteria	4	3765	0.818892	99.297
Psychrobacter immobilis PG1	g-Proteobacteria	Psychrobacter sp JB193	g-Proteobacteria	17	20354	0.818881	98.358
Leuconostoc pseudomesenteroides MSE7	Firmicutes	Leuconostoc mesenteroides CNRZ1283	Firmicutes	3	3831	0.81859	95.962
Psychrobacter aquimaris ER15 174 BHI7	g-Proteobacteria	Psychrobacter namhaensis 1439	g-Proteobacteria	1	699	0.818533	97.538
Brevibacterium linens 876.7	Actinobacteria	Brevibacterium casei CIP 102111	Actinobacteria	0	0	0.818292	93.313
Providencia heimbachae GR4	g-Proteobacteria	Providencia alcalifaciens GM3	g-Proteobacteria	5	5946	0.818003	98.818
Brevibacterium casei CIP 102111	Actinobacteria	Brevibacterium linens 900.6	Actinobacteria	0	0	0.817916	93.313
Brevibacterium casei S18	Actinobacteria	Brevibacterium linens ATCC 9172	Actinobacteria	0	0	0.817482	96.785
Brevibacterium linens BL2	Actinobacteria	Brevibacterium casei CIP 102111	Actinobacteria	0	0	0.817438	93.313
Brevibacterium linens 962.8	Actinobacteria	Brevibacterium casei CIP 102111	Actinobacteria	0	0	0.817219	93.414
Pseudomonas fluorescens PCAiD6.2	g-Proteobacteria	Pseudomonas fragi 1E26	g-Proteobacteria	0	0	0.817169	95.722
Brevibacterium linens JB5	Actinobacteria	Brevibacterium casei CIP 102111	Actinobacteria	0	0	0.817166	93.313
Brevibacterium linens 908.7	Actinobacteria	Brevibacterium casei CIP 102111	Actinobacteria	0	0	0.817005	93.313
Psychrobacter immobilis PG1	g-Proteobacteria	Psychrobacter namhaensis 1439	g-Proteobacteria	0	0	0.816751	98.476
Pseudomonas fragi 1E26	g-Proteobacteria	Pseudomonas pseudojaponica PCAi6.5	g-Proteobacteria	0	0	0.816632	95.448
Brevibacterium iodinum ATCC 49514	Actinobacteria	Brevibacterium casei S18	Actinobacteria	0	0	0.816106	97.505
Brevibacterium casei CIP 102111	Actinobacteria	Brevibacterium linens 738.8	Actinobacteria	0	0	0.816031	93.313
Brevibacterium antiquum CNRZ918	Actinobacteria	Brevibacterium casei CIP 102111	Actinobacteria	0	0	0.815765	93.503
Brevibacterium antiquum CNRZ918	Actinobacteria	Brevibacterium iodinum ATCC 49514	Actinobacteria	4	2754	0.815572	92.972
Leuconostoc pseudomesenteroides MSE7	Firmicutes	Leuconostoc citreum MSE2	Firmicutes	0	0	0.815534	88.778
Pseudomonas pseudojaponica PCAi6.5	g-Proteobacteria	Pseudomonas psychrophila 1E44	g-Proteobacteria	0	0	0.815046	95.85
Pseudomonas fluorescens PCAiD6.2	g-Proteobacteria	Pseudomonas psychrophila 1E44	g-Proteobacteria	0	0	0.814957	96.658
Bacillus fordii CIP 108821	Firmicutes	Bacillus galactosidilyticus CIP 108417	Firmicutes	4	4176	0.814296	92.593
Chryseobacterium shigense PCAiB2.3	g-Proteobacteria	Chryseobacterium bovis Pi18	g-Proteobacteria	2	1443	0.813977	95.769
Staphylococcus lentus Ca2	Firmicutes	Staphylococcus fleuretti CIP106114	Firmicutes	3	2353	0.813931	99.133
Psychrobacter aquimaris ER15 174 BHI7	g-Proteobacteria	Psychrobacter celer 91	g-Proteobacteria	10	8613	0.813558	95.592
Pseudomonas pseudojaponica PCAi6.5	g-Proteobacteria	Pseudomonas lundensis PCAiD2.2	g-Proteobacteria	0	0	0.813349	91.571
Psychrobacter faecalis H5	g-Proteobacteria	Psychrobacter sp JB193	g-Proteobacteria	3	3486	0.81323	98.791
Staphylococcus lentus Ca2	Firmicutes	Staphylococcus vitulinus Ma1	Firmicutes	1	587	0.813183	99.611
Enterococcus malodoratus FAM208 55	Firmicutes	Enterococcus durans LMG10746	Firmicutes	6	4530	0.811847	99.011
Staphylococcus equorum BC15	Firmicutes	Staphylococcus equorum BC9	Firmicutes	0	0	0.811303	98.91
Lactococcus plantarum NCDO 1869	Firmicutes	Lactococcus raffinolactis NCDO617	Firmicutes	3	3603	0.811272	100
Halomonas sp. 1M45	g-Proteobacteria	Halomonas venusta 3A7M	g-Proteobacteria	28	27669	0.810261	96.503
Chryseobacterium joostei PCAiD6.3	g-Proteobacteria	Chryseobacterium shigense PCAiB2.3	g-Proteobacteria	4	3648	0.809636	98.35
Streptococcus macedonicus 679	Firmicutes	Streptococcus salivarius CJ181	Firmicutes	0	0	0.809377	94.366
Kocuria carniphila CRBM38	Actinobacteria	Kocuria varians Mu208	Actinobacteria	0	0	0.808783	93.122
Chryseobacterium ginsengisoli M17	g-Proteobacteria	Chryseobacterium vrystaatense PCAIF2.7	g-Proteobacteria	0	0	0.808749	91.9
Psychrobacter faecalis H5	g-Proteobacteria	Psychrobacter namhaensis 1439	g-Proteobacteria	1	891	0.80857	98.67
Psychrobacter celer 91	g-Proteobacteria	Psychrobacter sp JB193	g-Proteobacteria	4	3651	0.808489	97.839
Chryseobacterium ginsengisoli M17	g-Proteobacteria	Chryseobacterium shigense PCAiB2.3	g-Proteobacteria	0	0	0.808375	94.65
Psychrobacter celer 91	g-Proteobacteria	Psychrobacter immobilis PG1	g-Proteobacteria	0	0	0.808252	96.975
Staphylococcus caprae DSM 20608	Firmicutes	Staphylococcus warneri 1445	Firmicutes	0	0	0.807961	95.325
Halomonas sp. 1M45	g-Proteobacteria	Halomonas sp JB37	g-Proteobacteria	15	16307	0.807344	96.831
Psychrobacter celer 91	g-Proteobacteria	Psychrobacter namhaensis 1439	g-Proteobacteria	1	699	0.807171	97.069
Chryseobacterium joostei PCAiD6.3	g-Proteobacteria	Chryseobacterium vrystaatense PCAIF2.7	g-Proteobacteria	0	0	0.806514	98.154
Microbacterium sp. JB110	Actinobacteria	Microbacterium gubbeenense DSM 15944	Actinobacteria	14	19674	0.806468	93.437
Exiguobacterium acetylicum 180	Firmicutes	Exiguobacterium sibiricum NL255	Firmicutes	11	10422	0.806278	96.057
Halomonas sp. 1M45	g-Proteobacteria	Halomonas venusta 3F2F	g-Proteobacteria	17	17689	0.805816	96.763
Sphingobacterium faecium PCAiF2.5	g-Proteobacteria	Sphingobacterium sp JB170	g-Proteobacteria	0	0	0.805233	91.569
Enterococcus saccharominimus M17 423	Firmicutes	Enterococcus malodoratus FAM208 55	Firmicutes	3	2454	0.80485	96.197
Halomonas sp. 1M45	g-Proteobacteria	Halomonas venusta 3D7M	g-Proteobacteria	22	22036	0.804553	96.503
Providencia alcalifaciens GM3	g-Proteobacteria	Providencia rettgeri 947	g-Proteobacteria	0	0	0.802505	98.966
Providencia heimbachae GR4	g-Proteobacteria	Providencia rettgeri 947	g-Proteobacteria	0	0	0.802487	98.862
Brevibacterium casei S18	Actinobacteria	Brevibacterium linens 738.8	Actinobacteria	0	0	0.8023	96.381
Brevibacterium linens 947.7	Actinobacteria	Brevibacterium casei S18	Actinobacteria	0	0	0.802144	96.381
Brevibacterium linens BL2	Actinobacteria	Brevibacterium casei S18	Actinobacteria	0	0	0.802134	96.381
Brevibacterium linens 862.7	Actinobacteria	Brevibacterium casei S18	Actinobacteria	0	0	0.802054	96.381
Brevibacterium linens 341.13	Actinobacteria	Brevibacterium casei S18	Actinobacteria	0	0	0.801773	96.381
Brevibacterium linens 962.8	Actinobacteria	Brevibacterium casei S18	Actinobacteria	0	0	0.801686	96.455
Brevibacterium linens 876.7	Actinobacteria	Brevibacterium casei S18	Actinobacteria	0	0	0.801447	96.381
Brevibacterium casei S18	Actinobacteria	Brevibacterium linens 900.6	Actinobacteria	0	0	0.801435	96.381
Brevibacterium linens JB5	Actinobacteria	Brevibacterium casei S18	Actinobacteria	0	0	0.800988	96.307
Brevibacterium linens 908.7	Actinobacteria	Brevibacterium casei S18	Actinobacteria	0	0	0.800921	96.381
Microbacterium oxydans PCA1	Actinobacteria	Microbacterium gubbeenense DSM 15944	Actinobacteria	0	0	0.799115	87
Brevibacterium antiquum CNRZ918	Actinobacteria	Brevibacterium casei S18	Actinobacteria	0	0	0.798982	96.11
Acinetobacter genospecies 3 PCAiE6.10	g-Proteobacteria	Acinetobacter johnsonii 3M05	g-Proteobacteria	1	2667	0.796845	97.969
Microbacterium sp. JB110	Actinobacteria	Microbacterium oxydans PCA1	Actinobacteria	0	0	0.795935	89.862
Halomonas sp JB37	g-Proteobacteria	Halomonas venusta 3F2F	g-Proteobacteria	6	7152	0.792792	96.416
Staphylococcus equorum BC15	Firmicutes	Staphylococcus warneri 1445	Firmicutes	0	0	0.791915	94.792
Staphylococcus warneri 1445	Firmicutes	Staphylococcus equorum BC9	Firmicutes	0	0	0.790675	94.995
Enterococcus hirae SB10	Firmicutes	Enterococcus durans LMG10746	Firmicutes	0	0	0.788464	96.217
Halomonas venusta 3D7M	g-Proteobacteria	Halomonas sp JB37	g-Proteobacteria	5	4438	0.788284	96.721
Enterococcus saccharominimus M17 423	Firmicutes	Enterococcus durans LMG10746	Firmicutes	0	0	0.788177	96.649
Halomonas venusta 3A7M	g-Proteobacteria	Halomonas sp JB37	g-Proteobacteria	3	2146	0.787836	96.721
Staphylococcus warneri 1445	Firmicutes	Staphylococcus vitulinus Ma1	Firmicutes	1	675	0.787708	96.302
Staphylococcus fleuretti CIP106114	Firmicutes	Staphylococcus equorum BC9	Firmicutes	9	8271	0.786187	96.707
Enterococcus malodoratus FAM208 55	Firmicutes	Enterococcus hirae SB10	Firmicutes	0	0	0.785988	96.248
Glutamicibacter sp. BW80	Actinobacteria	Glutamicibacter sp. BW78	Actinobacteria	0	0	0.785976	94.675
Enterococcus saccharominimus M17 423	Firmicutes	Enterococcus hirae SB10	Firmicutes	0	0	0.785933	93.345
Corynebacterium casei LMG S-19264	Actinobacteria	Corynebacterium flavescens Mu128	Actinobacteria	4	6415	0.785856	92.418
Staphylococcus equorum BC15	Firmicutes	Staphylococcus caprae DSM 20608	Firmicutes	0	0	0.78531	97.343
Corynebacterium flavescens Mu128	Actinobacteria	Corynebacterium casei UCMA 3821	Actinobacteria	5	5618	0.785184	92.418
Chryseobacterium ginsengisoli M17	g-Proteobacteria	Chryseobacterium bovis Pi18	g-Proteobacteria	0	0	0.784391	92.108
Corynebacterium flavescens Mu128	Actinobacteria	Corynebacterium casei JB4	Actinobacteria	3	3466	0.784063	92.418
Chryseobacterium joostei PCAiD6.3	g-Proteobacteria	Chryseobacterium bovis Pi18	g-Proteobacteria	0	0	0.783908	95.337
Glutamicibacter bergerei BW77	Actinobacteria	Glutamicibacter sp. BW78	Actinobacteria	3	3810	0.78229	94.545
Corynebacterium ammoniagenes ws2211	Actinobacteria	Corynebacterium flavescens Mu128	Actinobacteria	4	4540	0.78227	94.82
Staphylococcus caprae DSM 20608	Firmicutes	Staphylococcus equorum BC9	Firmicutes	0	0	0.781678	97.182
Listeria fleischmannii subsp. fleischmannii LU2006-1	Firmicutes	Listeria monocytogenes str. Scott A	Firmicutes	0	0	0.779405	95.073
Corynebacterium flavescens Mu128	Actinobacteria	Corynebacterium stationis CRBM6	Actinobacteria	0	0	0.778509	83.704
Listeria fleischmannii subsp. fleischmannii LU2006-1	Firmicutes	Listeria monocytogenes serotype 4bV str. LS542	Firmicutes	0	0	0.778159	95.139
Staphylococcus lentus Ca2	Firmicutes	Staphylococcus warneri 1445	Firmicutes	1	591	0.776914	96.695
Chryseobacterium vrystaatense PCAIF2.7	g-Proteobacteria	Chryseobacterium bovis Pi18	g-Proteobacteria	0	0	0.776406	94.766
Staphylococcus equorum BC15	Firmicutes	Staphylococcus fleuretti CIP106114	Firmicutes	0	0	0.774443	97.054
Staphylococcus fleuretti CIP106114	Firmicutes	Staphylococcus warneri 1445	Firmicutes	0	0	0.774173	95.035
Glutamicibacter sp. BW78	Actinobacteria	Glutamicibacter arilaitensis Re117	Actinobacteria	0	0	0.76708	95.338
Staphylococcus equorum BC9	Firmicutes	Staphylococcus vitulinus Ma1	Firmicutes	0	0	0.766874	97.28
Glutamicibacter arilaitensis JB182	Actinobacteria	Glutamicibacter sp. BW78	Actinobacteria	0	0	0.766731	95.325
Lactococcus plantarum NCDO 1869	Firmicutes	Lactococcus garvieae N201	Firmicutes	0	0	0.766145	90.847
Glutamicibacter sp. BW78	Actinobacteria	Glutamicibacter arilaitensis 3M03	Actinobacteria	0	0	0.765835	95.39
Glutamicibacter arilaitensis GMPA29	Actinobacteria	Glutamicibacter sp. BW78	Actinobacteria	0	0	0.765441	93.925
Paenibacillus lactis CIP 108827	Firmicutes	Paenibacillus sp. 3M17	Firmicutes	0	0	0.765351	96.521
Lactococcus raffinolactis NCDO617	Firmicutes	Lactococcus garvieae N201	Firmicutes	0	0	0.765076	90.847
Staphylococcus equorum BC15	Firmicutes	Staphylococcus vitulinus Ma1	Firmicutes	0	0	0.764636	97.28
Vagococcus lutrae FAM208	Firmicutes	Vagococcus fluvialis bH819	Firmicutes	1	507	0.761772	96.448
Staphylococcus lentus Ca2	Firmicutes	Staphylococcus caprae DSM 20608	Firmicutes	0	0	0.761145	97.861
Glutamicibacter arilaitensis Ca106	Actinobacteria	Glutamicibacter sp. BW78	Actinobacteria	0	0	0.76095	95.39
Staphylococcus fleuretti CIP106114	Firmicutes	Staphylococcus caprae DSM 20608	Firmicutes	0	0	0.760845	96.564
Staphylococcus lentus Ca2	Firmicutes	Staphylococcus equorum BC15	Firmicutes	0	0	0.760572	96.133
Staphylococcus lentus Ca2	Firmicutes	Staphylococcus equorum BC9	Firmicutes	0	0	0.75985	96.022
Staphylococcus caprae DSM 20608	Firmicutes	Staphylococcus vitulinus Ma1	Firmicutes	0	0	0.757524	97.46
Bacillus galactosidilyticus CIP 108417	Firmicutes	Bacillus pumilus M21	Firmicutes	0	0	0.747013	92.011
Corynebacterium flavescens Mu128	Actinobacteria	Corynebacterium variabile	Actinobacteria	0	0	0.746199	84.522
Bacillus altitudinis 263	Firmicutes	Bacillus fordii CIP 108821	Firmicutes	0	0	0.736731	92.256
Bacillus fordii CIP 108821	Firmicutes	Bacillus pumilus M21	Firmicutes	0	0	0.731599	90.657
Corynebacterium casei LMG S-19264	Actinobacteria	Advenella kashmirensis 3T5F	g-Proteobacteria	0	0	0	71.596
Corynebacterium casei LMG S-19264	Actinobacteria	Vibrio casei JB196	g-Proteobacteria	0	0	0	78.332
Corynebacterium casei LMG S-19264	Actinobacteria	Vibrio casei ws4539	g-Proteobacteria	0	0	0	78.246
Corynebacterium casei LMG S-19264	Actinobacteria	Lactococcus plantarum NCDO 1869	Firmicutes	0	0	0	77.149
Corynebacterium casei LMG S-19264	Actinobacteria	Glutamicibacter bergerei BW77	Actinobacteria	4	3759	0	87.103
Corynebacterium casei LMG S-19264	Actinobacteria	Alkalibacterium kapii FAM208 38	Firmicutes	0	0	0	73.425
Corynebacterium casei LMG S-19264	Actinobacteria	Listeria fleischmannii subsp. fleischmannii LU2006-1	Firmicutes	0	0	0	76.902
Corynebacterium casei LMG S-19264	Actinobacteria	Alcaligenes sp. 2L29	g-Proteobacteria	0	0	0	75.059
Corynebacterium casei LMG S-19264	Actinobacteria	Paenibacillus lactis CIP 108827	Firmicutes	0	0	0	79.434
Corynebacterium casei LMG S-19264	Actinobacteria	Brachybacterium alimentarium 738.10	Actinobacteria	3	3225	0	86.727
Corynebacterium casei LMG S-19264	Actinobacteria	Halomonas sp. 1M45	g-Proteobacteria	0	0	0	76.906
Corynebacterium casei LMG S-19264	Actinobacteria	Brevibacterium linens BL2	Actinobacteria	78	88141	0	85.262
Corynebacterium casei LMG S-19264	Actinobacteria	Pseudomonas lundensis PCAiD2.2	g-Proteobacteria	0	0	0	78.327
Corynebacterium casei LMG S-19264	Actinobacteria	Brevibacterium linens 876.7	Actinobacteria	3	3654	0	85.197
Corynebacterium casei LMG S-19264	Actinobacteria	Brevibacterium linens 900.6	Actinobacteria	5	5616	0	85.262
Corynebacterium casei LMG S-19264	Actinobacteria	Psychrobacter aquimaris ER15 174 BHI7	g-Proteobacteria	0	0	0	75.723
Corynebacterium casei LMG S-19264	Actinobacteria	Glutamicibacter sp. BW80	Actinobacteria	0	0	0	87.168
Corynebacterium casei LMG S-19264	Actinobacteria	Leuconostoc pseudomesenteroides MSE7	Firmicutes	0	0	0	73.108
Corynebacterium casei LMG S-19264	Actinobacteria	Pseudomonas fluorescens PCAiD6.2	g-Proteobacteria	0	0	0	72.214
Corynebacterium casei LMG S-19264	Actinobacteria	Bavariicoccus seileri ws4188	Firmicutes	0	0	0	73.201
Corynebacterium casei LMG S-19264	Actinobacteria	Ornithinibacillus bavariensis CIP 109287	Firmicutes	0	0	0	79.151
Corynebacterium casei LMG S-19264	Actinobacteria	Bacillus altitudinis 263	Firmicutes	0	0	0	78.862
Corynebacterium casei LMG S-19264	Actinobacteria	Brachybacterium alimentarium JB7	Actinobacteria	2	1962	0	86.727
Corynebacterium casei LMG S-19264	Actinobacteria	Kluyvera intermedia TL336A	g-Proteobacteria	0	0	0	72.819
Corynebacterium casei LMG S-19264	Actinobacteria	Glutamicibacter arilaitensis Ca106	Actinobacteria	0	0	0	85.137
Corynebacterium casei LMG S-19264	Actinobacteria	Propionibacterium acidipropinicii LSPAc1	Actinobacteria	0	0	0	77.922
Corynebacterium casei LMG S-19264	Actinobacteria	Serratia rubidaea TA 26	g-Proteobacteria	0	0	0	74.662
Corynebacterium casei LMG S-19264	Actinobacteria	Psychrobacter celer 91	g-Proteobacteria	0	0	0	78.295
Corynebacterium casei LMG S-19264	Actinobacteria	Luteococcus japonicus LSP Lj1	Actinobacteria	0	0	0	82.489
Corynebacterium casei LMG S-19264	Actinobacteria	Brevundimonas diminuta 3F5N	a-Proteobacteria	0	0	0	74.223
Corynebacterium casei LMG S-19264	Actinobacteria	Brevibacterium linens 862.7	Actinobacteria	2	2379	0	85.262
Corynebacterium casei LMG S-19264	Actinobacteria	Klebsiella oxytoca Pi20	g-Proteobacteria	0	0	0	72.511
Corynebacterium casei LMG S-19264	Actinobacteria	Chryseobacterium bovis Pi18	g-Proteobacteria	0	0	0	73.154
Corynebacterium casei LMG S-19264	Actinobacteria	Staphylococcus lentus Ca2	Firmicutes	0	0	0	75.386
Corynebacterium casei LMG S-19264	Actinobacteria	Halomonas venusta 3D7M	g-Proteobacteria	0	0	0	77.128
Corynebacterium casei LMG S-19264	Actinobacteria	Lactobacillus casei ATCC 334 (Lactobacillus paracasei ATCC 334)	Firmicutes	0	0	0	76.563
Corynebacterium casei LMG S-19264	Actinobacteria	Propionibacterium freudenreichii subsp. shermanii CIRM-BIA1	Actinobacteria	0	0	0	84.303
Corynebacterium casei LMG S-19264	Actinobacteria	Listeria monocytogenes serotype 4bV str. LS542	Firmicutes	0	0	0	76.407
Corynebacterium casei LMG S-19264	Actinobacteria	Acinetobacter genospecies 3 PCAiE6.10	g-Proteobacteria	0	0	0	78.685
Corynebacterium casei LMG S-19264	Actinobacteria	Kocuria varians Mu208	Actinobacteria	0	0	0	86.138
Corynebacterium casei LMG S-19264	Actinobacteria	Brachybacterium alimentarium CNRZ925	Actinobacteria	0	0	0	86.603
Corynebacterium casei LMG S-19264	Actinobacteria	Weissella cibaria 3386	Firmicutes	0	0	0	83.865
Corynebacterium casei LMG S-19264	Actinobacteria	Sphingobacterium faecium PCAiF2.5	g-Proteobacteria	0	0	0	70.809
Corynebacterium casei LMG S-19264	Actinobacteria	Brachybacterium alimentarium 908.11	Actinobacteria	0	0	0	86.727
Corynebacterium casei LMG S-19264	Actinobacteria	Corynebacterium variabile	Actinobacteria	0	0	0	86.693
Corynebacterium casei LMG S-19264	Actinobacteria	Brevibacterium linens 341.13	Actinobacteria	1	1275	0	85.262
Corynebacterium casei LMG S-19264	Actinobacteria	Morganella psychrotolerans 925	g-Proteobacteria	0	0	0	76.581
Corynebacterium casei LMG S-19264	Actinobacteria	Raoultella planticola 3M45	g-Proteobacteria	0	0	0	78.104
Corynebacterium casei LMG S-19264	Actinobacteria	Lactococcus raffinolactis NCDO617	Firmicutes	0	0	0	77.149
Corynebacterium casei LMG S-19264	Actinobacteria	Streptococcus infantarius subsp. infantarius 3AG	Firmicutes	0	0	0	74.781
Corynebacterium casei LMG S-19264	Actinobacteria	Citrococcus sp. ws2216	Actinobacteria	0	0	0	85.913
Corynebacterium casei LMG S-19264	Actinobacteria	Brevibacterium iodinum ATCC 49514	Actinobacteria	0	0	0	83.889
Corynebacterium casei LMG S-19264	Actinobacteria	Leucobacter komagatae 1L36	Actinobacteria	0	0	0	83.466
Corynebacterium casei LMG S-19264	Actinobacteria	Halomonas venusta 3A7M	g-Proteobacteria	0	0	0	77.128
Corynebacterium casei LMG S-19264	Actinobacteria	Microbacterium sp. JB110	Actinobacteria	5	4449	0	85.584
Corynebacterium casei LMG S-19264	Actinobacteria	Pseudoalteromonas sp JB197	g-Proteobacteria	0	0	0	76.698
Corynebacterium casei LMG S-19264	Actinobacteria	Enterococcus malodoratus FAM208 55	Firmicutes	0	0	0	74.288
Corynebacterium casei LMG S-19264	Actinobacteria	Enterococcus hirae SB10	Firmicutes	0	0	0	72.869
Corynebacterium casei LMG S-19264	Actinobacteria	Halomonas sp JB37	g-Proteobacteria	0	0	0	75.985
Corynebacterium casei LMG S-19264	Actinobacteria	Macrococcus caseolyticus ATCC 13458	Firmicutes	0	0	0	78.175
Corynebacterium casei LMG S-19264	Actinobacteria	Brevibacterium linens 947.7	Actinobacteria	6	6480	0	85.262
Corynebacterium casei LMG S-19264	Actinobacteria	Jeotgalicoccus psychrophilus CRBMD21	Firmicutes	0	0	0	76.03
Corynebacterium casei LMG S-19264	Actinobacteria	Brevibacterium linens JB5	Actinobacteria	18	22316	0	85.262
Corynebacterium casei LMG S-19264	Actinobacteria	Delftia acidovorans PCA12	g-Proteobacteria	0	0	0	74.246
Corynebacterium casei LMG S-19264	Actinobacteria	Pseudomonas pseudojaponica PCAi6.5	g-Proteobacteria	0	0	0	75.569
Corynebacterium casei LMG S-19264	Actinobacteria	Bacillus fordii CIP 108821	Firmicutes	0	0	0	77.441
Corynebacterium casei LMG S-19264	Actinobacteria	Leuconostoc citreum MSE2	Firmicutes	0	0	0	70.96
Corynebacterium casei LMG S-19264	Actinobacteria	Morganella morganii subsp. siboni 3A5A	g-Proteobacteria	0	0	0	78.429
Corynebacterium casei LMG S-19264	Actinobacteria	Brachybacterium alimentarium 962.10	Actinobacteria	3	3225	0	86.727
Corynebacterium casei LMG S-19264	Actinobacteria	Lactococcus garvieae N201	Firmicutes	0	0	0	75
Corynebacterium casei LMG S-19264	Actinobacteria	Brevibacillus parabrevis CIP 110335	Firmicutes	0	0	0	78.89
Corynebacterium casei LMG S-19264	Actinobacteria	Brachybacterium alimentarium 876.9	Actinobacteria	2	2607	0	86.727
Corynebacterium casei LMG S-19264	Actinobacteria	Staphylococcus xylosus	Firmicutes	0	0	0	74.199
Corynebacterium casei LMG S-19264	Actinobacteria	Chryseobacterium joostei PCAiD6.3	g-Proteobacteria	0	0	0	73.778
Corynebacterium casei LMG S-19264	Actinobacteria	Microbacterium oxydans PCA1	Actinobacteria	0	0	0	80.066
Corynebacterium casei LMG S-19264	Actinobacteria	Exiguobacterium acetylicum 180	Firmicutes	0	0	0	72.719
Corynebacterium casei LMG S-19264	Actinobacteria	Corynebacterium variabile DSM 44702	Actinobacteria	0	0	0	92.994
Corynebacterium casei LMG S-19264	Actinobacteria	Enterococcus durans LMG10746	Firmicutes	0	0	0	73.695
Corynebacterium casei LMG S-19264	Actinobacteria	Stenotrophomonas rhizophila PCA13	g-Proteobacteria	0	0	0	79.536
Corynebacterium casei LMG S-19264	Actinobacteria	Chryseobacterium ginsengisoli M17	g-Proteobacteria	0	0	0	71.166
Corynebacterium casei LMG S-19264	Actinobacteria	Bacillus galactosidilyticus CIP 108417	Firmicutes	1	1249	0	77.517
Corynebacterium casei LMG S-19264	Actinobacteria	Chryseobacterium vrystaatense PCAIF2.7	g-Proteobacteria	0	0	0	76.551
Corynebacterium casei LMG S-19264	Actinobacteria	Raoultella ornithinolytica TL332	g-Proteobacteria	0	0	0	73.51
Corynebacterium casei LMG S-19264	Actinobacteria	Glutamicibacter arilaitensis GMPA29	Actinobacteria	1	618	0	82.198
Corynebacterium casei LMG S-19264	Actinobacteria	Microbacterium gubbeenense DSM 15944	Actinobacteria	1	1716	0	86.234
Corynebacterium casei LMG S-19264	Actinobacteria	Staphylococcus fleuretti CIP106114	Firmicutes	0	0	0	77.163
Corynebacterium casei LMG S-19264	Actinobacteria	Vagococcus fluvialis bH819	Firmicutes	0	0	0	74.545
Corynebacterium casei LMG S-19264	Actinobacteria	Providencia heimbachae GR4	g-Proteobacteria	0	0	0	77.845
Corynebacterium casei LMG S-19264	Actinobacteria	Pantoea agglomerans PCAiQ6.3	g-Proteobacteria	0	0	0	70.696
Corynebacterium casei LMG S-19264	Actinobacteria	Agrococcus casei LMG22410	Actinobacteria	0	0	0	83.816
Corynebacterium casei LMG S-19264	Actinobacteria	Psychrobacter faecalis H5	g-Proteobacteria	0	0	0	76.265
Corynebacterium casei LMG S-19264	Actinobacteria	Kocuria carniphila CRBM38	Actinobacteria	0	0	0	83.865
Corynebacterium casei LMG S-19264	Actinobacteria	Lactobacillus casei BD-II	Firmicutes	0	0	0	76.563
Corynebacterium casei LMG S-19264	Actinobacteria	Comamonas testosteroni NL2512	g-Proteobacteria	0	0	0	70.961
Corynebacterium casei LMG S-19264	Actinobacteria	Pseudomonas psychrophila 1E44	g-Proteobacteria	0	0	0	77.704
Corynebacterium casei LMG S-19264	Actinobacteria	Alcaligenes faecalis 2L10	g-Proteobacteria	0	0	0	75.708
Corynebacterium casei LMG S-19264	Actinobacteria	Staphylococcus caprae DSM 20608	Firmicutes	0	0	0	78.331
Corynebacterium casei LMG S-19264	Actinobacteria	Brachybacterium alimentarium 900.8	Actinobacteria	2	1962	0	86.727
Corynebacterium casei LMG S-19264	Actinobacteria	Streptococcus salivarius CJ181	Firmicutes	0	0	0	74.386
Corynebacterium casei LMG S-19264	Actinobacteria	Psychrobacter immobilis PG1	g-Proteobacteria	0	0	0	77.433
Corynebacterium casei LMG S-19264	Actinobacteria	Brevibacterium linens 962.8	Actinobacteria	5	5616	0	85.262
Corynebacterium casei LMG S-19264	Actinobacteria	Glutamicibacter sp. BW78	Actinobacteria	0	0	0	87.881
Corynebacterium casei LMG S-19264	Actinobacteria	Bacillus pumilus M21	Firmicutes	0	0	0	77.206
Corynebacterium casei LMG S-19264	Actinobacteria	Streptococcus infantarius 11FA	Firmicutes	0	0	0	75.043
Corynebacterium casei LMG S-19264	Actinobacteria	Stenotrophomonas indologenes PCAi2.2	g-Proteobacteria	0	0	0	76.088
Corynebacterium casei LMG S-19264	Actinobacteria	Staphylococcus equorum BC9	Firmicutes	0	0	0	75.719
Corynebacterium casei LMG S-19264	Actinobacteria	Brevibacterium linens 908.7	Actinobacteria	2	2298	0	85.262
Corynebacterium casei LMG S-19264	Actinobacteria	Brochothrix thermosphacta cH814	Firmicutes	0	0	0	76.016
Corynebacterium casei LMG S-19264	Actinobacteria	Leucobacter sp. ER15 166 BHI15	Actinobacteria	0	0	0	82.399
Corynebacterium casei LMG S-19264	Actinobacteria	Facklamia tabacinasalis FAM208 56	Firmicutes	0	0	0	76.397
Corynebacterium casei LMG S-19264	Actinobacteria	Enterococcus saccharominimus M17 423	Firmicutes	0	0	0	75.148
Corynebacterium casei LMG S-19264	Actinobacteria	Brevibacterium antiquum CNRZ918	Actinobacteria	57	73794	0	84.636
Corynebacterium casei LMG S-19264	Actinobacteria	Sphingobacterium sp JB170	g-Proteobacteria	0	0	0	70.058
Corynebacterium casei LMG S-19264	Actinobacteria	Chryseobacterium shigense PCAiB2.3	g-Proteobacteria	0	0	0	73.856
Corynebacterium casei LMG S-19264	Actinobacteria	Vagococcus lutrae FAM208	Firmicutes	0	0	0	77.191
Corynebacterium casei LMG S-19264	Actinobacteria	Staphylococcus vitulinus Ma1	Firmicutes	0	0	0	78.784
Corynebacterium casei LMG S-19264	Actinobacteria	Lactobacillus brevis KB290	Firmicutes	0	0	0	74.948
Corynebacterium casei LMG S-19264	Actinobacteria	Psychrobacter sp JB193	g-Proteobacteria	0	0	0	77.434
Corynebacterium casei LMG S-19264	Actinobacteria	Halomonas venusta 3F2F	g-Proteobacteria	0	0	0	76.267
Corynebacterium casei LMG S-19264	Actinobacteria	Paenibacillus sp. 3M17	Firmicutes	0	0	0	79.418
Corynebacterium casei LMG S-19264	Actinobacteria	Serratia proteamaculans 1C2F	g-Proteobacteria	0	0	0	77.548
Corynebacterium casei LMG S-19264	Actinobacteria	Glutamicibacter arilaitensis Re117	Actinobacteria	5	6120	0	87.353
Corynebacterium casei LMG S-19264	Actinobacteria	Lactobacillus brevis ATCC 367	Firmicutes	0	0	0	74.948
Corynebacterium casei LMG S-19264	Actinobacteria	Citrobacter freundii Pi15	g-Proteobacteria	0	0	0	75.699
Corynebacterium casei LMG S-19264	Actinobacteria	Propionibacterium thoenii LSPTH1	Actinobacteria	0	0	0	83.614
Corynebacterium casei LMG S-19264	Actinobacteria	Glutamicibacter arilaitensis 3M03	Actinobacteria	3	3225	0	85.137
Corynebacterium casei LMG S-19264	Actinobacteria	Brevibacterium linens ATCC 9172	Actinobacteria	32	39663	0	83.897
Corynebacterium casei LMG S-19264	Actinobacteria	Weissella cibaria 3385	Firmicutes	0	0	0	76.481
Corynebacterium casei LMG S-19264	Actinobacteria	Rothia mucilaginosa M1710	Actinobacteria	1	891	0	82.273
Corynebacterium casei LMG S-19264	Actinobacteria	Brachybacterium alimentarium 341.9	Actinobacteria	5	4900	0	86.727
Corynebacterium casei LMG S-19264	Actinobacteria	Brevibacterium casei S18	Actinobacteria	0	0	0	86.454
Corynebacterium casei LMG S-19264	Actinobacteria	Pseudomonas fragi 1E26	g-Proteobacteria	0	0	0	77.837
Corynebacterium casei LMG S-19264	Actinobacteria	Enterobacter amnigenus CV9	g-Proteobacteria	0	0	0	71.448
Corynebacterium casei LMG S-19264	Actinobacteria	Carnobacterium maltaromaticum 38b	Firmicutes	0	0	0	74.772
Corynebacterium casei LMG S-19264	Actinobacteria	Glutamicibacter arilaitensis JB182	Actinobacteria	8	6063	0	87.427
Corynebacterium casei LMG S-19264	Actinobacteria	Psychrobacter namhaensis 1439	g-Proteobacteria	0	0	0	76.869
Corynebacterium casei LMG S-19264	Actinobacteria	Micrococcus luteus Mu201	Actinobacteria	0	0	0	86.505
Corynebacterium casei LMG S-19264	Actinobacteria	Pediococcus parvulus CIRM750	Actinobacteria	0	0	0	86.505
Corynebacterium casei LMG S-19264	Actinobacteria	Exiguobacterium sibiricum NL255	Firmicutes	5	3738	0	76.309
Corynebacterium casei LMG S-19264	Actinobacteria	Acinetobacter johnsonii 3M05	g-Proteobacteria	0	0	0	77.791
Corynebacterium casei LMG S-19264	Actinobacteria	Lactobacillus crustorum FH4	Firmicutes	0	0	0	72.138
Corynebacterium casei LMG S-19264	Actinobacteria	Serratia marescens 448	g-Proteobacteria	0	0	0	78.016
Corynebacterium casei LMG S-19264	Actinobacteria	Staphylococcus equorum BC15	Firmicutes	0	0	0	75.847
Corynebacterium casei LMG S-19264	Actinobacteria	Stenotrophomonas maltophilia Pi1	g-Proteobacteria	0	0	0	76.76
Corynebacterium casei LMG S-19264	Actinobacteria	Listeria monocytogenes str. Scott A	Firmicutes	0	0	0	76.358
Corynebacterium casei LMG S-19264	Actinobacteria	Brachybacterium alimentarium 862.8	Actinobacteria	3	3225	0	86.727
Corynebacterium casei LMG S-19264	Actinobacteria	Brevibacterium casei CIP 102111	Actinobacteria	0	0	0	82.892
Corynebacterium casei LMG S-19264	Actinobacteria	Brevibacterium linens 738.8	Actinobacteria	2	2298	0	85.262
Corynebacterium casei LMG S-19264	Actinobacteria	Mycobacterium vaccae CIP 105934	Actinobacteria	0	0	0	86.117
Corynebacterium casei LMG S-19264	Actinobacteria	Proteus vulgaris 1M25	g-Proteobacteria	0	0	0	75.209
Corynebacterium casei LMG S-19264	Actinobacteria	Leuconostoc mesenteroides CNRZ1283	Firmicutes	0	0	0	72.628
Corynebacterium casei LMG S-19264	Actinobacteria	Brachybacterium alimentarium 947.11	Actinobacteria	2	1962	0	86.768
Corynebacterium casei LMG S-19264	Actinobacteria	Streptococcus macedonicus 679	Firmicutes	0	0	0	75.41
Corynebacterium casei LMG S-19264	Actinobacteria	Staphylococcus warneri 1445	Firmicutes	0	0	0	75.278
Corynebacterium casei LMG S-19264	Actinobacteria	Providencia rettgeri 947	g-Proteobacteria	0	0	0	76.531
Corynebacterium casei LMG S-19264	Actinobacteria	Proteus hauseri 1M10	g-Proteobacteria	0	0	0	78.276
Corynebacterium casei LMG S-19264	Actinobacteria	Vibrio litoralis B4	g-Proteobacteria	0	0	0	78.418
Corynebacterium casei LMG S-19264	Actinobacteria	Providencia alcalifaciens GM3	g-Proteobacteria	0	0	0	75.994
Advenella kashmirensis 3T5F	g-Proteobacteria	Vibrio casei JB196	g-Proteobacteria	3	2838	0	81.826
Advenella kashmirensis 3T5F	g-Proteobacteria	Vibrio casei ws4539	g-Proteobacteria	0	0	0	81.74
Advenella kashmirensis 3T5F	g-Proteobacteria	Lactococcus plantarum NCDO 1869	Firmicutes	0	0	0	75.381
Advenella kashmirensis 3T5F	g-Proteobacteria	Glutamicibacter bergerei BW77	Actinobacteria	0	0	0	72.173
Advenella kashmirensis 3T5F	g-Proteobacteria	Alkalibacterium kapii FAM208 38	Firmicutes	0	0	0	71.808
Advenella kashmirensis 3T5F	g-Proteobacteria	Listeria fleischmannii subsp. fleischmannii LU2006-1	Firmicutes	0	0	0	75.771
Advenella kashmirensis 3T5F	g-Proteobacteria	Alcaligenes sp. 2L29	g-Proteobacteria	0	0	0	95.647
Advenella kashmirensis 3T5F	g-Proteobacteria	Paenibacillus lactis CIP 108827	Firmicutes	0	0	0	79.022
Advenella kashmirensis 3T5F	g-Proteobacteria	Corynebacterium ammoniagenes ws2211	Actinobacteria	0	0	0	74.658
Advenella kashmirensis 3T5F	g-Proteobacteria	Brachybacterium alimentarium 738.10	Actinobacteria	0	0	0	72.283
Advenella kashmirensis 3T5F	g-Proteobacteria	Halomonas sp. 1M45	g-Proteobacteria	3	2838	0	82.552
Advenella kashmirensis 3T5F	g-Proteobacteria	Brevibacterium linens BL2	Actinobacteria	0	0	0	71.085
Advenella kashmirensis 3T5F	g-Proteobacteria	Pseudomonas lundensis PCAiD2.2	g-Proteobacteria	0	0	0	82.095
Advenella kashmirensis 3T5F	g-Proteobacteria	Brevibacterium linens 876.7	Actinobacteria	0	0	0	71.016
Advenella kashmirensis 3T5F	g-Proteobacteria	Brevibacterium linens 900.6	Actinobacteria	0	0	0	71.085
Advenella kashmirensis 3T5F	g-Proteobacteria	Psychrobacter aquimaris ER15 174 BHI7	g-Proteobacteria	0	0	0	84.722
Advenella kashmirensis 3T5F	g-Proteobacteria	Glutamicibacter sp. BW80	Actinobacteria	0	0	0	72.31
Advenella kashmirensis 3T5F	g-Proteobacteria	Leuconostoc pseudomesenteroides MSE7	Firmicutes	0	0	0	74.725
Advenella kashmirensis 3T5F	g-Proteobacteria	Pseudomonas fluorescens PCAiD6.2	g-Proteobacteria	0	0	0	81.633
Advenella kashmirensis 3T5F	g-Proteobacteria	Bavariicoccus seileri ws4188	Firmicutes	0	0	0	71.094
Advenella kashmirensis 3T5F	g-Proteobacteria	Ornithinibacillus bavariensis CIP 109287	Firmicutes	0	0	0	78.222
Advenella kashmirensis 3T5F	g-Proteobacteria	Bacillus altitudinis 263	Firmicutes	0	0	0	77.748
Advenella kashmirensis 3T5F	g-Proteobacteria	Brachybacterium alimentarium JB7	Actinobacteria	0	0	0	72.283
Advenella kashmirensis 3T5F	g-Proteobacteria	Kluyvera intermedia TL336A	g-Proteobacteria	0	0	0	79.665
Advenella kashmirensis 3T5F	g-Proteobacteria	Corynebacterium flavescens Mu128	Actinobacteria	0	0	0	71.08
Advenella kashmirensis 3T5F	g-Proteobacteria	Glutamicibacter arilaitensis Ca106	Actinobacteria	0	0	0	70.316
Advenella kashmirensis 3T5F	g-Proteobacteria	Propionibacterium acidipropinicii LSPAc1	Actinobacteria	0	0	0	63.354
Advenella kashmirensis 3T5F	g-Proteobacteria	Serratia rubidaea TA 26	g-Proteobacteria	0	0	0	79.939
Advenella kashmirensis 3T5F	g-Proteobacteria	Psychrobacter celer 91	g-Proteobacteria	0	0	0	84.469
Advenella kashmirensis 3T5F	g-Proteobacteria	Luteococcus japonicus LSP Lj1	Actinobacteria	0	0	0	70.274
Advenella kashmirensis 3T5F	g-Proteobacteria	Brevundimonas diminuta 3F5N	a-Proteobacteria	0	0	0	75.607
Advenella kashmirensis 3T5F	g-Proteobacteria	Brevibacterium linens 862.7	Actinobacteria	0	0	0	71.085
Advenella kashmirensis 3T5F	g-Proteobacteria	Klebsiella oxytoca Pi20	g-Proteobacteria	0	0	0	79.461
Advenella kashmirensis 3T5F	g-Proteobacteria	Chryseobacterium bovis Pi18	g-Proteobacteria	0	0	0	75.543
Advenella kashmirensis 3T5F	g-Proteobacteria	Staphylococcus lentus Ca2	Firmicutes	0	0	0	74.753
Advenella kashmirensis 3T5F	g-Proteobacteria	Halomonas venusta 3D7M	g-Proteobacteria	0	0	0	81.568
Advenella kashmirensis 3T5F	g-Proteobacteria	Lactobacillus casei ATCC 334 (Lactobacillus paracasei ATCC 334)	Firmicutes	0	0	0	73.106
Advenella kashmirensis 3T5F	g-Proteobacteria	Corynebacterium casei UCMA 3821	Actinobacteria	0	0	0	71.596
Advenella kashmirensis 3T5F	g-Proteobacteria	Propionibacterium freudenreichii subsp. shermanii CIRM-BIA1	Actinobacteria	0	0	0	71.212
Advenella kashmirensis 3T5F	g-Proteobacteria	Listeria monocytogenes serotype 4bV str. LS542	Firmicutes	0	0	0	74.414
Advenella kashmirensis 3T5F	g-Proteobacteria	Acinetobacter genospecies 3 PCAiE6.10	g-Proteobacteria	0	0	0	81.471
Advenella kashmirensis 3T5F	g-Proteobacteria	Kocuria varians Mu208	Actinobacteria	0	0	0	72.191
Advenella kashmirensis 3T5F	g-Proteobacteria	Brachybacterium alimentarium CNRZ925	Actinobacteria	0	0	0	72.077
Advenella kashmirensis 3T5F	g-Proteobacteria	Weissella cibaria 3386	Firmicutes	0	0	0	69.938
Advenella kashmirensis 3T5F	g-Proteobacteria	Sphingobacterium faecium PCAiF2.5	g-Proteobacteria	0	0	0	71.025
Advenella kashmirensis 3T5F	g-Proteobacteria	Brachybacterium alimentarium 908.11	Actinobacteria	0	0	0	72.283
Advenella kashmirensis 3T5F	g-Proteobacteria	Corynebacterium variabile	Actinobacteria	0	0	0	73.764
Advenella kashmirensis 3T5F	g-Proteobacteria	Corynebacterium stationis CRBM6	Actinobacteria	0	0	0	62.479
Advenella kashmirensis 3T5F	g-Proteobacteria	Brevibacterium linens 341.13	Actinobacteria	0	0	0	71.154
Advenella kashmirensis 3T5F	g-Proteobacteria	Morganella psychrotolerans 925	g-Proteobacteria	0	0	0	82.063
Advenella kashmirensis 3T5F	g-Proteobacteria	Raoultella planticola 3M45	g-Proteobacteria	0	0	0	83.936
Advenella kashmirensis 3T5F	g-Proteobacteria	Lactococcus raffinolactis NCDO617	Firmicutes	0	0	0	75.381
Advenella kashmirensis 3T5F	g-Proteobacteria	Streptococcus infantarius subsp. infantarius 3AG	Firmicutes	0	0	0	77.368
Advenella kashmirensis 3T5F	g-Proteobacteria	Citrococcus sp. ws2216	Actinobacteria	0	0	0	71.192
Advenella kashmirensis 3T5F	g-Proteobacteria	Brevibacterium iodinum ATCC 49514	Actinobacteria	0	0	0	70.496
Advenella kashmirensis 3T5F	g-Proteobacteria	Leucobacter komagatae 1L36	Actinobacteria	0	0	0	70.662
Advenella kashmirensis 3T5F	g-Proteobacteria	Halomonas venusta 3A7M	g-Proteobacteria	0	0	0	81.568
Advenella kashmirensis 3T5F	g-Proteobacteria	Microbacterium sp. JB110	Actinobacteria	0	0	0	73.352
Advenella kashmirensis 3T5F	g-Proteobacteria	Pseudoalteromonas sp JB197	g-Proteobacteria	0	0	0	83.32
Advenella kashmirensis 3T5F	g-Proteobacteria	Enterococcus malodoratus FAM208 55	Firmicutes	0	0	0	71.255
Advenella kashmirensis 3T5F	g-Proteobacteria	Enterococcus hirae SB10	Firmicutes	0	0	0	70.459
Advenella kashmirensis 3T5F	g-Proteobacteria	Halomonas sp JB37	g-Proteobacteria	3	2838	0	81.789
Advenella kashmirensis 3T5F	g-Proteobacteria	Macrococcus caseolyticus ATCC 13458	Firmicutes	0	0	0	77.211
Advenella kashmirensis 3T5F	g-Proteobacteria	Brevibacterium linens 947.7	Actinobacteria	0	0	0	71.085
Advenella kashmirensis 3T5F	g-Proteobacteria	Jeotgalicoccus psychrophilus CRBMD21	Firmicutes	0	0	0	74.755
Advenella kashmirensis 3T5F	g-Proteobacteria	Brevibacterium linens JB5	Actinobacteria	0	0	0	71.154
Advenella kashmirensis 3T5F	g-Proteobacteria	Delftia acidovorans PCA12	g-Proteobacteria	0	0	0	87.565
Advenella kashmirensis 3T5F	g-Proteobacteria	Pseudomonas pseudojaponica PCAi6.5	g-Proteobacteria	0	0	0	81.224
Advenella kashmirensis 3T5F	g-Proteobacteria	Bacillus fordii CIP 108821	Firmicutes	0	0	0	79.63
Advenella kashmirensis 3T5F	g-Proteobacteria	Leuconostoc citreum MSE2	Firmicutes	0	0	0	72.168
Advenella kashmirensis 3T5F	g-Proteobacteria	Morganella morganii subsp. siboni 3A5A	g-Proteobacteria	0	0	0	83.445
Advenella kashmirensis 3T5F	g-Proteobacteria	Brachybacterium alimentarium 962.10	Actinobacteria	0	0	0	72.283
Advenella kashmirensis 3T5F	g-Proteobacteria	Lactococcus garvieae N201	Firmicutes	0	0	0	74.081
Advenella kashmirensis 3T5F	g-Proteobacteria	Brevibacillus parabrevis CIP 110335	Firmicutes	0	0	0	77.679
Advenella kashmirensis 3T5F	g-Proteobacteria	Brachybacterium alimentarium 876.9	Actinobacteria	0	0	0	72.283
Advenella kashmirensis 3T5F	g-Proteobacteria	Staphylococcus xylosus	Firmicutes	0	0	0	75
Advenella kashmirensis 3T5F	g-Proteobacteria	Chryseobacterium joostei PCAiD6.3	g-Proteobacteria	0	0	0	74.33
Advenella kashmirensis 3T5F	g-Proteobacteria	Microbacterium oxydans PCA1	Actinobacteria	0	0	0	69.071
Advenella kashmirensis 3T5F	g-Proteobacteria	Exiguobacterium acetylicum 180	Firmicutes	0	0	0	71.19
Advenella kashmirensis 3T5F	g-Proteobacteria	Corynebacterium variabile DSM 44702	Actinobacteria	0	0	0	72.452
Advenella kashmirensis 3T5F	g-Proteobacteria	Enterococcus durans LMG10746	Firmicutes	0	0	0	70.693
Advenella kashmirensis 3T5F	g-Proteobacteria	Stenotrophomonas rhizophila PCA13	g-Proteobacteria	0	0	0	85.039
Advenella kashmirensis 3T5F	g-Proteobacteria	Chryseobacterium ginsengisoli M17	g-Proteobacteria	0	0	0	73.121
Advenella kashmirensis 3T5F	g-Proteobacteria	Bacillus galactosidilyticus CIP 108417	Firmicutes	0	0	0	76.26
Advenella kashmirensis 3T5F	g-Proteobacteria	Chryseobacterium vrystaatense PCAIF2.7	g-Proteobacteria	0	0	0	74.333
Advenella kashmirensis 3T5F	g-Proteobacteria	Raoultella ornithinolytica TL332	g-Proteobacteria	0	0	0	78.892
Advenella kashmirensis 3T5F	g-Proteobacteria	Glutamicibacter arilaitensis GMPA29	Actinobacteria	0	0	0	66.814
Advenella kashmirensis 3T5F	g-Proteobacteria	Microbacterium gubbeenense DSM 15944	Actinobacteria	0	0	0	73.045
Advenella kashmirensis 3T5F	g-Proteobacteria	Corynebacterium casei JB4	Actinobacteria	0	0	0	71.596
Advenella kashmirensis 3T5F	g-Proteobacteria	Staphylococcus fleuretti CIP106114	Firmicutes	0	0	0	77.643
Advenella kashmirensis 3T5F	g-Proteobacteria	Vagococcus fluvialis bH819	Firmicutes	0	0	0	74.035
Advenella kashmirensis 3T5F	g-Proteobacteria	Providencia heimbachae GR4	g-Proteobacteria	0	0	0	81.779
Advenella kashmirensis 3T5F	g-Proteobacteria	Pantoea agglomerans PCAiQ6.3	g-Proteobacteria	0	0	0	79.972
Advenella kashmirensis 3T5F	g-Proteobacteria	Agrococcus casei LMG22410	Actinobacteria	0	0	0	71.044
Advenella kashmirensis 3T5F	g-Proteobacteria	Psychrobacter faecalis H5	g-Proteobacteria	0	0	0	84.801
Advenella kashmirensis 3T5F	g-Proteobacteria	Kocuria carniphila CRBM38	Actinobacteria	0	0	0	69.938
Advenella kashmirensis 3T5F	g-Proteobacteria	Lactobacillus casei BD-II	Firmicutes	0	0	0	73.106
Advenella kashmirensis 3T5F	g-Proteobacteria	Comamonas testosteroni NL2512	g-Proteobacteria	0	0	0	86.643
Advenella kashmirensis 3T5F	g-Proteobacteria	Pseudomonas psychrophila 1E44	g-Proteobacteria	0	0	0	83.4
Advenella kashmirensis 3T5F	g-Proteobacteria	Alcaligenes faecalis 2L10	g-Proteobacteria	0	0	0	94.905
Advenella kashmirensis 3T5F	g-Proteobacteria	Staphylococcus caprae DSM 20608	Firmicutes	0	0	0	78.13
Advenella kashmirensis 3T5F	g-Proteobacteria	Brachybacterium alimentarium 900.8	Actinobacteria	0	0	0	72.283
Advenella kashmirensis 3T5F	g-Proteobacteria	Streptococcus salivarius CJ181	Firmicutes	0	0	0	76.45
Advenella kashmirensis 3T5F	g-Proteobacteria	Psychrobacter immobilis PG1	g-Proteobacteria	0	0	0	84.814
Advenella kashmirensis 3T5F	g-Proteobacteria	Brevibacterium linens 962.8	Actinobacteria	0	0	0	71.085
Advenella kashmirensis 3T5F	g-Proteobacteria	Glutamicibacter sp. BW78	Actinobacteria	0	0	0	71.879
Advenella kashmirensis 3T5F	g-Proteobacteria	Bacillus pumilus M21	Firmicutes	0	0	0	75.982
Advenella kashmirensis 3T5F	g-Proteobacteria	Streptococcus infantarius 11FA	Firmicutes	0	0	0	77.226
Advenella kashmirensis 3T5F	g-Proteobacteria	Stenotrophomonas indologenes PCAi2.2	g-Proteobacteria	0	0	0	81.646
Advenella kashmirensis 3T5F	g-Proteobacteria	Staphylococcus equorum BC9	Firmicutes	0	0	0	73.604
Advenella kashmirensis 3T5F	g-Proteobacteria	Brevibacterium linens 908.7	Actinobacteria	0	0	0	71.085
Advenella kashmirensis 3T5F	g-Proteobacteria	Brochothrix thermosphacta cH814	Firmicutes	0	0	0	75.051
Advenella kashmirensis 3T5F	g-Proteobacteria	Leucobacter sp. ER15 166 BHI15	Actinobacteria	0	0	0	70.259
Advenella kashmirensis 3T5F	g-Proteobacteria	Facklamia tabacinasalis FAM208 56	Firmicutes	0	0	0	75.228
Advenella kashmirensis 3T5F	g-Proteobacteria	Enterococcus saccharominimus M17 423	Firmicutes	0	0	0	74.506
Advenella kashmirensis 3T5F	g-Proteobacteria	Brevibacterium antiquum CNRZ918	Actinobacteria	0	0	0	70.822
Advenella kashmirensis 3T5F	g-Proteobacteria	Sphingobacterium sp JB170	g-Proteobacteria	0	0	0	68.273
Advenella kashmirensis 3T5F	g-Proteobacteria	Chryseobacterium shigense PCAiB2.3	g-Proteobacteria	0	0	0	74.655
Advenella kashmirensis 3T5F	g-Proteobacteria	Vagococcus lutrae FAM208	Firmicutes	0	0	0	76.741
Advenella kashmirensis 3T5F	g-Proteobacteria	Staphylococcus vitulinus Ma1	Firmicutes	0	0	0	78.368
Advenella kashmirensis 3T5F	g-Proteobacteria	Lactobacillus brevis KB290	Firmicutes	0	0	0	72.38
Advenella kashmirensis 3T5F	g-Proteobacteria	Psychrobacter sp JB193	g-Proteobacteria	0	0	0	85.505
Advenella kashmirensis 3T5F	g-Proteobacteria	Halomonas venusta 3F2F	g-Proteobacteria	0	0	0	81.2
Advenella kashmirensis 3T5F	g-Proteobacteria	Paenibacillus sp. 3M17	Firmicutes	0	0	0	78.212
Advenella kashmirensis 3T5F	g-Proteobacteria	Serratia proteamaculans 1C2F	g-Proteobacteria	0	0	0	83.111
Advenella kashmirensis 3T5F	g-Proteobacteria	Glutamicibacter arilaitensis Re117	Actinobacteria	0	0	0	72.584
Advenella kashmirensis 3T5F	g-Proteobacteria	Lactobacillus brevis ATCC 367	Firmicutes	0	0	0	72.38
Advenella kashmirensis 3T5F	g-Proteobacteria	Citrobacter freundii Pi15	g-Proteobacteria	0	0	0	81.231
Advenella kashmirensis 3T5F	g-Proteobacteria	Propionibacterium thoenii LSPTH1	Actinobacteria	0	0	0	70.408
Advenella kashmirensis 3T5F	g-Proteobacteria	Glutamicibacter arilaitensis 3M03	Actinobacteria	0	0	0	70.316
Advenella kashmirensis 3T5F	g-Proteobacteria	Brevibacterium linens ATCC 9172	Actinobacteria	0	0	0	70.182
Advenella kashmirensis 3T5F	g-Proteobacteria	Weissella cibaria 3385	Firmicutes	0	0	0	99.741
Advenella kashmirensis 3T5F	g-Proteobacteria	Rothia mucilaginosa M1710	Actinobacteria	0	0	0	68.755
Advenella kashmirensis 3T5F	g-Proteobacteria	Brachybacterium alimentarium 341.9	Actinobacteria	0	0	0	72.283
Advenella kashmirensis 3T5F	g-Proteobacteria	Brevibacterium casei S18	Actinobacteria	0	0	0	72.574
Advenella kashmirensis 3T5F	g-Proteobacteria	Pseudomonas fragi 1E26	g-Proteobacteria	0	0	0	83.534
Advenella kashmirensis 3T5F	g-Proteobacteria	Enterobacter amnigenus CV9	g-Proteobacteria	0	0	0	78.611
Advenella kashmirensis 3T5F	g-Proteobacteria	Carnobacterium maltaromaticum 38b	Firmicutes	0	0	0	73.883
Advenella kashmirensis 3T5F	g-Proteobacteria	Glutamicibacter arilaitensis JB182	Actinobacteria	0	0	0	72.584
Advenella kashmirensis 3T5F	g-Proteobacteria	Psychrobacter namhaensis 1439	g-Proteobacteria	0	0	0	85.965
Advenella kashmirensis 3T5F	g-Proteobacteria	Micrococcus luteus Mu201	Actinobacteria	0	0	0	71.933
Advenella kashmirensis 3T5F	g-Proteobacteria	Pediococcus parvulus CIRM750	Actinobacteria	0	0	0	71.933
Advenella kashmirensis 3T5F	g-Proteobacteria	Exiguobacterium sibiricum NL255	Firmicutes	0	0	0	75.959
Advenella kashmirensis 3T5F	g-Proteobacteria	Acinetobacter johnsonii 3M05	g-Proteobacteria	0	0	0	82.834
Advenella kashmirensis 3T5F	g-Proteobacteria	Lactobacillus crustorum FH4	Firmicutes	0	0	0	68.954
Advenella kashmirensis 3T5F	g-Proteobacteria	Serratia marescens 448	g-Proteobacteria	0	0	0	84.274
Advenella kashmirensis 3T5F	g-Proteobacteria	Staphylococcus equorum BC15	Firmicutes	0	0	0	73.535
Advenella kashmirensis 3T5F	g-Proteobacteria	Stenotrophomonas maltophilia Pi1	g-Proteobacteria	0	0	0	82.453
Advenella kashmirensis 3T5F	g-Proteobacteria	Listeria monocytogenes str. Scott A	Firmicutes	0	0	0	74.363
Advenella kashmirensis 3T5F	g-Proteobacteria	Brachybacterium alimentarium 862.8	Actinobacteria	0	0	0	72.283
Advenella kashmirensis 3T5F	g-Proteobacteria	Brevibacterium casei CIP 102111	Actinobacteria	0	0	0	68.235
Advenella kashmirensis 3T5F	g-Proteobacteria	Brevibacterium linens 738.8	Actinobacteria	0	0	0	71.085
Advenella kashmirensis 3T5F	g-Proteobacteria	Mycobacterium vaccae CIP 105934	Actinobacteria	0	0	0	70.766
Advenella kashmirensis 3T5F	g-Proteobacteria	Proteus vulgaris 1M25	g-Proteobacteria	0	0	0	81.742
Advenella kashmirensis 3T5F	g-Proteobacteria	Leuconostoc mesenteroides CNRZ1283	Firmicutes	0	0	0	72.861
Advenella kashmirensis 3T5F	g-Proteobacteria	Brachybacterium alimentarium 947.11	Actinobacteria	0	0	0	72.283
Advenella kashmirensis 3T5F	g-Proteobacteria	Streptococcus macedonicus 679	Firmicutes	0	0	0	76.615
Advenella kashmirensis 3T5F	g-Proteobacteria	Staphylococcus warneri 1445	Firmicutes	0	0	0	75.991
Advenella kashmirensis 3T5F	g-Proteobacteria	Providencia rettgeri 947	g-Proteobacteria	0	0	0	82.066
Advenella kashmirensis 3T5F	g-Proteobacteria	Proteus hauseri 1M10	g-Proteobacteria	0	0	0	82.642
Advenella kashmirensis 3T5F	g-Proteobacteria	Vibrio litoralis B4	g-Proteobacteria	4	3545	0	81.568
Advenella kashmirensis 3T5F	g-Proteobacteria	Providencia alcalifaciens GM3	g-Proteobacteria	0	0	0	82.422
Brevundimonas diminuta 3F5N	a-Proteobacteria	Vibrio casei JB196	g-Proteobacteria	0	0	0	80.462
Brevundimonas diminuta 3F5N	a-Proteobacteria	Vibrio casei ws4539	g-Proteobacteria	0	0	0	80.578
Brevundimonas diminuta 3F5N	a-Proteobacteria	Lactococcus plantarum NCDO 1869	Firmicutes	0	0	0	76.267
Brevundimonas diminuta 3F5N	a-Proteobacteria	Glutamicibacter bergerei BW77	Actinobacteria	0	0	0	77.022
Brevundimonas diminuta 3F5N	a-Proteobacteria	Alkalibacterium kapii FAM208 38	Firmicutes	0	0	0	75.023
Brevundimonas diminuta 3F5N	a-Proteobacteria	Listeria fleischmannii subsp. fleischmannii LU2006-1	Firmicutes	0	0	0	75.879
Brevundimonas diminuta 3F5N	a-Proteobacteria	Alcaligenes sp. 2L29	g-Proteobacteria	0	0	0	79.765
Brevundimonas diminuta 3F5N	a-Proteobacteria	Paenibacillus lactis CIP 108827	Firmicutes	0	0	0	80.309
Brevundimonas diminuta 3F5N	a-Proteobacteria	Corynebacterium ammoniagenes ws2211	Actinobacteria	0	0	0	76.752
Brevundimonas diminuta 3F5N	a-Proteobacteria	Brachybacterium alimentarium 738.10	Actinobacteria	2	1449	0	76.147
Brevundimonas diminuta 3F5N	a-Proteobacteria	Halomonas sp. 1M45	g-Proteobacteria	0	0	0	79.075
Brevundimonas diminuta 3F5N	a-Proteobacteria	Brevibacterium linens BL2	Actinobacteria	0	0	0	74.226
Brevundimonas diminuta 3F5N	a-Proteobacteria	Pseudomonas lundensis PCAiD2.2	g-Proteobacteria	0	0	0	83.023
Brevundimonas diminuta 3F5N	a-Proteobacteria	Brevibacterium linens 876.7	Actinobacteria	0	0	0	74.226
Brevundimonas diminuta 3F5N	a-Proteobacteria	Brevibacterium linens 900.6	Actinobacteria	0	0	0	74.226
Brevundimonas diminuta 3F5N	a-Proteobacteria	Psychrobacter aquimaris ER15 174 BHI7	g-Proteobacteria	0	0	0	79.35
Brevundimonas diminuta 3F5N	a-Proteobacteria	Glutamicibacter sp. BW80	Actinobacteria	0	0	0	76.838
Brevundimonas diminuta 3F5N	a-Proteobacteria	Leuconostoc pseudomesenteroides MSE7	Firmicutes	0	0	0	74.885
Brevundimonas diminuta 3F5N	a-Proteobacteria	Pseudomonas fluorescens PCAiD6.2	g-Proteobacteria	0	0	0	76.448
Brevundimonas diminuta 3F5N	a-Proteobacteria	Bavariicoccus seileri ws4188	Firmicutes	0	0	0	74.64
Brevundimonas diminuta 3F5N	a-Proteobacteria	Ornithinibacillus bavariensis CIP 109287	Firmicutes	0	0	0	80.412
Brevundimonas diminuta 3F5N	a-Proteobacteria	Bacillus altitudinis 263	Firmicutes	0	0	0	80.054
Brevundimonas diminuta 3F5N	a-Proteobacteria	Brachybacterium alimentarium JB7	Actinobacteria	2	1449	0	76.147
Brevundimonas diminuta 3F5N	a-Proteobacteria	Kluyvera intermedia TL336A	g-Proteobacteria	0	0	0	75.213
Brevundimonas diminuta 3F5N	a-Proteobacteria	Corynebacterium flavescens Mu128	Actinobacteria	0	0	0	74.339
Brevundimonas diminuta 3F5N	a-Proteobacteria	Glutamicibacter arilaitensis Ca106	Actinobacteria	0	0	0	75.781
Brevundimonas diminuta 3F5N	a-Proteobacteria	Propionibacterium acidipropinicii LSPAc1	Actinobacteria	0	0	0	70.882
Brevundimonas diminuta 3F5N	a-Proteobacteria	Serratia rubidaea TA 26	g-Proteobacteria	0	0	0	75.88
Brevundimonas diminuta 3F5N	a-Proteobacteria	Psychrobacter celer 91	g-Proteobacteria	0	0	0	80.07
Brevundimonas diminuta 3F5N	a-Proteobacteria	Luteococcus japonicus LSP Lj1	Actinobacteria	0	0	0	75.123
Brevundimonas diminuta 3F5N	a-Proteobacteria	Brevibacterium linens 862.7	Actinobacteria	0	0	0	74.226
Brevundimonas diminuta 3F5N	a-Proteobacteria	Klebsiella oxytoca Pi20	g-Proteobacteria	0	0	0	76.476
Brevundimonas diminuta 3F5N	a-Proteobacteria	Chryseobacterium bovis Pi18	g-Proteobacteria	0	0	0	73.869
Brevundimonas diminuta 3F5N	a-Proteobacteria	Staphylococcus lentus Ca2	Firmicutes	0	0	0	76.796
Brevundimonas diminuta 3F5N	a-Proteobacteria	Halomonas venusta 3D7M	g-Proteobacteria	0	0	0	79.306
Brevundimonas diminuta 3F5N	a-Proteobacteria	Lactobacillus casei ATCC 334 (Lactobacillus paracasei ATCC 334)	Firmicutes	0	0	0	75.066
Brevundimonas diminuta 3F5N	a-Proteobacteria	Corynebacterium casei UCMA 3821	Actinobacteria	0	0	0	74.223
Brevundimonas diminuta 3F5N	a-Proteobacteria	Propionibacterium freudenreichii subsp. shermanii CIRM-BIA1	Actinobacteria	0	0	0	76.254
Brevundimonas diminuta 3F5N	a-Proteobacteria	Listeria monocytogenes serotype 4bV str. LS542	Firmicutes	0	0	0	76.118
Brevundimonas diminuta 3F5N	a-Proteobacteria	Acinetobacter genospecies 3 PCAiE6.10	g-Proteobacteria	0	0	0	80.821
Brevundimonas diminuta 3F5N	a-Proteobacteria	Kocuria varians Mu208	Actinobacteria	0	0	0	75.777
Brevundimonas diminuta 3F5N	a-Proteobacteria	Brachybacterium alimentarium CNRZ925	Actinobacteria	0	0	0	75.895
Brevundimonas diminuta 3F5N	a-Proteobacteria	Weissella cibaria 3386	Firmicutes	0	0	0	74.268
Brevundimonas diminuta 3F5N	a-Proteobacteria	Sphingobacterium faecium PCAiF2.5	g-Proteobacteria	0	0	0	69.675
Brevundimonas diminuta 3F5N	a-Proteobacteria	Brachybacterium alimentarium 908.11	Actinobacteria	2	1449	0	76.147
Brevundimonas diminuta 3F5N	a-Proteobacteria	Corynebacterium variabile	Actinobacteria	0	0	0	75.985
Brevundimonas diminuta 3F5N	a-Proteobacteria	Corynebacterium stationis CRBM6	Actinobacteria	0	0	0	66.797
Brevundimonas diminuta 3F5N	a-Proteobacteria	Brevibacterium linens 341.13	Actinobacteria	2	1449	0	74.226
Brevundimonas diminuta 3F5N	a-Proteobacteria	Morganella psychrotolerans 925	g-Proteobacteria	0	0	0	80.259
Brevundimonas diminuta 3F5N	a-Proteobacteria	Raoultella planticola 3M45	g-Proteobacteria	0	0	0	80.321
Brevundimonas diminuta 3F5N	a-Proteobacteria	Lactococcus raffinolactis NCDO617	Firmicutes	0	0	0	76.267
Brevundimonas diminuta 3F5N	a-Proteobacteria	Streptococcus infantarius subsp. infantarius 3AG	Firmicutes	0	0	0	74.912
Brevundimonas diminuta 3F5N	a-Proteobacteria	Citrococcus sp. ws2216	Actinobacteria	0	0	0	75.407
Brevundimonas diminuta 3F5N	a-Proteobacteria	Brevibacterium iodinum ATCC 49514	Actinobacteria	0	0	0	75.074
Brevundimonas diminuta 3F5N	a-Proteobacteria	Leucobacter komagatae 1L36	Actinobacteria	0	0	0	75.785
Brevundimonas diminuta 3F5N	a-Proteobacteria	Halomonas venusta 3A7M	g-Proteobacteria	0	0	0	79.306
Brevundimonas diminuta 3F5N	a-Proteobacteria	Microbacterium sp. JB110	Actinobacteria	0	0	0	75.389
Brevundimonas diminuta 3F5N	a-Proteobacteria	Pseudoalteromonas sp JB197	g-Proteobacteria	0	0	0	79.63
Brevundimonas diminuta 3F5N	a-Proteobacteria	Enterococcus malodoratus FAM208 55	Firmicutes	0	0	0	75.626
Brevundimonas diminuta 3F5N	a-Proteobacteria	Enterococcus hirae SB10	Firmicutes	0	0	0	74.567
Brevundimonas diminuta 3F5N	a-Proteobacteria	Halomonas sp JB37	g-Proteobacteria	0	0	0	78.844
Brevundimonas diminuta 3F5N	a-Proteobacteria	Macrococcus caseolyticus ATCC 13458	Firmicutes	0	0	0	79.731
Brevundimonas diminuta 3F5N	a-Proteobacteria	Brevibacterium linens 947.7	Actinobacteria	0	0	0	74.226
Brevundimonas diminuta 3F5N	a-Proteobacteria	Jeotgalicoccus psychrophilus CRBMD21	Firmicutes	0	0	0	77.862
Brevundimonas diminuta 3F5N	a-Proteobacteria	Brevibacterium linens JB5	Actinobacteria	2	1449	0	74.226
Brevundimonas diminuta 3F5N	a-Proteobacteria	Delftia acidovorans PCA12	g-Proteobacteria	0	0	0	78.32
Brevundimonas diminuta 3F5N	a-Proteobacteria	Pseudomonas pseudojaponica PCAi6.5	g-Proteobacteria	0	0	0	80.485
Brevundimonas diminuta 3F5N	a-Proteobacteria	Bacillus fordii CIP 108821	Firmicutes	0	0	0	78.415
Brevundimonas diminuta 3F5N	a-Proteobacteria	Leuconostoc citreum MSE2	Firmicutes	0	0	0	73.136
Brevundimonas diminuta 3F5N	a-Proteobacteria	Morganella morganii subsp. siboni 3A5A	g-Proteobacteria	0	0	0	80.374
Brevundimonas diminuta 3F5N	a-Proteobacteria	Brachybacterium alimentarium 962.10	Actinobacteria	1	810	0	76.147
Brevundimonas diminuta 3F5N	a-Proteobacteria	Lactococcus garvieae N201	Firmicutes	0	0	0	75.605
Brevundimonas diminuta 3F5N	a-Proteobacteria	Brevibacillus parabrevis CIP 110335	Firmicutes	0	0	0	79.376
Brevundimonas diminuta 3F5N	a-Proteobacteria	Brachybacterium alimentarium 876.9	Actinobacteria	2	1449	0	76.147
Brevundimonas diminuta 3F5N	a-Proteobacteria	Staphylococcus xylosus	Firmicutes	0	0	0	76.832
Brevundimonas diminuta 3F5N	a-Proteobacteria	Chryseobacterium joostei PCAiD6.3	g-Proteobacteria	0	0	0	74.884
Brevundimonas diminuta 3F5N	a-Proteobacteria	Microbacterium oxydans PCA1	Actinobacteria	0	0	0	74.46
Brevundimonas diminuta 3F5N	a-Proteobacteria	Exiguobacterium acetylicum 180	Firmicutes	0	0	0	76.027
Brevundimonas diminuta 3F5N	a-Proteobacteria	Corynebacterium variabile DSM 44702	Actinobacteria	0	0	0	75.506
Brevundimonas diminuta 3F5N	a-Proteobacteria	Enterococcus durans LMG10746	Firmicutes	0	0	0	74.242
Brevundimonas diminuta 3F5N	a-Proteobacteria	Stenotrophomonas rhizophila PCA13	g-Proteobacteria	0	0	0	80.023
Brevundimonas diminuta 3F5N	a-Proteobacteria	Chryseobacterium ginsengisoli M17	g-Proteobacteria	0	0	0	74.128
Brevundimonas diminuta 3F5N	a-Proteobacteria	Bacillus galactosidilyticus CIP 108417	Firmicutes	0	0	0	80.269
Brevundimonas diminuta 3F5N	a-Proteobacteria	Chryseobacterium vrystaatense PCAIF2.7	g-Proteobacteria	0	0	0	74.894
Brevundimonas diminuta 3F5N	a-Proteobacteria	Raoultella ornithinolytica TL332	g-Proteobacteria	0	0	0	77.577
Brevundimonas diminuta 3F5N	a-Proteobacteria	Glutamicibacter arilaitensis GMPA29	Actinobacteria	0	0	0	73.525
Brevundimonas diminuta 3F5N	a-Proteobacteria	Microbacterium gubbeenense DSM 15944	Actinobacteria	0	0	0	74.977
Brevundimonas diminuta 3F5N	a-Proteobacteria	Corynebacterium casei JB4	Actinobacteria	0	0	0	74.223
Brevundimonas diminuta 3F5N	a-Proteobacteria	Staphylococcus fleuretti CIP106114	Firmicutes	0	0	0	77.816
Brevundimonas diminuta 3F5N	a-Proteobacteria	Vagococcus fluvialis bH819	Firmicutes	0	0	0	77.298
Brevundimonas diminuta 3F5N	a-Proteobacteria	Providencia heimbachae GR4	g-Proteobacteria	0	0	0	79.466
Brevundimonas diminuta 3F5N	a-Proteobacteria	Pantoea agglomerans PCAiQ6.3	g-Proteobacteria	0	0	0	75.7
Brevundimonas diminuta 3F5N	a-Proteobacteria	Agrococcus casei LMG22410	Actinobacteria	0	0	0	73.571
Brevundimonas diminuta 3F5N	a-Proteobacteria	Psychrobacter faecalis H5	g-Proteobacteria	0	0	0	79.202
Brevundimonas diminuta 3F5N	a-Proteobacteria	Kocuria carniphila CRBM38	Actinobacteria	0	0	0	74.268
Brevundimonas diminuta 3F5N	a-Proteobacteria	Lactobacillus casei BD-II	Firmicutes	0	0	0	75.066
Brevundimonas diminuta 3F5N	a-Proteobacteria	Comamonas testosteroni NL2512	g-Proteobacteria	0	0	0	74.628
Brevundimonas diminuta 3F5N	a-Proteobacteria	Pseudomonas psychrophila 1E44	g-Proteobacteria	0	0	0	80.991
Brevundimonas diminuta 3F5N	a-Proteobacteria	Alcaligenes faecalis 2L10	g-Proteobacteria	0	0	0	80.485
Brevundimonas diminuta 3F5N	a-Proteobacteria	Staphylococcus caprae DSM 20608	Firmicutes	0	0	0	80.3
Brevundimonas diminuta 3F5N	a-Proteobacteria	Brachybacterium alimentarium 900.8	Actinobacteria	2	1449	0	76.147
Brevundimonas diminuta 3F5N	a-Proteobacteria	Streptococcus salivarius CJ181	Firmicutes	0	0	0	74.165
Brevundimonas diminuta 3F5N	a-Proteobacteria	Psychrobacter immobilis PG1	g-Proteobacteria	0	0	0	80.881
Brevundimonas diminuta 3F5N	a-Proteobacteria	Brevibacterium linens 962.8	Actinobacteria	0	0	0	74.226
Brevundimonas diminuta 3F5N	a-Proteobacteria	Glutamicibacter sp. BW78	Actinobacteria	0	0	0	76.077
Brevundimonas diminuta 3F5N	a-Proteobacteria	Bacillus pumilus M21	Firmicutes	0	0	0	80.011
Brevundimonas diminuta 3F5N	a-Proteobacteria	Streptococcus infantarius 11FA	Firmicutes	0	0	0	75.342
Brevundimonas diminuta 3F5N	a-Proteobacteria	Stenotrophomonas indologenes PCAi2.2	g-Proteobacteria	0	0	0	78.23
Brevundimonas diminuta 3F5N	a-Proteobacteria	Staphylococcus equorum BC9	Firmicutes	0	0	0	76.139
Brevundimonas diminuta 3F5N	a-Proteobacteria	Brevibacterium linens 908.7	Actinobacteria	0	0	0	74.226
Brevundimonas diminuta 3F5N	a-Proteobacteria	Brochothrix thermosphacta cH814	Firmicutes	0	0	0	78.291
Brevundimonas diminuta 3F5N	a-Proteobacteria	Leucobacter sp. ER15 166 BHI15	Actinobacteria	0	0	0	75.418
Brevundimonas diminuta 3F5N	a-Proteobacteria	Facklamia tabacinasalis FAM208 56	Firmicutes	0	0	0	78.286
Brevundimonas diminuta 3F5N	a-Proteobacteria	Enterococcus saccharominimus M17 423	Firmicutes	0	0	0	78.125
Brevundimonas diminuta 3F5N	a-Proteobacteria	Brevibacterium antiquum CNRZ918	Actinobacteria	0	0	0	74.612
Brevundimonas diminuta 3F5N	a-Proteobacteria	Sphingobacterium sp JB170	g-Proteobacteria	0	0	0	68.987
Brevundimonas diminuta 3F5N	a-Proteobacteria	Chryseobacterium shigense PCAiB2.3	g-Proteobacteria	0	0	0	74.186
Brevundimonas diminuta 3F5N	a-Proteobacteria	Vagococcus lutrae FAM208	Firmicutes	0	0	0	78.412
Brevundimonas diminuta 3F5N	a-Proteobacteria	Staphylococcus vitulinus Ma1	Firmicutes	0	0	0	79.922
Brevundimonas diminuta 3F5N	a-Proteobacteria	Lactobacillus brevis KB290	Firmicutes	0	0	0	72.14
Brevundimonas diminuta 3F5N	a-Proteobacteria	Psychrobacter sp JB193	g-Proteobacteria	0	0	0	80.649
Brevundimonas diminuta 3F5N	a-Proteobacteria	Halomonas venusta 3F2F	g-Proteobacteria	0	0	0	79.306
Brevundimonas diminuta 3F5N	a-Proteobacteria	Paenibacillus sp. 3M17	Firmicutes	0	0	0	80.627
Brevundimonas diminuta 3F5N	a-Proteobacteria	Serratia proteamaculans 1C2F	g-Proteobacteria	0	0	0	78.963
Brevundimonas diminuta 3F5N	a-Proteobacteria	Glutamicibacter arilaitensis Re117	Actinobacteria	0	0	0	76.563
Brevundimonas diminuta 3F5N	a-Proteobacteria	Lactobacillus brevis ATCC 367	Firmicutes	0	0	0	72.14
Brevundimonas diminuta 3F5N	a-Proteobacteria	Citrobacter freundii Pi15	g-Proteobacteria	0	0	0	79.335
Brevundimonas diminuta 3F5N	a-Proteobacteria	Propionibacterium thoenii LSPTH1	Actinobacteria	0	0	0	75.47
Brevundimonas diminuta 3F5N	a-Proteobacteria	Glutamicibacter arilaitensis 3M03	Actinobacteria	0	0	0	75.781
Brevundimonas diminuta 3F5N	a-Proteobacteria	Brevibacterium linens ATCC 9172	Actinobacteria	0	0	0	72.935
Brevundimonas diminuta 3F5N	a-Proteobacteria	Weissella cibaria 3385	Firmicutes	0	0	0	80.023
Brevundimonas diminuta 3F5N	a-Proteobacteria	Rothia mucilaginosa M1710	Actinobacteria	0	0	0	75.22
Brevundimonas diminuta 3F5N	a-Proteobacteria	Brachybacterium alimentarium 341.9	Actinobacteria	1	810	0	76.147
Brevundimonas diminuta 3F5N	a-Proteobacteria	Brevibacterium casei S18	Actinobacteria	0	0	0	76.932
Brevundimonas diminuta 3F5N	a-Proteobacteria	Pseudomonas fragi 1E26	g-Proteobacteria	0	0	0	81.124
Brevundimonas diminuta 3F5N	a-Proteobacteria	Enterobacter amnigenus CV9	g-Proteobacteria	0	0	0	74.652
Brevundimonas diminuta 3F5N	a-Proteobacteria	Carnobacterium maltaromaticum 38b	Firmicutes	0	0	0	75.023
Brevundimonas diminuta 3F5N	a-Proteobacteria	Glutamicibacter arilaitensis JB182	Actinobacteria	0	0	0	76.563
Brevundimonas diminuta 3F5N	a-Proteobacteria	Psychrobacter namhaensis 1439	g-Proteobacteria	0	0	0	80.07
Brevundimonas diminuta 3F5N	a-Proteobacteria	Micrococcus luteus Mu201	Actinobacteria	0	0	0	77.369
Brevundimonas diminuta 3F5N	a-Proteobacteria	Pediococcus parvulus CIRM750	Actinobacteria	0	0	0	77.369
Brevundimonas diminuta 3F5N	a-Proteobacteria	Exiguobacterium sibiricum NL255	Firmicutes	0	0	0	78.719
Brevundimonas diminuta 3F5N	a-Proteobacteria	Acinetobacter johnsonii 3M05	g-Proteobacteria	0	0	0	79.099
Brevundimonas diminuta 3F5N	a-Proteobacteria	Lactobacillus crustorum FH4	Firmicutes	0	0	0	74.616
Brevundimonas diminuta 3F5N	a-Proteobacteria	Serratia marescens 448	g-Proteobacteria	0	0	0	80.376
Brevundimonas diminuta 3F5N	a-Proteobacteria	Staphylococcus equorum BC15	Firmicutes	0	0	0	76.229
Brevundimonas diminuta 3F5N	a-Proteobacteria	Stenotrophomonas maltophilia Pi1	g-Proteobacteria	0	0	0	78.835
Brevundimonas diminuta 3F5N	a-Proteobacteria	Listeria monocytogenes str. Scott A	Firmicutes	0	0	0	76.05
Brevundimonas diminuta 3F5N	a-Proteobacteria	Brachybacterium alimentarium 862.8	Actinobacteria	2	1449	0	76.147
Brevundimonas diminuta 3F5N	a-Proteobacteria	Brevibacterium casei CIP 102111	Actinobacteria	0	0	0	72.942
Brevundimonas diminuta 3F5N	a-Proteobacteria	Brevibacterium linens 738.8	Actinobacteria	0	0	0	74.226
Brevundimonas diminuta 3F5N	a-Proteobacteria	Mycobacterium vaccae CIP 105934	Actinobacteria	0	0	0	76.471
Brevundimonas diminuta 3F5N	a-Proteobacteria	Proteus vulgaris 1M25	g-Proteobacteria	0	0	0	79.187
Brevundimonas diminuta 3F5N	a-Proteobacteria	Leuconostoc mesenteroides CNRZ1283	Firmicutes	0	0	0	72.719
Brevundimonas diminuta 3F5N	a-Proteobacteria	Brachybacterium alimentarium 947.11	Actinobacteria	2	1449	0	76.125
Brevundimonas diminuta 3F5N	a-Proteobacteria	Streptococcus macedonicus 679	Firmicutes	0	0	0	75.775
Brevundimonas diminuta 3F5N	a-Proteobacteria	Staphylococcus warneri 1445	Firmicutes	0	0	0	80.062
Brevundimonas diminuta 3F5N	a-Proteobacteria	Providencia rettgeri 947	g-Proteobacteria	0	0	0	79.466
Brevundimonas diminuta 3F5N	a-Proteobacteria	Proteus hauseri 1M10	g-Proteobacteria	0	0	0	79.93
Brevundimonas diminuta 3F5N	a-Proteobacteria	Vibrio litoralis B4	g-Proteobacteria	0	0	0	80.462
Brevundimonas diminuta 3F5N	a-Proteobacteria	Providencia alcalifaciens GM3	g-Proteobacteria	0	0	0	78.287
Vibrio casei JB196	g-Proteobacteria	Lactococcus plantarum NCDO 1869	Firmicutes	0	0	0	76.471
Vibrio casei JB196	g-Proteobacteria	Glutamicibacter bergerei BW77	Actinobacteria	0	0	0	78.418
Vibrio casei JB196	g-Proteobacteria	Alkalibacterium kapii FAM208 38	Firmicutes	0	0	0	78.197
Vibrio casei JB196	g-Proteobacteria	Listeria fleischmannii subsp. fleischmannii LU2006-1	Firmicutes	0	0	0	79.828
Vibrio casei JB196	g-Proteobacteria	Alcaligenes sp. 2L29	g-Proteobacteria	0	0	0	83.079
Vibrio casei JB196	g-Proteobacteria	Paenibacillus lactis CIP 108827	Firmicutes	0	0	0	79.947
Vibrio casei JB196	g-Proteobacteria	Corynebacterium ammoniagenes ws2211	Actinobacteria	0	0	0	77.841
Vibrio casei JB196	g-Proteobacteria	Brachybacterium alimentarium 738.10	Actinobacteria	0	0	0	77.902
Vibrio casei JB196	g-Proteobacteria	Halomonas sp. 1M45	g-Proteobacteria	8	7317	0	87.213
Vibrio casei JB196	g-Proteobacteria	Brevibacterium linens BL2	Actinobacteria	0	0	0	77.577
Vibrio casei JB196	g-Proteobacteria	Pseudomonas lundensis PCAiD2.2	g-Proteobacteria	0	0	0	84.16
Vibrio casei JB196	g-Proteobacteria	Brevibacterium linens 876.7	Actinobacteria	0	0	0	77.663
Vibrio casei JB196	g-Proteobacteria	Brevibacterium linens 900.6	Actinobacteria	0	0	0	77.577
Vibrio casei JB196	g-Proteobacteria	Psychrobacter aquimaris ER15 174 BHI7	g-Proteobacteria	0	0	0	84.919
Vibrio casei JB196	g-Proteobacteria	Glutamicibacter sp. BW80	Actinobacteria	0	0	0	78.504
Vibrio casei JB196	g-Proteobacteria	Leuconostoc pseudomesenteroides MSE7	Firmicutes	0	0	0	75.727
Vibrio casei JB196	g-Proteobacteria	Pseudomonas fluorescens PCAiD6.2	g-Proteobacteria	0	0	0	86.034
Vibrio casei JB196	g-Proteobacteria	Bavariicoccus seileri ws4188	Firmicutes	0	0	0	79.075
Vibrio casei JB196	g-Proteobacteria	Ornithinibacillus bavariensis CIP 109287	Firmicutes	0	0	0	80.186
Vibrio casei JB196	g-Proteobacteria	Bacillus altitudinis 263	Firmicutes	0	0	0	80.505
Vibrio casei JB196	g-Proteobacteria	Brachybacterium alimentarium JB7	Actinobacteria	0	0	0	77.902
Vibrio casei JB196	g-Proteobacteria	Kluyvera intermedia TL336A	g-Proteobacteria	0	0	0	91.458
Vibrio casei JB196	g-Proteobacteria	Corynebacterium flavescens Mu128	Actinobacteria	0	0	0	77.207
Vibrio casei JB196	g-Proteobacteria	Glutamicibacter arilaitensis Ca106	Actinobacteria	0	0	0	79.439
Vibrio casei JB196	g-Proteobacteria	Propionibacterium acidipropinicii LSPAc1	Actinobacteria	0	0	0	75.621
Vibrio casei JB196	g-Proteobacteria	Serratia rubidaea TA 26	g-Proteobacteria	0	0	0	86.434
Vibrio casei JB196	g-Proteobacteria	Psychrobacter celer 91	g-Proteobacteria	0	0	0	85.998
Vibrio casei JB196	g-Proteobacteria	Luteococcus japonicus LSP Lj1	Actinobacteria	0	0	0	77.816
Vibrio casei JB196	g-Proteobacteria	Brevibacterium linens 862.7	Actinobacteria	0	0	0	77.577
Vibrio casei JB196	g-Proteobacteria	Klebsiella oxytoca Pi20	g-Proteobacteria	0	0	0	91.121
Vibrio casei JB196	g-Proteobacteria	Chryseobacterium bovis Pi18	g-Proteobacteria	0	0	0	73.001
Vibrio casei JB196	g-Proteobacteria	Staphylococcus lentus Ca2	Firmicutes	0	0	0	79.813
Vibrio casei JB196	g-Proteobacteria	Halomonas venusta 3D7M	g-Proteobacteria	0	0	0	87.921
Vibrio casei JB196	g-Proteobacteria	Lactobacillus casei ATCC 334 (Lactobacillus paracasei ATCC 334)	Firmicutes	0	0	0	79.397
Vibrio casei JB196	g-Proteobacteria	Corynebacterium casei UCMA 3821	Actinobacteria	0	0	0	78.332
Vibrio casei JB196	g-Proteobacteria	Propionibacterium freudenreichii subsp. shermanii CIRM-BIA1	Actinobacteria	0	0	0	77.367
Vibrio casei JB196	g-Proteobacteria	Listeria monocytogenes serotype 4bV str. LS542	Firmicutes	0	0	0	80.086
Vibrio casei JB196	g-Proteobacteria	Acinetobacter genospecies 3 PCAiE6.10	g-Proteobacteria	0	0	0	83.46
Vibrio casei JB196	g-Proteobacteria	Kocuria varians Mu208	Actinobacteria	0	0	0	77.234
Vibrio casei JB196	g-Proteobacteria	Brachybacterium alimentarium CNRZ925	Actinobacteria	0	0	0	77.644
Vibrio casei JB196	g-Proteobacteria	Weissella cibaria 3386	Firmicutes	0	0	0	75.993
Vibrio casei JB196	g-Proteobacteria	Sphingobacterium faecium PCAiF2.5	g-Proteobacteria	0	0	0	73.924
Vibrio casei JB196	g-Proteobacteria	Brachybacterium alimentarium 908.11	Actinobacteria	0	0	0	77.902
Vibrio casei JB196	g-Proteobacteria	Corynebacterium variabile	Actinobacteria	0	0	0	78.762
Vibrio casei JB196	g-Proteobacteria	Corynebacterium stationis CRBM6	Actinobacteria	0	0	0	68.057
Vibrio casei JB196	g-Proteobacteria	Brevibacterium linens 341.13	Actinobacteria	0	0	0	77.577
Vibrio casei JB196	g-Proteobacteria	Morganella psychrotolerans 925	g-Proteobacteria	0	0	0	91.892
Vibrio casei JB196	g-Proteobacteria	Raoultella planticola 3M45	g-Proteobacteria	0	0	0	91.7
Vibrio casei JB196	g-Proteobacteria	Lactococcus raffinolactis NCDO617	Firmicutes	0	0	0	76.471
Vibrio casei JB196	g-Proteobacteria	Streptococcus infantarius subsp. infantarius 3AG	Firmicutes	0	0	0	76.667
Vibrio casei JB196	g-Proteobacteria	Citrococcus sp. ws2216	Actinobacteria	0	0	0	79.16
Vibrio casei JB196	g-Proteobacteria	Brevibacterium iodinum ATCC 49514	Actinobacteria	0	0	0	76.836
Vibrio casei JB196	g-Proteobacteria	Leucobacter komagatae 1L36	Actinobacteria	0	0	0	76.996
Vibrio casei JB196	g-Proteobacteria	Halomonas venusta 3A7M	g-Proteobacteria	0	0	0	87.921
Vibrio casei JB196	g-Proteobacteria	Microbacterium sp. JB110	Actinobacteria	0	0	0	78.332
Vibrio casei JB196	g-Proteobacteria	Pseudoalteromonas sp JB197	g-Proteobacteria	19	53841	0	90.509
Vibrio casei JB196	g-Proteobacteria	Enterococcus malodoratus FAM208 55	Firmicutes	0	0	0	80
Vibrio casei JB196	g-Proteobacteria	Enterococcus hirae SB10	Firmicutes	0	0	0	78.555
Vibrio casei JB196	g-Proteobacteria	Halomonas sp JB37	g-Proteobacteria	12	10125	0	88.007
Vibrio casei JB196	g-Proteobacteria	Macrococcus caseolyticus ATCC 13458	Firmicutes	0	0	0	80.31
Vibrio casei JB196	g-Proteobacteria	Brevibacterium linens 947.7	Actinobacteria	0	0	0	77.577
Vibrio casei JB196	g-Proteobacteria	Jeotgalicoccus psychrophilus CRBMD21	Firmicutes	0	0	0	76.836
Vibrio casei JB196	g-Proteobacteria	Brevibacterium linens JB5	Actinobacteria	0	0	0	77.663
Vibrio casei JB196	g-Proteobacteria	Delftia acidovorans PCA12	g-Proteobacteria	0	0	0	78.128
Vibrio casei JB196	g-Proteobacteria	Pseudomonas pseudojaponica PCAi6.5	g-Proteobacteria	0	0	0	83.697
Vibrio casei JB196	g-Proteobacteria	Bacillus fordii CIP 108821	Firmicutes	0	0	0	78.947
Vibrio casei JB196	g-Proteobacteria	Leuconostoc citreum MSE2	Firmicutes	0	0	0	73.209
Vibrio casei JB196	g-Proteobacteria	Morganella morganii subsp. siboni 3A5A	g-Proteobacteria	0	0	0	92.236
Vibrio casei JB196	g-Proteobacteria	Brachybacterium alimentarium 962.10	Actinobacteria	0	0	0	77.902
Vibrio casei JB196	g-Proteobacteria	Lactococcus garvieae N201	Firmicutes	0	0	0	73.683
Vibrio casei JB196	g-Proteobacteria	Brevibacillus parabrevis CIP 110335	Firmicutes	0	0	0	77.835
Vibrio casei JB196	g-Proteobacteria	Brachybacterium alimentarium 876.9	Actinobacteria	0	0	0	77.902
Vibrio casei JB196	g-Proteobacteria	Staphylococcus xylosus	Firmicutes	0	0	0	79.579
Vibrio casei JB196	g-Proteobacteria	Chryseobacterium joostei PCAiD6.3	g-Proteobacteria	0	0	0	73.087
Vibrio casei JB196	g-Proteobacteria	Microbacterium oxydans PCA1	Actinobacteria	0	0	0	74.974
Vibrio casei JB196	g-Proteobacteria	Exiguobacterium acetylicum 180	Firmicutes	0	0	0	79.585
Vibrio casei JB196	g-Proteobacteria	Corynebacterium variabile DSM 44702	Actinobacteria	0	0	0	77.988
Vibrio casei JB196	g-Proteobacteria	Enterococcus durans LMG10746	Firmicutes	0	0	0	79.361
Vibrio casei JB196	g-Proteobacteria	Stenotrophomonas rhizophila PCA13	g-Proteobacteria	0	0	0	83.549
Vibrio casei JB196	g-Proteobacteria	Chryseobacterium ginsengisoli M17	g-Proteobacteria	0	0	0	70.021
Vibrio casei JB196	g-Proteobacteria	Bacillus galactosidilyticus CIP 108417	Firmicutes	0	0	0	78.687
Vibrio casei JB196	g-Proteobacteria	Chryseobacterium vrystaatense PCAIF2.7	g-Proteobacteria	0	0	0	76.648
Vibrio casei JB196	g-Proteobacteria	Raoultella ornithinolytica TL332	g-Proteobacteria	0	0	0	86.432
Vibrio casei JB196	g-Proteobacteria	Glutamicibacter arilaitensis GMPA29	Actinobacteria	0	0	0	79.167
Vibrio casei JB196	g-Proteobacteria	Microbacterium gubbeenense DSM 15944	Actinobacteria	0	0	0	77.816
Vibrio casei JB196	g-Proteobacteria	Corynebacterium casei JB4	Actinobacteria	0	0	0	78.332
Vibrio casei JB196	g-Proteobacteria	Staphylococcus fleuretti CIP106114	Firmicutes	0	0	0	79.204
Vibrio casei JB196	g-Proteobacteria	Vagococcus fluvialis bH819	Firmicutes	0	0	0	74.974
Vibrio casei JB196	g-Proteobacteria	Providencia heimbachae GR4	g-Proteobacteria	0	0	0	91.869
Vibrio casei JB196	g-Proteobacteria	Pantoea agglomerans PCAiQ6.3	g-Proteobacteria	0	0	0	91.717
Vibrio casei JB196	g-Proteobacteria	Agrococcus casei LMG22410	Actinobacteria	0	0	0	78.996
Vibrio casei JB196	g-Proteobacteria	Psychrobacter faecalis H5	g-Proteobacteria	0	0	0	85.006
Vibrio casei JB196	g-Proteobacteria	Kocuria carniphila CRBM38	Actinobacteria	0	0	0	75.993
Vibrio casei JB196	g-Proteobacteria	Lactobacillus casei BD-II	Firmicutes	0	0	0	79.397
Vibrio casei JB196	g-Proteobacteria	Comamonas testosteroni NL2512	g-Proteobacteria	0	0	0	80.362
Vibrio casei JB196	g-Proteobacteria	Pseudomonas psychrophila 1E44	g-Proteobacteria	0	0	0	87.149
Vibrio casei JB196	g-Proteobacteria	Alcaligenes faecalis 2L10	g-Proteobacteria	0	0	0	82.429
Vibrio casei JB196	g-Proteobacteria	Staphylococcus caprae DSM 20608	Firmicutes	0	0	0	80.551
Vibrio casei JB196	g-Proteobacteria	Brachybacterium alimentarium 900.8	Actinobacteria	0	0	0	77.902
Vibrio casei JB196	g-Proteobacteria	Streptococcus salivarius CJ181	Firmicutes	0	0	0	76.274
Vibrio casei JB196	g-Proteobacteria	Psychrobacter immobilis PG1	g-Proteobacteria	0	0	0	85.307
Vibrio casei JB196	g-Proteobacteria	Brevibacterium linens 962.8	Actinobacteria	0	0	0	77.491
Vibrio casei JB196	g-Proteobacteria	Glutamicibacter sp. BW78	Actinobacteria	0	0	0	78.074
Vibrio casei JB196	g-Proteobacteria	Bacillus pumilus M21	Firmicutes	0	0	0	78.924
Vibrio casei JB196	g-Proteobacteria	Streptococcus infantarius 11FA	Firmicutes	0	0	0	76.37
Vibrio casei JB196	g-Proteobacteria	Stenotrophomonas indologenes PCAi2.2	g-Proteobacteria	0	0	0	79.673
Vibrio casei JB196	g-Proteobacteria	Staphylococcus equorum BC9	Firmicutes	0	0	0	80.293
Vibrio casei JB196	g-Proteobacteria	Brevibacterium linens 908.7	Actinobacteria	0	0	0	77.577
Vibrio casei JB196	g-Proteobacteria	Brochothrix thermosphacta cH814	Firmicutes	0	0	0	77.088
Vibrio casei JB196	g-Proteobacteria	Leucobacter sp. ER15 166 BHI15	Actinobacteria	0	0	0	75.855
Vibrio casei JB196	g-Proteobacteria	Facklamia tabacinasalis FAM208 56	Firmicutes	0	0	0	77.143
Vibrio casei JB196	g-Proteobacteria	Enterococcus saccharominimus M17 423	Firmicutes	0	0	0	75.887
Vibrio casei JB196	g-Proteobacteria	Brevibacterium antiquum CNRZ918	Actinobacteria	0	0	0	77.062
Vibrio casei JB196	g-Proteobacteria	Sphingobacterium sp JB170	g-Proteobacteria	0	0	0	74.182
Vibrio casei JB196	g-Proteobacteria	Chryseobacterium shigense PCAiB2.3	g-Proteobacteria	0	0	0	73.173
Vibrio casei JB196	g-Proteobacteria	Vagococcus lutrae FAM208	Firmicutes	0	0	0	78.355
Vibrio casei JB196	g-Proteobacteria	Staphylococcus vitulinus Ma1	Firmicutes	0	0	0	79.947
Vibrio casei JB196	g-Proteobacteria	Lactobacillus brevis KB290	Firmicutes	0	0	0	78.017
Vibrio casei JB196	g-Proteobacteria	Psychrobacter sp JB193	g-Proteobacteria	0	0	0	85.739
Vibrio casei JB196	g-Proteobacteria	Halomonas venusta 3F2F	g-Proteobacteria	0	0	0	87.052
Vibrio casei JB196	g-Proteobacteria	Paenibacillus sp. 3M17	Firmicutes	0	0	0	78.819
Vibrio casei JB196	g-Proteobacteria	Serratia proteamaculans 1C2F	g-Proteobacteria	0	0	0	91.111
Vibrio casei JB196	g-Proteobacteria	Glutamicibacter arilaitensis Re117	Actinobacteria	0	0	0	78.59
Vibrio casei JB196	g-Proteobacteria	Lactobacillus brevis ATCC 367	Firmicutes	0	0	0	78.017
Vibrio casei JB196	g-Proteobacteria	Citrobacter freundii Pi15	g-Proteobacteria	0	0	0	88.811
Vibrio casei JB196	g-Proteobacteria	Propionibacterium thoenii LSPTH1	Actinobacteria	0	0	0	77.22
Vibrio casei JB196	g-Proteobacteria	Glutamicibacter arilaitensis 3M03	Actinobacteria	0	0	0	79.439
Vibrio casei JB196	g-Proteobacteria	Brevibacterium linens ATCC 9172	Actinobacteria	0	0	0	76.082
Vibrio casei JB196	g-Proteobacteria	Weissella cibaria 3385	Firmicutes	0	0	0	81.654
Vibrio casei JB196	g-Proteobacteria	Rothia mucilaginosa M1710	Actinobacteria	0	0	0	76.119
Vibrio casei JB196	g-Proteobacteria	Brachybacterium alimentarium 341.9	Actinobacteria	0	0	0	77.902
Vibrio casei JB196	g-Proteobacteria	Brevibacterium casei S18	Actinobacteria	0	0	0	77.472
Vibrio casei JB196	g-Proteobacteria	Pseudomonas fragi 1E26	g-Proteobacteria	0	0	0	87.55
Vibrio casei JB196	g-Proteobacteria	Enterobacter amnigenus CV9	g-Proteobacteria	0	0	0	91.372
Vibrio casei JB196	g-Proteobacteria	Carnobacterium maltaromaticum 38b	Firmicutes	0	0	0	79.587
Vibrio casei JB196	g-Proteobacteria	Glutamicibacter arilaitensis JB182	Actinobacteria	0	0	0	78.59
Vibrio casei JB196	g-Proteobacteria	Psychrobacter namhaensis 1439	g-Proteobacteria	0	0	0	85.698
Vibrio casei JB196	g-Proteobacteria	Micrococcus luteus Mu201	Actinobacteria	0	0	0	78.512
Vibrio casei JB196	g-Proteobacteria	Pediococcus parvulus CIRM750	Actinobacteria	0	0	0	78.512
Vibrio casei JB196	g-Proteobacteria	Exiguobacterium sibiricum NL255	Firmicutes	0	0	0	77.591
Vibrio casei JB196	g-Proteobacteria	Acinetobacter johnsonii 3M05	g-Proteobacteria	0	0	0	84.065
Vibrio casei JB196	g-Proteobacteria	Lactobacillus crustorum FH4	Firmicutes	0	0	0	76.874
Vibrio casei JB196	g-Proteobacteria	Serratia marescens 448	g-Proteobacteria	0	0	0	91.935
Vibrio casei JB196	g-Proteobacteria	Staphylococcus equorum BC15	Firmicutes	0	0	0	80.551
Vibrio casei JB196	g-Proteobacteria	Stenotrophomonas maltophilia Pi1	g-Proteobacteria	0	0	0	81.068
Vibrio casei JB196	g-Proteobacteria	Listeria monocytogenes str. Scott A	Firmicutes	0	0	0	80.017
Vibrio casei JB196	g-Proteobacteria	Brachybacterium alimentarium 862.8	Actinobacteria	0	0	0	77.902
Vibrio casei JB196	g-Proteobacteria	Brevibacterium casei CIP 102111	Actinobacteria	0	0	0	75.98
Vibrio casei JB196	g-Proteobacteria	Brevibacterium linens 738.8	Actinobacteria	0	0	0	77.577
Vibrio casei JB196	g-Proteobacteria	Mycobacterium vaccae CIP 105934	Actinobacteria	0	0	0	78.093
Vibrio casei JB196	g-Proteobacteria	Proteus vulgaris 1M25	g-Proteobacteria	0	0	0	91.268
Vibrio casei JB196	g-Proteobacteria	Leuconostoc mesenteroides CNRZ1283	Firmicutes	0	0	0	78.891
Vibrio casei JB196	g-Proteobacteria	Brachybacterium alimentarium 947.11	Actinobacteria	0	0	0	77.902
Vibrio casei JB196	g-Proteobacteria	Streptococcus macedonicus 679	Firmicutes	0	0	0	75.077
Vibrio casei JB196	g-Proteobacteria	Staphylococcus warneri 1445	Firmicutes	0	0	0	76.675
Vibrio casei JB196	g-Proteobacteria	Providencia rettgeri 947	g-Proteobacteria	0	0	0	91.468
Vibrio casei JB196	g-Proteobacteria	Proteus hauseri 1M10	g-Proteobacteria	0	0	0	91.436
Vibrio casei JB196	g-Proteobacteria	Providencia alcalifaciens GM3	g-Proteobacteria	0	0	0	91.285
Vibrio casei ws4539	g-Proteobacteria	Lactococcus plantarum NCDO 1869	Firmicutes	0	0	0	76.362
Vibrio casei ws4539	g-Proteobacteria	Glutamicibacter bergerei BW77	Actinobacteria	0	0	0	78.332
Vibrio casei ws4539	g-Proteobacteria	Alkalibacterium kapii FAM208 38	Firmicutes	0	0	0	78.302
Vibrio casei ws4539	g-Proteobacteria	Listeria fleischmannii subsp. fleischmannii LU2006-1	Firmicutes	0	0	0	79.741
Vibrio casei ws4539	g-Proteobacteria	Alcaligenes sp. 2L29	g-Proteobacteria	0	0	0	82.961
Vibrio casei ws4539	g-Proteobacteria	Paenibacillus lactis CIP 108827	Firmicutes	0	0	0	79.813
Vibrio casei ws4539	g-Proteobacteria	Corynebacterium ammoniagenes ws2211	Actinobacteria	0	0	0	77.727
Vibrio casei ws4539	g-Proteobacteria	Brachybacterium alimentarium 738.10	Actinobacteria	0	0	0	77.73
Vibrio casei ws4539	g-Proteobacteria	Halomonas sp. 1M45	g-Proteobacteria	0	0	0	87.213
Vibrio casei ws4539	g-Proteobacteria	Brevibacterium linens BL2	Actinobacteria	0	0	0	77.491
Vibrio casei ws4539	g-Proteobacteria	Pseudomonas lundensis PCAiD2.2	g-Proteobacteria	0	0	0	84.351
Vibrio casei ws4539	g-Proteobacteria	Brevibacterium linens 876.7	Actinobacteria	0	0	0	77.663
Vibrio casei ws4539	g-Proteobacteria	Brevibacterium linens 900.6	Actinobacteria	0	0	0	77.491
Vibrio casei ws4539	g-Proteobacteria	Psychrobacter aquimaris ER15 174 BHI7	g-Proteobacteria	2	2220	0	85.035
Vibrio casei ws4539	g-Proteobacteria	Glutamicibacter sp. BW80	Actinobacteria	0	0	0	78.418
Vibrio casei ws4539	g-Proteobacteria	Leuconostoc pseudomesenteroides MSE7	Firmicutes	0	0	0	75.426
Vibrio casei ws4539	g-Proteobacteria	Pseudomonas fluorescens PCAiD6.2	g-Proteobacteria	0	0	0	86.207
Vibrio casei ws4539	g-Proteobacteria	Bavariicoccus seileri ws4188	Firmicutes	0	0	0	78.728
Vibrio casei ws4539	g-Proteobacteria	Ornithinibacillus bavariensis CIP 109287	Firmicutes	0	0	0	80.053
Vibrio casei ws4539	g-Proteobacteria	Bacillus altitudinis 263	Firmicutes	0	0	0	80.365
Vibrio casei ws4539	g-Proteobacteria	Brachybacterium alimentarium JB7	Actinobacteria	0	0	0	77.73
Vibrio casei ws4539	g-Proteobacteria	Kluyvera intermedia TL336A	g-Proteobacteria	0	0	0	91.372
Vibrio casei ws4539	g-Proteobacteria	Corynebacterium flavescens Mu128	Actinobacteria	0	0	0	77.121
Vibrio casei ws4539	g-Proteobacteria	Glutamicibacter arilaitensis Ca106	Actinobacteria	0	0	0	79.439
Vibrio casei ws4539	g-Proteobacteria	Propionibacterium acidipropinicii LSPAc1	Actinobacteria	0	0	0	75.847
Vibrio casei ws4539	g-Proteobacteria	Serratia rubidaea TA 26	g-Proteobacteria	0	0	0	86.57
Vibrio casei ws4539	g-Proteobacteria	Psychrobacter celer 91	g-Proteobacteria	0	0	0	85.998
Vibrio casei ws4539	g-Proteobacteria	Luteococcus japonicus LSP Lj1	Actinobacteria	0	0	0	77.816
Vibrio casei ws4539	g-Proteobacteria	Brevibacterium linens 862.7	Actinobacteria	0	0	0	77.491
Vibrio casei ws4539	g-Proteobacteria	Klebsiella oxytoca Pi20	g-Proteobacteria	0	0	0	91.034
Vibrio casei ws4539	g-Proteobacteria	Chryseobacterium bovis Pi18	g-Proteobacteria	0	0	0	73.087
Vibrio casei ws4539	g-Proteobacteria	Staphylococcus lentus Ca2	Firmicutes	0	0	0	79.813
Vibrio casei ws4539	g-Proteobacteria	Halomonas venusta 3D7M	g-Proteobacteria	0	0	0	87.921
Vibrio casei ws4539	g-Proteobacteria	Lactobacillus casei ATCC 334 (Lactobacillus paracasei ATCC 334)	Firmicutes	0	0	0	79.052
Vibrio casei ws4539	g-Proteobacteria	Corynebacterium casei UCMA 3821	Actinobacteria	0	0	0	78.246
Vibrio casei ws4539	g-Proteobacteria	Propionibacterium freudenreichii subsp. shermanii CIRM-BIA1	Actinobacteria	0	0	0	77.194
Vibrio casei ws4539	g-Proteobacteria	Listeria monocytogenes serotype 4bV str. LS542	Firmicutes	0	0	0	80.172
Vibrio casei ws4539	g-Proteobacteria	Acinetobacter genospecies 3 PCAiE6.10	g-Proteobacteria	0	0	0	83.628
Vibrio casei ws4539	g-Proteobacteria	Kocuria varians Mu208	Actinobacteria	0	0	0	77.062
Vibrio casei ws4539	g-Proteobacteria	Brachybacterium alimentarium CNRZ925	Actinobacteria	0	0	0	77.472
Vibrio casei ws4539	g-Proteobacteria	Weissella cibaria 3386	Firmicutes	0	0	0	75.993
Vibrio casei ws4539	g-Proteobacteria	Sphingobacterium faecium PCAiF2.5	g-Proteobacteria	0	0	0	73.838
Vibrio casei ws4539	g-Proteobacteria	Brachybacterium alimentarium 908.11	Actinobacteria	0	0	0	77.73
Vibrio casei ws4539	g-Proteobacteria	Corynebacterium variabile	Actinobacteria	0	0	0	78.848
Vibrio casei ws4539	g-Proteobacteria	Corynebacterium stationis CRBM6	Actinobacteria	0	0	0	68.057
Vibrio casei ws4539	g-Proteobacteria	Brevibacterium linens 341.13	Actinobacteria	0	0	0	77.491
Vibrio casei ws4539	g-Proteobacteria	Morganella psychrotolerans 925	g-Proteobacteria	0	0	0	92.009
Vibrio casei ws4539	g-Proteobacteria	Raoultella planticola 3M45	g-Proteobacteria	0	0	0	91.566
Vibrio casei ws4539	g-Proteobacteria	Lactococcus raffinolactis NCDO617	Firmicutes	0	0	0	76.362
Vibrio casei ws4539	g-Proteobacteria	Streptococcus infantarius subsp. infantarius 3AG	Firmicutes	0	0	0	76.491
Vibrio casei ws4539	g-Proteobacteria	Citrococcus sp. ws2216	Actinobacteria	0	0	0	79.074
Vibrio casei ws4539	g-Proteobacteria	Brevibacterium iodinum ATCC 49514	Actinobacteria	0	0	0	76.836
Vibrio casei ws4539	g-Proteobacteria	Leucobacter komagatae 1L36	Actinobacteria	0	0	0	76.996
Vibrio casei ws4539	g-Proteobacteria	Halomonas venusta 3A7M	g-Proteobacteria	0	0	0	87.921
Vibrio casei ws4539	g-Proteobacteria	Microbacterium sp. JB110	Actinobacteria	0	0	0	78.246
Vibrio casei ws4539	g-Proteobacteria	Pseudoalteromonas sp JB197	g-Proteobacteria	1	2988	0	90.336
Vibrio casei ws4539	g-Proteobacteria	Enterococcus malodoratus FAM208 55	Firmicutes	0	0	0	79.769
Vibrio casei ws4539	g-Proteobacteria	Enterococcus hirae SB10	Firmicutes	0	0	0	78.208
Vibrio casei ws4539	g-Proteobacteria	Halomonas sp JB37	g-Proteobacteria	0	0	0	87.921
Vibrio casei ws4539	g-Proteobacteria	Macrococcus caseolyticus ATCC 13458	Firmicutes	0	0	0	80.396
Vibrio casei ws4539	g-Proteobacteria	Brevibacterium linens 947.7	Actinobacteria	0	0	0	77.491
Vibrio casei ws4539	g-Proteobacteria	Jeotgalicoccus psychrophilus CRBMD21	Firmicutes	0	0	0	77.037
Vibrio casei ws4539	g-Proteobacteria	Brevibacterium linens JB5	Actinobacteria	0	0	0	77.577
Vibrio casei ws4539	g-Proteobacteria	Delftia acidovorans PCA12	g-Proteobacteria	0	0	0	77.92
Vibrio casei ws4539	g-Proteobacteria	Pseudomonas pseudojaponica PCAi6.5	g-Proteobacteria	0	0	0	83.593
Vibrio casei ws4539	g-Proteobacteria	Bacillus fordii CIP 108821	Firmicutes	0	0	0	79.123
Vibrio casei ws4539	g-Proteobacteria	Leuconostoc citreum MSE2	Firmicutes	0	0	0	73.004
Vibrio casei ws4539	g-Proteobacteria	Morganella morganii subsp. siboni 3A5A	g-Proteobacteria	0	0	0	92.102
Vibrio casei ws4539	g-Proteobacteria	Brachybacterium alimentarium 962.10	Actinobacteria	0	0	0	77.73
Vibrio casei ws4539	g-Proteobacteria	Lactococcus garvieae N201	Firmicutes	0	0	0	73.583
Vibrio casei ws4539	g-Proteobacteria	Brevibacillus parabrevis CIP 110335	Firmicutes	0	0	0	77.835
Vibrio casei ws4539	g-Proteobacteria	Brachybacterium alimentarium 876.9	Actinobacteria	0	0	0	77.73
Vibrio casei ws4539	g-Proteobacteria	Staphylococcus xylosus	Firmicutes	0	0	0	79.474
Vibrio casei ws4539	g-Proteobacteria	Chryseobacterium joostei PCAiD6.3	g-Proteobacteria	0	0	0	73.173
Vibrio casei ws4539	g-Proteobacteria	Microbacterium oxydans PCA1	Actinobacteria	0	0	0	74.87
Vibrio casei ws4539	g-Proteobacteria	Exiguobacterium acetylicum 180	Firmicutes	0	0	0	79.585
Vibrio casei ws4539	g-Proteobacteria	Corynebacterium variabile DSM 44702	Actinobacteria	0	0	0	77.902
Vibrio casei ws4539	g-Proteobacteria	Enterococcus durans LMG10746	Firmicutes	0	0	0	79.228
Vibrio casei ws4539	g-Proteobacteria	Stenotrophomonas rhizophila PCA13	g-Proteobacteria	0	0	0	83.635
Vibrio casei ws4539	g-Proteobacteria	Chryseobacterium ginsengisoli M17	g-Proteobacteria	0	0	0	70.229
Vibrio casei ws4539	g-Proteobacteria	Bacillus galactosidilyticus CIP 108417	Firmicutes	0	0	0	78.802
Vibrio casei ws4539	g-Proteobacteria	Chryseobacterium vrystaatense PCAIF2.7	g-Proteobacteria	0	0	0	76.648
Vibrio casei ws4539	g-Proteobacteria	Raoultella ornithinolytica TL332	g-Proteobacteria	0	0	0	86.226
Vibrio casei ws4539	g-Proteobacteria	Glutamicibacter arilaitensis GMPA29	Actinobacteria	0	0	0	79.167
Vibrio casei ws4539	g-Proteobacteria	Microbacterium gubbeenense DSM 15944	Actinobacteria	0	0	0	77.816
Vibrio casei ws4539	g-Proteobacteria	Corynebacterium casei JB4	Actinobacteria	0	0	0	78.246
Vibrio casei ws4539	g-Proteobacteria	Staphylococcus fleuretti CIP106114	Firmicutes	0	0	0	79.204
Vibrio casei ws4539	g-Proteobacteria	Vagococcus fluvialis bH819	Firmicutes	0	0	0	74.662
Vibrio casei ws4539	g-Proteobacteria	Providencia heimbachae GR4	g-Proteobacteria	0	0	0	91.869
Vibrio casei ws4539	g-Proteobacteria	Pantoea agglomerans PCAiQ6.3	g-Proteobacteria	0	0	0	91.631
Vibrio casei ws4539	g-Proteobacteria	Agrococcus casei LMG22410	Actinobacteria	0	0	0	78.996
Vibrio casei ws4539	g-Proteobacteria	Psychrobacter faecalis H5	g-Proteobacteria	0	0	0	85.127
Vibrio casei ws4539	g-Proteobacteria	Kocuria carniphila CRBM38	Actinobacteria	0	0	0	75.993
Vibrio casei ws4539	g-Proteobacteria	Lactobacillus casei BD-II	Firmicutes	0	0	0	79.052
Vibrio casei ws4539	g-Proteobacteria	Comamonas testosteroni NL2512	g-Proteobacteria	0	0	0	80.189
Vibrio casei ws4539	g-Proteobacteria	Pseudomonas psychrophila 1E44	g-Proteobacteria	0	0	0	86.881
Vibrio casei ws4539	g-Proteobacteria	Alcaligenes faecalis 2L10	g-Proteobacteria	0	0	0	82.343
Vibrio casei ws4539	g-Proteobacteria	Staphylococcus caprae DSM 20608	Firmicutes	0	0	0	80.293
Vibrio casei ws4539	g-Proteobacteria	Brachybacterium alimentarium 900.8	Actinobacteria	0	0	0	77.73
Vibrio casei ws4539	g-Proteobacteria	Streptococcus salivarius CJ181	Firmicutes	0	0	0	76.098
Vibrio casei ws4539	g-Proteobacteria	Psychrobacter immobilis PG1	g-Proteobacteria	2	2220	0	85.307
Vibrio casei ws4539	g-Proteobacteria	Brevibacterium linens 962.8	Actinobacteria	0	0	0	77.405
Vibrio casei ws4539	g-Proteobacteria	Glutamicibacter sp. BW78	Actinobacteria	0	0	0	77.988
Vibrio casei ws4539	g-Proteobacteria	Bacillus pumilus M21	Firmicutes	0	0	0	79.024
Vibrio casei ws4539	g-Proteobacteria	Streptococcus infantarius 11FA	Firmicutes	0	0	0	76.199
Vibrio casei ws4539	g-Proteobacteria	Stenotrophomonas indologenes PCAi2.2	g-Proteobacteria	0	0	0	79.777
Vibrio casei ws4539	g-Proteobacteria	Staphylococcus equorum BC9	Firmicutes	0	0	0	80.12
Vibrio casei ws4539	g-Proteobacteria	Brevibacterium linens 908.7	Actinobacteria	0	0	0	77.491
Vibrio casei ws4539	g-Proteobacteria	Brochothrix thermosphacta cH814	Firmicutes	0	0	0	76.986
Vibrio casei ws4539	g-Proteobacteria	Leucobacter sp. ER15 166 BHI15	Actinobacteria	0	0	0	75.855
Vibrio casei ws4539	g-Proteobacteria	Facklamia tabacinasalis FAM208 56	Firmicutes	0	0	0	76.8
Vibrio casei ws4539	g-Proteobacteria	Enterococcus saccharominimus M17 423	Firmicutes	0	0	0	75.887
Vibrio casei ws4539	g-Proteobacteria	Brevibacterium antiquum CNRZ918	Actinobacteria	0	0	0	76.976
Vibrio casei ws4539	g-Proteobacteria	Sphingobacterium sp JB170	g-Proteobacteria	0	0	0	73.924
Vibrio casei ws4539	g-Proteobacteria	Chryseobacterium shigense PCAiB2.3	g-Proteobacteria	0	0	0	73.259
Vibrio casei ws4539	g-Proteobacteria	Vagococcus lutrae FAM208	Firmicutes	0	0	0	78.066
Vibrio casei ws4539	g-Proteobacteria	Staphylococcus vitulinus Ma1	Firmicutes	0	0	0	79.947
Vibrio casei ws4539	g-Proteobacteria	Lactobacillus brevis KB290	Firmicutes	0	0	0	77.931
Vibrio casei ws4539	g-Proteobacteria	Psychrobacter sp JB193	g-Proteobacteria	2	2220	0	85.739
Vibrio casei ws4539	g-Proteobacteria	Halomonas venusta 3F2F	g-Proteobacteria	0	0	0	87.168
Vibrio casei ws4539	g-Proteobacteria	Paenibacillus sp. 3M17	Firmicutes	0	0	0	78.704
Vibrio casei ws4539	g-Proteobacteria	Serratia proteamaculans 1C2F	g-Proteobacteria	0	0	0	91.259
Vibrio casei ws4539	g-Proteobacteria	Glutamicibacter arilaitensis Re117	Actinobacteria	0	0	0	78.504
Vibrio casei ws4539	g-Proteobacteria	Lactobacillus brevis ATCC 367	Firmicutes	0	0	0	77.931
Vibrio casei ws4539	g-Proteobacteria	Citrobacter freundii Pi15	g-Proteobacteria	0	0	0	88.811
Vibrio casei ws4539	g-Proteobacteria	Propionibacterium thoenii LSPTH1	Actinobacteria	0	0	0	77.453
Vibrio casei ws4539	g-Proteobacteria	Glutamicibacter arilaitensis 3M03	Actinobacteria	0	0	0	79.439
Vibrio casei ws4539	g-Proteobacteria	Brevibacterium linens ATCC 9172	Actinobacteria	0	0	0	76.082
Vibrio casei ws4539	g-Proteobacteria	Weissella cibaria 3385	Firmicutes	0	0	0	81.568
Vibrio casei ws4539	g-Proteobacteria	Rothia mucilaginosa M1710	Actinobacteria	0	0	0	76.119
Vibrio casei ws4539	g-Proteobacteria	Brachybacterium alimentarium 341.9	Actinobacteria	0	0	0	77.73
Vibrio casei ws4539	g-Proteobacteria	Brevibacterium casei S18	Actinobacteria	0	0	0	77.386
Vibrio casei ws4539	g-Proteobacteria	Pseudomonas fragi 1E26	g-Proteobacteria	0	0	0	87.282
Vibrio casei ws4539	g-Proteobacteria	Enterobacter amnigenus CV9	g-Proteobacteria	0	0	0	91.286
Vibrio casei ws4539	g-Proteobacteria	Carnobacterium maltaromaticum 38b	Firmicutes	0	0	0	79.5
Vibrio casei ws4539	g-Proteobacteria	Glutamicibacter arilaitensis JB182	Actinobacteria	0	0	0	78.504
Vibrio casei ws4539	g-Proteobacteria	Psychrobacter namhaensis 1439	g-Proteobacteria	0	0	0	85.815
Vibrio casei ws4539	g-Proteobacteria	Micrococcus luteus Mu201	Actinobacteria	0	0	0	78.512
Vibrio casei ws4539	g-Proteobacteria	Pediococcus parvulus CIRM750	Actinobacteria	0	0	0	78.512
Vibrio casei ws4539	g-Proteobacteria	Exiguobacterium sibiricum NL255	Firmicutes	0	0	0	77.487
Vibrio casei ws4539	g-Proteobacteria	Acinetobacter johnsonii 3M05	g-Proteobacteria	0	0	0	84.18
Vibrio casei ws4539	g-Proteobacteria	Lactobacillus crustorum FH4	Firmicutes	0	0	0	76.759
Vibrio casei ws4539	g-Proteobacteria	Serratia marescens 448	g-Proteobacteria	0	0	0	91.801
Vibrio casei ws4539	g-Proteobacteria	Staphylococcus equorum BC15	Firmicutes	0	0	0	80.379
Vibrio casei ws4539	g-Proteobacteria	Stenotrophomonas maltophilia Pi1	g-Proteobacteria	0	0	0	81.068
Vibrio casei ws4539	g-Proteobacteria	Listeria monocytogenes str. Scott A	Firmicutes	0	0	0	80.103
Vibrio casei ws4539	g-Proteobacteria	Brachybacterium alimentarium 862.8	Actinobacteria	0	0	0	77.73
Vibrio casei ws4539	g-Proteobacteria	Brevibacterium casei CIP 102111	Actinobacteria	0	0	0	75.98
Vibrio casei ws4539	g-Proteobacteria	Brevibacterium linens 738.8	Actinobacteria	0	0	0	77.491
Vibrio casei ws4539	g-Proteobacteria	Mycobacterium vaccae CIP 105934	Actinobacteria	0	0	0	77.921
Vibrio casei ws4539	g-Proteobacteria	Proteus vulgaris 1M25	g-Proteobacteria	0	0	0	91.148
Vibrio casei ws4539	g-Proteobacteria	Leuconostoc mesenteroides CNRZ1283	Firmicutes	0	0	0	78.571
Vibrio casei ws4539	g-Proteobacteria	Brachybacterium alimentarium 947.11	Actinobacteria	0	0	0	77.73
Vibrio casei ws4539	g-Proteobacteria	Streptococcus macedonicus 679	Firmicutes	0	0	0	75.077
Vibrio casei ws4539	g-Proteobacteria	Staphylococcus warneri 1445	Firmicutes	0	0	0	76.469
Vibrio casei ws4539	g-Proteobacteria	Providencia rettgeri 947	g-Proteobacteria	8	6852	0	91.581
Vibrio casei ws4539	g-Proteobacteria	Proteus hauseri 1M10	g-Proteobacteria	0	0	0	91.436
Vibrio casei ws4539	g-Proteobacteria	Providencia alcalifaciens GM3	g-Proteobacteria	0	0	0	91.285
Lactococcus plantarum NCDO 1869	Firmicutes	Glutamicibacter bergerei BW77	Actinobacteria	0	0	0	76.496
Lactococcus plantarum NCDO 1869	Firmicutes	Alkalibacterium kapii FAM208 38	Firmicutes	0	0	0	85.714
Lactococcus plantarum NCDO 1869	Firmicutes	Listeria fleischmannii subsp. fleischmannii LU2006-1	Firmicutes	0	0	0	86.9
Lactococcus plantarum NCDO 1869	Firmicutes	Alcaligenes sp. 2L29	g-Proteobacteria	0	0	0	73.77
Lactococcus plantarum NCDO 1869	Firmicutes	Paenibacillus lactis CIP 108827	Firmicutes	0	0	0	85.047
Lactococcus plantarum NCDO 1869	Firmicutes	Corynebacterium ammoniagenes ws2211	Actinobacteria	0	0	0	79.37
Lactococcus plantarum NCDO 1869	Firmicutes	Brachybacterium alimentarium 738.10	Actinobacteria	0	0	0	75.517
Lactococcus plantarum NCDO 1869	Firmicutes	Halomonas sp. 1M45	g-Proteobacteria	0	0	0	75.599
Lactococcus plantarum NCDO 1869	Firmicutes	Brevibacterium linens BL2	Actinobacteria	0	0	0	75.952
Lactococcus plantarum NCDO 1869	Firmicutes	Pseudomonas lundensis PCAiD2.2	g-Proteobacteria	0	0	0	81.289
Lactococcus plantarum NCDO 1869	Firmicutes	Brevibacterium linens 876.7	Actinobacteria	0	0	0	76.17
Lactococcus plantarum NCDO 1869	Firmicutes	Brevibacterium linens 900.6	Actinobacteria	0	0	0	75.952
Lactococcus plantarum NCDO 1869	Firmicutes	Psychrobacter aquimaris ER15 174 BHI7	g-Proteobacteria	0	0	0	76.185
Lactococcus plantarum NCDO 1869	Firmicutes	Glutamicibacter sp. BW80	Actinobacteria	0	0	0	76.605
Lactococcus plantarum NCDO 1869	Firmicutes	Leuconostoc pseudomesenteroides MSE7	Firmicutes	0	0	0	82.334
Lactococcus plantarum NCDO 1869	Firmicutes	Pseudomonas fluorescens PCAiD6.2	g-Proteobacteria	0	0	0	76.823
Lactococcus plantarum NCDO 1869	Firmicutes	Bavariicoccus seileri ws4188	Firmicutes	0	0	0	87.889
Lactococcus plantarum NCDO 1869	Firmicutes	Ornithinibacillus bavariensis CIP 109287	Firmicutes	0	0	0	87.251
Lactococcus plantarum NCDO 1869	Firmicutes	Bacillus altitudinis 263	Firmicutes	0	0	0	86.975
Lactococcus plantarum NCDO 1869	Firmicutes	Brachybacterium alimentarium JB7	Actinobacteria	0	0	0	75.517
Lactococcus plantarum NCDO 1869	Firmicutes	Kluyvera intermedia TL336A	g-Proteobacteria	0	0	0	74.7
Lactococcus plantarum NCDO 1869	Firmicutes	Corynebacterium flavescens Mu128	Actinobacteria	0	0	0	77.09
Lactococcus plantarum NCDO 1869	Firmicutes	Glutamicibacter arilaitensis Ca106	Actinobacteria	0	0	0	77.733
Lactococcus plantarum NCDO 1869	Firmicutes	Propionibacterium acidipropinicii LSPAc1	Actinobacteria	0	0	0	72.748
Lactococcus plantarum NCDO 1869	Firmicutes	Serratia rubidaea TA 26	g-Proteobacteria	0	0	0	72.534
Lactococcus plantarum NCDO 1869	Firmicutes	Psychrobacter celer 91	g-Proteobacteria	0	0	0	77.074
Lactococcus plantarum NCDO 1869	Firmicutes	Luteococcus japonicus LSP Lj1	Actinobacteria	0	0	0	73.993
Lactococcus plantarum NCDO 1869	Firmicutes	Brevibacterium linens 862.7	Actinobacteria	0	0	0	75.952
Lactococcus plantarum NCDO 1869	Firmicutes	Klebsiella oxytoca Pi20	g-Proteobacteria	0	0	0	75.245
Lactococcus plantarum NCDO 1869	Firmicutes	Chryseobacterium bovis Pi18	g-Proteobacteria	0	0	0	70.338
Lactococcus plantarum NCDO 1869	Firmicutes	Staphylococcus lentus Ca2	Firmicutes	0	0	0	87.183
Lactococcus plantarum NCDO 1869	Firmicutes	Halomonas venusta 3D7M	g-Proteobacteria	0	0	0	76.035
Lactococcus plantarum NCDO 1869	Firmicutes	Lactobacillus casei ATCC 334 (Lactobacillus paracasei ATCC 334)	Firmicutes	0	0	0	85.808
Lactococcus plantarum NCDO 1869	Firmicutes	Corynebacterium casei UCMA 3821	Actinobacteria	0	0	0	77.149
Lactococcus plantarum NCDO 1869	Firmicutes	Propionibacterium freudenreichii subsp. shermanii CIRM-BIA1	Actinobacteria	0	0	0	74.373
Lactococcus plantarum NCDO 1869	Firmicutes	Listeria monocytogenes serotype 4bV str. LS542	Firmicutes	0	0	0	87.009
Lactococcus plantarum NCDO 1869	Firmicutes	Acinetobacter genospecies 3 PCAiE6.10	g-Proteobacteria	0	0	0	77.773
Lactococcus plantarum NCDO 1869	Firmicutes	Kocuria varians Mu208	Actinobacteria	0	0	0	76.873
Lactococcus plantarum NCDO 1869	Firmicutes	Brachybacterium alimentarium CNRZ925	Actinobacteria	0	0	0	75.299
Lactococcus plantarum NCDO 1869	Firmicutes	Weissella cibaria 3386	Firmicutes	0	0	0	76.357
Lactococcus plantarum NCDO 1869	Firmicutes	Sphingobacterium faecium PCAiF2.5	g-Proteobacteria	0	0	0	72.331
Lactococcus plantarum NCDO 1869	Firmicutes	Brachybacterium alimentarium 908.11	Actinobacteria	0	0	0	75.517
Lactococcus plantarum NCDO 1869	Firmicutes	Corynebacterium variabile	Actinobacteria	0	0	0	76.061
Lactococcus plantarum NCDO 1869	Firmicutes	Corynebacterium stationis CRBM6	Actinobacteria	0	0	0	69.913
Lactococcus plantarum NCDO 1869	Firmicutes	Brevibacterium linens 341.13	Actinobacteria	0	0	0	75.952
Lactococcus plantarum NCDO 1869	Firmicutes	Morganella psychrotolerans 925	g-Proteobacteria	0	0	0	75.527
Lactococcus plantarum NCDO 1869	Firmicutes	Raoultella planticola 3M45	g-Proteobacteria	0	0	0	75.834
Lactococcus plantarum NCDO 1869	Firmicutes	Streptococcus infantarius subsp. infantarius 3AG	Firmicutes	0	0	0	92.105
Lactococcus plantarum NCDO 1869	Firmicutes	Citrococcus sp. ws2216	Actinobacteria	0	0	0	76.63
Lactococcus plantarum NCDO 1869	Firmicutes	Brevibacterium iodinum ATCC 49514	Actinobacteria	0	0	0	76.524
Lactococcus plantarum NCDO 1869	Firmicutes	Leucobacter komagatae 1L36	Actinobacteria	0	0	0	76.071
Lactococcus plantarum NCDO 1869	Firmicutes	Halomonas venusta 3A7M	g-Proteobacteria	0	0	0	76.035
Lactococcus plantarum NCDO 1869	Firmicutes	Microbacterium sp. JB110	Actinobacteria	0	0	0	76.931
Lactococcus plantarum NCDO 1869	Firmicutes	Pseudoalteromonas sp JB197	g-Proteobacteria	0	0	0	75.381
Lactococcus plantarum NCDO 1869	Firmicutes	Enterococcus malodoratus FAM208 55	Firmicutes	0	0	0	88.684
Lactococcus plantarum NCDO 1869	Firmicutes	Enterococcus hirae SB10	Firmicutes	0	0	0	86.909
Lactococcus plantarum NCDO 1869	Firmicutes	Halomonas sp JB37	g-Proteobacteria	0	0	0	75.163
Lactococcus plantarum NCDO 1869	Firmicutes	Macrococcus caseolyticus ATCC 13458	Firmicutes	0	0	0	85.419
Lactococcus plantarum NCDO 1869	Firmicutes	Brevibacterium linens 947.7	Actinobacteria	0	0	0	75.952
Lactococcus plantarum NCDO 1869	Firmicutes	Jeotgalicoccus psychrophilus CRBMD21	Firmicutes	0	0	0	84.563
Lactococcus plantarum NCDO 1869	Firmicutes	Brevibacterium linens JB5	Actinobacteria	0	0	0	76.061
Lactococcus plantarum NCDO 1869	Firmicutes	Delftia acidovorans PCA12	g-Proteobacteria	0	0	0	73.666
Lactococcus plantarum NCDO 1869	Firmicutes	Pseudomonas pseudojaponica PCAi6.5	g-Proteobacteria	0	0	0	74.973
Lactococcus plantarum NCDO 1869	Firmicutes	Bacillus fordii CIP 108821	Firmicutes	0	0	0	85.289
Lactococcus plantarum NCDO 1869	Firmicutes	Leuconostoc citreum MSE2	Firmicutes	0	0	0	80.027
Lactococcus plantarum NCDO 1869	Firmicutes	Morganella morganii subsp. siboni 3A5A	g-Proteobacteria	0	0	0	76.636
Lactococcus plantarum NCDO 1869	Firmicutes	Brachybacterium alimentarium 962.10	Actinobacteria	0	0	0	75.517
Lactococcus plantarum NCDO 1869	Firmicutes	Brevibacillus parabrevis CIP 110335	Firmicutes	0	0	0	83.825
Lactococcus plantarum NCDO 1869	Firmicutes	Brachybacterium alimentarium 876.9	Actinobacteria	0	0	0	75.517
Lactococcus plantarum NCDO 1869	Firmicutes	Staphylococcus xylosus	Firmicutes	0	0	0	84.657
Lactococcus plantarum NCDO 1869	Firmicutes	Chryseobacterium joostei PCAiD6.3	g-Proteobacteria	0	0	0	70.338
Lactococcus plantarum NCDO 1869	Firmicutes	Microbacterium oxydans PCA1	Actinobacteria	0	0	0	75
Lactococcus plantarum NCDO 1869	Firmicutes	Exiguobacterium acetylicum 180	Firmicutes	0	0	0	85.023
Lactococcus plantarum NCDO 1869	Firmicutes	Corynebacterium variabile DSM 44702	Actinobacteria	0	0	0	76.823
Lactococcus plantarum NCDO 1869	Firmicutes	Enterococcus durans LMG10746	Firmicutes	0	0	0	90.546
Lactococcus plantarum NCDO 1869	Firmicutes	Stenotrophomonas rhizophila PCA13	g-Proteobacteria	0	0	0	77.233
Lactococcus plantarum NCDO 1869	Firmicutes	Chryseobacterium ginsengisoli M17	g-Proteobacteria	0	0	0	68.791
Lactococcus plantarum NCDO 1869	Firmicutes	Bacillus galactosidilyticus CIP 108417	Firmicutes	0	0	0	85.846
Lactococcus plantarum NCDO 1869	Firmicutes	Chryseobacterium vrystaatense PCAIF2.7	g-Proteobacteria	0	0	0	77.032
Lactococcus plantarum NCDO 1869	Firmicutes	Raoultella ornithinolytica TL332	g-Proteobacteria	0	0	0	72.616
Lactococcus plantarum NCDO 1869	Firmicutes	Glutamicibacter arilaitensis GMPA29	Actinobacteria	0	0	0	74.844
Lactococcus plantarum NCDO 1869	Firmicutes	Microbacterium gubbeenense DSM 15944	Actinobacteria	0	0	0	77.149
Lactococcus plantarum NCDO 1869	Firmicutes	Corynebacterium casei JB4	Actinobacteria	0	0	0	77.149
Lactococcus plantarum NCDO 1869	Firmicutes	Staphylococcus fleuretti CIP106114	Firmicutes	0	0	0	85.74
Lactococcus plantarum NCDO 1869	Firmicutes	Vagococcus fluvialis bH819	Firmicutes	0	0	0	84.351
Lactococcus plantarum NCDO 1869	Firmicutes	Providencia heimbachae GR4	g-Proteobacteria	0	0	0	74.754
Lactococcus plantarum NCDO 1869	Firmicutes	Pantoea agglomerans PCAiQ6.3	g-Proteobacteria	0	0	0	75.027
Lactococcus plantarum NCDO 1869	Firmicutes	Agrococcus casei LMG22410	Actinobacteria	0	0	0	77.602
Lactococcus plantarum NCDO 1869	Firmicutes	Psychrobacter faecalis H5	g-Proteobacteria	0	0	0	76.867
Lactococcus plantarum NCDO 1869	Firmicutes	Kocuria carniphila CRBM38	Actinobacteria	0	0	0	76.357
Lactococcus plantarum NCDO 1869	Firmicutes	Lactobacillus casei BD-II	Firmicutes	0	0	0	85.808
Lactococcus plantarum NCDO 1869	Firmicutes	Comamonas testosteroni NL2512	g-Proteobacteria	0	0	0	75.054
Lactococcus plantarum NCDO 1869	Firmicutes	Pseudomonas psychrophila 1E44	g-Proteobacteria	0	0	0	78.238
Lactococcus plantarum NCDO 1869	Firmicutes	Alcaligenes faecalis 2L10	g-Proteobacteria	0	0	0	73.638
Lactococcus plantarum NCDO 1869	Firmicutes	Staphylococcus caprae DSM 20608	Firmicutes	0	0	0	84.858
Lactococcus plantarum NCDO 1869	Firmicutes	Brachybacterium alimentarium 900.8	Actinobacteria	0	0	0	75.517
Lactococcus plantarum NCDO 1869	Firmicutes	Streptococcus salivarius CJ181	Firmicutes	0	0	0	89.455
Lactococcus plantarum NCDO 1869	Firmicutes	Psychrobacter immobilis PG1	g-Proteobacteria	0	0	0	76.201
Lactococcus plantarum NCDO 1869	Firmicutes	Brevibacterium linens 962.8	Actinobacteria	0	0	0	75.843
Lactococcus plantarum NCDO 1869	Firmicutes	Glutamicibacter sp. BW78	Actinobacteria	0	0	0	76.931
Lactococcus plantarum NCDO 1869	Firmicutes	Bacillus pumilus M21	Firmicutes	0	0	0	84.168
Lactococcus plantarum NCDO 1869	Firmicutes	Streptococcus infantarius 11FA	Firmicutes	0	0	0	92.295
Lactococcus plantarum NCDO 1869	Firmicutes	Stenotrophomonas indologenes PCAi2.2	g-Proteobacteria	0	0	0	75.272
Lactococcus plantarum NCDO 1869	Firmicutes	Staphylococcus equorum BC9	Firmicutes	0	0	0	84.641
Lactococcus plantarum NCDO 1869	Firmicutes	Brevibacterium linens 908.7	Actinobacteria	0	0	0	75.952
Lactococcus plantarum NCDO 1869	Firmicutes	Brochothrix thermosphacta cH814	Firmicutes	0	0	0	85.06
Lactococcus plantarum NCDO 1869	Firmicutes	Leucobacter sp. ER15 166 BHI15	Actinobacteria	0	0	0	74.538
Lactococcus plantarum NCDO 1869	Firmicutes	Facklamia tabacinasalis FAM208 56	Firmicutes	0	0	0	85.519
Lactococcus plantarum NCDO 1869	Firmicutes	Enterococcus saccharominimus M17 423	Firmicutes	1	2118	0	85.559
Lactococcus plantarum NCDO 1869	Firmicutes	Brevibacterium antiquum CNRZ918	Actinobacteria	0	0	0	75.626
Lactococcus plantarum NCDO 1869	Firmicutes	Sphingobacterium sp JB170	g-Proteobacteria	0	0	0	72.113
Lactococcus plantarum NCDO 1869	Firmicutes	Chryseobacterium shigense PCAiB2.3	g-Proteobacteria	0	0	0	70.774
Lactococcus plantarum NCDO 1869	Firmicutes	Vagococcus lutrae FAM208	Firmicutes	0	0	0	88.905
Lactococcus plantarum NCDO 1869	Firmicutes	Staphylococcus vitulinus Ma1	Firmicutes	0	0	0	87.316
Lactococcus plantarum NCDO 1869	Firmicutes	Lactobacillus brevis KB290	Firmicutes	0	0	0	87.009
Lactococcus plantarum NCDO 1869	Firmicutes	Psychrobacter sp JB193	g-Proteobacteria	0	0	0	76.31
Lactococcus plantarum NCDO 1869	Firmicutes	Halomonas venusta 3F2F	g-Proteobacteria	0	0	0	76.613
Lactococcus plantarum NCDO 1869	Firmicutes	Paenibacillus sp. 3M17	Firmicutes	0	0	0	84.722
Lactococcus plantarum NCDO 1869	Firmicutes	Serratia proteamaculans 1C2F	g-Proteobacteria	0	0	0	74.446
Lactococcus plantarum NCDO 1869	Firmicutes	Glutamicibacter arilaitensis Re117	Actinobacteria	0	0	0	76.714
Lactococcus plantarum NCDO 1869	Firmicutes	Lactobacillus brevis ATCC 367	Firmicutes	0	0	0	87.009
Lactococcus plantarum NCDO 1869	Firmicutes	Citrobacter freundii Pi15	g-Proteobacteria	0	0	0	74.073
Lactococcus plantarum NCDO 1869	Firmicutes	Propionibacterium thoenii LSPTH1	Actinobacteria	0	0	0	76.546
Lactococcus plantarum NCDO 1869	Firmicutes	Glutamicibacter arilaitensis 3M03	Actinobacteria	0	0	0	77.733
Lactococcus plantarum NCDO 1869	Firmicutes	Brevibacterium linens ATCC 9172	Actinobacteria	0	0	0	76.23
Lactococcus plantarum NCDO 1869	Firmicutes	Weissella cibaria 3385	Firmicutes	0	0	0	75.381
Lactococcus plantarum NCDO 1869	Firmicutes	Rothia mucilaginosa M1710	Actinobacteria	0	0	0	74.973
Lactococcus plantarum NCDO 1869	Firmicutes	Brachybacterium alimentarium 341.9	Actinobacteria	0	0	0	75.517
Lactococcus plantarum NCDO 1869	Firmicutes	Brevibacterium casei S18	Actinobacteria	0	0	0	75.843
Lactococcus plantarum NCDO 1869	Firmicutes	Pseudomonas fragi 1E26	g-Proteobacteria	0	0	0	78.371
Lactococcus plantarum NCDO 1869	Firmicutes	Enterobacter amnigenus CV9	g-Proteobacteria	0	0	0	74.7
Lactococcus plantarum NCDO 1869	Firmicutes	Carnobacterium maltaromaticum 38b	Firmicutes	0	0	0	87.132
Lactococcus plantarum NCDO 1869	Firmicutes	Glutamicibacter arilaitensis JB182	Actinobacteria	0	0	0	76.714
Lactococcus plantarum NCDO 1869	Firmicutes	Psychrobacter namhaensis 1439	g-Proteobacteria	0	0	0	77.57
Lactococcus plantarum NCDO 1869	Firmicutes	Micrococcus luteus Mu201	Actinobacteria	0	0	0	76.714
Lactococcus plantarum NCDO 1869	Firmicutes	Pediococcus parvulus CIRM750	Actinobacteria	0	0	0	76.714
Lactococcus plantarum NCDO 1869	Firmicutes	Exiguobacterium sibiricum NL255	Firmicutes	0	0	0	83.615
Lactococcus plantarum NCDO 1869	Firmicutes	Acinetobacter johnsonii 3M05	g-Proteobacteria	0	0	0	75.461
Lactococcus plantarum NCDO 1869	Firmicutes	Lactobacillus crustorum FH4	Firmicutes	0	0	0	83.929
Lactococcus plantarum NCDO 1869	Firmicutes	Serratia marescens 448	g-Proteobacteria	0	0	0	76.273
Lactococcus plantarum NCDO 1869	Firmicutes	Staphylococcus equorum BC15	Firmicutes	0	0	0	85.076
Lactococcus plantarum NCDO 1869	Firmicutes	Stenotrophomonas maltophilia Pi1	g-Proteobacteria	0	0	0	75.789
Lactococcus plantarum NCDO 1869	Firmicutes	Listeria monocytogenes str. Scott A	Firmicutes	0	0	0	86.914
Lactococcus plantarum NCDO 1869	Firmicutes	Brachybacterium alimentarium 862.8	Actinobacteria	0	0	0	75.517
Lactococcus plantarum NCDO 1869	Firmicutes	Brevibacterium casei CIP 102111	Actinobacteria	0	0	0	75.275
Lactococcus plantarum NCDO 1869	Firmicutes	Brevibacterium linens 738.8	Actinobacteria	0	0	0	75.952
Lactococcus plantarum NCDO 1869	Firmicutes	Mycobacterium vaccae CIP 105934	Actinobacteria	0	0	0	75.19
Lactococcus plantarum NCDO 1869	Firmicutes	Proteus vulgaris 1M25	g-Proteobacteria	0	0	0	74.613
Lactococcus plantarum NCDO 1869	Firmicutes	Leuconostoc mesenteroides CNRZ1283	Firmicutes	0	0	0	84.624
Lactococcus plantarum NCDO 1869	Firmicutes	Brachybacterium alimentarium 947.11	Actinobacteria	0	0	0	75.517
Lactococcus plantarum NCDO 1869	Firmicutes	Streptococcus macedonicus 679	Firmicutes	0	0	0	90.316
Lactococcus plantarum NCDO 1869	Firmicutes	Staphylococcus warneri 1445	Firmicutes	0	0	0	81.692
Lactococcus plantarum NCDO 1869	Firmicutes	Providencia rettgeri 947	g-Proteobacteria	0	0	0	75.057
Lactococcus plantarum NCDO 1869	Firmicutes	Proteus hauseri 1M10	g-Proteobacteria	0	0	0	74.863
Lactococcus plantarum NCDO 1869	Firmicutes	Vibrio litoralis B4	g-Proteobacteria	0	0	0	76.688
Lactococcus plantarum NCDO 1869	Firmicutes	Providencia alcalifaciens GM3	g-Proteobacteria	0	0	0	73.932
Glutamicibacter bergerei BW77	Actinobacteria	Alkalibacterium kapii FAM208 38	Firmicutes	2	1427	0	76.1
Glutamicibacter bergerei BW77	Actinobacteria	Listeria fleischmannii subsp. fleischmannii LU2006-1	Firmicutes	0	0	0	77.019
Glutamicibacter bergerei BW77	Actinobacteria	Alcaligenes sp. 2L29	g-Proteobacteria	0	0	0	76.932
Glutamicibacter bergerei BW77	Actinobacteria	Paenibacillus lactis CIP 108827	Firmicutes	0	0	0	79.692
Glutamicibacter bergerei BW77	Actinobacteria	Corynebacterium ammoniagenes ws2211	Actinobacteria	0	0	0	86.847
Glutamicibacter bergerei BW77	Actinobacteria	Brachybacterium alimentarium 738.10	Actinobacteria	6	5799	0	92.138
Glutamicibacter bergerei BW77	Actinobacteria	Halomonas sp. 1M45	g-Proteobacteria	0	0	0	77.887
Glutamicibacter bergerei BW77	Actinobacteria	Brevibacterium linens BL2	Actinobacteria	0	0	0	88.645
Glutamicibacter bergerei BW77	Actinobacteria	Pseudomonas lundensis PCAiD2.2	g-Proteobacteria	0	0	0	79.507
Glutamicibacter bergerei BW77	Actinobacteria	Brevibacterium linens 876.7	Actinobacteria	1	1542	0	88.645
Glutamicibacter bergerei BW77	Actinobacteria	Brevibacterium linens 900.6	Actinobacteria	2	2253	0	88.645
Glutamicibacter bergerei BW77	Actinobacteria	Psychrobacter aquimaris ER15 174 BHI7	g-Proteobacteria	0	0	0	76.532
Glutamicibacter bergerei BW77	Actinobacteria	Leuconostoc pseudomesenteroides MSE7	Firmicutes	0	0	0	74.502
Glutamicibacter bergerei BW77	Actinobacteria	Pseudomonas fluorescens PCAiD6.2	g-Proteobacteria	0	0	0	72.342
Glutamicibacter bergerei BW77	Actinobacteria	Bavariicoccus seileri ws4188	Firmicutes	0	0	0	74.668
Glutamicibacter bergerei BW77	Actinobacteria	Ornithinibacillus bavariensis CIP 109287	Firmicutes	0	0	0	80.18
Glutamicibacter bergerei BW77	Actinobacteria	Bacillus altitudinis 263	Firmicutes	0	0	0	80.081
Glutamicibacter bergerei BW77	Actinobacteria	Brachybacterium alimentarium JB7	Actinobacteria	1	870	0	92.138
Glutamicibacter bergerei BW77	Actinobacteria	Kluyvera intermedia TL336A	g-Proteobacteria	0	0	0	73.107
Glutamicibacter bergerei BW77	Actinobacteria	Corynebacterium flavescens Mu128	Actinobacteria	0	0	0	84.9
Glutamicibacter bergerei BW77	Actinobacteria	Propionibacterium acidipropinicii LSPAc1	Actinobacteria	0	0	0	80.261
Glutamicibacter bergerei BW77	Actinobacteria	Serratia rubidaea TA 26	g-Proteobacteria	0	0	0	75.372
Glutamicibacter bergerei BW77	Actinobacteria	Psychrobacter celer 91	g-Proteobacteria	3	2430	0	77.519
Glutamicibacter bergerei BW77	Actinobacteria	Luteococcus japonicus LSP Lj1	Actinobacteria	0	0	0	85.456
Glutamicibacter bergerei BW77	Actinobacteria	Brevibacterium linens 862.7	Actinobacteria	10	8856	0	88.645
Glutamicibacter bergerei BW77	Actinobacteria	Klebsiella oxytoca Pi20	g-Proteobacteria	0	0	0	73.338
Glutamicibacter bergerei BW77	Actinobacteria	Chryseobacterium bovis Pi18	g-Proteobacteria	0	0	0	74.769
Glutamicibacter bergerei BW77	Actinobacteria	Staphylococcus lentus Ca2	Firmicutes	0	0	0	78.366
Glutamicibacter bergerei BW77	Actinobacteria	Halomonas venusta 3D7M	g-Proteobacteria	0	0	0	78.504
Glutamicibacter bergerei BW77	Actinobacteria	Lactobacillus casei ATCC 334 (Lactobacillus paracasei ATCC 334)	Firmicutes	0	0	0	78.107
Glutamicibacter bergerei BW77	Actinobacteria	Corynebacterium casei UCMA 3821	Actinobacteria	6	6391	0	87.038
Glutamicibacter bergerei BW77	Actinobacteria	Propionibacterium freudenreichii subsp. shermanii CIRM-BIA1	Actinobacteria	0	0	0	85.014
Glutamicibacter bergerei BW77	Actinobacteria	Listeria monocytogenes serotype 4bV str. LS542	Firmicutes	0	0	0	76.977
Glutamicibacter bergerei BW77	Actinobacteria	Acinetobacter genospecies 3 PCAiE6.10	g-Proteobacteria	0	0	0	77.01
Glutamicibacter bergerei BW77	Actinobacteria	Kocuria varians Mu208	Actinobacteria	0	0	0	91.316
Glutamicibacter bergerei BW77	Actinobacteria	Brachybacterium alimentarium CNRZ925	Actinobacteria	0	0	0	91.749
Glutamicibacter bergerei BW77	Actinobacteria	Weissella cibaria 3386	Firmicutes	0	0	0	89.842
Glutamicibacter bergerei BW77	Actinobacteria	Sphingobacterium faecium PCAiF2.5	g-Proteobacteria	0	0	0	72.211
Glutamicibacter bergerei BW77	Actinobacteria	Brachybacterium alimentarium 908.11	Actinobacteria	3	2661	0	92.138
Glutamicibacter bergerei BW77	Actinobacteria	Corynebacterium variabile	Actinobacteria	0	0	0	91.911
Glutamicibacter bergerei BW77	Actinobacteria	Corynebacterium stationis CRBM6	Actinobacteria	0	0	0	75.567
Glutamicibacter bergerei BW77	Actinobacteria	Brevibacterium linens 341.13	Actinobacteria	1	1542	0	88.71
Glutamicibacter bergerei BW77	Actinobacteria	Morganella psychrotolerans 925	g-Proteobacteria	0	0	0	77.869
Glutamicibacter bergerei BW77	Actinobacteria	Raoultella planticola 3M45	g-Proteobacteria	0	0	0	79.039
Glutamicibacter bergerei BW77	Actinobacteria	Lactococcus raffinolactis NCDO617	Firmicutes	0	0	0	76.496
Glutamicibacter bergerei BW77	Actinobacteria	Streptococcus infantarius subsp. infantarius 3AG	Firmicutes	0	0	0	77.719
Glutamicibacter bergerei BW77	Actinobacteria	Citrococcus sp. ws2216	Actinobacteria	0	0	0	93.065
Glutamicibacter bergerei BW77	Actinobacteria	Brevibacterium iodinum ATCC 49514	Actinobacteria	0	0	0	88.772
Glutamicibacter bergerei BW77	Actinobacteria	Leucobacter komagatae 1L36	Actinobacteria	0	0	0	89.268
Glutamicibacter bergerei BW77	Actinobacteria	Halomonas venusta 3A7M	g-Proteobacteria	0	0	0	78.504
Glutamicibacter bergerei BW77	Actinobacteria	Microbacterium sp. JB110	Actinobacteria	0	0	0	90.461
Glutamicibacter bergerei BW77	Actinobacteria	Pseudoalteromonas sp JB197	g-Proteobacteria	0	0	0	77.095
Glutamicibacter bergerei BW77	Actinobacteria	Enterococcus malodoratus FAM208 55	Firmicutes	0	0	0	76.046
Glutamicibacter bergerei BW77	Actinobacteria	Enterococcus hirae SB10	Firmicutes	0	0	0	74.905
Glutamicibacter bergerei BW77	Actinobacteria	Halomonas sp JB37	g-Proteobacteria	0	0	0	76.71
Glutamicibacter bergerei BW77	Actinobacteria	Macrococcus caseolyticus ATCC 13458	Firmicutes	0	0	0	79.018
Glutamicibacter bergerei BW77	Actinobacteria	Brevibacterium linens 947.7	Actinobacteria	2	2142	0	88.645
Glutamicibacter bergerei BW77	Actinobacteria	Jeotgalicoccus psychrophilus CRBMD21	Firmicutes	0	0	0	77.404
Glutamicibacter bergerei BW77	Actinobacteria	Brevibacterium linens JB5	Actinobacteria	2	1626	0	88.71
Glutamicibacter bergerei BW77	Actinobacteria	Delftia acidovorans PCA12	g-Proteobacteria	0	0	0	74.974
Glutamicibacter bergerei BW77	Actinobacteria	Pseudomonas pseudojaponica PCAi6.5	g-Proteobacteria	0	0	0	77.433
Glutamicibacter bergerei BW77	Actinobacteria	Bacillus fordii CIP 108821	Firmicutes	0	0	0	79.258
Glutamicibacter bergerei BW77	Actinobacteria	Leuconostoc citreum MSE2	Firmicutes	0	0	0	72.457
Glutamicibacter bergerei BW77	Actinobacteria	Morganella morganii subsp. siboni 3A5A	g-Proteobacteria	0	0	0	78.828
Glutamicibacter bergerei BW77	Actinobacteria	Brachybacterium alimentarium 962.10	Actinobacteria	5	5139	0	92.138
Glutamicibacter bergerei BW77	Actinobacteria	Lactococcus garvieae N201	Firmicutes	0	0	0	74.901
Glutamicibacter bergerei BW77	Actinobacteria	Brevibacillus parabrevis CIP 110335	Firmicutes	0	0	0	78.295
Glutamicibacter bergerei BW77	Actinobacteria	Brachybacterium alimentarium 876.9	Actinobacteria	5	5181	0	92.138
Glutamicibacter bergerei BW77	Actinobacteria	Staphylococcus xylosus	Firmicutes	0	0	0	76.944
Glutamicibacter bergerei BW77	Actinobacteria	Chryseobacterium joostei PCAiD6.3	g-Proteobacteria	0	0	0	74.769
Glutamicibacter bergerei BW77	Actinobacteria	Microbacterium oxydans PCA1	Actinobacteria	1	711	0	86.621
Glutamicibacter bergerei BW77	Actinobacteria	Exiguobacterium acetylicum 180	Firmicutes	0	0	0	75.495
Glutamicibacter bergerei BW77	Actinobacteria	Corynebacterium variabile DSM 44702	Actinobacteria	0	0	0	87.665
Glutamicibacter bergerei BW77	Actinobacteria	Enterococcus durans LMG10746	Firmicutes	0	0	0	75.24
Glutamicibacter bergerei BW77	Actinobacteria	Stenotrophomonas rhizophila PCA13	g-Proteobacteria	0	0	0	80.396
Glutamicibacter bergerei BW77	Actinobacteria	Chryseobacterium ginsengisoli M17	g-Proteobacteria	0	0	0	72.665
Glutamicibacter bergerei BW77	Actinobacteria	Bacillus galactosidilyticus CIP 108417	Firmicutes	0	0	0	78.971
Glutamicibacter bergerei BW77	Actinobacteria	Chryseobacterium vrystaatense PCAIF2.7	g-Proteobacteria	0	0	0	75.749
Glutamicibacter bergerei BW77	Actinobacteria	Raoultella ornithinolytica TL332	g-Proteobacteria	0	0	0	74.846
Glutamicibacter bergerei BW77	Actinobacteria	Microbacterium gubbeenense DSM 15944	Actinobacteria	5	5125	0	89.337
Glutamicibacter bergerei BW77	Actinobacteria	Corynebacterium casei JB4	Actinobacteria	4	3795	0	87.103
Glutamicibacter bergerei BW77	Actinobacteria	Staphylococcus fleuretti CIP106114	Firmicutes	0	0	0	79.203
Glutamicibacter bergerei BW77	Actinobacteria	Vagococcus fluvialis bH819	Firmicutes	0	0	0	75.051
Glutamicibacter bergerei BW77	Actinobacteria	Providencia heimbachae GR4	g-Proteobacteria	0	0	0	77.759
Glutamicibacter bergerei BW77	Actinobacteria	Pantoea agglomerans PCAiQ6.3	g-Proteobacteria	0	0	0	70.599
Glutamicibacter bergerei BW77	Actinobacteria	Agrococcus casei LMG22410	Actinobacteria	0	0	0	90.733
Glutamicibacter bergerei BW77	Actinobacteria	Psychrobacter faecalis H5	g-Proteobacteria	0	0	0	76.867
Glutamicibacter bergerei BW77	Actinobacteria	Kocuria carniphila CRBM38	Actinobacteria	0	0	0	89.842
Glutamicibacter bergerei BW77	Actinobacteria	Lactobacillus casei BD-II	Firmicutes	0	0	0	78.107
Glutamicibacter bergerei BW77	Actinobacteria	Comamonas testosteroni NL2512	g-Proteobacteria	0	0	0	71.38
Glutamicibacter bergerei BW77	Actinobacteria	Pseudomonas psychrophila 1E44	g-Proteobacteria	0	0	0	79.306
Glutamicibacter bergerei BW77	Actinobacteria	Alcaligenes faecalis 2L10	g-Proteobacteria	0	0	0	77.082
Glutamicibacter bergerei BW77	Actinobacteria	Staphylococcus caprae DSM 20608	Firmicutes	0	0	0	79.12
Glutamicibacter bergerei BW77	Actinobacteria	Brachybacterium alimentarium 900.8	Actinobacteria	1	870	0	92.138
Glutamicibacter bergerei BW77	Actinobacteria	Streptococcus salivarius CJ181	Firmicutes	0	0	0	77.153
Glutamicibacter bergerei BW77	Actinobacteria	Psychrobacter immobilis PG1	g-Proteobacteria	0	0	0	77.347
Glutamicibacter bergerei BW77	Actinobacteria	Brevibacterium linens 962.8	Actinobacteria	0	0	0	88.645
Glutamicibacter bergerei BW77	Actinobacteria	Bacillus pumilus M21	Firmicutes	0	0	0	78.873
Glutamicibacter bergerei BW77	Actinobacteria	Streptococcus infantarius 11FA	Firmicutes	0	0	0	77.74
Glutamicibacter bergerei BW77	Actinobacteria	Stenotrophomonas indologenes PCAi2.2	g-Proteobacteria	0	0	0	76.917
Glutamicibacter bergerei BW77	Actinobacteria	Staphylococcus equorum BC9	Firmicutes	0	0	0	77.423
Glutamicibacter bergerei BW77	Actinobacteria	Brevibacterium linens 908.7	Actinobacteria	3	2772	0	88.645
Glutamicibacter bergerei BW77	Actinobacteria	Brochothrix thermosphacta cH814	Firmicutes	0	0	0	76.016
Glutamicibacter bergerei BW77	Actinobacteria	Leucobacter sp. ER15 166 BHI15	Actinobacteria	4	3247	0	87.674
Glutamicibacter bergerei BW77	Actinobacteria	Facklamia tabacinasalis FAM208 56	Firmicutes	0	0	0	77.081
Glutamicibacter bergerei BW77	Actinobacteria	Enterococcus saccharominimus M17 423	Firmicutes	0	0	0	75.838
Glutamicibacter bergerei BW77	Actinobacteria	Brevibacterium antiquum CNRZ918	Actinobacteria	0	0	0	89.104
Glutamicibacter bergerei BW77	Actinobacteria	Sphingobacterium sp JB170	g-Proteobacteria	0	0	0	72.369
Glutamicibacter bergerei BW77	Actinobacteria	Chryseobacterium shigense PCAiB2.3	g-Proteobacteria	0	0	0	74.46
Glutamicibacter bergerei BW77	Actinobacteria	Vagococcus lutrae FAM208	Firmicutes	0	0	0	77.886
Glutamicibacter bergerei BW77	Actinobacteria	Staphylococcus vitulinus Ma1	Firmicutes	0	0	0	80.078
Glutamicibacter bergerei BW77	Actinobacteria	Lactobacillus brevis KB290	Firmicutes	0	0	0	75.398
Glutamicibacter bergerei BW77	Actinobacteria	Psychrobacter sp JB193	g-Proteobacteria	0	0	0	76.828
Glutamicibacter bergerei BW77	Actinobacteria	Halomonas venusta 3F2F	g-Proteobacteria	0	0	0	77.535
Glutamicibacter bergerei BW77	Actinobacteria	Paenibacillus sp. 3M17	Firmicutes	0	0	0	79.866
Glutamicibacter bergerei BW77	Actinobacteria	Serratia proteamaculans 1C2F	g-Proteobacteria	0	0	0	78.434
Glutamicibacter bergerei BW77	Actinobacteria	Lactobacillus brevis ATCC 367	Firmicutes	0	0	0	75.398
Glutamicibacter bergerei BW77	Actinobacteria	Citrobacter freundii Pi15	g-Proteobacteria	0	0	0	76.216
Glutamicibacter bergerei BW77	Actinobacteria	Propionibacterium thoenii LSPTH1	Actinobacteria	0	0	0	85.446
Glutamicibacter bergerei BW77	Actinobacteria	Brevibacterium linens ATCC 9172	Actinobacteria	0	0	0	88.235
Glutamicibacter bergerei BW77	Actinobacteria	Weissella cibaria 3385	Firmicutes	0	0	0	77.682
Glutamicibacter bergerei BW77	Actinobacteria	Rothia mucilaginosa M1710	Actinobacteria	1	891	0	88.908
Glutamicibacter bergerei BW77	Actinobacteria	Brachybacterium alimentarium 341.9	Actinobacteria	8	7116	0	92.138
Glutamicibacter bergerei BW77	Actinobacteria	Brevibacterium casei S18	Actinobacteria	0	0	0	90.727
Glutamicibacter bergerei BW77	Actinobacteria	Pseudomonas fragi 1E26	g-Proteobacteria	0	0	0	79.439
Glutamicibacter bergerei BW77	Actinobacteria	Enterobacter amnigenus CV9	g-Proteobacteria	0	0	0	71.429
Glutamicibacter bergerei BW77	Actinobacteria	Carnobacterium maltaromaticum 38b	Firmicutes	0	0	0	75.506
Glutamicibacter bergerei BW77	Actinobacteria	Psychrobacter namhaensis 1439	g-Proteobacteria	0	0	0	77.453
Glutamicibacter bergerei BW77	Actinobacteria	Micrococcus luteus Mu201	Actinobacteria	0	0	0	94.688
Glutamicibacter bergerei BW77	Actinobacteria	Pediococcus parvulus CIRM750	Actinobacteria	0	0	0	94.688
Glutamicibacter bergerei BW77	Actinobacteria	Exiguobacterium sibiricum NL255	Firmicutes	0	0	0	78.201
Glutamicibacter bergerei BW77	Actinobacteria	Acinetobacter johnsonii 3M05	g-Proteobacteria	0	0	0	77.791
Glutamicibacter bergerei BW77	Actinobacteria	Lactobacillus crustorum FH4	Firmicutes	0	0	0	73.507
Glutamicibacter bergerei BW77	Actinobacteria	Serratia marescens 448	g-Proteobacteria	0	0	0	79.357
Glutamicibacter bergerei BW77	Actinobacteria	Staphylococcus equorum BC15	Firmicutes	0	0	0	77.615
Glutamicibacter bergerei BW77	Actinobacteria	Stenotrophomonas maltophilia Pi1	g-Proteobacteria	0	0	0	77.899
Glutamicibacter bergerei BW77	Actinobacteria	Listeria monocytogenes str. Scott A	Firmicutes	0	0	0	76.928
Glutamicibacter bergerei BW77	Actinobacteria	Brachybacterium alimentarium 862.8	Actinobacteria	5	5139	0	92.138
Glutamicibacter bergerei BW77	Actinobacteria	Brevibacterium casei CIP 102111	Actinobacteria	0	0	0	88.41
Glutamicibacter bergerei BW77	Actinobacteria	Brevibacterium linens 738.8	Actinobacteria	2	2253	0	88.645
Glutamicibacter bergerei BW77	Actinobacteria	Mycobacterium vaccae CIP 105934	Actinobacteria	0	0	0	85.611
Glutamicibacter bergerei BW77	Actinobacteria	Proteus vulgaris 1M25	g-Proteobacteria	0	0	0	76.877
Glutamicibacter bergerei BW77	Actinobacteria	Leuconostoc mesenteroides CNRZ1283	Firmicutes	0	0	0	74.223
Glutamicibacter bergerei BW77	Actinobacteria	Brachybacterium alimentarium 947.11	Actinobacteria	0	0	0	92.176
Glutamicibacter bergerei BW77	Actinobacteria	Streptococcus macedonicus 679	Firmicutes	0	0	0	76.23
Glutamicibacter bergerei BW77	Actinobacteria	Staphylococcus warneri 1445	Firmicutes	0	0	0	76.999
Glutamicibacter bergerei BW77	Actinobacteria	Providencia rettgeri 947	g-Proteobacteria	0	0	0	76.984
Glutamicibacter bergerei BW77	Actinobacteria	Proteus hauseri 1M10	g-Proteobacteria	0	0	0	78.362
Glutamicibacter bergerei BW77	Actinobacteria	Vibrio litoralis B4	g-Proteobacteria	0	0	0	78.676
Glutamicibacter bergerei BW77	Actinobacteria	Providencia alcalifaciens GM3	g-Proteobacteria	0	0	0	76.436
Alkalibacterium kapii FAM208 38	Firmicutes	Listeria fleischmannii subsp. fleischmannii LU2006-1	Firmicutes	0	0	0	88.108
Alkalibacterium kapii FAM208 38	Firmicutes	Alcaligenes sp. 2L29	g-Proteobacteria	0	0	0	76.408
Alkalibacterium kapii FAM208 38	Firmicutes	Paenibacillus lactis CIP 108827	Firmicutes	0	0	0	87.516
Alkalibacterium kapii FAM208 38	Firmicutes	Corynebacterium ammoniagenes ws2211	Actinobacteria	0	0	0	78.009
Alkalibacterium kapii FAM208 38	Firmicutes	Brachybacterium alimentarium 738.10	Actinobacteria	4	3762	0	74.029
Alkalibacterium kapii FAM208 38	Firmicutes	Halomonas sp. 1M45	g-Proteobacteria	0	0	0	77.972
Alkalibacterium kapii FAM208 38	Firmicutes	Brevibacterium linens BL2	Actinobacteria	0	0	0	74.763
Alkalibacterium kapii FAM208 38	Firmicutes	Pseudomonas lundensis PCAiD2.2	g-Proteobacteria	0	0	0	81.503
Alkalibacterium kapii FAM208 38	Firmicutes	Brevibacterium linens 876.7	Actinobacteria	8	7842	0	74.849
Alkalibacterium kapii FAM208 38	Firmicutes	Brevibacterium linens 900.6	Actinobacteria	0	0	0	74.763
Alkalibacterium kapii FAM208 38	Firmicutes	Psychrobacter aquimaris ER15 174 BHI7	g-Proteobacteria	0	0	0	76.13
Alkalibacterium kapii FAM208 38	Firmicutes	Glutamicibacter sp. BW80	Actinobacteria	1	557	0	76.014
Alkalibacterium kapii FAM208 38	Firmicutes	Leuconostoc pseudomesenteroides MSE7	Firmicutes	0	0	0	82.672
Alkalibacterium kapii FAM208 38	Firmicutes	Pseudomonas fluorescens PCAiD6.2	g-Proteobacteria	0	0	0	73.639
Alkalibacterium kapii FAM208 38	Firmicutes	Bavariicoccus seileri ws4188	Firmicutes	0	0	0	87.512
Alkalibacterium kapii FAM208 38	Firmicutes	Ornithinibacillus bavariensis CIP 109287	Firmicutes	0	0	0	90.851
Alkalibacterium kapii FAM208 38	Firmicutes	Bacillus altitudinis 263	Firmicutes	0	0	0	91.045
Alkalibacterium kapii FAM208 38	Firmicutes	Brachybacterium alimentarium JB7	Actinobacteria	2	1815	0	74.029
Alkalibacterium kapii FAM208 38	Firmicutes	Kluyvera intermedia TL336A	g-Proteobacteria	0	0	0	73.299
Alkalibacterium kapii FAM208 38	Firmicutes	Corynebacterium flavescens Mu128	Actinobacteria	0	0	0	72.719
Alkalibacterium kapii FAM208 38	Firmicutes	Glutamicibacter arilaitensis Ca106	Actinobacteria	1	557	0	74.681
Alkalibacterium kapii FAM208 38	Firmicutes	Propionibacterium acidipropinicii LSPAc1	Actinobacteria	0	0	0	68.612
Alkalibacterium kapii FAM208 38	Firmicutes	Serratia rubidaea TA 26	g-Proteobacteria	0	0	0	74.662
Alkalibacterium kapii FAM208 38	Firmicutes	Psychrobacter celer 91	g-Proteobacteria	0	0	0	76.786
Alkalibacterium kapii FAM208 38	Firmicutes	Luteococcus japonicus LSP Lj1	Actinobacteria	0	0	0	72.063
Alkalibacterium kapii FAM208 38	Firmicutes	Brevibacterium linens 862.7	Actinobacteria	2	1815	0	74.763
Alkalibacterium kapii FAM208 38	Firmicutes	Klebsiella oxytoca Pi20	g-Proteobacteria	0	0	0	73.043
Alkalibacterium kapii FAM208 38	Firmicutes	Chryseobacterium bovis Pi18	g-Proteobacteria	0	0	0	70.48
Alkalibacterium kapii FAM208 38	Firmicutes	Staphylococcus lentus Ca2	Firmicutes	0	0	0	88.84
Alkalibacterium kapii FAM208 38	Firmicutes	Halomonas venusta 3D7M	g-Proteobacteria	0	0	0	78.197
Alkalibacterium kapii FAM208 38	Firmicutes	Lactobacillus casei ATCC 334 (Lactobacillus paracasei ATCC 334)	Firmicutes	0	0	0	86.007
Alkalibacterium kapii FAM208 38	Firmicutes	Corynebacterium casei UCMA 3821	Actinobacteria	7	7044	0	73.425
Alkalibacterium kapii FAM208 38	Firmicutes	Propionibacterium freudenreichii subsp. shermanii CIRM-BIA1	Actinobacteria	0	0	0	72.688
Alkalibacterium kapii FAM208 38	Firmicutes	Listeria monocytogenes serotype 4bV str. LS542	Firmicutes	0	0	0	87.619
Alkalibacterium kapii FAM208 38	Firmicutes	Acinetobacter genospecies 3 PCAiE6.10	g-Proteobacteria	0	0	0	78.95
Alkalibacterium kapii FAM208 38	Firmicutes	Kocuria varians Mu208	Actinobacteria	0	0	0	76.983
Alkalibacterium kapii FAM208 38	Firmicutes	Brachybacterium alimentarium CNRZ925	Actinobacteria	0	0	0	73.857
Alkalibacterium kapii FAM208 38	Firmicutes	Weissella cibaria 3386	Firmicutes	0	0	0	74.956
Alkalibacterium kapii FAM208 38	Firmicutes	Sphingobacterium faecium PCAiF2.5	g-Proteobacteria	0	0	0	68.986
Alkalibacterium kapii FAM208 38	Firmicutes	Brachybacterium alimentarium 908.11	Actinobacteria	0	0	0	74.029
Alkalibacterium kapii FAM208 38	Firmicutes	Corynebacterium variabile	Actinobacteria	0	0	0	74.052
Alkalibacterium kapii FAM208 38	Firmicutes	Corynebacterium stationis CRBM6	Actinobacteria	0	0	0	65
Alkalibacterium kapii FAM208 38	Firmicutes	Brevibacterium linens 341.13	Actinobacteria	0	0	0	74.849
Alkalibacterium kapii FAM208 38	Firmicutes	Morganella psychrotolerans 925	g-Proteobacteria	0	0	0	77.347
Alkalibacterium kapii FAM208 38	Firmicutes	Raoultella planticola 3M45	g-Proteobacteria	0	0	0	77.54
Alkalibacterium kapii FAM208 38	Firmicutes	Lactococcus raffinolactis NCDO617	Firmicutes	0	0	0	85.714
Alkalibacterium kapii FAM208 38	Firmicutes	Streptococcus infantarius subsp. infantarius 3AG	Firmicutes	0	0	0	86.842
Alkalibacterium kapii FAM208 38	Firmicutes	Citrococcus sp. ws2216	Actinobacteria	0	0	0	76.531
Alkalibacterium kapii FAM208 38	Firmicutes	Brevibacterium iodinum ATCC 49514	Actinobacteria	0	0	0	74.071
Alkalibacterium kapii FAM208 38	Firmicutes	Leucobacter komagatae 1L36	Actinobacteria	0	0	0	73.812
Alkalibacterium kapii FAM208 38	Firmicutes	Halomonas venusta 3A7M	g-Proteobacteria	0	0	0	78.197
Alkalibacterium kapii FAM208 38	Firmicutes	Microbacterium sp. JB110	Actinobacteria	10	8781	0	75.345
Alkalibacterium kapii FAM208 38	Firmicutes	Pseudoalteromonas sp JB197	g-Proteobacteria	0	0	0	76.73
Alkalibacterium kapii FAM208 38	Firmicutes	Enterococcus malodoratus FAM208 55	Firmicutes	0	0	0	87.121
Alkalibacterium kapii FAM208 38	Firmicutes	Enterococcus hirae SB10	Firmicutes	0	0	0	86.032
Alkalibacterium kapii FAM208 38	Firmicutes	Halomonas sp JB37	g-Proteobacteria	0	0	0	77.568
Alkalibacterium kapii FAM208 38	Firmicutes	Macrococcus caseolyticus ATCC 13458	Firmicutes	0	0	0	89.683
Alkalibacterium kapii FAM208 38	Firmicutes	Brevibacterium linens 947.7	Actinobacteria	1	506	0	74.763
Alkalibacterium kapii FAM208 38	Firmicutes	Jeotgalicoccus psychrophilus CRBMD21	Firmicutes	0	0	0	86.054
Alkalibacterium kapii FAM208 38	Firmicutes	Brevibacterium linens JB5	Actinobacteria	10	8781	0	74.849
Alkalibacterium kapii FAM208 38	Firmicutes	Delftia acidovorans PCA12	g-Proteobacteria	0	0	0	74.135
Alkalibacterium kapii FAM208 38	Firmicutes	Pseudomonas pseudojaponica PCAi6.5	g-Proteobacteria	0	0	0	76.23
Alkalibacterium kapii FAM208 38	Firmicutes	Bacillus fordii CIP 108821	Firmicutes	0	0	0	88.889
Alkalibacterium kapii FAM208 38	Firmicutes	Leuconostoc citreum MSE2	Firmicutes	0	0	0	79.016
Alkalibacterium kapii FAM208 38	Firmicutes	Morganella morganii subsp. siboni 3A5A	g-Proteobacteria	0	0	0	77.333
Alkalibacterium kapii FAM208 38	Firmicutes	Brachybacterium alimentarium 962.10	Actinobacteria	4	3762	0	74.029
Alkalibacterium kapii FAM208 38	Firmicutes	Lactococcus garvieae N201	Firmicutes	0	0	0	82.225
Alkalibacterium kapii FAM208 38	Firmicutes	Brevibacillus parabrevis CIP 110335	Firmicutes	0	0	0	85.163
Alkalibacterium kapii FAM208 38	Firmicutes	Brachybacterium alimentarium 876.9	Actinobacteria	3	2832	0	74.029
Alkalibacterium kapii FAM208 38	Firmicutes	Staphylococcus xylosus	Firmicutes	0	0	0	87.179
Alkalibacterium kapii FAM208 38	Firmicutes	Chryseobacterium joostei PCAiD6.3	g-Proteobacteria	0	0	0	71.518
Alkalibacterium kapii FAM208 38	Firmicutes	Microbacterium oxydans PCA1	Actinobacteria	0	0	0	72.548
Alkalibacterium kapii FAM208 38	Firmicutes	Exiguobacterium acetylicum 180	Firmicutes	0	0	0	84.038
Alkalibacterium kapii FAM208 38	Firmicutes	Corynebacterium variabile DSM 44702	Actinobacteria	0	0	0	73.512
Alkalibacterium kapii FAM208 38	Firmicutes	Enterococcus durans LMG10746	Firmicutes	0	0	0	86.2
Alkalibacterium kapii FAM208 38	Firmicutes	Stenotrophomonas rhizophila PCA13	g-Proteobacteria	0	0	0	78.407
Alkalibacterium kapii FAM208 38	Firmicutes	Chryseobacterium ginsengisoli M17	g-Proteobacteria	0	0	0	69.508
Alkalibacterium kapii FAM208 38	Firmicutes	Bacillus galactosidilyticus CIP 108417	Firmicutes	0	0	0	90.247
Alkalibacterium kapii FAM208 38	Firmicutes	Chryseobacterium vrystaatense PCAIF2.7	g-Proteobacteria	0	0	0	74.224
Alkalibacterium kapii FAM208 38	Firmicutes	Raoultella ornithinolytica TL332	g-Proteobacteria	0	0	0	73.394
Alkalibacterium kapii FAM208 38	Firmicutes	Glutamicibacter arilaitensis GMPA29	Actinobacteria	0	0	0	70.939
Alkalibacterium kapii FAM208 38	Firmicutes	Microbacterium gubbeenense DSM 15944	Actinobacteria	0	0	0	75.086
Alkalibacterium kapii FAM208 38	Firmicutes	Corynebacterium casei JB4	Actinobacteria	5	5214	0	73.425
Alkalibacterium kapii FAM208 38	Firmicutes	Staphylococcus fleuretti CIP106114	Firmicutes	0	0	0	89.255
Alkalibacterium kapii FAM208 38	Firmicutes	Vagococcus fluvialis bH819	Firmicutes	0	0	0	87.27
Alkalibacterium kapii FAM208 38	Firmicutes	Providencia heimbachae GR4	g-Proteobacteria	0	0	0	76.866
Alkalibacterium kapii FAM208 38	Firmicutes	Pantoea agglomerans PCAiQ6.3	g-Proteobacteria	0	0	0	74.096
Alkalibacterium kapii FAM208 38	Firmicutes	Agrococcus casei LMG22410	Actinobacteria	0	0	0	75.026
Alkalibacterium kapii FAM208 38	Firmicutes	Psychrobacter faecalis H5	g-Proteobacteria	0	0	0	76.691
Alkalibacterium kapii FAM208 38	Firmicutes	Kocuria carniphila CRBM38	Actinobacteria	0	0	0	74.956
Alkalibacterium kapii FAM208 38	Firmicutes	Lactobacillus casei BD-II	Firmicutes	0	0	0	86.007
Alkalibacterium kapii FAM208 38	Firmicutes	Comamonas testosteroni NL2512	g-Proteobacteria	0	0	0	71.601
Alkalibacterium kapii FAM208 38	Firmicutes	Pseudomonas psychrophila 1E44	g-Proteobacteria	0	0	0	79.144
Alkalibacterium kapii FAM208 38	Firmicutes	Alcaligenes faecalis 2L10	g-Proteobacteria	0	0	0	76.31
Alkalibacterium kapii FAM208 38	Firmicutes	Staphylococcus caprae DSM 20608	Firmicutes	0	0	0	90.147
Alkalibacterium kapii FAM208 38	Firmicutes	Brachybacterium alimentarium 900.8	Actinobacteria	2	1815	0	74.029
Alkalibacterium kapii FAM208 38	Firmicutes	Streptococcus salivarius CJ181	Firmicutes	0	0	0	85.589
Alkalibacterium kapii FAM208 38	Firmicutes	Psychrobacter immobilis PG1	g-Proteobacteria	0	0	0	76.471
Alkalibacterium kapii FAM208 38	Firmicutes	Brevibacterium linens 962.8	Actinobacteria	0	0	0	74.763
Alkalibacterium kapii FAM208 38	Firmicutes	Glutamicibacter sp. BW78	Actinobacteria	0	0	0	74.828
Alkalibacterium kapii FAM208 38	Firmicutes	Bacillus pumilus M21	Firmicutes	0	0	0	88.316
Alkalibacterium kapii FAM208 38	Firmicutes	Streptococcus infantarius 11FA	Firmicutes	0	0	0	87.158
Alkalibacterium kapii FAM208 38	Firmicutes	Stenotrophomonas indologenes PCAi2.2	g-Proteobacteria	0	0	0	75.498
Alkalibacterium kapii FAM208 38	Firmicutes	Staphylococcus equorum BC9	Firmicutes	0	0	0	85.566
Alkalibacterium kapii FAM208 38	Firmicutes	Brevibacterium linens 908.7	Actinobacteria	8	7824	0	74.763
Alkalibacterium kapii FAM208 38	Firmicutes	Brochothrix thermosphacta cH814	Firmicutes	0	0	0	87.408
Alkalibacterium kapii FAM208 38	Firmicutes	Leucobacter sp. ER15 166 BHI15	Actinobacteria	0	0	0	72.387
Alkalibacterium kapii FAM208 38	Firmicutes	Facklamia tabacinasalis FAM208 56	Firmicutes	0	0	0	89.486
Alkalibacterium kapii FAM208 38	Firmicutes	Enterococcus saccharominimus M17 423	Firmicutes	0	0	0	87.691
Alkalibacterium kapii FAM208 38	Firmicutes	Brevibacterium antiquum CNRZ918	Actinobacteria	0	0	0	75.669
Alkalibacterium kapii FAM208 38	Firmicutes	Sphingobacterium sp JB170	g-Proteobacteria	0	0	0	70.396
Alkalibacterium kapii FAM208 38	Firmicutes	Chryseobacterium shigense PCAiB2.3	g-Proteobacteria	0	0	0	71.518
Alkalibacterium kapii FAM208 38	Firmicutes	Vagococcus lutrae FAM208	Firmicutes	0	0	0	91.922
Alkalibacterium kapii FAM208 38	Firmicutes	Staphylococcus vitulinus Ma1	Firmicutes	0	0	0	91.062
Alkalibacterium kapii FAM208 38	Firmicutes	Lactobacillus brevis KB290	Firmicutes	0	0	0	85.287
Alkalibacterium kapii FAM208 38	Firmicutes	Psychrobacter sp JB193	g-Proteobacteria	0	0	0	76.576
Alkalibacterium kapii FAM208 38	Firmicutes	Halomonas venusta 3F2F	g-Proteobacteria	0	0	0	78.637
Alkalibacterium kapii FAM208 38	Firmicutes	Paenibacillus sp. 3M17	Firmicutes	0	0	0	87.01
Alkalibacterium kapii FAM208 38	Firmicutes	Serratia proteamaculans 1C2F	g-Proteobacteria	0	0	0	76.479
Alkalibacterium kapii FAM208 38	Firmicutes	Glutamicibacter arilaitensis Re117	Actinobacteria	7	6383	0	75.669
Alkalibacterium kapii FAM208 38	Firmicutes	Lactobacillus brevis ATCC 367	Firmicutes	0	0	0	85.287
Alkalibacterium kapii FAM208 38	Firmicutes	Citrobacter freundii Pi15	g-Proteobacteria	0	0	0	75.682
Alkalibacterium kapii FAM208 38	Firmicutes	Propionibacterium thoenii LSPTH1	Actinobacteria	0	0	0	74.976
Alkalibacterium kapii FAM208 38	Firmicutes	Glutamicibacter arilaitensis 3M03	Actinobacteria	8	7764	0	74.681
Alkalibacterium kapii FAM208 38	Firmicutes	Brevibacterium linens ATCC 9172	Actinobacteria	0	0	0	74.976
Alkalibacterium kapii FAM208 38	Firmicutes	Weissella cibaria 3385	Firmicutes	0	0	0	76.625
Alkalibacterium kapii FAM208 38	Firmicutes	Rothia mucilaginosa M1710	Actinobacteria	0	0	0	73.003
Alkalibacterium kapii FAM208 38	Firmicutes	Brachybacterium alimentarium 341.9	Actinobacteria	3	2790	0	74.029
Alkalibacterium kapii FAM208 38	Firmicutes	Brevibacterium casei S18	Actinobacteria	0	0	0	76.223
Alkalibacterium kapii FAM208 38	Firmicutes	Pseudomonas fragi 1E26	g-Proteobacteria	0	0	0	79.813
Alkalibacterium kapii FAM208 38	Firmicutes	Enterobacter amnigenus CV9	g-Proteobacteria	0	0	0	73.471
Alkalibacterium kapii FAM208 38	Firmicutes	Carnobacterium maltaromaticum 38b	Firmicutes	0	0	0	89.465
Alkalibacterium kapii FAM208 38	Firmicutes	Glutamicibacter arilaitensis JB182	Actinobacteria	14	11639	0	75.669
Alkalibacterium kapii FAM208 38	Firmicutes	Psychrobacter namhaensis 1439	g-Proteobacteria	0	0	0	77.166
Alkalibacterium kapii FAM208 38	Firmicutes	Micrococcus luteus Mu201	Actinobacteria	0	0	0	76.445
Alkalibacterium kapii FAM208 38	Firmicutes	Pediococcus parvulus CIRM750	Actinobacteria	0	0	0	76.445
Alkalibacterium kapii FAM208 38	Firmicutes	Exiguobacterium sibiricum NL255	Firmicutes	2	3354	0	87.015
Alkalibacterium kapii FAM208 38	Firmicutes	Acinetobacter johnsonii 3M05	g-Proteobacteria	0	0	0	77.047
Alkalibacterium kapii FAM208 38	Firmicutes	Lactobacillus crustorum FH4	Firmicutes	0	0	0	84.372
Alkalibacterium kapii FAM208 38	Firmicutes	Serratia marescens 448	g-Proteobacteria	0	0	0	78.658
Alkalibacterium kapii FAM208 38	Firmicutes	Staphylococcus equorum BC15	Firmicutes	0	0	0	85.739
Alkalibacterium kapii FAM208 38	Firmicutes	Stenotrophomonas maltophilia Pi1	g-Proteobacteria	0	0	0	76.178
Alkalibacterium kapii FAM208 38	Firmicutes	Listeria monocytogenes str. Scott A	Firmicutes	0	0	0	87.543
Alkalibacterium kapii FAM208 38	Firmicutes	Brachybacterium alimentarium 862.8	Actinobacteria	3	2910	0	74.029
Alkalibacterium kapii FAM208 38	Firmicutes	Brevibacterium casei CIP 102111	Actinobacteria	0	0	0	73.214
Alkalibacterium kapii FAM208 38	Firmicutes	Brevibacterium linens 738.8	Actinobacteria	0	0	0	74.763
Alkalibacterium kapii FAM208 38	Firmicutes	Mycobacterium vaccae CIP 105934	Actinobacteria	0	0	0	73.304
Alkalibacterium kapii FAM208 38	Firmicutes	Proteus vulgaris 1M25	g-Proteobacteria	0	0	0	77.778
Alkalibacterium kapii FAM208 38	Firmicutes	Leuconostoc mesenteroides CNRZ1283	Firmicutes	0	0	0	81.524
Alkalibacterium kapii FAM208 38	Firmicutes	Brachybacterium alimentarium 947.11	Actinobacteria	1	945	0	74.029
Alkalibacterium kapii FAM208 38	Firmicutes	Streptococcus macedonicus 679	Firmicutes	0	0	0	83.333
Alkalibacterium kapii FAM208 38	Firmicutes	Staphylococcus warneri 1445	Firmicutes	0	0	0	87.616
Alkalibacterium kapii FAM208 38	Firmicutes	Providencia rettgeri 947	g-Proteobacteria	0	0	0	76.591
Alkalibacterium kapii FAM208 38	Firmicutes	Proteus hauseri 1M10	g-Proteobacteria	0	0	0	77.708
Alkalibacterium kapii FAM208 38	Firmicutes	Vibrio litoralis B4	g-Proteobacteria	0	0	0	78.302
Alkalibacterium kapii FAM208 38	Firmicutes	Providencia alcalifaciens GM3	g-Proteobacteria	0	0	0	75.369
Listeria fleischmannii subsp. fleischmannii LU2006-1	Firmicutes	Alcaligenes sp. 2L29	g-Proteobacteria	0	0	0	75.939
Listeria fleischmannii subsp. fleischmannii LU2006-1	Firmicutes	Paenibacillus lactis CIP 108827	Firmicutes	0	0	0	88.288
Listeria fleischmannii subsp. fleischmannii LU2006-1	Firmicutes	Corynebacterium ammoniagenes ws2211	Actinobacteria	0	0	0	78.571
Listeria fleischmannii subsp. fleischmannii LU2006-1	Firmicutes	Brachybacterium alimentarium 738.10	Actinobacteria	0	0	0	75.588
Listeria fleischmannii subsp. fleischmannii LU2006-1	Firmicutes	Halomonas sp. 1M45	g-Proteobacteria	0	0	0	77.293
Listeria fleischmannii subsp. fleischmannii LU2006-1	Firmicutes	Brevibacterium linens BL2	Actinobacteria	0	0	0	77.263
Listeria fleischmannii subsp. fleischmannii LU2006-1	Firmicutes	Pseudomonas lundensis PCAiD2.2	g-Proteobacteria	0	0	0	83.588
Listeria fleischmannii subsp. fleischmannii LU2006-1	Firmicutes	Brevibacterium linens 876.7	Actinobacteria	0	0	0	77.263
Listeria fleischmannii subsp. fleischmannii LU2006-1	Firmicutes	Brevibacterium linens 900.6	Actinobacteria	0	0	0	77.263
Listeria fleischmannii subsp. fleischmannii LU2006-1	Firmicutes	Psychrobacter aquimaris ER15 174 BHI7	g-Proteobacteria	0	0	0	76.593
Listeria fleischmannii subsp. fleischmannii LU2006-1	Firmicutes	Glutamicibacter sp. BW80	Actinobacteria	0	0	0	77.088
Listeria fleischmannii subsp. fleischmannii LU2006-1	Firmicutes	Leuconostoc pseudomesenteroides MSE7	Firmicutes	0	0	0	83.6
Listeria fleischmannii subsp. fleischmannii LU2006-1	Firmicutes	Pseudomonas fluorescens PCAiD6.2	g-Proteobacteria	0	0	0	77.77
Listeria fleischmannii subsp. fleischmannii LU2006-1	Firmicutes	Bavariicoccus seileri ws4188	Firmicutes	0	0	0	90.714
Listeria fleischmannii subsp. fleischmannii LU2006-1	Firmicutes	Ornithinibacillus bavariensis CIP 109287	Firmicutes	0	0	0	93.428
Listeria fleischmannii subsp. fleischmannii LU2006-1	Firmicutes	Bacillus altitudinis 263	Firmicutes	0	0	0	94.437
Listeria fleischmannii subsp. fleischmannii LU2006-1	Firmicutes	Brachybacterium alimentarium JB7	Actinobacteria	0	0	0	75.588
Listeria fleischmannii subsp. fleischmannii LU2006-1	Firmicutes	Kluyvera intermedia TL336A	g-Proteobacteria	0	0	0	75.355
Listeria fleischmannii subsp. fleischmannii LU2006-1	Firmicutes	Corynebacterium flavescens Mu128	Actinobacteria	0	0	0	76.255
Listeria fleischmannii subsp. fleischmannii LU2006-1	Firmicutes	Glutamicibacter arilaitensis Ca106	Actinobacteria	0	0	0	76.075
Listeria fleischmannii subsp. fleischmannii LU2006-1	Firmicutes	Propionibacterium acidipropinicii LSPAc1	Actinobacteria	0	0	0	70.05
Listeria fleischmannii subsp. fleischmannii LU2006-1	Firmicutes	Serratia rubidaea TA 26	g-Proteobacteria	0	0	0	74.526
Listeria fleischmannii subsp. fleischmannii LU2006-1	Firmicutes	Psychrobacter celer 91	g-Proteobacteria	0	0	0	78.756
Listeria fleischmannii subsp. fleischmannii LU2006-1	Firmicutes	Luteococcus japonicus LSP Lj1	Actinobacteria	0	0	0	73.677
Listeria fleischmannii subsp. fleischmannii LU2006-1	Firmicutes	Brevibacterium linens 862.7	Actinobacteria	0	0	0	77.263
Listeria fleischmannii subsp. fleischmannii LU2006-1	Firmicutes	Klebsiella oxytoca Pi20	g-Proteobacteria	0	0	0	75.722
Listeria fleischmannii subsp. fleischmannii LU2006-1	Firmicutes	Chryseobacterium bovis Pi18	g-Proteobacteria	0	0	0	73.016
Listeria fleischmannii subsp. fleischmannii LU2006-1	Firmicutes	Staphylococcus lentus Ca2	Firmicutes	0	0	0	90.497
Listeria fleischmannii subsp. fleischmannii LU2006-1	Firmicutes	Halomonas venusta 3D7M	g-Proteobacteria	0	0	0	78.621
Listeria fleischmannii subsp. fleischmannii LU2006-1	Firmicutes	Lactobacillus casei ATCC 334 (Lactobacillus paracasei ATCC 334)	Firmicutes	0	0	0	87.864
Listeria fleischmannii subsp. fleischmannii LU2006-1	Firmicutes	Corynebacterium casei UCMA 3821	Actinobacteria	0	0	0	76.902
Listeria fleischmannii subsp. fleischmannii LU2006-1	Firmicutes	Propionibacterium freudenreichii subsp. shermanii CIRM-BIA1	Actinobacteria	0	0	0	74.928
Listeria fleischmannii subsp. fleischmannii LU2006-1	Firmicutes	Acinetobacter genospecies 3 PCAiE6.10	g-Proteobacteria	0	0	0	79.924
Listeria fleischmannii subsp. fleischmannii LU2006-1	Firmicutes	Kocuria varians Mu208	Actinobacteria	0	0	0	77.335
Listeria fleischmannii subsp. fleischmannii LU2006-1	Firmicutes	Brachybacterium alimentarium CNRZ925	Actinobacteria	0	0	0	75.38
Listeria fleischmannii subsp. fleischmannii LU2006-1	Firmicutes	Weissella cibaria 3386	Firmicutes	0	0	0	76.073
Listeria fleischmannii subsp. fleischmannii LU2006-1	Firmicutes	Sphingobacterium faecium PCAiF2.5	g-Proteobacteria	0	0	0	71.646
Listeria fleischmannii subsp. fleischmannii LU2006-1	Firmicutes	Brachybacterium alimentarium 908.11	Actinobacteria	0	0	0	75.588
Listeria fleischmannii subsp. fleischmannii LU2006-1	Firmicutes	Corynebacterium variabile	Actinobacteria	0	0	0	76.918
Listeria fleischmannii subsp. fleischmannii LU2006-1	Firmicutes	Corynebacterium stationis CRBM6	Actinobacteria	0	0	0	68.799
Listeria fleischmannii subsp. fleischmannii LU2006-1	Firmicutes	Brevibacterium linens 341.13	Actinobacteria	0	0	0	77.332
Listeria fleischmannii subsp. fleischmannii LU2006-1	Firmicutes	Morganella psychrotolerans 925	g-Proteobacteria	0	0	0	77.817
Listeria fleischmannii subsp. fleischmannii LU2006-1	Firmicutes	Raoultella planticola 3M45	g-Proteobacteria	0	0	0	77.674
Listeria fleischmannii subsp. fleischmannii LU2006-1	Firmicutes	Lactococcus raffinolactis NCDO617	Firmicutes	0	0	0	86.9
Listeria fleischmannii subsp. fleischmannii LU2006-1	Firmicutes	Streptococcus infantarius subsp. infantarius 3AG	Firmicutes	0	0	0	87.368
Listeria fleischmannii subsp. fleischmannii LU2006-1	Firmicutes	Citrococcus sp. ws2216	Actinobacteria	0	0	0	76.442
Listeria fleischmannii subsp. fleischmannii LU2006-1	Firmicutes	Brevibacterium iodinum ATCC 49514	Actinobacteria	0	0	0	76.51
Listeria fleischmannii subsp. fleischmannii LU2006-1	Firmicutes	Leucobacter komagatae 1L36	Actinobacteria	0	0	0	74.449
Listeria fleischmannii subsp. fleischmannii LU2006-1	Firmicutes	Halomonas venusta 3A7M	g-Proteobacteria	0	0	0	78.621
Listeria fleischmannii subsp. fleischmannii LU2006-1	Firmicutes	Microbacterium sp. JB110	Actinobacteria	0	0	0	76.918
Listeria fleischmannii subsp. fleischmannii LU2006-1	Firmicutes	Pseudoalteromonas sp JB197	g-Proteobacteria	0	0	0	76.887
Listeria fleischmannii subsp. fleischmannii LU2006-1	Firmicutes	Enterococcus malodoratus FAM208 55	Firmicutes	0	0	0	93.06
Listeria fleischmannii subsp. fleischmannii LU2006-1	Firmicutes	Enterococcus hirae SB10	Firmicutes	0	0	0	92.326
Listeria fleischmannii subsp. fleischmannii LU2006-1	Firmicutes	Halomonas sp JB37	g-Proteobacteria	0	0	0	77.432
Listeria fleischmannii subsp. fleischmannii LU2006-1	Firmicutes	Macrococcus caseolyticus ATCC 13458	Firmicutes	0	0	0	91.481
Listeria fleischmannii subsp. fleischmannii LU2006-1	Firmicutes	Brevibacterium linens 947.7	Actinobacteria	0	0	0	77.263
Listeria fleischmannii subsp. fleischmannii LU2006-1	Firmicutes	Jeotgalicoccus psychrophilus CRBMD21	Firmicutes	0	0	0	88.361
Listeria fleischmannii subsp. fleischmannii LU2006-1	Firmicutes	Brevibacterium linens JB5	Actinobacteria	0	0	0	77.332
Listeria fleischmannii subsp. fleischmannii LU2006-1	Firmicutes	Delftia acidovorans PCA12	g-Proteobacteria	0	0	0	74.765
Listeria fleischmannii subsp. fleischmannii LU2006-1	Firmicutes	Pseudomonas pseudojaponica PCAi6.5	g-Proteobacteria	0	0	0	77.466
Listeria fleischmannii subsp. fleischmannii LU2006-1	Firmicutes	Bacillus fordii CIP 108821	Firmicutes	0	0	0	91.077
Listeria fleischmannii subsp. fleischmannii LU2006-1	Firmicutes	Leuconostoc citreum MSE2	Firmicutes	0	0	0	79.719
Listeria fleischmannii subsp. fleischmannii LU2006-1	Firmicutes	Morganella morganii subsp. siboni 3A5A	g-Proteobacteria	0	0	0	78.8
Listeria fleischmannii subsp. fleischmannii LU2006-1	Firmicutes	Brachybacterium alimentarium 962.10	Actinobacteria	0	0	0	75.588
Listeria fleischmannii subsp. fleischmannii LU2006-1	Firmicutes	Lactococcus garvieae N201	Firmicutes	0	0	0	82.114
Listeria fleischmannii subsp. fleischmannii LU2006-1	Firmicutes	Brevibacillus parabrevis CIP 110335	Firmicutes	0	0	0	87.674
Listeria fleischmannii subsp. fleischmannii LU2006-1	Firmicutes	Brachybacterium alimentarium 876.9	Actinobacteria	0	0	0	75.588
Listeria fleischmannii subsp. fleischmannii LU2006-1	Firmicutes	Staphylococcus xylosus	Firmicutes	0	0	0	88.991
Listeria fleischmannii subsp. fleischmannii LU2006-1	Firmicutes	Chryseobacterium joostei PCAiD6.3	g-Proteobacteria	0	0	0	72.395
Listeria fleischmannii subsp. fleischmannii LU2006-1	Firmicutes	Microbacterium oxydans PCA1	Actinobacteria	0	0	0	73.953
Listeria fleischmannii subsp. fleischmannii LU2006-1	Firmicutes	Exiguobacterium acetylicum 180	Firmicutes	0	0	0	87.902
Listeria fleischmannii subsp. fleischmannii LU2006-1	Firmicutes	Corynebacterium variabile DSM 44702	Actinobacteria	0	0	0	76.487
Listeria fleischmannii subsp. fleischmannii LU2006-1	Firmicutes	Enterococcus durans LMG10746	Firmicutes	0	0	0	91.859
Listeria fleischmannii subsp. fleischmannii LU2006-1	Firmicutes	Stenotrophomonas rhizophila PCA13	g-Proteobacteria	0	0	0	80.62
Listeria fleischmannii subsp. fleischmannii LU2006-1	Firmicutes	Chryseobacterium ginsengisoli M17	g-Proteobacteria	0	0	0	69.122
Listeria fleischmannii subsp. fleischmannii LU2006-1	Firmicutes	Bacillus galactosidilyticus CIP 108417	Firmicutes	0	0	0	91.592
Listeria fleischmannii subsp. fleischmannii LU2006-1	Firmicutes	Chryseobacterium vrystaatense PCAIF2.7	g-Proteobacteria	0	0	0	76.876
Listeria fleischmannii subsp. fleischmannii LU2006-1	Firmicutes	Raoultella ornithinolytica TL332	g-Proteobacteria	0	0	0	73.607
Listeria fleischmannii subsp. fleischmannii LU2006-1	Firmicutes	Glutamicibacter arilaitensis GMPA29	Actinobacteria	0	0	0	72.727
Listeria fleischmannii subsp. fleischmannii LU2006-1	Firmicutes	Microbacterium gubbeenense DSM 15944	Actinobacteria	0	0	0	77.417
Listeria fleischmannii subsp. fleischmannii LU2006-1	Firmicutes	Corynebacterium casei JB4	Actinobacteria	0	0	0	76.902
Listeria fleischmannii subsp. fleischmannii LU2006-1	Firmicutes	Staphylococcus fleuretti CIP106114	Firmicutes	0	0	0	90.815
Listeria fleischmannii subsp. fleischmannii LU2006-1	Firmicutes	Vagococcus fluvialis bH819	Firmicutes	0	0	0	89.674
Listeria fleischmannii subsp. fleischmannii LU2006-1	Firmicutes	Providencia heimbachae GR4	g-Proteobacteria	0	0	0	78.133
Listeria fleischmannii subsp. fleischmannii LU2006-1	Firmicutes	Pantoea agglomerans PCAiQ6.3	g-Proteobacteria	0	0	0	74.309
Listeria fleischmannii subsp. fleischmannii LU2006-1	Firmicutes	Agrococcus casei LMG22410	Actinobacteria	0	0	0	75.437
Listeria fleischmannii subsp. fleischmannii LU2006-1	Firmicutes	Psychrobacter faecalis H5	g-Proteobacteria	0	0	0	77.053
Listeria fleischmannii subsp. fleischmannii LU2006-1	Firmicutes	Kocuria carniphila CRBM38	Actinobacteria	0	0	0	76.073
Listeria fleischmannii subsp. fleischmannii LU2006-1	Firmicutes	Lactobacillus casei BD-II	Firmicutes	0	0	0	87.864
Listeria fleischmannii subsp. fleischmannii LU2006-1	Firmicutes	Comamonas testosteroni NL2512	g-Proteobacteria	0	0	0	74.339
Listeria fleischmannii subsp. fleischmannii LU2006-1	Firmicutes	Pseudomonas psychrophila 1E44	g-Proteobacteria	0	0	0	80.749
Listeria fleischmannii subsp. fleischmannii LU2006-1	Firmicutes	Alcaligenes faecalis 2L10	g-Proteobacteria	0	0	0	77.5
Listeria fleischmannii subsp. fleischmannii LU2006-1	Firmicutes	Staphylococcus caprae DSM 20608	Firmicutes	0	0	0	90.338
Listeria fleischmannii subsp. fleischmannii LU2006-1	Firmicutes	Brachybacterium alimentarium 900.8	Actinobacteria	0	0	0	75.588
Listeria fleischmannii subsp. fleischmannii LU2006-1	Firmicutes	Streptococcus salivarius CJ181	Firmicutes	0	0	0	86.116
Listeria fleischmannii subsp. fleischmannii LU2006-1	Firmicutes	Psychrobacter immobilis PG1	g-Proteobacteria	0	0	0	78.325
Listeria fleischmannii subsp. fleischmannii LU2006-1	Firmicutes	Brevibacterium linens 962.8	Actinobacteria	0	0	0	77.263
Listeria fleischmannii subsp. fleischmannii LU2006-1	Firmicutes	Glutamicibacter sp. BW78	Actinobacteria	0	0	0	78.108
Listeria fleischmannii subsp. fleischmannii LU2006-1	Firmicutes	Bacillus pumilus M21	Firmicutes	0	0	0	91.486
Listeria fleischmannii subsp. fleischmannii LU2006-1	Firmicutes	Streptococcus infantarius 11FA	Firmicutes	0	0	0	87.671
Listeria fleischmannii subsp. fleischmannii LU2006-1	Firmicutes	Stenotrophomonas indologenes PCAi2.2	g-Proteobacteria	0	0	0	76.717
Listeria fleischmannii subsp. fleischmannii LU2006-1	Firmicutes	Staphylococcus equorum BC9	Firmicutes	0	0	0	89.051
Listeria fleischmannii subsp. fleischmannii LU2006-1	Firmicutes	Brevibacterium linens 908.7	Actinobacteria	0	0	0	77.263
Listeria fleischmannii subsp. fleischmannii LU2006-1	Firmicutes	Brochothrix thermosphacta cH814	Firmicutes	0	0	0	91.624
Listeria fleischmannii subsp. fleischmannii LU2006-1	Firmicutes	Leucobacter sp. ER15 166 BHI15	Actinobacteria	0	0	0	73.675
Listeria fleischmannii subsp. fleischmannii LU2006-1	Firmicutes	Facklamia tabacinasalis FAM208 56	Firmicutes	0	0	0	88.571
Listeria fleischmannii subsp. fleischmannii LU2006-1	Firmicutes	Enterococcus saccharominimus M17 423	Firmicutes	0	0	0	90.882
Listeria fleischmannii subsp. fleischmannii LU2006-1	Firmicutes	Brevibacterium antiquum CNRZ918	Actinobacteria	0	0	0	76.858
Listeria fleischmannii subsp. fleischmannii LU2006-1	Firmicutes	Sphingobacterium sp JB170	g-Proteobacteria	0	0	0	71.923
Listeria fleischmannii subsp. fleischmannii LU2006-1	Firmicutes	Chryseobacterium shigense PCAiB2.3	g-Proteobacteria	0	0	0	73.017
Listeria fleischmannii subsp. fleischmannii LU2006-1	Firmicutes	Vagococcus lutrae FAM208	Firmicutes	0	0	0	93.593
Listeria fleischmannii subsp. fleischmannii LU2006-1	Firmicutes	Staphylococcus vitulinus Ma1	Firmicutes	0	0	0	92.098
Listeria fleischmannii subsp. fleischmannii LU2006-1	Firmicutes	Lactobacillus brevis KB290	Firmicutes	0	0	0	88.218
Listeria fleischmannii subsp. fleischmannii LU2006-1	Firmicutes	Psychrobacter sp JB193	g-Proteobacteria	0	0	0	78.176
Listeria fleischmannii subsp. fleischmannii LU2006-1	Firmicutes	Halomonas venusta 3F2F	g-Proteobacteria	0	0	0	77.714
Listeria fleischmannii subsp. fleischmannii LU2006-1	Firmicutes	Paenibacillus sp. 3M17	Firmicutes	0	0	0	87.906
Listeria fleischmannii subsp. fleischmannii LU2006-1	Firmicutes	Serratia proteamaculans 1C2F	g-Proteobacteria	0	0	0	76.479
Listeria fleischmannii subsp. fleischmannii LU2006-1	Firmicutes	Glutamicibacter arilaitensis Re117	Actinobacteria	0	0	0	77.433
Listeria fleischmannii subsp. fleischmannii LU2006-1	Firmicutes	Lactobacillus brevis ATCC 367	Firmicutes	0	0	0	88.218
Listeria fleischmannii subsp. fleischmannii LU2006-1	Firmicutes	Citrobacter freundii Pi15	g-Proteobacteria	0	0	0	75.598
Listeria fleischmannii subsp. fleischmannii LU2006-1	Firmicutes	Propionibacterium thoenii LSPTH1	Actinobacteria	0	0	0	75.641
Listeria fleischmannii subsp. fleischmannii LU2006-1	Firmicutes	Glutamicibacter arilaitensis 3M03	Actinobacteria	0	0	0	76.075
Listeria fleischmannii subsp. fleischmannii LU2006-1	Firmicutes	Brevibacterium linens ATCC 9172	Actinobacteria	0	0	0	75.657
Listeria fleischmannii subsp. fleischmannii LU2006-1	Firmicutes	Weissella cibaria 3385	Firmicutes	0	0	0	79.483
Listeria fleischmannii subsp. fleischmannii LU2006-1	Firmicutes	Rothia mucilaginosa M1710	Actinobacteria	0	0	0	75.344
Listeria fleischmannii subsp. fleischmannii LU2006-1	Firmicutes	Brachybacterium alimentarium 341.9	Actinobacteria	0	0	0	75.588
Listeria fleischmannii subsp. fleischmannii LU2006-1	Firmicutes	Brevibacterium casei S18	Actinobacteria	0	0	0	77.638
Listeria fleischmannii subsp. fleischmannii LU2006-1	Firmicutes	Pseudomonas fragi 1E26	g-Proteobacteria	0	0	0	80.882
Listeria fleischmannii subsp. fleischmannii LU2006-1	Firmicutes	Enterobacter amnigenus CV9	g-Proteobacteria	0	0	0	74.053
Listeria fleischmannii subsp. fleischmannii LU2006-1	Firmicutes	Carnobacterium maltaromaticum 38b	Firmicutes	0	0	0	90.123
Listeria fleischmannii subsp. fleischmannii LU2006-1	Firmicutes	Glutamicibacter arilaitensis JB182	Actinobacteria	0	0	0	77.433
Listeria fleischmannii subsp. fleischmannii LU2006-1	Firmicutes	Psychrobacter namhaensis 1439	g-Proteobacteria	0	0	0	77.986
Listeria fleischmannii subsp. fleischmannii LU2006-1	Firmicutes	Micrococcus luteus Mu201	Actinobacteria	0	0	0	76.978
Listeria fleischmannii subsp. fleischmannii LU2006-1	Firmicutes	Pediococcus parvulus CIRM750	Actinobacteria	0	0	0	76.978
Listeria fleischmannii subsp. fleischmannii LU2006-1	Firmicutes	Exiguobacterium sibiricum NL255	Firmicutes	0	0	0	88.751
Listeria fleischmannii subsp. fleischmannii LU2006-1	Firmicutes	Acinetobacter johnsonii 3M05	g-Proteobacteria	0	0	0	77.97
Listeria fleischmannii subsp. fleischmannii LU2006-1	Firmicutes	Lactobacillus crustorum FH4	Firmicutes	0	0	0	85.22
Listeria fleischmannii subsp. fleischmannii LU2006-1	Firmicutes	Serratia marescens 448	g-Proteobacteria	0	0	0	78.658
Listeria fleischmannii subsp. fleischmannii LU2006-1	Firmicutes	Staphylococcus equorum BC15	Firmicutes	0	0	0	89.397
Listeria fleischmannii subsp. fleischmannii LU2006-1	Firmicutes	Stenotrophomonas maltophilia Pi1	g-Proteobacteria	0	0	0	76.895
Listeria fleischmannii subsp. fleischmannii LU2006-1	Firmicutes	Brachybacterium alimentarium 862.8	Actinobacteria	0	0	0	75.588
Listeria fleischmannii subsp. fleischmannii LU2006-1	Firmicutes	Brevibacterium casei CIP 102111	Actinobacteria	0	0	0	74.435
Listeria fleischmannii subsp. fleischmannii LU2006-1	Firmicutes	Brevibacterium linens 738.8	Actinobacteria	0	0	0	77.263
Listeria fleischmannii subsp. fleischmannii LU2006-1	Firmicutes	Mycobacterium vaccae CIP 105934	Actinobacteria	0	0	0	75.597
Listeria fleischmannii subsp. fleischmannii LU2006-1	Firmicutes	Proteus vulgaris 1M25	g-Proteobacteria	0	0	0	77.897
Listeria fleischmannii subsp. fleischmannii LU2006-1	Firmicutes	Leuconostoc mesenteroides CNRZ1283	Firmicutes	0	0	0	85.192
Listeria fleischmannii subsp. fleischmannii LU2006-1	Firmicutes	Brachybacterium alimentarium 947.11	Actinobacteria	0	0	0	75.588
Listeria fleischmannii subsp. fleischmannii LU2006-1	Firmicutes	Streptococcus macedonicus 679	Firmicutes	0	0	0	85.098
Listeria fleischmannii subsp. fleischmannii LU2006-1	Firmicutes	Staphylococcus warneri 1445	Firmicutes	0	0	0	88.288
Listeria fleischmannii subsp. fleischmannii LU2006-1	Firmicutes	Providencia rettgeri 947	g-Proteobacteria	0	0	0	77.5
Listeria fleischmannii subsp. fleischmannii LU2006-1	Firmicutes	Proteus hauseri 1M10	g-Proteobacteria	0	0	0	78.652
Listeria fleischmannii subsp. fleischmannii LU2006-1	Firmicutes	Vibrio litoralis B4	g-Proteobacteria	0	0	0	79.224
Listeria fleischmannii subsp. fleischmannii LU2006-1	Firmicutes	Providencia alcalifaciens GM3	g-Proteobacteria	0	0	0	76.549
Alcaligenes sp. 2L29	g-Proteobacteria	Paenibacillus lactis CIP 108827	Firmicutes	0	0	0	78.342
Alcaligenes sp. 2L29	g-Proteobacteria	Corynebacterium ammoniagenes ws2211	Actinobacteria	0	0	0	74.781
Alcaligenes sp. 2L29	g-Proteobacteria	Brachybacterium alimentarium 738.10	Actinobacteria	0	0	0	76.932
Alcaligenes sp. 2L29	g-Proteobacteria	Halomonas sp. 1M45	g-Proteobacteria	0	0	0	82.491
Alcaligenes sp. 2L29	g-Proteobacteria	Brevibacterium linens BL2	Actinobacteria	0	0	0	75.293
Alcaligenes sp. 2L29	g-Proteobacteria	Pseudomonas lundensis PCAiD2.2	g-Proteobacteria	0	0	0	82.212
Alcaligenes sp. 2L29	g-Proteobacteria	Brevibacterium linens 876.7	Actinobacteria	0	0	0	75.176
Alcaligenes sp. 2L29	g-Proteobacteria	Brevibacterium linens 900.6	Actinobacteria	0	0	0	75.293
Alcaligenes sp. 2L29	g-Proteobacteria	Psychrobacter aquimaris ER15 174 BHI7	g-Proteobacteria	0	0	0	83.863
Alcaligenes sp. 2L29	g-Proteobacteria	Glutamicibacter sp. BW80	Actinobacteria	0	0	0	77.049
Alcaligenes sp. 2L29	g-Proteobacteria	Leuconostoc pseudomesenteroides MSE7	Firmicutes	0	0	0	74.648
Alcaligenes sp. 2L29	g-Proteobacteria	Pseudomonas fluorescens PCAiD6.2	g-Proteobacteria	0	0	0	82.277
Alcaligenes sp. 2L29	g-Proteobacteria	Bavariicoccus seileri ws4188	Firmicutes	0	0	0	75.615
Alcaligenes sp. 2L29	g-Proteobacteria	Ornithinibacillus bavariensis CIP 109287	Firmicutes	0	0	0	77.793
Alcaligenes sp. 2L29	g-Proteobacteria	Bacillus altitudinis 263	Firmicutes	0	0	0	77.279
Alcaligenes sp. 2L29	g-Proteobacteria	Brachybacterium alimentarium JB7	Actinobacteria	0	0	0	76.932
Alcaligenes sp. 2L29	g-Proteobacteria	Kluyvera intermedia TL336A	g-Proteobacteria	0	0	0	82.374
Alcaligenes sp. 2L29	g-Proteobacteria	Corynebacterium flavescens Mu128	Actinobacteria	0	0	0	75.088
Alcaligenes sp. 2L29	g-Proteobacteria	Glutamicibacter arilaitensis Ca106	Actinobacteria	0	0	0	77.704
Alcaligenes sp. 2L29	g-Proteobacteria	Propionibacterium acidipropinicii LSPAc1	Actinobacteria	0	0	0	72.686
Alcaligenes sp. 2L29	g-Proteobacteria	Serratia rubidaea TA 26	g-Proteobacteria	0	0	0	80.616
Alcaligenes sp. 2L29	g-Proteobacteria	Psychrobacter celer 91	g-Proteobacteria	0	0	0	85.041
Alcaligenes sp. 2L29	g-Proteobacteria	Luteococcus japonicus LSP Lj1	Actinobacteria	0	0	0	75.761
Alcaligenes sp. 2L29	g-Proteobacteria	Brevibacterium linens 862.7	Actinobacteria	0	0	0	75.293
Alcaligenes sp. 2L29	g-Proteobacteria	Klebsiella oxytoca Pi20	g-Proteobacteria	0	0	0	82.256
Alcaligenes sp. 2L29	g-Proteobacteria	Chryseobacterium bovis Pi18	g-Proteobacteria	0	0	0	73.826
Alcaligenes sp. 2L29	g-Proteobacteria	Staphylococcus lentus Ca2	Firmicutes	0	0	0	78.075
Alcaligenes sp. 2L29	g-Proteobacteria	Halomonas venusta 3D7M	g-Proteobacteria	0	0	0	81.316
Alcaligenes sp. 2L29	g-Proteobacteria	Lactobacillus casei ATCC 334 (Lactobacillus paracasei ATCC 334)	Firmicutes	0	0	0	76.056
Alcaligenes sp. 2L29	g-Proteobacteria	Corynebacterium casei UCMA 3821	Actinobacteria	0	0	0	75.059
Alcaligenes sp. 2L29	g-Proteobacteria	Propionibacterium freudenreichii subsp. shermanii CIRM-BIA1	Actinobacteria	0	0	0	75.264
Alcaligenes sp. 2L29	g-Proteobacteria	Listeria monocytogenes serotype 4bV str. LS542	Firmicutes	0	0	0	76.526
Alcaligenes sp. 2L29	g-Proteobacteria	Acinetobacter genospecies 3 PCAiE6.10	g-Proteobacteria	0	0	0	83.102
Alcaligenes sp. 2L29	g-Proteobacteria	Kocuria varians Mu208	Actinobacteria	0	0	0	76.464
Alcaligenes sp. 2L29	g-Proteobacteria	Brachybacterium alimentarium CNRZ925	Actinobacteria	0	0	0	76.698
Alcaligenes sp. 2L29	g-Proteobacteria	Weissella cibaria 3386	Firmicutes	0	0	0	75.117
Alcaligenes sp. 2L29	g-Proteobacteria	Sphingobacterium faecium PCAiF2.5	g-Proteobacteria	0	0	0	74.736
Alcaligenes sp. 2L29	g-Proteobacteria	Brachybacterium alimentarium 908.11	Actinobacteria	0	0	0	76.932
Alcaligenes sp. 2L29	g-Proteobacteria	Corynebacterium variabile	Actinobacteria	0	0	0	78.22
Alcaligenes sp. 2L29	g-Proteobacteria	Corynebacterium stationis CRBM6	Actinobacteria	0	0	0	67.056
Alcaligenes sp. 2L29	g-Proteobacteria	Brevibacterium linens 341.13	Actinobacteria	0	0	0	75.293
Alcaligenes sp. 2L29	g-Proteobacteria	Morganella psychrotolerans 925	g-Proteobacteria	0	0	0	82.429
Alcaligenes sp. 2L29	g-Proteobacteria	Raoultella planticola 3M45	g-Proteobacteria	0	0	0	83.534
Alcaligenes sp. 2L29	g-Proteobacteria	Lactococcus raffinolactis NCDO617	Firmicutes	0	0	0	73.77
Alcaligenes sp. 2L29	g-Proteobacteria	Streptococcus infantarius subsp. infantarius 3AG	Firmicutes	0	0	0	75.965
Alcaligenes sp. 2L29	g-Proteobacteria	Citrococcus sp. ws2216	Actinobacteria	0	0	0	76.815
Alcaligenes sp. 2L29	g-Proteobacteria	Brevibacterium iodinum ATCC 49514	Actinobacteria	0	0	0	76.23
Alcaligenes sp. 2L29	g-Proteobacteria	Leucobacter komagatae 1L36	Actinobacteria	0	0	0	77.051
Alcaligenes sp. 2L29	g-Proteobacteria	Halomonas venusta 3A7M	g-Proteobacteria	0	0	0	81.316
Alcaligenes sp. 2L29	g-Proteobacteria	Microbacterium sp. JB110	Actinobacteria	0	0	0	77.869
Alcaligenes sp. 2L29	g-Proteobacteria	Pseudoalteromonas sp JB197	g-Proteobacteria	0	0	0	82.941
Alcaligenes sp. 2L29	g-Proteobacteria	Enterococcus malodoratus FAM208 55	Firmicutes	0	0	0	76.202
Alcaligenes sp. 2L29	g-Proteobacteria	Enterococcus hirae SB10	Firmicutes	0	0	0	74.941
Alcaligenes sp. 2L29	g-Proteobacteria	Halomonas sp JB37	g-Proteobacteria	0	0	0	82.021
Alcaligenes sp. 2L29	g-Proteobacteria	Macrococcus caseolyticus ATCC 13458	Firmicutes	0	0	0	76.788
Alcaligenes sp. 2L29	g-Proteobacteria	Brevibacterium linens 947.7	Actinobacteria	0	0	0	75.293
Alcaligenes sp. 2L29	g-Proteobacteria	Jeotgalicoccus psychrophilus CRBMD21	Firmicutes	0	0	0	75.205
Alcaligenes sp. 2L29	g-Proteobacteria	Brevibacterium linens JB5	Actinobacteria	0	0	0	75.293
Alcaligenes sp. 2L29	g-Proteobacteria	Delftia acidovorans PCA12	g-Proteobacteria	0	0	0	86.618
Alcaligenes sp. 2L29	g-Proteobacteria	Pseudomonas pseudojaponica PCAi6.5	g-Proteobacteria	0	0	0	82.139
Alcaligenes sp. 2L29	g-Proteobacteria	Bacillus fordii CIP 108821	Firmicutes	0	0	0	77.719
Alcaligenes sp. 2L29	g-Proteobacteria	Leuconostoc citreum MSE2	Firmicutes	0	0	0	72.946
Alcaligenes sp. 2L29	g-Proteobacteria	Morganella morganii subsp. siboni 3A5A	g-Proteobacteria	0	0	0	84.337
Alcaligenes sp. 2L29	g-Proteobacteria	Brachybacterium alimentarium 962.10	Actinobacteria	0	0	0	76.932
Alcaligenes sp. 2L29	g-Proteobacteria	Lactococcus garvieae N201	Firmicutes	0	0	0	74.971
Alcaligenes sp. 2L29	g-Proteobacteria	Brevibacillus parabrevis CIP 110335	Firmicutes	0	0	0	76.581
Alcaligenes sp. 2L29	g-Proteobacteria	Brachybacterium alimentarium 876.9	Actinobacteria	0	0	0	76.932
Alcaligenes sp. 2L29	g-Proteobacteria	Staphylococcus xylosus	Firmicutes	0	0	0	76.202
Alcaligenes sp. 2L29	g-Proteobacteria	Chryseobacterium joostei PCAiD6.3	g-Proteobacteria	0	0	0	73.944
Alcaligenes sp. 2L29	g-Proteobacteria	Microbacterium oxydans PCA1	Actinobacteria	0	0	0	75.817
Alcaligenes sp. 2L29	g-Proteobacteria	Exiguobacterium acetylicum 180	Firmicutes	0	0	0	76.319
Alcaligenes sp. 2L29	g-Proteobacteria	Corynebacterium variabile DSM 44702	Actinobacteria	0	0	0	75.41
Alcaligenes sp. 2L29	g-Proteobacteria	Enterococcus durans LMG10746	Firmicutes	0	0	0	77.097
Alcaligenes sp. 2L29	g-Proteobacteria	Stenotrophomonas rhizophila PCA13	g-Proteobacteria	0	0	0	83.099
Alcaligenes sp. 2L29	g-Proteobacteria	Chryseobacterium ginsengisoli M17	g-Proteobacteria	0	0	0	72.711
Alcaligenes sp. 2L29	g-Proteobacteria	Bacillus galactosidilyticus CIP 108417	Firmicutes	0	0	0	75.967
Alcaligenes sp. 2L29	g-Proteobacteria	Chryseobacterium vrystaatense PCAIF2.7	g-Proteobacteria	0	0	0	72.851
Alcaligenes sp. 2L29	g-Proteobacteria	Raoultella ornithinolytica TL332	g-Proteobacteria	0	0	0	79.866
Alcaligenes sp. 2L29	g-Proteobacteria	Glutamicibacter arilaitensis GMPA29	Actinobacteria	0	0	0	76.458
Alcaligenes sp. 2L29	g-Proteobacteria	Microbacterium gubbeenense DSM 15944	Actinobacteria	0	0	0	76.347
Alcaligenes sp. 2L29	g-Proteobacteria	Corynebacterium casei JB4	Actinobacteria	0	0	0	75.059
Alcaligenes sp. 2L29	g-Proteobacteria	Staphylococcus fleuretti CIP106114	Firmicutes	0	0	0	76.492
Alcaligenes sp. 2L29	g-Proteobacteria	Vagococcus fluvialis bH819	Firmicutes	0	0	0	74.354
Alcaligenes sp. 2L29	g-Proteobacteria	Providencia heimbachae GR4	g-Proteobacteria	0	0	0	82.783
Alcaligenes sp. 2L29	g-Proteobacteria	Pantoea agglomerans PCAiQ6.3	g-Proteobacteria	0	0	0	82.491
Alcaligenes sp. 2L29	g-Proteobacteria	Agrococcus casei LMG22410	Actinobacteria	0	0	0	78.071
Alcaligenes sp. 2L29	g-Proteobacteria	Psychrobacter faecalis H5	g-Proteobacteria	0	0	0	84.077
Alcaligenes sp. 2L29	g-Proteobacteria	Kocuria carniphila CRBM38	Actinobacteria	0	0	0	75.117
Alcaligenes sp. 2L29	g-Proteobacteria	Lactobacillus casei BD-II	Firmicutes	0	0	0	76.056
Alcaligenes sp. 2L29	g-Proteobacteria	Comamonas testosteroni NL2512	g-Proteobacteria	0	0	0	86.706
Alcaligenes sp. 2L29	g-Proteobacteria	Pseudomonas psychrophila 1E44	g-Proteobacteria	0	0	0	83.4
Alcaligenes sp. 2L29	g-Proteobacteria	Staphylococcus caprae DSM 20608	Firmicutes	0	0	0	76.408
Alcaligenes sp. 2L29	g-Proteobacteria	Brachybacterium alimentarium 900.8	Actinobacteria	0	0	0	76.932
Alcaligenes sp. 2L29	g-Proteobacteria	Streptococcus salivarius CJ181	Firmicutes	0	0	0	75.044
Alcaligenes sp. 2L29	g-Proteobacteria	Psychrobacter immobilis PG1	g-Proteobacteria	0	0	0	85.395
Alcaligenes sp. 2L29	g-Proteobacteria	Brevibacterium linens 962.8	Actinobacteria	0	0	0	75.293
Alcaligenes sp. 2L29	g-Proteobacteria	Glutamicibacter sp. BW78	Actinobacteria	0	0	0	76.112
Alcaligenes sp. 2L29	g-Proteobacteria	Bacillus pumilus M21	Firmicutes	0	0	0	75.965
Alcaligenes sp. 2L29	g-Proteobacteria	Streptococcus infantarius 11FA	Firmicutes	0	0	0	75.856
Alcaligenes sp. 2L29	g-Proteobacteria	Stenotrophomonas indologenes PCAi2.2	g-Proteobacteria	0	0	0	81.954
Alcaligenes sp. 2L29	g-Proteobacteria	Staphylococcus equorum BC9	Firmicutes	0	0	0	76.174
Alcaligenes sp. 2L29	g-Proteobacteria	Brevibacterium linens 908.7	Actinobacteria	0	0	0	75.293
Alcaligenes sp. 2L29	g-Proteobacteria	Brochothrix thermosphacta cH814	Firmicutes	0	0	0	74.765
Alcaligenes sp. 2L29	g-Proteobacteria	Leucobacter sp. ER15 166 BHI15	Actinobacteria	0	0	0	76.14
Alcaligenes sp. 2L29	g-Proteobacteria	Facklamia tabacinasalis FAM208 56	Firmicutes	0	0	0	74.854
Alcaligenes sp. 2L29	g-Proteobacteria	Enterococcus saccharominimus M17 423	Firmicutes	0	0	0	74.562
Alcaligenes sp. 2L29	g-Proteobacteria	Brevibacterium antiquum CNRZ918	Actinobacteria	0	0	0	75.176
Alcaligenes sp. 2L29	g-Proteobacteria	Sphingobacterium sp JB170	g-Proteobacteria	0	0	0	73.09
Alcaligenes sp. 2L29	g-Proteobacteria	Chryseobacterium shigense PCAiB2.3	g-Proteobacteria	0	0	0	73.005
Alcaligenes sp. 2L29	g-Proteobacteria	Vagococcus lutrae FAM208	Firmicutes	0	0	0	77.056
Alcaligenes sp. 2L29	g-Proteobacteria	Staphylococcus vitulinus Ma1	Firmicutes	0	0	0	78.075
Alcaligenes sp. 2L29	g-Proteobacteria	Lactobacillus brevis KB290	Firmicutes	0	0	0	74.531
Alcaligenes sp. 2L29	g-Proteobacteria	Psychrobacter sp JB193	g-Proteobacteria	0	0	0	85.512
Alcaligenes sp. 2L29	g-Proteobacteria	Halomonas venusta 3F2F	g-Proteobacteria	0	0	0	81.316
Alcaligenes sp. 2L29	g-Proteobacteria	Paenibacillus sp. 3M17	Firmicutes	0	0	0	76.905
Alcaligenes sp. 2L29	g-Proteobacteria	Serratia proteamaculans 1C2F	g-Proteobacteria	0	0	0	84
Alcaligenes sp. 2L29	g-Proteobacteria	Glutamicibacter arilaitensis Re117	Actinobacteria	0	0	0	76.698
Alcaligenes sp. 2L29	g-Proteobacteria	Lactobacillus brevis ATCC 367	Firmicutes	0	0	0	74.531
Alcaligenes sp. 2L29	g-Proteobacteria	Citrobacter freundii Pi15	g-Proteobacteria	0	0	0	82.5
Alcaligenes sp. 2L29	g-Proteobacteria	Propionibacterium thoenii LSPTH1	Actinobacteria	0	0	0	74.941
Alcaligenes sp. 2L29	g-Proteobacteria	Glutamicibacter arilaitensis 3M03	Actinobacteria	0	0	0	77.704
Alcaligenes sp. 2L29	g-Proteobacteria	Brevibacterium linens ATCC 9172	Actinobacteria	0	0	0	75.659
Alcaligenes sp. 2L29	g-Proteobacteria	Weissella cibaria 3385	Firmicutes	0	0	0	95.765
Alcaligenes sp. 2L29	g-Proteobacteria	Rothia mucilaginosa M1710	Actinobacteria	0	0	0	75.644
Alcaligenes sp. 2L29	g-Proteobacteria	Brachybacterium alimentarium 341.9	Actinobacteria	0	0	0	76.932
Alcaligenes sp. 2L29	g-Proteobacteria	Brevibacterium casei S18	Actinobacteria	0	0	0	75.878
Alcaligenes sp. 2L29	g-Proteobacteria	Pseudomonas fragi 1E26	g-Proteobacteria	0	0	0	84.07
Alcaligenes sp. 2L29	g-Proteobacteria	Enterobacter amnigenus CV9	g-Proteobacteria	0	0	0	82.256
Alcaligenes sp. 2L29	g-Proteobacteria	Carnobacterium maltaromaticum 38b	Firmicutes	0	0	0	76.436
Alcaligenes sp. 2L29	g-Proteobacteria	Glutamicibacter arilaitensis JB182	Actinobacteria	0	0	0	76.698
Alcaligenes sp. 2L29	g-Proteobacteria	Psychrobacter namhaensis 1439	g-Proteobacteria	0	0	0	85.277
Alcaligenes sp. 2L29	g-Proteobacteria	Micrococcus luteus Mu201	Actinobacteria	0	0	0	77.4
Alcaligenes sp. 2L29	g-Proteobacteria	Pediococcus parvulus CIRM750	Actinobacteria	0	0	0	77.4
Alcaligenes sp. 2L29	g-Proteobacteria	Exiguobacterium sibiricum NL255	Firmicutes	0	0	0	75.263
Alcaligenes sp. 2L29	g-Proteobacteria	Acinetobacter johnsonii 3M05	g-Proteobacteria	0	0	0	82.126
Alcaligenes sp. 2L29	g-Proteobacteria	Lactobacillus crustorum FH4	Firmicutes	0	0	0	74.18
Alcaligenes sp. 2L29	g-Proteobacteria	Serratia marescens 448	g-Proteobacteria	0	0	0	84.677
Alcaligenes sp. 2L29	g-Proteobacteria	Staphylococcus equorum BC15	Firmicutes	0	0	0	76.291
Alcaligenes sp. 2L29	g-Proteobacteria	Stenotrophomonas maltophilia Pi1	g-Proteobacteria	0	0	0	82.474
Alcaligenes sp. 2L29	g-Proteobacteria	Listeria monocytogenes str. Scott A	Firmicutes	0	0	0	76.436
Alcaligenes sp. 2L29	g-Proteobacteria	Brachybacterium alimentarium 862.8	Actinobacteria	0	0	0	76.932
Alcaligenes sp. 2L29	g-Proteobacteria	Brevibacterium casei CIP 102111	Actinobacteria	0	0	0	74.694
Alcaligenes sp. 2L29	g-Proteobacteria	Brevibacterium linens 738.8	Actinobacteria	0	0	0	75.293
Alcaligenes sp. 2L29	g-Proteobacteria	Mycobacterium vaccae CIP 105934	Actinobacteria	0	0	0	75.41
Alcaligenes sp. 2L29	g-Proteobacteria	Proteus vulgaris 1M25	g-Proteobacteria	0	0	0	81.862
Alcaligenes sp. 2L29	g-Proteobacteria	Leuconostoc mesenteroides CNRZ1283	Firmicutes	0	0	0	76.056
Alcaligenes sp. 2L29	g-Proteobacteria	Brachybacterium alimentarium 947.11	Actinobacteria	0	0	0	76.932
Alcaligenes sp. 2L29	g-Proteobacteria	Streptococcus macedonicus 679	Firmicutes	0	0	0	74.679
Alcaligenes sp. 2L29	g-Proteobacteria	Staphylococcus warneri 1445	Firmicutes	0	0	0	76.144
Alcaligenes sp. 2L29	g-Proteobacteria	Providencia rettgeri 947	g-Proteobacteria	0	0	0	82.901
Alcaligenes sp. 2L29	g-Proteobacteria	Proteus hauseri 1M10	g-Proteobacteria	0	0	0	82.783
Alcaligenes sp. 2L29	g-Proteobacteria	Vibrio litoralis B4	g-Proteobacteria	0	0	0	82.374
Alcaligenes sp. 2L29	g-Proteobacteria	Providencia alcalifaciens GM3	g-Proteobacteria	0	0	0	83.604
Paenibacillus lactis CIP 108827	Firmicutes	Corynebacterium ammoniagenes ws2211	Actinobacteria	0	0	0	81.974
Paenibacillus lactis CIP 108827	Firmicutes	Brachybacterium alimentarium 738.10	Actinobacteria	0	0	0	78.535
Paenibacillus lactis CIP 108827	Firmicutes	Halomonas sp. 1M45	g-Proteobacteria	0	0	0	78.476
Paenibacillus lactis CIP 108827	Firmicutes	Brevibacterium linens BL2	Actinobacteria	0	0	0	79.949
Paenibacillus lactis CIP 108827	Firmicutes	Pseudomonas lundensis PCAiD2.2	g-Proteobacteria	0	0	0	85.304
Paenibacillus lactis CIP 108827	Firmicutes	Brevibacterium linens 876.7	Actinobacteria	0	0	0	80.206
Paenibacillus lactis CIP 108827	Firmicutes	Brevibacterium linens 900.6	Actinobacteria	0	0	0	79.949
Paenibacillus lactis CIP 108827	Firmicutes	Psychrobacter aquimaris ER15 174 BHI7	g-Proteobacteria	0	0	0	75.737
Paenibacillus lactis CIP 108827	Firmicutes	Glutamicibacter sp. BW80	Actinobacteria	0	0	0	79.82
Paenibacillus lactis CIP 108827	Firmicutes	Leuconostoc pseudomesenteroides MSE7	Firmicutes	0	0	0	84.064
Paenibacillus lactis CIP 108827	Firmicutes	Pseudomonas fluorescens PCAiD6.2	g-Proteobacteria	0	0	0	78.406
Paenibacillus lactis CIP 108827	Firmicutes	Bavariicoccus seileri ws4188	Firmicutes	0	0	0	88.932
Paenibacillus lactis CIP 108827	Firmicutes	Ornithinibacillus bavariensis CIP 109287	Firmicutes	0	0	0	91.366
Paenibacillus lactis CIP 108827	Firmicutes	Bacillus altitudinis 263	Firmicutes	0	0	0	91.316
Paenibacillus lactis CIP 108827	Firmicutes	Brachybacterium alimentarium JB7	Actinobacteria	0	0	0	78.535
Paenibacillus lactis CIP 108827	Firmicutes	Kluyvera intermedia TL336A	g-Proteobacteria	0	0	0	77.735
Paenibacillus lactis CIP 108827	Firmicutes	Corynebacterium flavescens Mu128	Actinobacteria	0	0	0	79.974
Paenibacillus lactis CIP 108827	Firmicutes	Glutamicibacter arilaitensis Ca106	Actinobacteria	0	0	0	79.82
Paenibacillus lactis CIP 108827	Firmicutes	Propionibacterium acidipropinicii LSPAc1	Actinobacteria	0	0	0	75.636
Paenibacillus lactis CIP 108827	Firmicutes	Serratia rubidaea TA 26	g-Proteobacteria	0	0	0	74.932
Paenibacillus lactis CIP 108827	Firmicutes	Psychrobacter celer 91	g-Proteobacteria	0	0	0	77.212
Paenibacillus lactis CIP 108827	Firmicutes	Luteococcus japonicus LSP Lj1	Actinobacteria	0	0	0	75.45
Paenibacillus lactis CIP 108827	Firmicutes	Brevibacterium linens 862.7	Actinobacteria	0	0	0	79.949
Paenibacillus lactis CIP 108827	Firmicutes	Klebsiella oxytoca Pi20	g-Proteobacteria	0	0	0	77.735
Paenibacillus lactis CIP 108827	Firmicutes	Chryseobacterium bovis Pi18	g-Proteobacteria	0	0	0	72.962
Paenibacillus lactis CIP 108827	Firmicutes	Staphylococcus lentus Ca2	Firmicutes	0	0	0	88.288
Paenibacillus lactis CIP 108827	Firmicutes	Halomonas venusta 3D7M	g-Proteobacteria	0	0	0	79.144
Paenibacillus lactis CIP 108827	Firmicutes	Lactobacillus casei ATCC 334 (Lactobacillus paracasei ATCC 334)	Firmicutes	0	0	0	87.13
Paenibacillus lactis CIP 108827	Firmicutes	Corynebacterium casei UCMA 3821	Actinobacteria	0	0	0	79.434
Paenibacillus lactis CIP 108827	Firmicutes	Propionibacterium freudenreichii subsp. shermanii CIRM-BIA1	Actinobacteria	0	0	0	76.319
Paenibacillus lactis CIP 108827	Firmicutes	Listeria monocytogenes serotype 4bV str. LS542	Firmicutes	0	0	0	88.417
Paenibacillus lactis CIP 108827	Firmicutes	Acinetobacter genospecies 3 PCAiE6.10	g-Proteobacteria	0	0	0	81.178
Paenibacillus lactis CIP 108827	Firmicutes	Kocuria varians Mu208	Actinobacteria	0	0	0	80.206
Paenibacillus lactis CIP 108827	Firmicutes	Brachybacterium alimentarium CNRZ925	Actinobacteria	0	0	0	78.406
Paenibacillus lactis CIP 108827	Firmicutes	Weissella cibaria 3386	Firmicutes	0	0	0	78.979
Paenibacillus lactis CIP 108827	Firmicutes	Sphingobacterium faecium PCAiF2.5	g-Proteobacteria	0	0	0	72.237
Paenibacillus lactis CIP 108827	Firmicutes	Brachybacterium alimentarium 908.11	Actinobacteria	0	0	0	78.535
Paenibacillus lactis CIP 108827	Firmicutes	Corynebacterium variabile	Actinobacteria	0	0	0	79.177
Paenibacillus lactis CIP 108827	Firmicutes	Corynebacterium stationis CRBM6	Actinobacteria	0	0	0	72.622
Paenibacillus lactis CIP 108827	Firmicutes	Brevibacterium linens 341.13	Actinobacteria	0	0	0	80.077
Paenibacillus lactis CIP 108827	Firmicutes	Morganella psychrotolerans 925	g-Proteobacteria	0	0	0	79.06
Paenibacillus lactis CIP 108827	Firmicutes	Raoultella planticola 3M45	g-Proteobacteria	0	0	0	78.476
Paenibacillus lactis CIP 108827	Firmicutes	Lactococcus raffinolactis NCDO617	Firmicutes	0	0	0	85.047
Paenibacillus lactis CIP 108827	Firmicutes	Streptococcus infantarius subsp. infantarius 3AG	Firmicutes	0	0	0	86.643
Paenibacillus lactis CIP 108827	Firmicutes	Citrococcus sp. ws2216	Actinobacteria	0	0	0	80.206
Paenibacillus lactis CIP 108827	Firmicutes	Brevibacterium iodinum ATCC 49514	Actinobacteria	0	0	0	79.306
Paenibacillus lactis CIP 108827	Firmicutes	Leucobacter komagatae 1L36	Actinobacteria	0	0	0	80.334
Paenibacillus lactis CIP 108827	Firmicutes	Halomonas venusta 3A7M	g-Proteobacteria	0	0	0	79.144
Paenibacillus lactis CIP 108827	Firmicutes	Microbacterium sp. JB110	Actinobacteria	0	0	0	80.848
Paenibacillus lactis CIP 108827	Firmicutes	Pseudoalteromonas sp JB197	g-Proteobacteria	0	0	0	77.941
Paenibacillus lactis CIP 108827	Firmicutes	Enterococcus malodoratus FAM208 55	Firmicutes	0	0	0	87.532
Paenibacillus lactis CIP 108827	Firmicutes	Enterococcus hirae SB10	Firmicutes	0	0	0	86.937
Paenibacillus lactis CIP 108827	Firmicutes	Halomonas sp JB37	g-Proteobacteria	0	0	0	78.743
Paenibacillus lactis CIP 108827	Firmicutes	Macrococcus caseolyticus ATCC 13458	Firmicutes	0	0	0	88.745
Paenibacillus lactis CIP 108827	Firmicutes	Brevibacterium linens 947.7	Actinobacteria	0	0	0	79.949
Paenibacillus lactis CIP 108827	Firmicutes	Jeotgalicoccus psychrophilus CRBMD21	Firmicutes	0	0	0	86.772
Paenibacillus lactis CIP 108827	Firmicutes	Brevibacterium linens JB5	Actinobacteria	0	0	0	79.949
Paenibacillus lactis CIP 108827	Firmicutes	Delftia acidovorans PCA12	g-Proteobacteria	0	0	0	77.172
Paenibacillus lactis CIP 108827	Firmicutes	Pseudomonas pseudojaponica PCAi6.5	g-Proteobacteria	0	0	0	79.011
Paenibacillus lactis CIP 108827	Firmicutes	Bacillus fordii CIP 108821	Firmicutes	0	0	0	88.552
Paenibacillus lactis CIP 108827	Firmicutes	Leuconostoc citreum MSE2	Firmicutes	0	0	0	83.079
Paenibacillus lactis CIP 108827	Firmicutes	Morganella morganii subsp. siboni 3A5A	g-Proteobacteria	0	0	0	78.933
Paenibacillus lactis CIP 108827	Firmicutes	Brachybacterium alimentarium 962.10	Actinobacteria	0	0	0	78.535
Paenibacillus lactis CIP 108827	Firmicutes	Lactococcus garvieae N201	Firmicutes	0	0	0	84.012
Paenibacillus lactis CIP 108827	Firmicutes	Brevibacillus parabrevis CIP 110335	Firmicutes	0	0	0	89.06
Paenibacillus lactis CIP 108827	Firmicutes	Brachybacterium alimentarium 876.9	Actinobacteria	0	0	0	78.535
Paenibacillus lactis CIP 108827	Firmicutes	Staphylococcus xylosus	Firmicutes	0	0	0	88.046
Paenibacillus lactis CIP 108827	Firmicutes	Chryseobacterium joostei PCAiD6.3	g-Proteobacteria	0	0	0	73.031
Paenibacillus lactis CIP 108827	Firmicutes	Microbacterium oxydans PCA1	Actinobacteria	0	0	0	79.423
Paenibacillus lactis CIP 108827	Firmicutes	Exiguobacterium acetylicum 180	Firmicutes	0	0	0	89.189
Paenibacillus lactis CIP 108827	Firmicutes	Corynebacterium variabile DSM 44702	Actinobacteria	0	0	0	78.92
Paenibacillus lactis CIP 108827	Firmicutes	Enterococcus durans LMG10746	Firmicutes	0	0	0	87.051
Paenibacillus lactis CIP 108827	Firmicutes	Stenotrophomonas rhizophila PCA13	g-Proteobacteria	0	0	0	79.278
Paenibacillus lactis CIP 108827	Firmicutes	Chryseobacterium ginsengisoli M17	g-Proteobacteria	0	0	0	72.029
Paenibacillus lactis CIP 108827	Firmicutes	Bacillus galactosidilyticus CIP 108417	Firmicutes	0	0	0	90.285
Paenibacillus lactis CIP 108827	Firmicutes	Chryseobacterium vrystaatense PCAIF2.7	g-Proteobacteria	0	0	0	87.931
Paenibacillus lactis CIP 108827	Firmicutes	Raoultella ornithinolytica TL332	g-Proteobacteria	0	0	0	76.905
Paenibacillus lactis CIP 108827	Firmicutes	Glutamicibacter arilaitensis GMPA29	Actinobacteria	0	0	0	78.782
Paenibacillus lactis CIP 108827	Firmicutes	Microbacterium gubbeenense DSM 15944	Actinobacteria	0	0	0	80.334
Paenibacillus lactis CIP 108827	Firmicutes	Corynebacterium casei JB4	Actinobacteria	0	0	0	79.434
Paenibacillus lactis CIP 108827	Firmicutes	Staphylococcus fleuretti CIP106114	Firmicutes	0	0	0	88.562
Paenibacillus lactis CIP 108827	Firmicutes	Vagococcus fluvialis bH819	Firmicutes	0	0	0	86.999
Paenibacillus lactis CIP 108827	Firmicutes	Providencia heimbachae GR4	g-Proteobacteria	0	0	0	77.852
Paenibacillus lactis CIP 108827	Firmicutes	Pantoea agglomerans PCAiQ6.3	g-Proteobacteria	0	0	0	77.477
Paenibacillus lactis CIP 108827	Firmicutes	Agrococcus casei LMG22410	Actinobacteria	0	0	0	79.82
Paenibacillus lactis CIP 108827	Firmicutes	Psychrobacter faecalis H5	g-Proteobacteria	0	0	0	76.944
Paenibacillus lactis CIP 108827	Firmicutes	Kocuria carniphila CRBM38	Actinobacteria	0	0	0	78.979
Paenibacillus lactis CIP 108827	Firmicutes	Lactobacillus casei BD-II	Firmicutes	0	0	0	87.13
Paenibacillus lactis CIP 108827	Firmicutes	Comamonas testosteroni NL2512	g-Proteobacteria	0	0	0	77.22
Paenibacillus lactis CIP 108827	Firmicutes	Pseudomonas psychrophila 1E44	g-Proteobacteria	0	0	0	79.412
Paenibacillus lactis CIP 108827	Firmicutes	Alcaligenes faecalis 2L10	g-Proteobacteria	0	0	0	78.61
Paenibacillus lactis CIP 108827	Firmicutes	Staphylococcus caprae DSM 20608	Firmicutes	0	0	0	88.503
Paenibacillus lactis CIP 108827	Firmicutes	Brachybacterium alimentarium 900.8	Actinobacteria	0	0	0	78.535
Paenibacillus lactis CIP 108827	Firmicutes	Streptococcus salivarius CJ181	Firmicutes	0	0	0	85.739
Paenibacillus lactis CIP 108827	Firmicutes	Psychrobacter immobilis PG1	g-Proteobacteria	0	0	0	77.748
Paenibacillus lactis CIP 108827	Firmicutes	Brevibacterium linens 962.8	Actinobacteria	0	0	0	80.077
Paenibacillus lactis CIP 108827	Firmicutes	Glutamicibacter sp. BW78	Actinobacteria	0	0	0	79.177
Paenibacillus lactis CIP 108827	Firmicutes	Bacillus pumilus M21	Firmicutes	0	0	0	89.845
Paenibacillus lactis CIP 108827	Firmicutes	Streptococcus infantarius 11FA	Firmicutes	0	0	0	86.964
Paenibacillus lactis CIP 108827	Firmicutes	Stenotrophomonas indologenes PCAi2.2	g-Proteobacteria	0	0	0	78.209
Paenibacillus lactis CIP 108827	Firmicutes	Staphylococcus equorum BC9	Firmicutes	0	0	0	87.773
Paenibacillus lactis CIP 108827	Firmicutes	Brevibacterium linens 908.7	Actinobacteria	0	0	0	79.949
Paenibacillus lactis CIP 108827	Firmicutes	Brochothrix thermosphacta cH814	Firmicutes	0	0	0	87.032
Paenibacillus lactis CIP 108827	Firmicutes	Leucobacter sp. ER15 166 BHI15	Actinobacteria	0	0	0	79.076
Paenibacillus lactis CIP 108827	Firmicutes	Facklamia tabacinasalis FAM208 56	Firmicutes	0	0	0	88.102
Paenibacillus lactis CIP 108827	Firmicutes	Enterococcus saccharominimus M17 423	Firmicutes	0	0	0	86.047
Paenibacillus lactis CIP 108827	Firmicutes	Brevibacterium antiquum CNRZ918	Actinobacteria	0	0	0	79.82
Paenibacillus lactis CIP 108827	Firmicutes	Sphingobacterium sp JB170	g-Proteobacteria	0	0	0	72.494
Paenibacillus lactis CIP 108827	Firmicutes	Chryseobacterium shigense PCAiB2.3	g-Proteobacteria	0	0	0	72.23
Paenibacillus lactis CIP 108827	Firmicutes	Vagococcus lutrae FAM208	Firmicutes	0	0	0	89.136
Paenibacillus lactis CIP 108827	Firmicutes	Staphylococcus vitulinus Ma1	Firmicutes	0	0	0	88.472
Paenibacillus lactis CIP 108827	Firmicutes	Lactobacillus brevis KB290	Firmicutes	0	0	0	85.714
Paenibacillus lactis CIP 108827	Firmicutes	Psychrobacter sp JB193	g-Proteobacteria	0	0	0	76.944
Paenibacillus lactis CIP 108827	Firmicutes	Halomonas venusta 3F2F	g-Proteobacteria	0	0	0	79.144
Paenibacillus lactis CIP 108827	Firmicutes	Serratia proteamaculans 1C2F	g-Proteobacteria	0	0	0	77.515
Paenibacillus lactis CIP 108827	Firmicutes	Glutamicibacter arilaitensis Re117	Actinobacteria	0	0	0	79.82
Paenibacillus lactis CIP 108827	Firmicutes	Lactobacillus brevis ATCC 367	Firmicutes	0	0	0	85.714
Paenibacillus lactis CIP 108827	Firmicutes	Citrobacter freundii Pi15	g-Proteobacteria	0	0	0	78.184
Paenibacillus lactis CIP 108827	Firmicutes	Propionibacterium thoenii LSPTH1	Actinobacteria	0	0	0	78.278
Paenibacillus lactis CIP 108827	Firmicutes	Glutamicibacter arilaitensis 3M03	Actinobacteria	0	0	0	79.82
Paenibacillus lactis CIP 108827	Firmicutes	Brevibacterium linens ATCC 9172	Actinobacteria	0	0	0	79.563
Paenibacillus lactis CIP 108827	Firmicutes	Weissella cibaria 3385	Firmicutes	0	0	0	79.545
Paenibacillus lactis CIP 108827	Firmicutes	Rothia mucilaginosa M1710	Actinobacteria	0	0	0	78.535
Paenibacillus lactis CIP 108827	Firmicutes	Brachybacterium alimentarium 341.9	Actinobacteria	0	0	0	78.535
Paenibacillus lactis CIP 108827	Firmicutes	Brevibacterium casei S18	Actinobacteria	0	0	0	79.82
Paenibacillus lactis CIP 108827	Firmicutes	Pseudomonas fragi 1E26	g-Proteobacteria	0	0	0	79.947
Paenibacillus lactis CIP 108827	Firmicutes	Enterobacter amnigenus CV9	g-Proteobacteria	0	0	0	77.735
Paenibacillus lactis CIP 108827	Firmicutes	Carnobacterium maltaromaticum 38b	Firmicutes	0	0	0	89.075
Paenibacillus lactis CIP 108827	Firmicutes	Glutamicibacter arilaitensis JB182	Actinobacteria	0	0	0	79.82
Paenibacillus lactis CIP 108827	Firmicutes	Psychrobacter namhaensis 1439	g-Proteobacteria	0	0	0	77.212
Paenibacillus lactis CIP 108827	Firmicutes	Micrococcus luteus Mu201	Actinobacteria	0	0	0	79.82
Paenibacillus lactis CIP 108827	Firmicutes	Pediococcus parvulus CIRM750	Actinobacteria	0	0	0	79.82
Paenibacillus lactis CIP 108827	Firmicutes	Exiguobacterium sibiricum NL255	Firmicutes	0	0	0	87.581
Paenibacillus lactis CIP 108827	Firmicutes	Acinetobacter johnsonii 3M05	g-Proteobacteria	0	0	0	78.638
Paenibacillus lactis CIP 108827	Firmicutes	Lactobacillus crustorum FH4	Firmicutes	0	0	0	84.106
Paenibacillus lactis CIP 108827	Firmicutes	Serratia marescens 448	g-Proteobacteria	0	0	0	78.792
Paenibacillus lactis CIP 108827	Firmicutes	Staphylococcus equorum BC15	Firmicutes	0	0	0	88.031
Paenibacillus lactis CIP 108827	Firmicutes	Stenotrophomonas maltophilia Pi1	g-Proteobacteria	0	0	0	78.676
Paenibacillus lactis CIP 108827	Firmicutes	Listeria monocytogenes str. Scott A	Firmicutes	0	0	0	88.303
Paenibacillus lactis CIP 108827	Firmicutes	Brachybacterium alimentarium 862.8	Actinobacteria	0	0	0	78.535
Paenibacillus lactis CIP 108827	Firmicutes	Brevibacterium casei CIP 102111	Actinobacteria	0	0	0	79.82
Paenibacillus lactis CIP 108827	Firmicutes	Brevibacterium linens 738.8	Actinobacteria	0	0	0	79.949
Paenibacillus lactis CIP 108827	Firmicutes	Mycobacterium vaccae CIP 105934	Actinobacteria	0	0	0	79.177
Paenibacillus lactis CIP 108827	Firmicutes	Proteus vulgaris 1M25	g-Proteobacteria	0	0	0	78.658
Paenibacillus lactis CIP 108827	Firmicutes	Leuconostoc mesenteroides CNRZ1283	Firmicutes	0	0	0	84.427
Paenibacillus lactis CIP 108827	Firmicutes	Brachybacterium alimentarium 947.11	Actinobacteria	0	0	0	78.535
Paenibacillus lactis CIP 108827	Firmicutes	Streptococcus macedonicus 679	Firmicutes	0	0	0	85.16
Paenibacillus lactis CIP 108827	Firmicutes	Staphylococcus warneri 1445	Firmicutes	0	0	0	87.664
Paenibacillus lactis CIP 108827	Firmicutes	Providencia rettgeri 947	g-Proteobacteria	0	0	0	77.718
Paenibacillus lactis CIP 108827	Firmicutes	Proteus hauseri 1M10	g-Proteobacteria	0	0	0	78.792
Paenibacillus lactis CIP 108827	Firmicutes	Vibrio litoralis B4	g-Proteobacteria	0	0	0	79.412
Paenibacillus lactis CIP 108827	Firmicutes	Providencia alcalifaciens GM3	g-Proteobacteria	0	0	0	76.549
Corynebacterium ammoniagenes ws2211	Actinobacteria	Brachybacterium alimentarium 738.10	Actinobacteria	0	0	0	87.664
Corynebacterium ammoniagenes ws2211	Actinobacteria	Halomonas sp. 1M45	g-Proteobacteria	0	0	0	77.48
Corynebacterium ammoniagenes ws2211	Actinobacteria	Brevibacterium linens BL2	Actinobacteria	0	0	0	85.04
Corynebacterium ammoniagenes ws2211	Actinobacteria	Pseudomonas lundensis PCAiD2.2	g-Proteobacteria	0	0	0	78.137
Corynebacterium ammoniagenes ws2211	Actinobacteria	Brevibacterium linens 876.7	Actinobacteria	0	0	0	85.04
Corynebacterium ammoniagenes ws2211	Actinobacteria	Brevibacterium linens 900.6	Actinobacteria	0	0	0	85.04
Corynebacterium ammoniagenes ws2211	Actinobacteria	Psychrobacter aquimaris ER15 174 BHI7	g-Proteobacteria	0	0	0	76.027
Corynebacterium ammoniagenes ws2211	Actinobacteria	Glutamicibacter sp. BW80	Actinobacteria	0	0	0	86.948
Corynebacterium ammoniagenes ws2211	Actinobacteria	Leuconostoc pseudomesenteroides MSE7	Firmicutes	0	0	0	73.603
Corynebacterium ammoniagenes ws2211	Actinobacteria	Pseudomonas fluorescens PCAiD6.2	g-Proteobacteria	0	0	0	76.786
Corynebacterium ammoniagenes ws2211	Actinobacteria	Bavariicoccus seileri ws4188	Firmicutes	0	0	0	80.274
Corynebacterium ammoniagenes ws2211	Actinobacteria	Ornithinibacillus bavariensis CIP 109287	Firmicutes	0	0	0	81.702
Corynebacterium ammoniagenes ws2211	Actinobacteria	Bacillus altitudinis 263	Firmicutes	0	0	0	81.903
Corynebacterium ammoniagenes ws2211	Actinobacteria	Brachybacterium alimentarium JB7	Actinobacteria	0	0	0	87.664
Corynebacterium ammoniagenes ws2211	Actinobacteria	Kluyvera intermedia TL336A	g-Proteobacteria	0	0	0	77.455
Corynebacterium ammoniagenes ws2211	Actinobacteria	Glutamicibacter arilaitensis Ca106	Actinobacteria	0	0	0	89.722
Corynebacterium ammoniagenes ws2211	Actinobacteria	Propionibacterium acidipropinicii LSPAc1	Actinobacteria	0	0	0	78.882
Corynebacterium ammoniagenes ws2211	Actinobacteria	Serratia rubidaea TA 26	g-Proteobacteria	0	0	0	73.42
Corynebacterium ammoniagenes ws2211	Actinobacteria	Psychrobacter celer 91	g-Proteobacteria	0	0	0	78.864
Corynebacterium ammoniagenes ws2211	Actinobacteria	Luteococcus japonicus LSP Lj1	Actinobacteria	0	0	0	84.549
Corynebacterium ammoniagenes ws2211	Actinobacteria	Brevibacterium linens 862.7	Actinobacteria	0	0	0	85.04
Corynebacterium ammoniagenes ws2211	Actinobacteria	Klebsiella oxytoca Pi20	g-Proteobacteria	0	0	0	77.093
Corynebacterium ammoniagenes ws2211	Actinobacteria	Chryseobacterium bovis Pi18	g-Proteobacteria	0	0	0	73.258
Corynebacterium ammoniagenes ws2211	Actinobacteria	Staphylococcus lentus Ca2	Firmicutes	0	0	0	81.116
Corynebacterium ammoniagenes ws2211	Actinobacteria	Halomonas venusta 3D7M	g-Proteobacteria	0	0	0	77.159
Corynebacterium ammoniagenes ws2211	Actinobacteria	Lactobacillus casei ATCC 334 (Lactobacillus paracasei ATCC 334)	Firmicutes	0	0	0	79.095
Corynebacterium ammoniagenes ws2211	Actinobacteria	Propionibacterium freudenreichii subsp. shermanii CIRM-BIA1	Actinobacteria	0	0	0	85.111
Corynebacterium ammoniagenes ws2211	Actinobacteria	Listeria monocytogenes serotype 4bV str. LS542	Firmicutes	0	0	0	78.046
Corynebacterium ammoniagenes ws2211	Actinobacteria	Acinetobacter genospecies 3 PCAiE6.10	g-Proteobacteria	0	0	0	78.052
Corynebacterium ammoniagenes ws2211	Actinobacteria	Kocuria varians Mu208	Actinobacteria	0	0	0	87.633
Corynebacterium ammoniagenes ws2211	Actinobacteria	Brachybacterium alimentarium CNRZ925	Actinobacteria	0	0	0	87.664
Corynebacterium ammoniagenes ws2211	Actinobacteria	Weissella cibaria 3386	Firmicutes	0	0	0	86.398
Corynebacterium ammoniagenes ws2211	Actinobacteria	Sphingobacterium faecium PCAiF2.5	g-Proteobacteria	0	0	0	72.02
Corynebacterium ammoniagenes ws2211	Actinobacteria	Brachybacterium alimentarium 908.11	Actinobacteria	0	0	0	87.664
Corynebacterium ammoniagenes ws2211	Actinobacteria	Corynebacterium variabile	Actinobacteria	0	0	0	86.882
Corynebacterium ammoniagenes ws2211	Actinobacteria	Brevibacterium linens 341.13	Actinobacteria	0	0	0	85.04
Corynebacterium ammoniagenes ws2211	Actinobacteria	Morganella psychrotolerans 925	g-Proteobacteria	0	0	0	75.958
Corynebacterium ammoniagenes ws2211	Actinobacteria	Raoultella planticola 3M45	g-Proteobacteria	0	0	0	78.252
Corynebacterium ammoniagenes ws2211	Actinobacteria	Lactococcus raffinolactis NCDO617	Firmicutes	0	0	0	79.37
Corynebacterium ammoniagenes ws2211	Actinobacteria	Streptococcus infantarius subsp. infantarius 3AG	Firmicutes	0	0	0	77.003
Corynebacterium ammoniagenes ws2211	Actinobacteria	Citrococcus sp. ws2216	Actinobacteria	0	0	0	87.743
Corynebacterium ammoniagenes ws2211	Actinobacteria	Brevibacterium iodinum ATCC 49514	Actinobacteria	0	0	0	87.354
Corynebacterium ammoniagenes ws2211	Actinobacteria	Leucobacter komagatae 1L36	Actinobacteria	0	0	0	88.108
Corynebacterium ammoniagenes ws2211	Actinobacteria	Halomonas venusta 3A7M	g-Proteobacteria	0	0	0	77.159
Corynebacterium ammoniagenes ws2211	Actinobacteria	Microbacterium sp. JB110	Actinobacteria	0	0	0	85.383
Corynebacterium ammoniagenes ws2211	Actinobacteria	Pseudoalteromonas sp JB197	g-Proteobacteria	0	0	0	75.605
Corynebacterium ammoniagenes ws2211	Actinobacteria	Enterococcus malodoratus FAM208 55	Firmicutes	0	0	0	81.132
Corynebacterium ammoniagenes ws2211	Actinobacteria	Enterococcus hirae SB10	Firmicutes	0	0	0	78.51
Corynebacterium ammoniagenes ws2211	Actinobacteria	Halomonas sp JB37	g-Proteobacteria	0	0	0	75.277
Corynebacterium ammoniagenes ws2211	Actinobacteria	Macrococcus caseolyticus ATCC 13458	Firmicutes	0	0	0	79.119
Corynebacterium ammoniagenes ws2211	Actinobacteria	Brevibacterium linens 947.7	Actinobacteria	0	0	0	85.04
Corynebacterium ammoniagenes ws2211	Actinobacteria	Jeotgalicoccus psychrophilus CRBMD21	Firmicutes	0	0	0	76.758
Corynebacterium ammoniagenes ws2211	Actinobacteria	Brevibacterium linens JB5	Actinobacteria	0	0	0	85.04
Corynebacterium ammoniagenes ws2211	Actinobacteria	Delftia acidovorans PCA12	g-Proteobacteria	0	0	0	72.791
Corynebacterium ammoniagenes ws2211	Actinobacteria	Pseudomonas pseudojaponica PCAi6.5	g-Proteobacteria	0	0	0	75.256
Corynebacterium ammoniagenes ws2211	Actinobacteria	Bacillus fordii CIP 108821	Firmicutes	0	0	0	78.819
Corynebacterium ammoniagenes ws2211	Actinobacteria	Leuconostoc citreum MSE2	Firmicutes	0	0	0	70.582
Corynebacterium ammoniagenes ws2211	Actinobacteria	Morganella morganii subsp. siboni 3A5A	g-Proteobacteria	0	0	0	78.755
Corynebacterium ammoniagenes ws2211	Actinobacteria	Brachybacterium alimentarium 962.10	Actinobacteria	0	0	0	87.664
Corynebacterium ammoniagenes ws2211	Actinobacteria	Lactococcus garvieae N201	Firmicutes	0	0	0	75.968
Corynebacterium ammoniagenes ws2211	Actinobacteria	Brevibacillus parabrevis CIP 110335	Firmicutes	0	0	0	79.741
Corynebacterium ammoniagenes ws2211	Actinobacteria	Brachybacterium alimentarium 876.9	Actinobacteria	0	0	0	87.664
Corynebacterium ammoniagenes ws2211	Actinobacteria	Staphylococcus xylosus	Firmicutes	0	0	0	78.027
Corynebacterium ammoniagenes ws2211	Actinobacteria	Chryseobacterium joostei PCAiD6.3	g-Proteobacteria	0	0	0	72.801
Corynebacterium ammoniagenes ws2211	Actinobacteria	Microbacterium oxydans PCA1	Actinobacteria	0	0	0	82.636
Corynebacterium ammoniagenes ws2211	Actinobacteria	Exiguobacterium acetylicum 180	Firmicutes	0	0	0	79.01
Corynebacterium ammoniagenes ws2211	Actinobacteria	Corynebacterium variabile DSM 44702	Actinobacteria	0	0	0	94.332
Corynebacterium ammoniagenes ws2211	Actinobacteria	Enterococcus durans LMG10746	Firmicutes	0	0	0	81.838
Corynebacterium ammoniagenes ws2211	Actinobacteria	Stenotrophomonas rhizophila PCA13	g-Proteobacteria	0	0	0	79.659
Corynebacterium ammoniagenes ws2211	Actinobacteria	Chryseobacterium ginsengisoli M17	g-Proteobacteria	0	0	0	70.549
Corynebacterium ammoniagenes ws2211	Actinobacteria	Bacillus galactosidilyticus CIP 108417	Firmicutes	0	0	0	79.727
Corynebacterium ammoniagenes ws2211	Actinobacteria	Chryseobacterium vrystaatense PCAIF2.7	g-Proteobacteria	0	0	0	74.961
Corynebacterium ammoniagenes ws2211	Actinobacteria	Raoultella ornithinolytica TL332	g-Proteobacteria	0	0	0	71.609
Corynebacterium ammoniagenes ws2211	Actinobacteria	Glutamicibacter arilaitensis GMPA29	Actinobacteria	0	0	0	86.364
Corynebacterium ammoniagenes ws2211	Actinobacteria	Microbacterium gubbeenense DSM 15944	Actinobacteria	0	0	0	87.613
Corynebacterium ammoniagenes ws2211	Actinobacteria	Staphylococcus fleuretti CIP106114	Firmicutes	0	0	0	78.598
Corynebacterium ammoniagenes ws2211	Actinobacteria	Vagococcus fluvialis bH819	Firmicutes	0	0	0	74.779
Corynebacterium ammoniagenes ws2211	Actinobacteria	Providencia heimbachae GR4	g-Proteobacteria	0	0	0	76.932
Corynebacterium ammoniagenes ws2211	Actinobacteria	Pantoea agglomerans PCAiQ6.3	g-Proteobacteria	0	0	0	75.051
Corynebacterium ammoniagenes ws2211	Actinobacteria	Agrococcus casei LMG22410	Actinobacteria	0	0	0	87.605
Corynebacterium ammoniagenes ws2211	Actinobacteria	Psychrobacter faecalis H5	g-Proteobacteria	0	0	0	76.503
Corynebacterium ammoniagenes ws2211	Actinobacteria	Kocuria carniphila CRBM38	Actinobacteria	0	0	0	86.398
Corynebacterium ammoniagenes ws2211	Actinobacteria	Lactobacillus casei BD-II	Firmicutes	0	0	0	79.095
[truncated: 11,251 more rows]

## Sheet: Supplementary file 1c
Groups by distance between hits vs. ANI
	Distance between hits (bp)
ANI (%)	2000	3500	5000
80	104	93	92
85	243	201	191
90	332	276	259
Hits by length of 99% identity vs. ANI
	Length of 99% identity (bp)
ANI (%)	500	300	100
75	1479
78	1481
80	1555	1871	2395
81	1686
82	1877
83	2364
84	2597
85	2777	3550	4796
86	2898
87	3043
88	4178
89	4843
90	4843	6111	7899
93	4982
95	5000

## Sheet: Supplementary file 1d
	group	locus_tag	contig	start	end	length	strand	annotation	id	dna_seq	ko1	ko2	ko3
Alkalibacterium kapii FAM208 38	1	BN278_00885	french_0011	861	1377	516	1	Phage-related integrase/recombinase	58482be3ea064b5890f7ec54	GTGCGCCTGGACTTGCCCGATCTGCGTCCGAACCCGCACATGCGAGCTTGGGGCACCTATGGGTCGATCCATGTGCGGTTCGGGAAAGCGATGAAAGGCTCATTGCCGAGGCGCCGCACGGTTCTCGCTGTTCCCGAGTTCGATTGGGCCGTCAATGGTCTGCGGCAATGGGTCGAAGAGGGGCTGCCCCTGTTCGAGGCGGGCAACCAGGCCGCACTCTGGCTGACCGAGCGGCGCAGCCGGGTCAGTGTCCGCCACGTCGATGAACTCTTCGCCGACACACGCAGCGAGATCGGCCTTGAAGAGCACTTGACCCTGCATTGCCTGCGGCACTCGTATGTGACCCATCTGATCGAGTTCGGCTACCCGGAGCACTTCGTCACCGAACAGGTCGGGCAC…
Alkalibacterium kapii FAM208 38	1	BN278_00895	french_0011	1708	2836	1128	1	hypothetical protein	58482be3ea064b5890f7ec56	GTGAATGCACGCCGGGCACCGGTCTGCATCCGATGCGAGCGACTGACCGGATCATTCGAGTTACCAGAGGGAAAGATCTGTCAGAACTGCTGTCGCTACCTCGCTTATCACCCCGCCCGCTGCCCAGGCTGCAGCCAGTTTCGCCCCTTGCCCTACCTCTCAGTGACCGCACCTGCACAGTTGATTTGTGCCGACTGCGCGGGGAAGCCGCCCGTGTTCGTCTGTGAGAAGTGTGGTCGTCAAGATCAGCCCTATGGGGTTCGTCGTTGCGCTTCCTGCGTTCTGAGCGAACGCCTCCATGTGCTGCTGCTTGATCCCCGCACCGGAGAGATCCACGAACGTCTTCGGCCAGTCTTCGACGCGCTCGTGGGGTCGCATCGGCCGCAGAACGCGATTACC…
Alkalibacterium kapii FAM208 38	1	BN278_00910	french_0011	3125	3683	558	-1	hypothetical protein	58482be3ea064b5890f7ec59	GTGGGCCGAAAAGAGCGGTTGGCGTCACGCGAGCGCCTTCAGCGAATTCGACTTCTGAGTTCTGAACTCGACACGCTCCGTAACGCAGCGATCGAACGCACTCGGTCAATCGACACGAAGTCCTCGTTTGTCGTTGTCGCCGCCGGAGTGCTTGCGGGGGCAACCTTCACAGGCTTAGTCGATGCCCGATCGTGGTACCTCGGGTTAGTGCCGTTCGCGCTCACTGTCGCAACGATCATTGCCGCGGCGGTCTCGCTCTGGCCGTCGACGATTGACTCGCCTTCCGGCCGATTCCTTGTCACTCGATGGGTTAATGCTTCTGAGCGTATGGAAGCGATGGAGGACTACATCCTCGAAGTGAAGGTACGCGAAATCGAGAAACGAAACTCGAAGAATGAG…
Alkalibacterium kapii FAM208 38	1	BN278_00915	french_0012	547	1438	891	-1	Major facilitator superfamily	58482be3ea064b5890f7ec5c	ATGTCTTGGCTTCTCGGTGGCAGGATCGTGCAAGGTGCCGCCGCGGCAAGCTTCGCCCCATCGGTTTTCGCATACTTCGGTGCACGCCTGCCGACCGCTGTCCGCTTAATCGCCGTGACCGTACTGACCAGTTCTTTTCTTGCTGCCGCGGTGCTTGCGCAGGTCCTCGCGCAGCTCGTCGTGTTAGCGGGCTCATGGCGCTGGTTCTTCATCCTCAGCGCGATCACCCTGACTTTAGGGCTGGTGCTTGCCATGCGTGGTCTGCGGCCTACTCCCGGCAGCGCAGAAACTGGTCAGAACGCCACGAGGATACTTGCAGGCCTTTTGGGCAGGTTGCGCATTGTCTTACTGTTAATCGCAACGCTGGCGATCCTTGGCCCATTCATCGCGCTCTACGCA…
Alkalibacterium kapii FAM208 38	1	BN278_00925	french_0012	3033	3714	681	1	Transcriptional regulator TetR family	58482be3ea064b5890f7ec5e	TTGGTCGGGAGGTGGGCATACACATCACGCTACAACCAACTGGTTAGTTGGGCAACTATCTGGTTGGTTGCTTCTCAGTGGTGGAGCTTCTACGCTGGGGACATGGCTGGACCAGAAAACACCAAACGAGCGCTCCTTGAGGCGGGCCGTGAGGAGTTCGCGAAGCACGGACTTGCCGGAGCGCGTACGGATAGAATCGCCGCGAATTCCGGTGTGAATAAGCAACGTATCTACGCATATTTCGGCAGCAAACAAGGCATGTTCCATGCCGTGTTATCTGACGCACTGGATTCTCTGCTCGGAATTGTCCCGTATCCCAAAGGAGACTTGCCGCCAGGAGAGTTCCTCTCCGCGTATCTACAAGCAGTCAATGCTTACCATGCCAAGCATCCGGACCTG…
Alkalibacterium kapii FAM208 38	1	BN278_00930	french_0012	3885	5475	1590	-1	Transcriptional regulator AraC family	58482be3ea064b5890f7ec5f	GTGCTGTTCGACCCACCACCGGTGCCTACCTCCCAAGCAGTGTCTGTGCACAACACACGTGACCCCTCCCTCTTATGGGTGCACGCGGGAACCGCAGAGGTTCGCGCAGCGCAACAGGAGTACCTACTCTCCTCCGGGCAGGGCATATGGTTGCCTGCCGGTATCCCCTACACCGTGGAGGTGGGCGCTGACTCAGTCGCATTCCCGATCTTCCCAGCCGCAGGAACCCGCGCGCCGAACCTCGACCGACCCCAGCGCATCAATCTCTCAAACAGCTGGTCCGAGTGGCTCATCTACCAGTTCGCGCGGAGTATCGGCTACCTTCGGGGCGCAACCTCCGACACCAGCCTCCTCGATCTGGTTGCCGGGTCTCGCTACGCGACACCTAAGGAAGAAGCG…
Alkalibacterium kapii FAM208 38	1	BN278_08405	french_0100	9	1068	1059	1	ABC-type Fe3+-siderophore transport system permease component	58482be4ea064b5890f7f2e9	ATGACTGTTTCGTTAGTAGGTGCGCGCGAGGCGTGCAGTGCGCTGGGAGAAGGGCACCTCCCAACAAGCAACCGTCGAATATCGGGTGTGATTGTGCTGCTCGCGTTGCTTGTGGTGGTTCTGGCAGCAAGCCTGTCATTCGGCGCGAACCCGTTACCCATCAGCGAGATCTGGCGGGTCGTACTCTCCCCAGATAGCTCCGAGGCAAGCTCCATTGTCTGGACATTACGAGTACCTCGCACGGTTGTGGGGATTGCTGCTGGTGTGGCATTCGGTGTTTCGGGCGCGCTCATCCAGGCGATCACACGCAACCCGCTTGCCGATCCCGGTATTCTCGGCGTAAATGCCGGAGCGGGGTTCGCCATTGTCGTTGGCGTGACGTTGTTCGGAGTCGGAGGA…	K02015
Alkalibacterium kapii FAM208 38	1	BN278_08410	french_0100	1064	2144	1080	1	ABC-type Fe3+-siderophore transport system permease 2 component	58482be4ea064b5890f7f2ea	ATGAAATCCACTATTCAAATCCCACGACAGATCGATTTCGGTTACCGGAACCGCACAATCCGTACTCAGCGCGCCGTCGCGCTGAGATTCAGCGCACGGAGCATTGCGATCAACTCGATCCTCGCCGTAGTTGCGGTGACCGTTGCGGTGATGTCCCTCGGAATCGGTGACTATCCACTGACAACTGCCCAGGTTGTCCAGTCGCTCTTCGGCCAGGGCGATGACTTCCATCGCCTGATCGTGACGGAATGGCGTCTGCCCATCGCGATCGCGGCAATCCTGTTCGGAGCGCTACTGGGGATCGGCGGTGCAATCTTCCAATCGCTGACCCGCAACCCCCTGGGATCTCCGGATGTAATCGGCTTCGACGCAGGATCGTACACGGCCGTGGTGCTCACA…	K02015
Alkalibacterium kapii FAM208 38	1	BN278_08415	french_0100	2140	3025	885	1	ABC-type Fe3+-siderophore transport system ATPase component	58482be4ea064b5890f7f2eb	ATGACACGAGTGGACACTCACCCCCTCGCCACTGCTAACACCGCCGAGTTGACCGTACCGACAAGTCGACTGTGGACGGTGAATGCCACGATCGGCTATGACAAGCGCGTCATCAACGAGAACCTGTCGGTGTCGATTCCCGATGAGTCTTTCACCGTGATCGTCGGGCCGAATGCATGCGGCAAGTCGACCCTTCTGCGCGGGCTATCCAGGCTCCTGAAACCAGGATCAGGGCGGGTGGTACTTGACGGACAAGACATCCATTCCTACAAGGCCAAAGAGGTTGCGCGCAAGTTGGGACTGCTACCGCAGACCTCGCTCGCTCCCGATGGGATCAGAGTCGCTGATCTGGTCGCTCGCGGCCGGTATCCGTACCAGAAACTGATCCGACAGTGGACA…	K02013
Alkalibacterium kapii FAM208 38	1	BN278_08420	french_0100	3024	4125	1101	1	ABC transporter related	58482be4ea064b5890f7f2ec	GTGCCCGCACTCAACAATGACCCTGCGGCCGCACCGGCCTCACCCATTGCGGCCGCACTGCGCCCCGCGATCCCTGTGCTTACAGCAGCGGTTACCGCCGCCGCGCTTGGTGGCCTCACGATGGTCGGAGCCTTATGGTTCACCGTGCAGGTCGTCGCTGCGGTGACACTGACGCATGCGATTTCGGCGTGTGTCTGCTGGCTCATTGGAGGCCTGCTCCTGTCCGTCTCGTCGTGGCTCGCACATCACGGGGAGGCAAGATTCTCCGCACGGCTACGGCGCGATACCGCTCGCCATCTCGCGCACATGCCGATGAGCACGGTCTCACGGTATGGCGCTGACGCGCTGCGTCGTCTGGTAGGCGAAGACATTGCCGCGCTACACCACACCGTCGCACAT…
Brachybacterium alimentarium 341_9	1	Ga0115316_1021	Ga0115316_102	114	1401	1287	1	Transposase	58482e1cea064b5890f9320b	GTGCACGAGAATACTGGTTCGCAGCGGGATGCTGCGAGCACGATCTTCAACTTGCCCAATTACCGCGTCATCGATGCCGTCGACCTGCCCGATGGTGGCCGGCGGGTGGTGATCGCCTCGACCGTCCCGCCGGGCTGTCCGTCCTGCGGGGTGCTCGCAACGAAGGTCCACTCCCGACGGTCACAGCAAGTCAGGGACGTTCCCGTCGCCGGCGCGGCGGTGGTGGTGTGGGCCAAGCGGCGCTGGTTCTGCCTGGAGCCGGCCTGTGCTCGGGGCACGTTCGCTGAGGCCACCGAGCAGATCCCCCGTTACGCCCGCTCGACGACCAGGCTGCGGGACCAGGTCGTCTCGGCCGTGATCACCTCGGGCCGTGCAGCTTCCGAGGTGGCCCGGGCCCAC…
Brachybacterium alimentarium 341_9	1	Ga0115316_1321	Ga0115316_132	33	1389	1356	-1	Transposase (or an inactivated derivative)	58482e25ea064b5890f94b5f	ATGACCATGACCAACGAGAAGCAGCAGCCGGGCGGTGAGCCGTCGGGCCAGGATTTGGTCGAGCAGTTGAAGGCCTCCGGACAGCTCGATGCACTGTTCGCGCAGATCGACGCGGGCAAGGTCGAGCTGACCGGCGACAGCGGGTTCGTGCCCGCGCTGGTCAAGGCCGCGCTCGAGCGAGGTCTGCAGGCCGAGCTGACCAGCCATCTGGGCTATGAGAAGGGCTCCGAGGACGCGGCGAAGCACGCCAACTCCCGTAACGGCACGACGCCAAAGAAGGTCGAGTCCGAGGTCGGGCCGATCGAGCTGGACGTGCCCCGCGACCGGGGAGGCTCGTTCACCCCGCGCCTGGTCCCCAAGGGGCAGCGCCGTCTGGGCGGGCTCGATGACATGATCATC…
Brachybacterium alimentarium 341_9	1	Ga0115316_1491	Ga0115316_149	397	976	579	1	transcriptional regulator TetR family	58482e25ea064b5890f94dcc	ATGGCTGGACCAGAAAACACCAAACGAGCGCTCCTTGAGGCGGGCCGTGAGGAGTTCGCGAAGCACGGACTTGCCGGAGCTCGTACGGATAGAATCGCCGCGAATTCCGGTGTGAATAAGCAACGTATCTACGCATATTTCGGCAGCAAACAAGGCATGTTCCATGCCGTGTTATCTGACGCACTGGATTCTCTGCTCGGAATTGTCCCGTATCCCAAAGGAGACTTGCCGCCAGGAGAGTTCCTCTCCGCGTATCTACAAGCAGTCAATGCTTACCATGCCAAGCATCCGGACCTGTTGCGCCTGTTGCAATGGGAAGCACTCGAACCCGACACCGTCGAACCGGAGAGTGATTCCAGATCGGTGTACTACCAGGATAAAGTCACTTCCTTGGCACAA…
Brachybacterium alimentarium 341_9	1	Ga0115316_1492	Ga0115316_149	1147	2737	1590	-1	AraC-type DNA-binding protein	58482e25ea064b5890f94dce	GTGCTGTTCGACCCACCACCGGTGCCTACCTCCCAAGCAGTGTCTGTGCACAACACACGTGACCCCTCCCTCTTATGGGTGCACGCGGGAACCGCAGAGGTTCGCGCAGCGCAACAGGAGTACCTACTCTCCTCCGGGCAGGGCATATGGTTGCCTGCCGGTATCCCCTACACCGTGGAGGTGGGCGCTGACTCAGTCGCATTCCCGATCTTCCCAGCCGCAGGAACCCGCGCGCCGAACCTCGACCGACCCCAGCGCATCAATCTCTCAAACAGCTGGTCCGAGTGGCTCATCTACCAGTTCGCGCGGAGTATCGGCTACCTTCGGGGCGCAACCTCCGACACCAGCCTCCTCGATCTGGTTGCCGGGTCTCGCTACGCGACACCTAAGGAAGAAGCG…
Brachybacterium alimentarium 341_9	1	Ga0115316_1493	Ga0115316_149	2901	3723	822	1	NADPH-dependent ferric siderophore reductase contains FAD-binding and SIP domains	58482e25ea064b5890f94dd0	ATGAGTGTGTCTGCACGTACGTTGCGCTTGGTTCCAGTAGCGCTGCGTGAACTTGCTGTAGGCCGCGTTGTGGACGTGACTTCGGGGATGAAGCGGATCACGATGACGGGGAGCCAGTTGGGTGAGTTCACCTCGCCAGGGGGAGATCTGCAACCAGCTTTCACCTCACCGGGGTTCGATGACGATATTCGTTTGCTGTTTCCCTATCCAGGTGAGAGTGAGCCGGTCTTGCCTGTGATCGAAAATGGCCGCGTAACGTTCGCGGAAGGGAGGCGCCCCATCGCACGGGCGTACTCGGTGCGACGTTACGACTCGGAATCGCGTGAGCTGGATGTTGATTTCGTGCTGCATGGGCACGGGGTTGCGGCCGATTGGGCTCGGCGGGCACGACCTGGTGAC…
Brachybacterium alimentarium 341_9	1	Ga0115316_1494	Ga0115316_149	3810	4998	1188	1	Fucose permease	58482e25ea064b5890f94dd2	ATGTCAACCACCCTCGCGGCACGCCGCTTGGCGCTTTGTGCATTGTTTCTATTGCCGGGTCTGGCAATGTCGGCCTGGGTCACGCGCACACCAGCGATTCGCGATTTGCTCGGAGCCTCAACCGCGCAGATGGGTATCGTGATCTTTGGTCTATCACTAGGGGCGATGGCGGGGATTCTCTGTTCAGGGCCGCTGTTGGCTCGACTTGGCGCAAAGCCACTGATCGCATTCGGCACGTTGGGTGTAGCCGTGAGCGTGCCCCTCATAGGTCTTGGCGCGGCAGCCCAGATCGACGGATTCGTCATCGCGGCATTGGCGTTGTTCGGTCTGAGCATGGGCGGTAGCGAGATTGCACTGAACGTTGAGGGCGCAGATGTCGAAGCCATCTCTGGCAGACCG…
Brachybacterium alimentarium 341_9	1	Ga0115316_1495	Ga0115316_149	4994	6083	1089	1	iron complex transport system substrate-binding protein	58482e25ea064b5890f94dd4	ATGAGCCGTTCGCAAGCTAAGCCTTCTCGCATCCTCAGCAGCATCTGTGTTGTTCTCACCATTTCCTTGTTCGCTTCAAGCTGCTCGGCAAAGCCCGAATCCGATAATGCAACAAGACACCCTGAGCAAGCATCTTTACTGCCAGCGGCCGAGCAGACTACAAGCTATCCGCTGACGCTCGAATCACCGTTCGGTGAGACTGTTCTTCCGGAACGGCCTGAACGCATTGCAGCGGTCGCCCCGACAGCGATCGACACTGAGCTGCTTCTCGCCCTCGGCGTGACCCCCATTCTCACGTCAAGTCTCGTGAGTGAAGGCGGTTATCTCGACGATCATGGGGCAGCAGAAATTGAAACCTACGAGTTCGTGTCCGGTGAAGACCTTCCGATAGAAACCATC…	K02016
Brachybacterium alimentarium 341_9	1	Ga0115316_1496	Ga0115316_149	6132	7197	1065	1	iron complex transport system substrate-binding protein	58482e25ea064b5890f94dd6	ATGAAGAAGACCAGACGCTCCCGCGTCGCTGCCAGTATCGGGGCGAGCCTCGCGACAATACTGCTCATCGCGGGCTGCTCCACGAGCCCGGACTCCAACGACAGTCCTGAAGAGCCCGGCGCAAGCGAATCAAGCCTGCTCCCTGCCGCTGAAGGCAAGACCAGTTACCCTCTGACGCTCGAATCACCGTACGGAGAGACGATCCTCGAGGAGCGCCCTGAGCGGATCGCAGCGATCGTCCCGAACGCGATCGACACCGAGTTGCTGCTTTCCTTAGGGGTCACGCCTGTGTTGACCTCGAACTTCGTAAGCGAGGGCGGCTACCTCGAAGAGCATGGGTCAGCCGAGCTGGACACCTACGAGTTCATGATGGGCGAAGACATCCCCATCGAGGCCATC…	K02016
Brachybacterium alimentarium 341_9	1	Ga0115316_1497	Ga0115316_149	7541	8336	795	1	iron complex transport system permease protein	58482e25ea064b5890f94dd8	GTGGCATTCGGTGTTTCGGGCGCGCTCATCCAGGCGATCACACGCAACCCGCTTGCCGATCCCGGTATTCTCGGCGTAAATGCCGGAGCGGGGTTCGCCATTGTCGTTGGCGTGACGTTGTTCGGAGTCGGAGGAATCACCGGGTACATCTGGTTTTCGTTCATCGGTGCGATCCTTGCCACGGTGCTCGTCTACCTGATCGGGTCAGCGGGACGAGGCGCCTCATCTCCCGTCACACTCGTGCTCGCAGGCATCGCACTTGCCGCTGTCCTCTCAGCTTTCTCAACGTTTCTGACACTGATGGATCAGGAGACGTTCCGTTCCTTCCGGGCTTGGGGGTTGGGTTCCCTCTCGCGCGCCTCACTCGATGACACCGCTTCGGTTGCCCCGTTTCTGGCG…	K02015
Brachybacterium alimentarium 341_9	1	Ga0115316_1498	Ga0115316_149	8332	9412	1080	1	iron complex transport system permease protein	58482e25ea064b5890f94dda	ATGAAATCCACTATTCAAATCCCACGACAGATCGATTTCGGTTACCGGAACCGCACAATCCGTACTCAGCGCGCCGTCGCGCTGAGATTCAGCGCACGGAGCATTGCGATCAACTCGATCCTCGCCGTAGTTGCGGTGACCGTTGCGGTGATGTCCCTCGGAATCGGTGACTATCCACTGACAACTGCCCAGGTTGTCCAGTCGCTCTTCGGCCAGGGCGATGACTTCCATCGCCTGATCGTGACGGAATGGCGTCTGCCCATCGCGATCGCGGCAATCCTGTTCGGAGCGCTACTGGGGATCGGCGGTGCAATCTTCCAATCGCTGACCCGCAACCCCCTGGGATCTCCGGATGTAATCGGCTTCGACGCAGGATCGTACACGGCCGTGGTGCTCACA…	K02015
Brachybacterium alimentarium 341_9	1	Ga0115316_1499	Ga0115316_149	9408	10293	885	1	iron complex transport system ATP-binding protein	58482e25ea064b5890f94ddc	ATGACACGAGTGGACACTCACCCCCTCGCCACTGCTAACACCGCCGAGTTGACCGTACCGACAAGTCGACTGTGGACGGTGAATGCCACGATCGGCTATGACAAGCGCGTCATCAACGAGAACCTGTCGGTGTCGATTCCCGATGAGTCTTTCACCGTGATCGTCGGGCCGAATGCATGCGGCAAGTCGACCCTTCTGCGCGGGCTATCCAGGCTCCTGAAACCAGGATCAGGGCGGGTGGTACTTGACGGACAAGACATCCATTCCTACAAGGCCAAAGAGGTTGCGCGCAAGTTGGGACTGCTACCGCAGACCTCGCTCGCTCCCGATGGGATCAGAGTCGCTGATCTGGTCGCTCGCGGCCGGTATCCGTACCAGAAACTGATCCGACAGTGGACA…	K02013
Brachybacterium alimentarium 341_9	1	Ga0115316_14910	Ga0115316_149	10292	11900	1608	1	ABC-type multidrug transport system ATPase and permease component	58482e25ea064b5890f94dde	GTGCCCGCACTCAACAATGACCCTGCGGCCGCACCGGCCTCACCCATTGCGGCCGCACTGCGCCCCGCGATCCCTGTGCTTACAGCAGCGGTTACCGCCGCCGCGCTTGGTGGCCTCACGATGGTCGGAGCCTTATGGTTCACCGTGCAGGTCGTCGCTGCGGTGACACTGACGCATGCGATTTCGGCGTGTGTCTGCTGGCTCATTGGAGGCCTGCTCCTGTCCGTCTCGTCGTGGCTCGCACATCACGGGGAGGCAAGATTCTCCGCACGGCTACGGCGCGATACCGCTCGCCATCTCGCGCACATGCCGATGAGCACGGTCTCACGGTATGGCGCTGACGCGCTGCGTCGTCTGGTAGGCGAAGACATTGCCGCGCTACACCACACCGTCGCACAT…
Brachybacterium alimentarium 341_9	1	Ga0115316_14911	Ga0115316_149	11896	13495	1599	1	ABC-type multidrug transport system ATPase and permease component	58482e25ea064b5890f94de0	ATGAACACGCAGCACACCCAGACCCTTCCTGCAGCGGCTCGCCGCAGACTGGTACTCATATCACTTGGCTGGGCACTCGTCGCGCTGGCCGAGGCGACGGCCTACACCGTGCTCGCCCTTGCGATCGCAAAGCACCAGCCACCGGGAATGGTGATCGCGACTGCGGCCGTCGCCCTGTTTATCACCGTGCTCGTCTCGCGCAGCGGCTACCTCACCGGGGCAAGGCTGGCCGGAGATCTCTTCCAAGGAGTTGGCGCGGCCTTCTCCCACGCCAAACTCTCGTGGTTCACCGAGAAGAACCGAACTCTTGTCGGCACGGTCGCCGGACAATCAATCCCCGCCCTGATGAGCGTTCCCGCCCATCAGCTGCAGACGTTCATTCTCTCGCCGCTCATCCCG…
Brachybacterium alimentarium 738_10	1	Ga0115317_1151	Ga0115317_115	2	1163	1161	-1	Transposase	58482e2aea064b5890f95c8a	AATACTGGTTCGCAGCGGGATGCTGCGAGCACGATCTTCAACTTGCCCAATTACCGCGTCATCGATGCCGTCGACCTGCCCGATGGTGGCCGGCGGGTGGTGATCGCCTCGACCGTCCCGCCGGGCTGTCCGTCCTGCGGGGTGCTCGCAACGAAGGTCCACTCCCGACGGTCACAGCAAGTCAGGGACGTTCCCGTCGCCGGCGCGGCGGTGGTGGTGTGGGCCAAGCGGCGCTGGTTCTGCCTGGAGCCGGCCTGTGCTCGGGGCACGTTCGCTGAGGCCACCGAGCAGATCCCCCGTTACGCCCGCTCGACGACCAGGCTGCGGGACCAGGTCGTCTCGGCCGTGATCACCTCGGGCCGTGCAGCTTCCGAGGTGGCCCGGGCCCACGGGGTCTCG…
Brachybacterium alimentarium 738_10	1	Ga0115317_1293	Ga0115317_129	3566	4922	1356	-1	Transposase (or an inactivated derivative)	58482e2bea064b5890f961ed	ATGACCATGACCAACGAGAAGCAGCAGCCGGGCGGTGAGCCGTCGGGCCAGGATTTGGTCGAGCAGTTGAAGGCCTCCGGACAGCTCGATGCACTGTTCGCGCAGATCGACGCGGGCAAGGTCGAGCTGACCGGCGACAGCGGGTTCGTGCCCGCGCTGGTCAAGGCCGCGCTCGAGCGAGGTCTGCAGGCCGAGCTGACCAGCCATCTGGGCTATGAGAAGGGCTCCGAGGACGCGGCGAAGCACGCCAACTCCCGTAACGGCACGACGCCAAAGAAGGTCGAGTCCGAGGTCGGGCCGATCGAGCTGGACGTGCCCCGCGACCGGGGAGGCTCGTTCACCCCGCGCCTGGTCCCCAAGGGGCAGCGCCGTCTGGGCGGGCTCGATGACATGATCATC…
Brachybacterium alimentarium 738_10	1	Ga0115317_1352	Ga0115317_135	443	2042	1599	-1	ABC-type multidrug transport system ATPase and permease component	58482e2cea064b5890f964a2	ATGAACACGCAGCACACCCAGACCCTTCCTGCAGCGGCTCGCCGCAGACTGGTACTCATATCACTTGGCTGGGCACTCGTCGCGCTGGCCGAGGCGACGGCCTACACCGTGCTCGCCCTTGCGATCGCAAAGCACCAGCCACCGGGAATGGTGATCGCGACTGCGGCCGTCGCCCTGTTTATCACCGTGCTCGTCTCGCGCAGCGGCTACCTCACCGGGGCAAGGCTGGCCGGAGATCTCTTCCAAGGAGTTGGCGCGGCCTTCTCCCACGCCAAACTCTCGTGGTTCACCGAGAAGAACCGAACTCTTGTCGGCACGGTCGCCGGACAATCAATCCCCGCCCTGATGAGCGTTCCCGCCCATCAGCTGCAGACGTTCATTCTCTCGCCGCTCATCCCG…
Brachybacterium alimentarium 738_10	1	Ga0115317_1353	Ga0115317_135	2038	3646	1608	-1	ABC-type multidrug transport system ATPase and permease component	58482e2cea064b5890f964a4	GTGCCCGCACTCAACAATGACCCTGCGGCCGCACCGGCCTCACCCATTGCGGCCGCACTGCGCCCCGCGATCCCTGTGCTTACAGCAGCGGTTACCGCCGCCGCGCTTGGTGGCCTCACGATGGTCGGAGCCTTATGGTTCACCGTGCAGGTCGTCGCTGCGGTGACACTGACGCATGCGATTTCGGCGTGTGTCTGCTGGCTCATTGGAGGCCTGCTCCTGTCCGTCTCGTCGTGGCTCGCACATCACGGGGAGGCAAGATTCTCCGCACGGCTACGGCGCGATACCGCTCGCCATCTCGCGCACATGCCGATGAGCACGGTCTCACGGTATGGCGCTGACGCGCTGCGTCGTCTGGTAGGCGAAGACATTGCCGCGCTACACCACACCGTCGCACAT…
Brachybacterium alimentarium 738_10	1	Ga0115317_1354	Ga0115317_135	3645	4530	885	-1	iron complex transport system ATP-binding protein	58482e2cea064b5890f964a6	ATGACACGAGTGGACACTCACCCCCTCGCCACTGCTAACACCGCCGAGTTGACCGTACCGACAAGTCGACTGTGGACGGTGAATGCCACGATCGGCTATGACAAGCGCGTCATCAACGAGAACCTGTCGGTGTCGATTCCCGATGAGTCTTTCACCGTGATCGTCGGGCCGAATGCATGCGGCAAGTCGACCCTTCTGCGCGGGCTATCCAGGCTCCTGAAACCAGGATCAGGGCGGGTGGTACTTGACGGACAAGACATCCATTCCTACAAGGCCAAAGAGGTTGCGCGCAAGTTGGGACTGCTACCGCAGACCTCGCTCGCTCCCGATGGGATCAGAGTCGCTGATCTGGTCGCTCGCGGCCGGTATCCGTACCAGAAACTGATCCGACAGTGGACA…	K02013
Brachybacterium alimentarium 738_10	1	Ga0115317_1355	Ga0115317_135	4526	5606	1080	-1	iron complex transport system permease protein	58482e2cea064b5890f964a8	ATGAAATCCACTATTCAAATCCCACGACAGATCGATTTCGGTTACCGGAACCGCACAATCCGTACTCAGCGCGCCGTCGCGCTGAGATTCAGCGCACGGAGCATTGCGATCAACTCGATCCTCGCCGTAGTTGCGGTGACCGTTGCGGTGATGTCCCTCGGAATCGGTGACTATCCACTGACAACTGCCCAGGTTGTCCAGTCGCTCTTCGGCCAGGGCGATGACTTCCATCGCCTGATCGTGACGGAATGGCGTCTGCCCATCGCGATCGCGGCAATCCTGTTCGGAGCGCTACTGGGGATCGGCGGTGCAATCTTCCAATCGCTGACCCGCAACCCCCTGGGATCTCCGGATGTAATCGGCTTCGACGCAGGATCGTACACGGCCGTGGTGCTCACA…	K02015
Brachybacterium alimentarium 738_10	1	Ga0115317_1356	Ga0115317_135	5602	6397	795	-1	iron complex transport system permease protein	58482e2cea064b5890f964aa	GTGGCATTCGGTGTTTCGGGCGCGCTCATCCAGGCGATCACACGCAACCCGCTTGCCGATCCCGGTATTCTCGGCGTAAATGCCGGAGCGGGGTTCGCCATTGTCGTTGGCGTGACGTTGTTCGGAGTCGGAGGAATCACCGGGTACATCTGGTTTTCGTTCATCGGTGCGATCCTTGCCACGGTGCTCGTCTACCTGATCGGGTCAGCGGGACGAGGCGCCTCATCTCCCGTCACACTCGTGCTCGCAGGCATCGCACTTGCCGCTGTCCTCTCAGCTTTCTCAACGTTTCTGACACTGATGGATCAGGAGACGTTCCGTTCCTTCCGGGCTTGGGGGTTGGGTTCCCTCTCGCGCGCCTCACTCGATGACACCGCTTCGGTTGCCCCGTTTCTGGCG…	K02015
Brachybacterium alimentarium 738_10	1	Ga0115317_1357	Ga0115317_135	6741	7806	1065	-1	iron complex transport system substrate-binding protein	58482e2cea064b5890f964ac	ATGAAGAAGACCAGACGCTCCCGCGTCGCTGCCAGTATCGGGGCGAGCCTCGCGACAATACTGCTCATCGCGGGCTGCTCCACGAGCCCGGACTCCAACGACAGTCCTGAAGAGCCCGGCGCAAGCGAATCAAGCCTGCTCCCTGCCGCTGAAGGCAAGACCAGTTACCCTCTGACGCTCGAATCACCGTACGGAGAGACGATCCTCGAGGAGCGCCCTGAGCGGATCGCAGCGATCGTCCCGAACGCGATCGACACCGAGTTGCTGCTTTCCTTAGGGGTCACGCCTGTGTTGACCTCGAACTTCGTAAGCGAGGGCGGCTACCTCGAAGAGCATGGGTCAGCCGAGCTGGACACCTACGAGTTCATGATGGGCGAAGACATCCCCATCGAGGCCATC…	K02016
Brachybacterium alimentarium 738_10	1	Ga0115317_1358	Ga0115317_135	7855	8944	1089	-1	iron complex transport system substrate-binding protein	58482e2cea064b5890f964ae	ATGAGCCGTTCGCAAGCTAAGCCTTCTCGCATCCTCAGCAGCATCTGTGTTGTTCTCACCATTTCCTTGTTCGCTTCAAGCTGCTCGGCAAAGCCCGAATCCGATAATGCAACAAGACACCCTGAGCAAGCATCTTTACTGCCAGCGGCCGAGCAGACTACAAGCTATCCGCTGACGCTCGAATCACCGTTCGGTGAGACTGTTCTTCCGGAACGGCCTGAACGCATTGCAGCGGTCGCCCCGACAGCGATCGACACTGAGCTGCTTCTCGCCCTCGGCGTGACCCCCATTCTCACGTCAAGTCTCGTGAGTGAAGGCGGTTATCTCGACGATCATGGGGCAGCAGAAATTGAAACCTACGAGTTCGTGTCCGGTGAAGACCTTCCGATAGAAACCATC…	K02016
Brachybacterium alimentarium 738_10	1	Ga0115317_1359	Ga0115317_135	8940	10128	1188	-1	Fucose permease	58482e2cea064b5890f964b0	ATGTCAACCACCCTCGCGGCACGCCGCTTGGCGCTTTGTGCATTGTTTCTATTGCCGGGTCTGGCAATGTCGGCCTGGGTCACGCGCACACCAGCGATTCGCGATTTGCTCGGAGCCTCAACCGCGCAGATGGGTATCGTGATCTTTGGTCTATCACTAGGGGCGATGGCGGGGATTCTCTGTTCAGGGCCGCTGTTGGCTCGACTTGGCGCAAAGCCACTGATCGCATTCGGCACGTTGGGTGTAGCCGTGAGCGTGCCCCTCATAGGTCTTGGCGCGGCAGCCCAGATCGACGGATTCGTCATCGCGGCATTGGCGTTGTTCGGTCTGAGCATGGGCGGTAGCGAGATTGCACTGAACGTTGAGGGCGCAGATGTCGAAGCCATCTCTGGCAGACCG…
Brachybacterium alimentarium 738_10	1	Ga0115317_13510	Ga0115317_135	10215	11037	822	-1	NADPH-dependent ferric siderophore reductase contains FAD-binding and SIP domains	58482e2cea064b5890f964b2	ATGAGTGTGTCTGCACGTACGTTGCGCTTGGTTCCAGTAGCGCTGCGTGAACTTGCTGTAGGCCGCGTTGTGGACGTGACTTCGGGGATGAAGCGGATCACGATGACGGGGAGCCAGTTGGGTGAGTTCACCTCGCCAGGGGGAGATCTGCAACCAGCTTTCACCTCACCGGGGTTCGATGACGATATTCGTTTGCTGTTTCCCTATCCAGGTGAGAGTGAGCCGGTCTTGCCTGTGATCGAAAATGGCCGCGTAACGTTCGCGGAAGGGAGGCGCCCCATCGCACGGGCGTACTCGGTGCGACGTTACGACTCGGAATCGCGTGAGCTGGATGTTGATTTCGTGCTGCATGGGCACGGGGTTGCGGCCGATTGGGCTCGGCGGGCACGACCTGGTGAC…
Brachybacterium alimentarium 738_10	1	Ga0115317_13511	Ga0115317_135	11201	12791	1590	1	AraC-type DNA-binding protein	58482e2cea064b5890f964b4	GTGCTGTTCGACCCACCACCGGTGCCTACCTCCCAAGCAGTGTCTGTGCACAACACACGTGACCCCTCCCTCTTATGGGTGCACGCGGGAACCGCAGAGGTTCGCGCAGCGCAACAGGAGTACCTACTCTCCTCCGGGCAGGGCATATGGTTGCCTGCCGGTATCCCCTACACCGTGGAGGTGGGCGCTGACTCAGTCGCATTCCCGATCTTCCCAGCCGCAGGAACCCGCGCGCCGAACCTCGACCGACCCCAGCGCATCAATCTCTCAAACAGCTGGTCCGAGTGGCTCATCTACCAGTTCGCGCGGAGTATCGGCTACCTTCGGGGCGCAACCTCCGACACCAGCCTCCTCGATCTGGTTGCCGGGTCTCGCTACGCGACACCTAAGGAAGAAGCG…
Brachybacterium alimentarium 738_10	1	Ga0115317_13512	Ga0115317_135	12962	13541	579	-1	transcriptional regulator TetR family	58482e2cea064b5890f964b6	ATGGCTGGACCAGAAAACACCAAACGAGCGCTCCTTGAGGCGGGCCGTGAGGAGTTCGCGAAGCACGGACTTGCCGGAGCTCGTACGGATAGAATCGCCGCGAATTCCGGTGTGAATAAGCAACGTATCTACGCATATTTCGGCAGCAAACAAGGCATGTTCCATGCCGTGTTATCTGACGCACTGGATTCTCTGCTCGGAATTGTCCCGTATCCCAAAGGAGACTTGCCGCCAGGAGAGTTCCTCTCCGCGTATCTACAAGCAGTCAATGCTTACCATGCCAAGCATCCGGACCTGTTGCGCCTGTTGCAATGGGAAGCACTCGAACCCGACACCGTCGAACCGGAGAGTGATTCCAGATCGGTGTACTACCAGGATAAAGTCACTTCCTTGGCACAA…
Brachybacterium alimentarium 862_8	1	Ga0115318_10351	Ga0115318_1035	72	1359	1287	-1	Transposase	58482e33ea064b5890f98178	GTGCACGAGAATACTGGTTCGCAGCGGGATGCTGCGAGCACGATCTTCAACTTGCCCAATTACCGCGTCATCGATGCCGTCGACCTGCCCGATGGTGGCCGGCGGGTGGTGATCGCCTCGACCGTCCCGCCGGGCTGTCCGTCCTGCGGGGTGCTCGCAACGAAGGTCCACTCCCGACGGTCACAGCAAGTCAGGGACGTTCCCGTCGCCGGCGCGGCGGTGGTGGTGTGGGCCAAGCGGCGCTGGTTCTGCCTGGAGCCGGCCTGTGCTCGGGGCACGTTCGCTGAGGCCACCGAGCAGATCCCCCGTTACGCCCGCTCGACGACCAGGCTGCGGGACCAGGTCGTCTCGGCCGTGATCACCTCGGGCCGTGCAGCTTCCGAGGTGGCCCGGGCCCAC…
Brachybacterium alimentarium 862_8	1	Ga0115318_10574	Ga0115318_1057	2603	3959	1356	1	Transposase (or an inactivated derivative)	58482e35ea064b5890f98659	ATGACCATGACCAACGAGAAGCAGCAGCCGGGCGGTGAGCCGTCGGGCCAGGATTTGGTCGAGCAGTTGAAGGCCTCCGGACAGCTCGATGCACTGTTCGCGCAGATCGACGCGGGCAAGGTCGAGCTGACCGGCGACAGCGGGTTCGTGCCCGCGCTGGTCAAGGCCGCGCTCGAGCGAGGTCTGCAGGCCGAGCTGACCAGCCATCTGGGCTATGAGAAGGGCTCCGAGGACGCGGCGAAGCACGCCAACTCCCGTAACGGCACGACGCCAAAGAAGGTCGAGTCCGAGGTCGGGCCGATCGAGCTGGACGTGCCCCGCGACCGGGGAGGCTCGTTCACCCCGCGCCTGGTCCCCAAGGGGCAGCGCCGTCTGGGCGGGCTCGATGACATGATCATC…
Brachybacterium alimentarium 862_8	1	Ga0115318_10691	Ga0115318_1069	174	753	579	-1	transcriptional regulator TetR family	58482e35ea064b5890f987d1	ATGGCTGGACCAGAAAACACCAAACGAGCGCTCCTTGAGGCGGGCCGTGAGGAGTTCGCGAAGCACGGACTTGCCGGAGCTCGTACGGATAGAATCGCCGCGAATTCCGGTGTGAATAAGCAACGTATCTACGCATATTTCGGCAGCAAACAAGGCATGTTCCATGCCGTGTTATCTGACGCACTGGATTCTCTGCTCGGAATTGTCCCGTATCCCAAAGGAGACTTGCCGCCAGGAGAGTTCCTCTCCGCGTATCTACAAGCAGTCAATGCTTACCATGCCAAGCATCCGGACCTGTTGCGCCTGTTGCAATGGGAAGCACTCGAACCCGACACCGTCGAACCGGAGAGTGATTCCAGATCGGTGTACTACCAGGATAAAGTCACTTCCTTGGCACAA…
Brachybacterium alimentarium 862_8	1	Ga0115318_10861	Ga0115318_1086	44	1634	1590	-1	AraC-type DNA-binding protein	58482e35ea064b5890f988bd	GTGCTGTTCGACCCACCACCGGTGCCTACCTCCCAAGCAGTGTCTGTGCACAACACACGTGACCCCTCCCTCTTATGGGTGCACGCGGGAACCGCAGAGGTTCGCGCAGCGCAACAGGAGTACCTACTCTCCTCCGGGCAGGGCATATGGTTGCCTGCCGGTATCCCCTACACCGTGGAGGTGGGCGCTGACTCAGTCGCATTCCCGATCTTCCCAGCCGCAGGAACCCGCGCGCCGAACCTCGACCGACCCCAGCGCATCAATCTCTCAAACAGCTGGTCCGAGTGGCTCATCTACCAGTTCGCGCGGAGTATCGGCTACCTTCGGGGCGCAACCTCCGACACCAGCCTCCTCGATCTGGTTGCCGGGTCTCGCTACGCGACACCTAAGGAAGAAGCG…
Brachybacterium alimentarium 862_8	1	Ga0115318_10862	Ga0115318_1086	1798	2620	822	1	NADPH-dependent ferric siderophore reductase contains FAD-binding and SIP domains	58482e35ea064b5890f988bf	ATGAGTGTGTCTGCACGTACGTTGCGCTTGGTTCCAGTAGCGCTGCGTGAACTTGCTGTAGGCCGCGTTGTGGACGTGACTTCGGGGATGAAGCGGATCACGATGACGGGGAGCCAGTTGGGTGAGTTCACCTCGCCAGGGGGAGATCTGCAACCAGCTTTCACCTCACCGGGGTTCGATGACGATATTCGTTTGCTGTTTCCCTATCCAGGTGAGAGTGAGCCGGTCTTGCCTGTGATCGAAAATGGCCGCGTAACGTTCGCGGAAGGGAGGCGCCCCATCGCACGGGCGTACTCGGTGCGACGTTACGACTCGGAATCGCGTGAGCTGGATGTTGATTTCGTGCTGCATGGGCACGGGGTTGCGGCCGATTGGGCTCGGCGGGCACGACCTGGTGAC…
Brachybacterium alimentarium 862_8	1	Ga0115318_10863	Ga0115318_1086	2707	3895	1188	1	Fucose permease	58482e35ea064b5890f988c1	ATGTCAACCACCCTCGCGGCACGCCGCTTGGCGCTTTGTGCATTGTTTCTATTGCCGGGTCTGGCAATGTCGGCCTGGGTCACGCGCACACCAGCGATTCGCGATTTGCTCGGAGCCTCAACCGCGCAGATGGGTATCGTGATCTTTGGTCTATCACTAGGGGCGATGGCGGGGATTCTCTGTTCAGGGCCGCTGTTGGCTCGACTTGGCGCAAAGCCACTGATCGCATTCGGCACGTTGGGTGTAGCCGTGAGCGTGCCCCTCATAGGTCTTGGCGCGGCAGCCCAGATCGACGGATTCGTCATCGCGGCATTGGCGTTGTTCGGTCTGAGCATGGGCGGTAGCGAGATTGCACTGAACGTTGAGGGCGCAGATGTCGAAGCCATCTCTGGCAGACCG…
Brachybacterium alimentarium 862_8	1	Ga0115318_10864	Ga0115318_1086	3891	4980	1089	1	iron complex transport system substrate-binding protein	58482e35ea064b5890f988c3	ATGAGCCGTTCGCAAGCTAAGCCTTCTCGCATCCTCAGCAGCATCTGTGTTGTTCTCACCATTTCCTTGTTCGCTTCAAGCTGCTCGGCAAAGCCCGAATCCGATAATGCAACAAGACACCCTGAGCAAGCATCTTTACTGCCAGCGGCCGAGCAGACTACAAGCTATCCGCTGACGCTCGAATCACCGTTCGGTGAGACTGTTCTTCCGGAACGGCCTGAACGCATTGCAGCGGTCGCCCCGACAGCGATCGACACTGAGCTGCTTCTCGCCCTCGGCGTGACCCCCATTCTCACGTCAAGTCTCGTGAGTGAAGGCGGTTATCTCGACGATCATGGGGCAGCAGAAATTGAAACCTACGAGTTCGTGTCCGGTGAAGACCTTCCGATAGAAACCATC…	K02016
Brachybacterium alimentarium 862_8	1	Ga0115318_10865	Ga0115318_1086	5029	6094	1065	1	iron complex transport system substrate-binding protein	58482e35ea064b5890f988c5	ATGAAGAAGACCAGACGCTCCCGCGTCGCTGCCAGTATCGGGGCGAGCCTCGCGACAATACTGCTCATCGCGGGCTGCTCCACGAGCCCGGACTCCAACGACAGTCCTGAAGAGCCCGGCGCAAGCGAATCAAGCCTGCTCCCTGCCGCTGAAGGCAAGACCAGTTACCCTCTGACGCTCGAATCACCGTACGGAGAGACGATCCTCGAGGAGCGCCCTGAGCGGATCGCAGCGATCGTCCCGAACGCGATCGACACCGAGTTGCTGCTTTCCTTAGGGGTCACGCCTGTGTTGACCTCGAACTTCGTAAGCGAGGGCGGCTACCTCGAAGAGCATGGGTCAGCCGAGCTGGACACCTACGAGTTCATGATGGGCGAAGACATCCCCATCGAGGCCATC…	K02016
Brachybacterium alimentarium 862_8	1	Ga0115318_10866	Ga0115318_1086	6438	7233	795	1	iron complex transport system permease protein	58482e35ea064b5890f988c7	GTGGCATTCGGTGTTTCGGGCGCGCTCATCCAGGCGATCACACGCAACCCGCTTGCCGATCCCGGTATTCTCGGCGTAAATGCCGGAGCGGGGTTCGCCATTGTCGTTGGCGTGACGTTGTTCGGAGTCGGAGGAATCACCGGGTACATCTGGTTTTCGTTCATCGGTGCGATCCTTGCCACGGTGCTCGTCTACCTGATCGGGTCAGCGGGACGAGGCGCCTCATCTCCCGTCACACTCGTGCTCGCAGGCATCGCACTTGCCGCTGTCCTCTCAGCTTTCTCAACGTTTCTGACACTGATGGATCAGGAGACGTTCCGTTCCTTCCGGGCTTGGGGGTTGGGTTCCCTCTCGCGCGCCTCACTCGATGACACCGCTTCGGTTGCCCCGTTTCTGGCG…	K02015
Brachybacterium alimentarium 862_8	1	Ga0115318_10867	Ga0115318_1086	7229	8309	1080	1	iron complex transport system permease protein	58482e35ea064b5890f988c9	ATGAAATCCACTATTCAAATCCCACGACAGATCGATTTCGGTTACCGGAACCGCACAATCCGTACTCAGCGCGCCGTCGCGCTGAGATTCAGCGCACGGAGCATTGCGATCAACTCGATCCTCGCCGTAGTTGCGGTGACCGTTGCGGTGATGTCCCTCGGAATCGGTGACTATCCACTGACAACTGCCCAGGTTGTCCAGTCGCTCTTCGGCCAGGGCGATGACTTCCATCGCCTGATCGTGACGGAATGGCGTCTGCCCATCGCGATCGCGGCAATCCTGTTCGGAGCGCTACTGGGGATCGGCGGTGCAATCTTCCAATCGCTGACCCGCAACCCCCTGGGATCTCCGGATGTAATCGGCTTCGACGCAGGATCGTACACGGCCGTGGTGCTCACA…	K02015
Brachybacterium alimentarium 862_8	1	Ga0115318_10868	Ga0115318_1086	8305	9190	885	1	iron complex transport system ATP-binding protein	58482e35ea064b5890f988cb	ATGACACGAGTGGACACTCACCCCCTCGCCACTGCTAACACCGCCGAGTTGACCGTACCGACAAGTCGACTGTGGACGGTGAATGCCACGATCGGCTATGACAAGCGCGTCATCAACGAGAACCTGTCGGTGTCGATTCCCGATGAGTCTTTCACCGTGATCGTCGGGCCGAATGCATGCGGCAAGTCGACCCTTCTGCGCGGGCTATCCAGGCTCCTGAAACCAGGATCAGGGCGGGTGGTACTTGACGGACAAGACATCCATTCCTACAAGGCCAAAGAGGTTGCGCGCAAGTTGGGACTGCTACCGCAGACCTCGCTCGCTCCCGATGGGATCAGAGTCGCTGATCTGGTCGCTCGCGGCCGGTATCCGTACCAGAAACTGATCCGACAGTGGACA…	K02013
Brachybacterium alimentarium 862_8	1	Ga0115318_10869	Ga0115318_1086	9189	10797	1608	1	ABC-type multidrug transport system ATPase and permease component	58482e35ea064b5890f988cd	GTGCCCGCACTCAACAATGACCCTGCGGCCGCACCGGCCTCACCCATTGCGGCCGCACTGCGCCCCGCGATCCCTGTGCTTACAGCAGCGGTTACCGCCGCCGCGCTTGGTGGCCTCACGATGGTCGGAGCCTTATGGTTCACCGTGCAGGTCGTCGCTGCGGTGACACTGACGCATGCGATTTCGGCGTGTGTCTGCTGGCTCATTGGAGGCCTGCTCCTGTCCGTCTCGTCGTGGCTCGCACATCACGGGGAGGCAAGATTCTCCGCACGGCTACGGCGCGATACCGCTCGCCATCTCGCGCACATGCCGATGAGCACGGTCTCACGGTATGGCGCTGACGCGCTGCGTCGTCTGGTAGGCGAAGACATTGCCGCGCTACACCACACCGTCGCACAT…
Brachybacterium alimentarium 862_8	1	Ga0115318_108610	Ga0115318_1086	10793	12392	1599	1	ABC-type multidrug transport system ATPase and permease component	58482e35ea064b5890f988cf	ATGAACACGCAGCACACCCAGACCCTTCCTGCAGCGGCTCGCCGCAGACTGGTACTCATATCACTTGGCTGGGCACTCGTCGCGCTGGCCGAGGCGACGGCCTACACCGTGCTCGCCCTTGCGATCGCAAAGCACCAGCCACCGGGAATGGTGATCGCGACTGCGGCCGTCGCCCTGTTTATCACCGTGCTCGTCTCGCGCAGCGGCTACCTCACCGGGGCAAGGCTGGCCGGAGATCTCTTCCAAGGAGTTGGCGCGGCCTTCTCCCACGCCAAACTCTCGTGGTTCACCGAGAAGAACCGAACTCTTGTCGGCACGGTCGCCGGACAATCAATCCCCGCCCTGATGAGCGTTCCCGCCCATCAGCTGCAGACGTTCATTCTCTCGCCGCTCATCCCG…
Brachybacterium alimentarium 876_9	1	Ga0115319_10431	Ga0115319_1043	366	945	579	1	transcriptional regulator TetR family	58482e3bea064b5890f9a172	ATGGCTGGACCAGAAAACACCAAACGAGCGCTCCTTGAGGCGGGCCGTGAGGAGTTCGCGAAGCACGGACTTGCCGGAGCTCGTACGGATAGAATCGCCGCGAATTCCGGTGTGAATAAGCAACGTATCTACGCATATTTCGGCAGCAAACAAGGCATGTTCCATGCCGTGTTATCTGACGCACTGGATTCTCTGCTCGGAATTGTCCCGTACCCCAAAGGAGACTTGCCGCCAGGAGAGTTCCTCTCCGCGTATCTACAAGCAGTCAATGCTTACCATGCCAAGCATCCGGACCTGTTGCGCCTGTTGCAATGGGAAGCACTCGAACCCGACACCGTCGAACCGGAGAGTGATTCCAGATCGGTGTACTACCAGGATAAAGTCACTTCCTTGGCACAA…
Brachybacterium alimentarium 876_9	1	Ga0115319_10432	Ga0115319_1043	1116	2706	1590	-1	AraC-type DNA-binding protein	58482e3bea064b5890f9a174	GTGCTGTTCGACCCACCACCGGTGCCTACCTCCCAAGCAGTGTCTGTGCACAACACACGTGACCCCTCCCTCTTATGGGTGCACGCGGGAACCGCAGAGGTTCGCGCAGCGCAACAGGAGTACCTACTCTCCTCCGGGCAGGGCATATGGTTGCCTGCCGGTATCCCCTACACCGTGGAGGTGGGCGCTGACTCAGTCGCATTCCCGATCTTCCCAGCCGCAGGAACCCGCGCGCCGAACCTCGACCGACCCCAGCGCATCAATCTCTCAAACAGCTGGTCCGAGTGGCTCATCTACCAGTTCGCGCGGAGTATCGGCTACCTTCGGGGCGCAACCTCCGACACCAGCCTCCTCGATCTGGTTGCCGGGTCTCGCTACGCGACACCTAAGGAAGAAGCG…
Brachybacterium alimentarium 876_9	1	Ga0115319_10433	Ga0115319_1043	2870	3692	822	1	NADPH-dependent ferric siderophore reductase contains FAD-binding and SIP domains	58482e3bea064b5890f9a176	ATGAGTGTGTCTGCACGTACGTTGCGCTTGGTTCCAGTAGCGCTGCGTGAACTTGCTGTAGGCCGCGTTGTGGACGTGACTTCGGGGATGAAGCGGATCACGCTGACGGGGAGCCAGTTGGGTGAGTTCACCTCGCCAGGGGGAGATCTGCAACCAGCTTTCACCTCACCGGGGTTCGATGACGATATTCGTTTGCTGTTTCCCTATCCAGGTGAGAGTGAGCCGGTCTTGCCTGTGATCGAAAATGGCCGCGTAACGTTCGCGGAAGGGAGGCGCCCCATCGCACGGGCGTACTCGGTGCGACGTTACGACTCGGAATCGCGTGAGCTGGATGTTGATTTCGTGCTGCATGGGCACGGGGTTGCGGCCGATTGGGCTCGGCGGGCACGACCTGGTGAC…
Brachybacterium alimentarium 876_9	1	Ga0115319_10434	Ga0115319_1043	3779	4967	1188	1	Fucose permease	58482e3bea064b5890f9a178	ATGTCAACCACCCTCGCGGCACGCCGCTTGGCGCTTTGTGCATTGTTTCTATTGCCGGGTCTGGCAATGTCGGCCTGGGTCACGCGCACACCAGCGATTCGCGATTTGCTCGGAGCCTCAACCGCGCAGATGGGTATCGTGATCTTTGGTCTATCACTAGGGGCGATGGCGGGGATTCTCTGTTCAGGGCCGCTGTTGGCTCGACTTGGCGCAAAGCCACTGATCGCATTCGGCACGTTGGGTGTAGCCGTGAGCGTGCCCCTCATAGGTCTTGGCGCGGCAGCCCAGATCGACGGATTCGTCATCGCGGCATTGGCGTTGTTCGGTCTGAGCATGGGCGGTAGCGAGATTGCACTGAACGTTGAGGGCGCAGATGTCGAAGCCATCTCTGGCAGACCG…
Brachybacterium alimentarium 876_9	1	Ga0115319_10435	Ga0115319_1043	4963	6052	1089	1	iron complex transport system substrate-binding protein	58482e3bea064b5890f9a17a	ATGAGCCGTTCGCAAGCTAAGCCTTCTCGCATCCTCAGCAGCATCTGTGTTGTTCTCACCATTTCCTTGTTCGCTGCAAGCTGCTCGGCAAAGCCCGAATCCGATAATGCAACAAGACACCCTGAGCAAGCATCTTTACTGCCAGCGGCCGAGCAGACTACAAGCTATCCGCTGACGCTCGAATCACCGTTCGGTGAGACTGTTCTTCCGGAACGGCCTGAACGCATTGCAGCGGTCGCCCCGACAGCGATCGACACTGAGCTGCTTCTCGCCCTCGGCGTGACCCCCATTCTCACGTCAAGTCTCGTGAGTGAAGGCGGTTATCTCGACGATCATGGGGCAGCAGAAATTGAAACCTACGAGTTCGTGTCCGGTGAAGACCTTCCGATAGAAACCATC…	K02016
Brachybacterium alimentarium 876_9	1	Ga0115319_10436	Ga0115319_1043	6101	7166	1065	1	iron complex transport system substrate-binding protein	58482e3bea064b5890f9a17c	ATGAAGAAGACCAGACGCTCCCGCGTCGCTGCCAGTATCGGGGCGAGCCTCGCGACAATACTGCTCATCGCGGGCTGCTCCACGAGCCCGGACTCCAACGACAGTCCTGAAGAGCCCGGCGCAAGCGAATCAAGCCTGCTCCCTGCCGCTGAAGGCAAGACCAGTTACCCTCTGACGCTCGAATCACCGTACGGAGAGACGATCCTCGAGGAGCGCCCTGAGCGGATCGCAGCGATCGTCCCGAACGCGATCGACACCGAGTTGCTGCTTTCCTTAGGGGTCACGCCTGTGTTGACCTCGAACTTCGTAAGCGAGGGCGGCTACCTCGAAGAGCATGGGTCAGCCGAGCTGGACACCTACGAGTTCATGATGGGCGAAGACATCCCCATCGAGGCCATC…	K02016
Brachybacterium alimentarium 876_9	1	Ga0115319_10437	Ga0115319_1043	7510	8305	795	1	iron complex transport system permease protein	58482e3bea064b5890f9a17e	GTGGCATTCGGTGTTTCGGGCGCGCTCATCCAGGCGATCACACGCAACCCGCTTGCCGATCCCGGTATTCTCGGCGTAAATGCCGGAGCGGGGTTCGCCATTGTCGTTGGCGTGACGTTGTTCGGAGTCGGAGGAATCACCGGGTACATCTGGTTTTCGTTCATCGGTGCGATCCTTGCCACGGTGCTCGTCTACCTGATCGGGTCAGCGGGACGAGGCGCCTCATCTCCCGTCACACTCGTGCTCGCAGGCATCGCACTTGCCGCTGTCCTCTCAGCTTTCTCAACGTTTCTGACACTGATGGATCAGGAGACGTTCCGTTCCTTCCGGGCTTGGGGGTTGGGTTCCCTCTCGCGCGCCTCACTCGATGACACCGCTTCGGTTGCCCCGTTTCTGGCG…	K02015
Brachybacterium alimentarium 876_9	1	Ga0115319_10438	Ga0115319_1043	8301	9381	1080	1	iron complex transport system permease protein	58482e3bea064b5890f9a180	ATGAAATCCACTATTCAAATCCCACGACAGATCGATTTCGGTTACCGGAACCGCACAATCCGTACTCAGCGCGCCGTCGCGCTGAGATTCAGCGCACGGAGCATTGCGATCAACTCGATCCTCGCCGTAGTTGCGGTGACCGTTGCGGTGATGTCCCTCGGAATCGGTGACTATCCACTGACAACTGCCCAGGTTGTCCAGTCGCTCTTCGGCCAGGGCGATGACTTCCATCGCCTGATCGTGACGGAATGGCGTCTGCCCATCGCGATCGCGGCAATCCTGTTCGGAGCGCTACTGGGGATCGGCGGTGCAATCTTCCAATCGCTGACCCGCAACCCCCTGGGATCTCCGGATGTAATCGGCTTCGACGCAGGATCGTACACGGCCGTGGTGCTCACA…	K02015
Brachybacterium alimentarium 876_9	1	Ga0115319_10439	Ga0115319_1043	9377	10262	885	1	iron complex transport system ATP-binding protein	58482e3bea064b5890f9a182	ATGACACGAGTGGACACTCACCCCCTCGCCACTGCTAACACCGCCGAGTTGACCGTACCGACAAGTCGACTGTGGACGGTGAATGCCACGATCGGCTATGACAAGCGCGTCATCAACGAGAACCTGTCGGTGTCGATTCCCGATGAGTCTTTCACCGTGATCGTCGGGCCGAATGCATGCGGCAAGTCGACCCTTCTGCGCGGGCTATCCAGGCTCCTGAAACCAGGATCAGGGCGGGTGGTACTTGACGGACAAGACATCCATTCCTACAAGGCCAAAGAGGTTGCGCGCAAGTTGGGACTGCTACCGCAGACCTCGCTCGCTCCCGATGGGATCAGAGTCGCTGATCTGGTCGCTCGCGGCCGGTATCCGTACCAGAAACTGATCCGACAGTGGACA…	K02013
Brachybacterium alimentarium 876_9	1	Ga0115319_104310	Ga0115319_1043	10261	11869	1608	1	ABC-type multidrug transport system ATPase and permease component	58482e3bea064b5890f9a184	GTGCCCGCACTCAACAATGACCCTGCGGCCGCACCGGCCTCACCCATTGCGGCCGCACTGCGCCCCGCGATCCCTGTGCTTACAGCAGCGGTTACCGCCGCCGCGCTTGGTGGCCTCACGATGGTCGGAGCCTTATGGTTCACCGTGCAGGTCGTCGCTGCGGTGACACTGACGCATGCGATTTCGGCGTGTGTCTGCTGGCTCATTGGAGGCCTGCTCCTGTCCGTCTCGTCGTGGCTCGCACATCACGGGGAGGCAAGATTCTCCGCACGGCTACGGCGCGATACCGCTCGCCATCTCGCGCACATGCCGATGAGCACGGTCTCACGGTATGGCGCTGACGCGCTGCGTCGTCTGGTAGGCGAAGACATTGCCGCGCTACACCACACCGTCGCACAT…
Brachybacterium alimentarium 876_9	1	Ga0115319_104311	Ga0115319_1043	11865	13464	1599	1	ABC-type multidrug transport system ATPase and permease component	58482e3bea064b5890f9a186	ATGAACACGCAGCACACCCAGACCCTTCCTGCAGCGGCTCGCCGCAGACTGGTACTCATATCACTTGGCTGGGCACTCGTCGCGCTGGCCGAGGCGACGGCCTACACCGTGCTCGCCCTTGCGATCGCAAAGCACCAGCCACCGGGAATGGTGATCGCGACTGCGGCCGTCGCCCTGTTTATCACCGTGCTCGTCTCGCGCAGCGGCTACCTCACCGGGGCAAGGCTGGCCGGAGATCTCTTCCAAGGAGTTGGCGCGGCCTTCTCCCACGCCAAACTCTCGTGGTTCACCGAGAAGAACCGAACTCTTGTCGGCACGGTCGCCGGACAATCAATCCCCGCCCTGATGAGCGTTCCCGCCCATCAGCTGCAGACGTTCATTCTCTCGCCGCTCATCCCG…
Brachybacterium alimentarium 900_8	1	Ga0115320_1753	Ga0115320_175	1630	2986	1356	-1	Transposase (or an inactivated derivative)	58482e45ea064b5890f9c1e9	ATGACCATGACCAACGAGAAGCAGCAGCCGGGCGGTGAGCCGTCGGGCCAGGATTTGGTCGAGCAGTTGAAGGCCTCCGGACAGCTCGATGCACTGTTCGCGCAGATCGACGCGGGCAAGGTCGAGCTGACCGGCGACAGCGGGTTCGTGCCCGCGCTGGTCAAGGCCGCGCTCGAGCGAGGTCTGCAGGCCGAGCTGACCAGCCATCTGGGCTATGAGAAGGGCTCCGAGGACGCGGCGAAGCACGCCAACTCCCGTAACGGCACGACGCCAAAGAAGGTCGAGTCCGAGGTCGGGCCGATCGAGCTGGACGTGCCCCGCGACCGGGGAGGCTCGTTCACCCCGCGCCTGGTCCCCAAGGGGCAGCGCCGTCTGGGCGGGCTCGATGACATGATCATC…
Brachybacterium alimentarium 908_11	1	Ga0115321_13310	Ga0115321_133	12679	14035	1356	-1	Transposase (or an inactivated derivative)	58482e4dea064b5890f9db45	ATGACCATGACCAACGAGAAGCAGCAGCCGGGCGGTGAGCCGTCGGGCCAGGATTTGGTCGAGCAGTTGAAGGCCTCCGGACAGCTCGATGCACTGTTCGCGCAGATCGACGCGGGCAAGGTCGAGCTGACCGGCGACAGCGGGTTCGTGCCCGCGCTGGTCAAGGCCGCGCTCGAGCGAGGTCTGCAGGCCGAGCTGACCAGCCATCTGGGCTATGAGAAGGGCTCCGAGGACGCGGCGAAGCACGCCAACTCCCGTAACGGCACGACGCCAAAGAAGGTCGAGTCCGAGGTCGGGCCGATCGAGCTGGACGTGCCCCGCGACCGGGGAGGCTCGTTCACCCCGCGCCTGGTCCCCAAGGGGCAGCGCCGTCTGGGCGGGCTCGATGACATGATCATC…
Brachybacterium alimentarium 962_10	1	Ga0115323_1261	Ga0115323_126	33	1389	1356	-1	Transposase (or an inactivated derivative)	58482e5bea064b5890fa0f42	ATGACCATGACCAACGAGAAGCAGCAGCCGGGCGGTGAGCCGTCGGGCCAGGATTTGGTCGAGCAGTTGAAGGCCTCCGGACAGCTCGATGCACTGTTCGCGCAGATCGACGCGGGCAAGGTCGAGCTGACCGGCGACAGCGGGTTCGTGCCCGCGCTGGTCAAGGCCGCGCTCGAGCGAGGTCTGCAGGCCGAGCTGACCAGCCATCTGGGCTATGAGAAGGGCTCCGAGGACGCGGCGAAGCACGCCAACTCCCGTAACGGCACGACGCCAAAGAAGGTCGAGTCCGAGGTCGGGCCGATCGAGCTGGACGTGCCCCGCGACCGGGGAGGCTCGTTCACCCCGCGCCTGGTCCCCAAGGGGCAGCGCCGTCTGGGCGGGCTCGATGACATGATCATC…
Brachybacterium alimentarium 962_10	1	Ga0115323_1501	Ga0115323_150	60	1659	1599	-1	ABC-type multidrug transport system ATPase and permease component	58482e5cea064b5890fa1518	ATGAACACGCAGCACACCCAGACCCTTCCTGCAGCGGCTCGCCGCAGACTGGTACTCATATCACTTGGCTGGGCACTCGTCGCGCTGGCCGAGGCGACGGCCTACACCGTGCTCGCCCTTGCGATCGCAAAGCACCAGCCACCGGGAATGGTGATCGCGACTGCGGCCGTCGCCCTGTTTATCACCGTGCTCGTCTCGCGCAGCGGCTACCTCACCGGGGCAAGGCTGGCCGGAGATCTCTTCCAAGGAGTTGGCGCGGCCTTCTCCCACGCCAAACTCTCGTGGTTCACCGAGAAGAACCGAACTCTTGTCGGCACGGTCGCCGGACAATCAATCCCCGCCCTGATGAGCGTTCCCGCCCATCAGCTGCAGACGTTCATTCTCTCGCCGCTCATCCCG…
Brachybacterium alimentarium 962_10	1	Ga0115323_1502	Ga0115323_150	1655	3263	1608	-1	ABC-type multidrug transport system ATPase and permease component	58482e5cea064b5890fa151a	GTGCCCGCACTCAACAATGACCCTGCGGCCGCACCGGCCTCACCCATTGCGGCCGCACTGCGCCCCGCGATCCCTGTGCTTACAGCAGCGGTTACCGCCGCCGCGCTTGGTGGCCTCACGATGGTCGGAGCCTTATGGTTCACCGTGCAGGTCGTCGCTGCGGTGACACTGACGCATGCGATTTCGGCGTGTGTCTGCTGGCTCATTGGAGGCCTGCTCCTGTCCGTCTCGTCGTGGCTCGCACATCACGGGGAGGCAAGATTCTCCGCACGGCTACGGCGCGATACCGCTCGCCATCTCGCGCACATGCCGATGAGCACGGTCTCACGGTATGGCGCTGACGCGCTGCGTCGTCTGGTAGGCGAAGACATTGCCGCGCTACACCACACCGTCGCACAT…
Brachybacterium alimentarium 962_10	1	Ga0115323_1503	Ga0115323_150	3262	4147	885	-1	iron complex transport system ATP-binding protein	58482e5cea064b5890fa151c	ATGACACGAGTGGACACTCACCCCCTCGCCACTGCTAACACCGCCGAGTTGACCGTACCGACAAGTCGACTGTGGACGGTGAATGCCACGATCGGCTATGACAAGCGCGTCATCAACGAGAACCTGTCGGTGTCGATTCCCGATGAGTCTTTCACCGTGATCGTCGGGCCGAATGCATGCGGCAAGTCGACCCTTCTGCGCGGGCTATCCAGGCTCCTGAAACCAGGATCAGGGCGGGTGGTACTTGACGGACAAGACATCCATTCCTACAAGGCCAAAGAGGTTGCGCGCAAGTTGGGACTGCTACCGCAGACCTCGCTCGCTCCCGATGGGATCAGAGTCGCTGATCTGGTCGCTCGCGGCCGGTATCCGTACCAGAAACTGATCCGACAGTGGACA…	K02013
Brachybacterium alimentarium 962_10	1	Ga0115323_1504	Ga0115323_150	4143	5223	1080	-1	iron complex transport system permease protein	58482e5cea064b5890fa151e	ATGAAATCCACTATTCAAATCCCACGACAGATCGATTTCGGTTACCGGAACCGCACAATCCGTACTCAGCGCGCCGTCGCGCTGAGATTCAGCGCACGGAGCATTGCGATCAACTCGATCCTCGCCGTAGTTGCGGTGACCGTTGCGGTGATGTCCCTCGGAATCGGTGACTATCCACTGACAACTGCCCAGGTTGTCCAGTCGCTCTTCGGCCAGGGCGATGACTTCCATCGCCTGATCGTGACGGAATGGCGTCTGCCCATCGCGATCGCGGCAATCCTGTTCGGAGCGCTACTGGGGATCGGCGGTGCAATCTTCCAATCGCTGACCCGCAACCCCCTGGGATCTCCGGATGTAATCGGCTTCGACGCAGGATCGTACACGGCCGTGGTGCTCACA…	K02015
Brachybacterium alimentarium 962_10	1	Ga0115323_1505	Ga0115323_150	5219	6014	795	-1	iron complex transport system permease protein	58482e5cea064b5890fa1520	GTGGCATTCGGTGTTTCGGGCGCGCTCATCCAGGCGATCACACGCAACCCGCTTGCCGATCCCGGTATTCTCGGCGTAAATGCCGGAGCGGGGTTCGCCATTGTCGTTGGCGTGACGTTGTTCGGAGTCGGAGGAATCACCGGGTACATCTGGTTTTCGTTCATCGGTGCGATCCTTGCCACGGTGCTCGTCTACCTGATCGGGTCAGCGGGACGAGGCGCCTCATCTCCCGTCACACTCGTGCTCGCAGGCATCGCACTTGCCGCTGTCCTCTCAGCTTTCTCAACGTTTCTGACACTGATGGATCAGGAGACGTTCCGTTCCTTCCGGGCTTGGGGGTTGGGTTCCCTCTCGCGCGCCTCACTCGATGACACCGCTTCGGTTGCCCCGTTTCTGGCG…	K02015
Brachybacterium alimentarium 962_10	1	Ga0115323_1506	Ga0115323_150	6358	7423	1065	-1	iron complex transport system substrate-binding protein	58482e5cea064b5890fa1522	ATGAAGAAGACCAGACGCTCCCGCGTCGCTGCCAGTATCGGGGCGAGCCTCGCGACAATACTGCTCATCGCGGGCTGCTCCACGAGCCCGGACTCCAACGACAGTCCTGAAGAGCCCGGCGCAAGCGAATCAAGCCTGCTCCCTGCCGCTGAAGGCAAGACCAGTTACCCTCTGACGCTCGAATCACCGTACGGAGAGACGATCCTCGAGGAGCGCCCTGAGCGGATCGCAGCGATCGTCCCGAACGCGATCGACACCGAGTTGCTGCTTTCCTTAGGGGTCACGCCTGTGTTGACCTCGAACTTCGTAAGCGAGGGCGGCTACCTCGAAGAGCATGGGTCAGCCGAGCTGGACACCTACGAGTTCATGATGGGCGAAGACATCCCCATCGAGGCCATC…	K02016
Brachybacterium alimentarium 962_10	1	Ga0115323_1507	Ga0115323_150	7472	8561	1089	-1	iron complex transport system substrate-binding protein	58482e5cea064b5890fa1524	ATGAGCCGTTCGCAAGCTAAGCCTTCTCGCATCCTCAGCAGCATCTGTGTTGTTCTCACCATTTCCTTGTTCGCTGCAAGCTGCTCGGCAAAGCCCGAATCCGATAATGCAACAAGACACCCTGAGCAAGCATCTTTACTGCCAGCGGCCGAGCAGACTACAAGCTATCCGCTGACGCTCGAATCACCGTTCGGTGAGACTGTTCTTCCGGAACGGCCTGAACGCATTGCAGCGGTCGCCCCGACAGCGATCGACACTGAGCTGCTTCTCGCCCTCGGCGTGACCCCCATTCTCACGTCAAGTCTCGTGAGTGAAGGCGGTTATCTCGACGATCATGGGGCAGCAGAAATTGAAACCTACGAGTTCGTGTCCGGTGAAGACCTTCCGATAGAAACCATC…	K02016
Brachybacterium alimentarium 962_10	1	Ga0115323_1508	Ga0115323_150	8557	9745	1188	-1	Fucose permease	58482e5cea064b5890fa1526	ATGTCAACCACCCTCGCGGCACGCCGCTTGGCGCTTTGTGTATTGTTTCTATTGCCGGGTCTGGCAATGTCGGCCTGGGTCACGCGCACACCAGCGATTCGCGATTTGCTCGGAGCCTCAACCGCGCAGATGGGTATCGTGATCTTTGGTCTATCACTAGGGGCGATGGCGGGGATTCTCTGTTCAGGGCCGCTGTTGGCTCGACTTGGCGCAAAGCCACTGATCGCATTCGGCACGTTGGGTGTAGCCGTGAGCGTGCCCCTCATAGGTCTTGGCGCGGCAGCCCAGATCGACGGATTCGTCATCGCGGCATTGGCGTTGTTCGGTCTGAGCATGGGCGGTAGCGAGATTGCACTGAACGTTGAGGGCGCAGATGTCGAAGCCATCTCTGGCAGACCG…
Brachybacterium alimentarium 962_10	1	Ga0115323_1509	Ga0115323_150	9832	10654	822	-1	NADPH-dependent ferric siderophore reductase contains FAD-binding and SIP domains	58482e5cea064b5890fa1528	ATGAGTGTGTCTGCACGTACGTTGCGCTTGGTTCCAGTAGCGCTGCGTGAACTTGCTGTAGGCCGCGTTGTGGACGTGACTTCGGGGATGAAGCGGATCACGCTGACGGGGAGCCAGTTGGGTGAGTTCACCTCGCCAGGGGGAGATCTGCAACCAGCTTTCACCTCACCGGGGTTCGATGACGATATTCGTTTGCTGTTTCCCTATCCAGGTGAGAGTGAGCCGGTCTTGCCTGTGATCGAAAATGGCCGCGTAACGTTCGCGGAAGGGAGGCGCCCCATCGCACGGGCGTACTCGGTGCGACGTTACGACTCGGAATCGCGTGAGCTGGATGTTGATTTCGTGCTGCATGGGCACGGGGTTGCGGCCGATTGGGCTCGGCGGGCACGACCTGGTGAC…
Brachybacterium alimentarium 962_10	1	Ga0115323_15010	Ga0115323_150	10818	12408	1590	1	AraC-type DNA-binding protein	58482e5cea064b5890fa152a	GTGCTGTTCGACCCACCACCGGTGCCTACCTCCCAAGCAGTGTCTGTGCACAACACACGTGACCCCTCCCTCTTATGGGTGCACGCGGGAACCGCAGAGGTTCGCGCAGCGCAACAGGAGTACCTACTCTCCTCCGGGCAGGGCATATGGTTGCCTGCCGGTATCCCCTACACCGTGGAGGTGGGCGCTGACTCAGTCGCATTCCCGATCTTCCCAGCCGCAGGAACCCGCGCGCCGAACCTCGACCGACCCCAGCGCATCAATCTCTCAAACAGCTGGTCCGAGTGGCTCATCTACCAGTTCGCGCGGAGTATCGGCTACCTTCGGGGCGCAACCTCCGACACCAGCCTCCTCGATCTGGTTGCCGGGTCTCGCTACGCGACACCTAAGGAAGAAGCG…
Brachybacterium alimentarium 962_10	1	Ga0115323_15011	Ga0115323_150	12579	13158	579	-1	transcriptional regulator TetR family	58482e5cea064b5890fa152c	ATGGCTGGACCAGAAAACACCAAACGAGCGCTCCTTGAGGCGGGCCGTGAGGAGTTCGCGAAGCACGGACTTGCCGGAGCTCGTACGGATAGAATCGCCGCGAATTCCGGTGTGAATAAGCAACGTATCTACGCATATTTCGGCAGCAAACAAGGCATGTTCCATGCCGTGTTATCTGACGCACTGGATTCTCTGCTCGGAATTGTCCCGTATCCCAAAGGAGACTTGCCGCCAGGAGAGTTCCTCTCCGCGTATCTACAAGCAGTCAATGCTTACCATGCCAAGCATCCGGACCTGTTGCGCCTGTTGCAATGGGAAGCACTCGAACCCGACACCGTCGAACCGGAGAGTGATTCCAGATCGGTGTACTACCAGGATAAAGTCACTTCCTTGGCACAA…
Brachybacterium sp. JB7	1	Ga0099664_103221	Ga0099664_103	252627	253983	1356	-1	Transposase (or an inactivated derivative)	58482c16ea064b5890f81c93	ATGACCATGACCAACGAGAAGCAGCAGCCGGGCGGTGAGCCGTCGGGCCAGGATTTGGTCGAGCAGTTGAAGGCCTCCGGACAGCTCGATGCACTGTTCGCGCAGATCGACGCGGGCAAGGTCGAGCTGACCGGCGACAGCGGGTTCGTGCCCGCGCTGGTCAAGGCCGCGCTCGAGCGAGGTCTGCAGGCCGAGCTGACCAGCCATCTGGGCTATGAGAAGGGCTCCGAGGACGCGGCGAAGCACGCCAACTCCCGTAACGGCACGACGCCAAAGAAGGTCGAGTCCGAGGTCGGGCCGATCGAGCTGGACGTGCCCCGCGACCGGGGAGGCTCGTTCACCCCGCGCCTGGTCCCCAAGGGGCAGCGCCGTCTGGGCGGGCTCGATGACATGATCATC…
Brachybacterium sp. JB7	1	Ga0099664_11521	Ga0099664_115	27080	28436	1356	1	Transposase (or an inactivated derivative)	58482c1aea064b5890f82a83	ATGACCATGACCAACGAGAAGCAGCAGCCGGGCGGTGAGCCGTCGGGCCAGGATTTGGTCGAGCAGTTGAAGGCCTCCGGACAGCTCGATGCACTGTTCGCGCAGATCGACGCGGGCAAGGTCGAGCTGACCGGCGACAGCGGGTTCGTGCCCGCGCTGGTCAAGGCCGCGCTCGAGCGAGGTCTGCAGGCCGAGCTGACCAGCCATCTGGGCTATGAGAAGGGCTCCGAGGACGCGGCGAAGCACGCCAACTCCCGTAACGGCACGACGCCAAAGAAGGTCGAGTCCGAGGTCGGGCCGATCGAGCTGGACGTGCCCCGCGACCGGGGAGGCTCGTTCACCCCGCGCCTGGTCCCCAAGGGGCAGCGCCGTCTGGGCGGGCTCGATGACATGATCATC…
Brevibacterium antiquum CNRZ918	1	BN266_00815	french_0005	306	1002	696	1	hypothetical protein	58482edbea064b5890fbe8ca	ATGGTTGCCCCATCGGCGACCATCGGATCGGGAGTCGACTGGGCTGCGTCACAGATCCCAAACCAATACACGGATCCGGATCGCGTCGCCACGATCCTCGCCAAGCTGGGGAAACCTAAAGCAGCCAAGTACCTGAAGGGAAAGCTTCCTACAAGCAAGCGCACCCGCTCGGGCGACCTCGGAGAGATCATCGGAGCGCAGTACGCAACGCTTGAACTGGGCTTTCGAGTGGTGGAGCGGCTGCGGTGGAAGGACCACCGCGAGATGTCGATGCGTGGCGATGATTTGATTGGTGTGCGCGCGAGTACGAACGGAACGCTGGAACTATTGAAGGGTGAGGCAAAGAGCCGTGCAAGGCTCGGAACTGCAACGGTCACGGACGCAGATGATGCACTTAAG…
Brevibacterium antiquum CNRZ918	1	BN266_00820	french_0005	994	4495	3501	1	hypothetical protein	58482edbea064b5890fbe8cb	ATGCCTGAAACAGTTGATGAGATTGAGGCAGCGATCGGGCAGGCGACTGCACCCGGATTTCGTGAACAGCTTCTCGCGCGAGGAGAAGCCCGGTCGATGATCTGGCGGGACGGTGTCCTGCCAGAGGACGCGCCCGAATTCGACCAGCTGCTCAGCTACGACCTTCTCTCCTACGGCTACTCGCTCCTAAGCCTGGGGCTGCGCCTCGTGGAGGCGAATGGATCGCGCAGCCTCGCCCAACGCGCCTTTGAGGGCGCAGCCACAGCCATCGAATCAGTGATCGCGAGGGGACCCAACTCGCGCGAACGAGGCTTCCACCGCGTCGTCGCGGCAGCCGCCTACCACCTCGGCGGCTACTCCGCGCGTGCATACTCGCTGCTTCAGACAGCGCTCGATTCC…
Brevibacterium antiquum CNRZ918	1	BN266_00825	french_0005	4784	7352	2568	-1	hypothetical protein	58482edbea064b5890fbe8cc	GTGACACTCGCGAACGACCTGGCGACCTGGGTGGCTGAACGCACCGACTGGCAGAAGGATGCCGTCGGGCGCTTTTGCCGGAACGAGAATCTGTCTGAAGACGCCGTCAACGAGATCGCCGATCACCTGATCGCAGGGACGTATCCATCCGTCGCCGCCATCACCGCTGCCGATGTCCCTGGTACCTCCGAGAGCGGAGAGTCGATACGGCTGTCAGCCGTAGCCGACGTGGAGGGCGTGAACGCGCTCATCACGGGCCAGCGGTTGACCTTCGCCAGCAAGGGCCTGACGATCATCTACGGCGACAATGCCAGCGGGAAGTCCGGCTACGCCCGTCTCATTCGGCAGGCCGTTACTGCCCGAATCAAGGGTGATCTTCTCGGTGATGTCTTCGCAAAG…
Brevibacterium antiquum CNRZ918	1	BN266_00830	french_0005	7348	9154	1806	-1	hypothetical protein	58482edbea064b5890fbe8cd	GTGGACGCCTCCGACGCTCTCGGACCCGCACAGCGGTCGCGCGCATCGACGGGCATCGCCGACTCCACCCCGGTCGTCAGCTTGCGTTACCGCGTCAGCGACGAGGACCGTAAGGAGTTGGAGGACCTTGAACTCGAGGACACTCCAATCGAATTCTTCGTTAGTCGTCGTGCCGACGGTGATGGACCCAACTTCACTGTCAAGCCCGCACCTCGCAAGTCCGAGGCGCAGCTGAAGCAACTGGCAGCCGACCTGGGTGAATCCCTGTCAGCAATCAGCGTCTTAGAACCGCTTCCCATCGAAATGGCCGAGGAAGACGAAATACCAGAGCCCCCGGATGGTTCGCCGTTGCTCGATGAACTTCGCCTGCTGCGACAAGATCTCGATACCCACCTCGCT…
Brevibacterium antiquum CNRZ918	1	BN266_00835	french_0005	12119	13907	1788	1	Lipid A export ATP-binding/permease protein MsbA	58482edbea064b5890fbe8ce	ATGCGCAGGAGGAAAGCCAATGCCGACCGTAAACGAGTTGCAGGATTCCGGCAAGCATTCGGCGTGATGAGACCGTACCAGGCGGTGCTATGGTGGGCGCTGCTAATCGGAATATGCGCCGCGGGGATCTCCACCATCCAACCTATTTTCGTTTCCAGGGTCGTCGACGAGTTCAGCGGCGGAATCACCATCGGTCTGCCCATGCTCATCGTTTGCCTGCTTATTGTCGGCGCGGGGTTGACAGGAATGAAGGAACTGCTCATCGAGAGAGCCGGAGAGCGGTTCGCCTACGACACCCGAGTAGCCCTCGTCGAACTCATCTACAACCTACCAATTCCTAGACTCGAGAAACACGACAGAGCCGACATCGTCTCAAGAGTCACCTCCGACGTCACTGCG…
Brevibacterium antiquum CNRZ918	1	BN266_00840	french_0005	14004	16536	2532	1	Lanthionine biosynthesis protein LanL	58482edbea064b5890fbe8cf	ATGCCGCTCGACACTCGCTACCTGCACTACTGTCAGGCGGGGAAGCCCTTCTATCAGCCAGCTGACAATGCGGGCTCGTCCCCGGCGCTGGGCTCAGACATCGTCCAACTCACCGAGTGGACCGTCACCAGGAGTCAGCCATGGACCGTCTACGTCCCGTCCGATAGGCGATTGCCGCGCCAGGGTTGGAAGATCCATCTCTCAGCGACGAGAAGTAATCGCGCAGCAGTCCTCCGCGCAGCCTCTGAATATTGCTATCGCCACGACATTCCCTTCAAGCACCTGTCGACCGAGGCGGACTTCAAGTCGCAGAACAGCAAGTACGCGAACCGGGCATCGTCGGGGAAGTTTGTCACCGTCTATCCCGAATCCGTCGAACAGTTCGAGAAGACCCTGCGC…
Brevibacterium antiquum CNRZ918	1	BN266_00850	french_0005	16795	17530	735	1	Cell division transporter ATP-binding protein FtsE (TC 3.A.5.1.1)	58482edbea064b5890fbe8d1	ATGAACACCGCACCCACTATCCATGCCGAGCAGATTGTGAAGCTCCCCAGCGGCAACGCCTCGGCGCAGCAGCTACCGATCCTGCGCGACTGCTCAGTCGACCTCGGCGGCGGCCTGACCGCCGTCGTCGGCCCGTCCGGCGCGGGAAAGACGTCTCTGCTCTACTGCCTCAGCGGCCTCGATCGCCCCGATCGGGGCCAGGTCTCCATCAACGGTACCGACCTCTACGCGATGAGCGACGAGAGGCGCACCCGGTTCCTGCGCCAGACCGCGAGCTTCGTCTTCCAGCAGTACAACCTCATCGGCTACCTCACCGTCGAGGAGAACGTCCGGCTCCCTCACGCCCTGGCCAAACACCGAGTCGAGGTAGCCGCAGTCGAGGAGATCCTCTCCCGCTTC…	K02003
Brevibacterium antiquum CNRZ918	1	BN266_00855	french_0005	17531	18917	1386	1	ABC transporter permease protein	58482edbea064b5890fbe8d2	ATGTACAGGTACGCTCGCCGTATTCTCCTAGCCGACCTCGGCAGCTGGTGGCCGGCCATCGCCACTGTCGCCGCCGTGACTGCGCTCGTCGGCCTATGCGCCGCGCAGTTCGCCTGGACCCATGACGACCGCTTCGTCGCCGCCACCCAGGCGCAGGGCCACGCGATCACCGAATTCACCATCGTCTCCGAGACGATCTACATGCTCGTCGCCGTCCTTGCGTTGTTCTCGCTCACCGTCGTCGGCACCGCGACCGTGGAGTCGACCCGGCGCACTTTCTCCCAGTGGCGTCTCGTCGGGGCCAGTCCTGGCGACGTGCGCCGCAGCACCTGGGCGCTCGTCGCCACCGCCTCGCTCATCGGGGCAGTGCCCGGCTCCCTCGCGGGGATCGGCCTGAGC…	K02004
Brevibacterium antiquum CNRZ918	1	BN266_00860	french_0005	18926	20783	1857	1	protease II	58482edbea064b5890fbe8d3	ATGGCGCTATCCGGCTCGGAAATCGCTGAACTCGCCTATGAGGTCGAGCGCAGACGGCTGCAACCCTGGCTCGACGAGCTACGCGAGGTCAAGGAGACGACGACCGCGGAGGTACTAGGCGCCAGCGACGAAGACCTCAGAGCTCACCTTCGGGTTGGTGATACCGGCGGCCTGGTGGCGCGCTTCCCAATGCCCGACCGGAGCTGGCAGGAGATGCCGCTGCCAGCTGTCGTGGCAACCGATCTGGCGGCGTGGGCGCCTGCTGCGGACCACCGGTCCGTGGCCCTGATCTCGCGAACTCTCGACGACAACTATTCGCTATCGATTTACACGGCCGGGACGAAAGTCGGAGCATCGTCTGTGACGCACACCGAACGACGAGTCTCTTCCGGTGTCTGG…	K01354
Brevibacterium antiquum CNRZ918	1	BN266_00865	french_0005	20856	21801	945	1	UDP-glucose 4-epimerase	58482edbea064b5890fbe8d4	ATGAACGCAACAATCGGTCAGGTTCCGATGACGGTTGCGGTTGCGGGATCGACGGGCTTCATCGGCAGCGCCGTTGTTGACGAACTCGTCCGAGTGGGACATCGGGTTCGAGCACTGCGCAGGCACAGTAGCAAGGCAAGCCCTGGGGTCGAAGAGATCGTCGCGCAGGACGGCGTCGCCGACCTTCGGGCGCTCGACCGGCTCCTCACGGACAGCGATGTCCTCGTTCACGCCGTCAGTTACACGGGCGAGGACGAGGAGCTCCAGCGAACGACGAACATATCGGGCACGCGCACGCTGTGCGAGCAAGCCGCTGAGCACTCGATCAGGCGCATAGTCCACATCAGTACGGCTGGCGTCTATGGAACGGCCTTCGCGCCGGGGGTCGATGAGTCAACG…
Brevibacterium antiquum CNRZ918	1	BN266_00870	french_0005	21815	22496	681	1	possible transcriptional regulator TetR family	58482edbea064b5890fbe8d5	ATGGTGAAGGCACGACAGACGACACGCCGCACGGCGAGCCAGGACCGCGGGCGCAAGACGCAGTCGCAGATCATCGAAGGAGCGTCCGCAGTCTTCGAGGAGCAGGAGTACTCGGCGGCGAGTCTCGAGGATATCAAGGAGGCCTCTGGCGTGTCCCAGGGGTCAATGTACTTCCACTTCAAGAGCAAGGAACAGATCGCTCTAGCGATCATCCAGGAGCAGCACAATCGCATCTACGCCGGCGTGGACCCGGCGATCGCCGACCATGCCGATCCGCTCATCCGTTTAATGGCGATCTCCAAGATGATCTGTGAGCAACTGCGTACGGACTCCGTCGTGCGCGCGGGCATCAATCTCGCCCTCGGCCAAGGCTCACTGCGGGAAGCCAGCGCGCGCTCG…
Brevibacterium antiquum CNRZ918	1	BN266_00875	french_0005	22483	23068	585	-1	hypothetical protein	58482edbea064b5890fbe8d6	TTGCCGGAGACCGACCTCGAAGCCGTTCCGGTCAAGTGGAATGAAGCCATCGGCTCCGGCAAGCGGCTCACCAACATGCGATTCGGACGTATGTCGGTGAGCACCGGTGTCGAGGCCGCTTCTGCGCTTCCTTCGCTGACTGACGCGGCCGTCGAGAGGATCGGCGTTCAGCGATGGTCCAATCCGTCGTGCAGCGAGGCGCGAGCAACAGAGATCAAATCGGAAATCGTCGGCCTCGACCCTGCGCAGGGCACGCTCACCTCTGAGCACAAGGCGGCCGAATCGAGCAACGAGCTCGCACTCGGGTATGACGACTTTCTTCGCCTCTCCGCCCAGGCGGCCCAGATCCTCATCTACTCATTCGACGGGGTCGATCGGGACGTGTCAACTAACGTTTGG…
Brevibacterium antiquum CNRZ918	1	BN266_00880	french_0005	23560	26164	2604	1	Lanthionine biosynthesis protein LanL	58482edbea064b5890fbe8d7	ATGGACCAGAGCTACTACCTCCATCTTGGGGATCCGCAGTTCTATGCACCCCTGCCCGAACCCGACGATGCATTCGGCGTGCCGATGCCGCCAGGTTGGGTGTCGCGAGCGTCGTCCGACTGGCTGGCCTTCGCGCCGGCCGGGCATGAGGGCCCGAGGCAGGGCTGGAAGATCCATGTCACGGCGACCGTGGACGACGCGGCTGCCTGCATCAAGCAGGTCGCGGACGTCCTGTTCGACAAGGAAACCCCCTTCAAGGTTTGCCGCACACGGCAACGCTACGTGCGGTCGAATTCGAAGTACGGAAACCGAGCGGGGTCCGGCAAACTCATCACGGTGTACCCGGCGGACGACAACCAGTTTGTTGCTTACCTCGATTTGCTCGAGGCGTCCACAAGG…
Brevibacterium antiquum CNRZ918	1	BN266_00890	french_0005	26522	29294	2772	-1	DNA polymerase III alpha subunit	58482edbea064b5890fbe8d9	ATGCTCCAACTGGCCCGTGTCCAGGGGGTGCCGGTGGTGCTCACCAACGTGGTCCGATTTCTCCGCCCGGACGACGCGATCACCGGCGATGTCCTCGACTCAGCCGCGTTCCTCCTGCCCCTTGGCGCGTTCGAACCTCACTCTGCTCAGGCGTGGTTGAAGCCGGCCTCGGTCATGCACGATCTGGCGTACCGCATCTGCGATTACGCGGGGCTGCGCCGCGATGACGCCATCGATCTGCTTGCTCACACCGAGCGGGTCGCCGACTGGTGTCGTCTCGGCCCGGAGACGGATCTGCGATGGCGACACCCGAAAGTGCCTGAGCTGGAGGCGATCGGACTCGCGGGGGCTGATCCGGTGCGGGTGCTGCGGCAGCGCTGCGAGGCCGCGATCACCGAC…	K14162
Brevibacterium antiquum CNRZ918	1	BN266_00900	french_0005	30345	33918	3573	-1	putative TraA-like conjugal transfer protein	58482edbea064b5890fbe8dc	GTGGTGATGACGATCCGCCCTATGTCCGCCGGCCGCGGCTACGAATACCTCCTGAAAACCGTCGCCGCCGGCGACGGCGACCGCGACCTGGGCACCCCGTTGACCCGCTACTACACCGAGTCCGGCAGCCCACCGGGGACCTGGCTCGGCACCGGCCTGGCATCCCTGGACGACGGCACCGGCACCGGAGTCGATGAGGGGTCGACCGTGACGGAGGAGCACCTGGCCCGGTTGCTCGGGCAGGGCGTGCACCCGGTCACCGGCGCGAAACTCGGCCACGCCTACCCGAGCCTGCGCCCACCGCGTGAGCGGATTGCCGACCGGGTTGCAAAGCTCGCCCCGGACATGCCGGCGGCGCAACGTGAGGTCATGATCCAGGACATCCGCGACGAAGAGGCT…
Brevibacterium antiquum CNRZ918	1	BN266_00905	french_0005	34118	34754	636	-1	hypothetical protein	58482edbea064b5890fbe8dd	ATGTGTCGAGCCAAGTCTGACCCGAACTACTATCGCTGTGAATGGCGTTCTCTGACGACGGGCAAGTTCCTCGACAGGCTCTCAAATGCAGCTGCGGACGTGGGCGTCGCATTCGCAGCGGGCGAGCTCGATCCCAAGAGCACCGAGGACTGGAGTGAGGTCGCAGCACGCGCACGAACATCAGTTGCAGAAGGCGTCGCAGACGTGCTCGGAGCGAGGTCCAAGGCGAGGCGTCGTCGTGAGGCTGCCGCCGGATTCCGACGCTCCGAGAGCCATCTGCTTTGCGCCGTAGCCGCGGCCATCGGCGAAGCATGTGCAACCCTCACCAGCGTTCCAGGGGACATCGCCACCGCCGTCGGCAAAGAGGTTCAGAGCGCCACAGGCAGCGCAATCGCAGGC…
Brevibacterium antiquum CNRZ918	1	BN266_01735	french_0010	50	785	735	-1	ORF55	58482edbea064b5890fbe991	ATGCCAGAACACATCGAGGGACAGTTCGCGTTCGACTTCGACGAGATGGCCCGCGAGGAAGCACGTGCACGCCTGGACGAATGGGGCGGTGCACCGCTGGGGTTCACGCGGGACTACTTCCCGCCCGCGCAGCTTGATGAGGCGTTCGAGCACTGGAAGTTCCTCAACGGCTCCATGGGCTCGTGGAAGCGCAGCCACATGTGGCACCGGGAAGGCTGGAACGGGACCGGCACCGAGTTCGGCGGGCACCGCGGCGAGATCTTCGAAGCCGAGCTCGGCCCCGAGGACGGTCACGAAGGCCCCGGCGGAATGCTGGAGCAGATGATCTGCGAGCCGTGCGAGTGGCACGTGATCGGCGACGAGAACTCCGTCATCGAGCAGTGGCACGATCACGCGGTG…
Brevibacterium antiquum CNRZ918	1	BN266_01750	french_0010	2067	3384	1317	-1	integrase	58482edbea064b5890fbe994	ATGAGCGCGACGACGAAGGAGAAGAAGGCGTCTCCACGAGAGGCCTGGGGGAGCCTGCGCAAGCTCCCATCCGGTCGATGGCAGGCGCGCTACCCCGGCCCGGACGGTGAGACCCATACGGCGCGAACCGAAGACGACAAGGCCCTGACGTTCCAGACCAAGACGGACGCCCGAACCTGGCTGTCTAGTGTGCACACGAAGATCGCGCTCGGGACGTGGGAGATACCAGAGGTCCAGGCCACACGCCGACGTGCCGAAGCCGAGGCAGAAGCTGCTCGCACGATCGGCTTCACCGAGTACGCCGACCGCTGGATCGAGATGATCCGCACCCAGCCAAATCGCAGCGGCAAGATGCGCTCCGAAGGAACAATCCGTTCCTACAAGGGCAAGGTCAACGGC…
Brevibacterium antiquum CNRZ918	1	BN266_02440	french_0013	235	1702	1467	1	putative integral membrane protein	58482edbea064b5890fbea25	ATGTCCACGGAAACCTCCACGGAGTCCGGGACCGCCCTGGTCCCGGCGAAGTTCAGCCGCCTGACCCGTCGGGGCATCCTGCTCGGGCTCTCGGCCTCCCAGCTGGTCACCCTCGGCATCGCCGGGGTGAGCCTGGTCGGCTCCTTCTACGGCGGCGGCGGGGCGCTGTTCCTGCTCACATCACCGATCTGGATCCTCGGTGCGGCGATGACCTGGATCCCCATCAGCGGTCGCCCCGCGGTGGAGTGGGTGCCGATCGCCGGCTGGTGGGTGTGGCGGGCCAGCATGGGCCAGCTGATCTACCGGCGCCGGATCGTCATGCCCCGCCCGGCAGGCACCCTTGCCCTGCCCGGTGATGCCGCCCGACTGCGGGAGTATTCCGATCCCGAGACCGGGGCC…
Brevibacterium antiquum CNRZ918	1	BN266_02445	french_0013	1781	2636	855	1	hypothetical protein	58482edbea064b5890fbea26	ATGCCGACCTACTCCGATCCCGCCCGTGATGCCGCCGAGACCGCCGAGGCCACACGCGGTCTGGCCCACGCCATCCACGCCATCTCCCGTCCCGAGACGATGCCCGGCATCGTTGGGGACCTGCTGGCCACCACCCGGCGCCTGCGCGAAACCCTCGAGGTCCTGGCGCAGACGCACGTGTACTACATCGACCGGGCCAGCACCGATGCCGGGGACTTCAAGACCGGTGAGGCCCATGCCTTCGCCGCCGCCGACGCGCTCGATGAGGCTGTCACCCTCATCGATGACGTCGAAGCTCGCCTGGACCGGGCCGGCACCCACGCCCACCTCATCGCCTGGCAGCCGTCCCCGGAACCGGACCCGCAGTGGCTAAACGTCGTCTTCCTCCAAGGCCAGGAC…
Brevibacterium antiquum CNRZ918	1	BN266_02450	french_0013	2632	4117	1485	1	ATP-binding protein	58482edbea064b5890fbea27	ATGAGCCGGGACGACGACGAGCGACTGCACACCTCCGTGCTGGTCGCCCCTGCCTCTGAACGGCGCCGCTCCCGCAAGGCTCGCCGGGCCGCGGCCACCGCGATCCAGGCCAAGCAGAACCGCCAGCACATGGCCGCAGCGAAGGCACGCGCCGAGGCCGAACGCGCCGAACGCCGTGCCCGGGCGTACCTGCCGGCCTCCGGGGAGCCGGGGCCGGCAGCGCTGCGCACCCCGGGCCGGTTCCGGTTGCCGCGGCATCAGGACACCACCGCCAGCCTGGCCGCGGCCTATCCCTTCTTGGCCGAAGGGGGCCTGGGCAGTGAAGGCGTGTTCATCGGTCAGGACCTCTACTCGGGGGCCAGCTTTGTCTATGACCCGTGGGTGCTCTACGCCCGCGGC…
Brevibacterium antiquum CNRZ918	1	BN266_02455	french_0013	4226	4832	606	-1	Transcriptional regulator ArsR family	58482edbea064b5890fbea28	ATGGATGGGCGTGCATGGACGGTCGGCGAGCTGGCGAACTACTGTGGCCTCGCGCGTTCGACCGCCTCGGAACACGTGGACCTTCTCACCGAGCGGGGGCTCGTCCTCGACATCCGCCAAGGCCGGCATCGTTACGTCCGCCTTGCTGGTAGCGACATCGCCCGCGTCATTGAGAGTCTTGGTATCGTTGCGCAGTCGAAGTTCGACACCGCCCACAGTCTTCGGGCCTCCTCCGCCACCGACCGCGCCCGGGCTGGACGCACGTGCTATAAGCACCTCGCGGGTCGCCTCGGTGTCGCACTCGCAGAACAGCTTCACGATAGAGACTGCCTGAACGAAATGTGGGAGCCCACCGCCGCCGGTCGTGAGCTGCTGGCCGCGTGGGGGCTTCCGCACGCG…
Brevibacterium antiquum CNRZ918	1	BN266_02460	french_0013	5023	5902	879	1	COG0476: Dinucleotide-utilizing enzymes involved in molybdopterin and thiamine biosynthesis family 2	58482edbea064b5890fbea29	ATGAGTACGGGACGTCCGCAGTACCGTGGCACCTACGACGACGACTTCTACTGGGAGAGGGTCAATCGCAACCTCGGCTGGCTCGGCGACACCACCGAGGAGCAGCGCGCCAGGCAGGAAAGACTCCGCGACTCTGTGATCGGGGTCGTTGGCACCGGAGGCATCGGTGGCGCAGTTGCCGCCCGTTTGGTGCGCATGGGAGCACTAAATCTGAAGCTGGCCGATCCCGACCATTTCGATCTCACGAACGTGCAGCGGCAGTACGGTGCCGGACGCGACACGATTGGTCGGAACAAGGCCGAAGTGGTCGCTGAGCAGGTTTACGACCTCACAGGCGATGTCAACATCGATGTGTTTCCTGAAGGTATCACTCCGGACTCGGCCGAGGAATTCATGGAC…
Brevibacterium antiquum CNRZ918	1	BN266_09225	french_0041	336	2310	1974	-1	Transposase B from transposon Tn554	58482edcea064b5890fbefb5	ATGCAGCACGCGAACGTATCCGCACCCAGCTCCATTGATACCCGCCCAGGACTGAGCGGTGAGGATCTGTTGGCCGCCTATCTCACCCGCCTGGCCGCCACGGGCCGGGGAAACGTGGTCTATGAGCGGGCTGCGCGGAACTTCTTCCGCACCTGGCCCAACCCGCAGGCCTGGGCCGCCCAGCCACTGACCGATCGCCTCGCGGCCGACAATCAGACCCGACCGGTCATCACGTTCCTCATGCTCCACCATGGATTCCGACCTGGCTACGATTATCTACTCGAACGTAAACTGTCCTCGGTGTGGCGCGAAATCGATGGCAGCCCCCTAGAAACCGAAATTGATCGCTTCCTCACAGCTTCCGAAAACCTGGGCTTTTCGATGCGAGTGCGCCTGGCA…
Brevibacterium antiquum CNRZ918	1	BN266_12155	french_0046	29	1046	1017	-1	TRANSPOSASE	58482eddea064b5890fbf213	ATGGAGAACACCCTCGTGTTCGACCTCGTCGAGTCTGGCCTGTCACAGCGCCGAGTTCTTGACGTCGTGGGCCTGTCACGGTCTACGTGGCATTACCGGCTCAACCCGCGCCAGACTACGGCTGAGCCGGTGGCGCATCGGGACCGGGCCTATCCGAACCGCATCGATGCTGAAGCGAAACAGCAGATTAAGACACTCATCGAAGCAGGGTGGGCCGATGATCACTCGGTTGATCATGCATTCGCGCGGGCCTGGGACGACGGGATCATGGTCGCGTCCCAACGCACATGGTGGCGCATCGCTGCCGATCTGGAGGATCAGACCAAACGGCCGCAGGTCGCCACGCGCAAGGGCACAAGGCAGCCCCGTGAGATACCGGTGCTGGTGGCGACCAAGCCG…
Brevibacterium antiquum CNRZ918	1	BN266_12565	french_0052	670	5653	4983	-1	putative Helicase	58482eddea064b5890fbf272	GTGCCCTCCGGTGCCCGGGCACGTTACAGCGCCAACCTCGATGCCCTGGGACTGGCCCGCGTCCTGGACGAGGAGCAGCGCCCGGCCACCGAACAGGAACAGGCCGTGCTGGCCGGCTGGTCCAGCTGGGGTGCCCTCCCGGAAGTTTTCGATCCGCGCAACGACCAGTGGGCCGAGCAGCGCGAGGAACTGCGCGCTCTGCTCTCGGAGCAGGAGTGGGACGATGCGGCCCGCACGACCCTCAACGCCCACTACACGTCTCCGTTGGTCGCCCCCGAGCTCTGGCGGGCCATGACCTCGCTGGGCTTCACCGGCGGAGAGGTCCTCGAACCCGGCTCCGGCTCCGGCACATTCATCGGCCTGGCCCCACCGGATGCACGCATGACCGGCGTGGAACTG…
Brevibacterium antiquum CNRZ918	1	BN266_12570	french_0052	5694	6249	555	-1	hypothetical protein	58482eddea064b5890fbf273	ATGAACCACTACGGAACGAAAGCCCTGGAGCACTGGCGTCGCCACGCCCCGCACCGGCTGGAGGAGATCCAGGATCAGGAGACGTTCTTCACCGAGCTGGGCGAGCAGATCGCGACCCAGATCGTGGAACTGACGATCCAGATCGAGACCGGTCGCTTCGCCCCTCTGGCGATGGCGGGCTCTTCGCGAGAGAATGGGAGGTACCTACAGGAGGTCTCGCGCCGAATAACGGCACGACGGATCGCGGAGGAGGTCGTGATGGACGAGCTGGTCTGGATGCAGGATCCGAGCCTGTCGATCGACGAAGCCCGCGAGGAGTGGGAGCAGACCCGGCCAGCAGATTCGAATCTGGTCAGCTGGGCCGAGAGGATTCAGGACTCCCCGGACCTGGCCCCGCCG…
Brevibacterium antiquum CNRZ918	1	BN266_12575	french_0052	6480	8232	1752	-1	COG3505: Type IV secretory pathway VirD4 components	58482eddea064b5890fbf274	ATGGGCGATGAGCTGACGACCTTCGCGATCATCGGGCTCATCGGCCTGTTCGCCGTGGCCCTGGTCCTGCGCCTGGCCGGCTCCCTGACCGCACTGCTGACCGGCAGCCCTGCACCGGAAGCAGGACCGGCCGCCGGGGCGCTGGTCCTCATCCACCCCACCAATCCCGGTGTCGCCTTGCAGGCCGAGGACCTCAACGCGATCGTGTACTGGCTGGTCGCGGCCCTACTGCTCTCCACGGTCGCGGCGGCGATCACCTGGGTGTGGTCGCTGATCCGCCGTCGCACCCAGCAGGTCGAGAAGGACCCGAGGCGTCTGGCCGGGGTCGCCACCCGCCAGGATCTGGCCCAGGCGACCTCGCCGAAGGCTCTGCTGGGCCGGGCTGGGAACCTGCGCCCG…
Brevibacterium antiquum CNRZ918	1	BN266_13595	french_0056	1181	2408	1227	1	hypothetical protein	58482eddea064b5890fbf350	ATGTCGATCCGAGACCACGACAGCAGTCCCCTGAGTTCGCGTCCTTCACCCCCAGGTCACCGGCGCACCAACCCGCAGGTGGGAACATCTCCGACGACGACTCATCATCGAAGCCGCGCTGCCGGGCTCATTCTGGCGCTGGTTCTCAGCGGCTGCAGCTCCGATCGTCCACCTGCCCCCTCGGCTACCTCGTCGTCGCCCACATCAGCTGCCGGCGACACGACCGGCGAGGAACGCGGGTCCACCGCAGACCCCGAGGAGGTGGCGACGAATCTTCAGGCTCCATGGTCGATCGCCTTCTACAAGGGCACGGCGTTGGTCAGTGAGAGAGACTCCGCTCGCATCCTCGAAGTCGACGACGAACGCCCAGCACAGCCCAGAGAGGTCACGACGGTCGCC…
Brevibacterium antiquum CNRZ918	1	BN266_13600	french_0056	2429	3542	1113	-1	Alcohol dehydrogenase	58482eddea064b5890fbf351	GTGAAGATCCGAGGTGCGGTGCTTCGCGAGATGGGGGCCGCCCGCCCCTATGCGAGAACTGAGCCGATGTCGATCGAGGAGCTCGAGCTCGATGGGCCCGGCCCCGGTGAGGTGCTCATCCGACTGAGCGCTGCCGGCGTCTGCCATTCCGACCTGTCCGTCGTCGACGGCAACCGTCCACGGCCCCTGCCGATGCTCCTCGGCCACGAAGGCGCGGGCATCGTCGAAGAACTCGGCGAAGGCGTCACCGACCTCGAGATCGGTGAGCAGGTCGTGACCGTGTTCCTGCCCCGCTGCGGCGAGTGTGCGAACTGCCGCACCGACGGCAAACTCCCGTGCACACCGGGAAGCGCCACGAATGGGGCCGGCACGCTCCCATTCGACGGACACAAGGTCCGA…
Brevibacterium antiquum CNRZ918	1	BN266_13610	french_0056	4094	4700	606	-1	hypothetical protein	58482eddea064b5890fbf353	ATGAGCAGAGAGACACTTGACCTGTGGTTCGACACGGCCTGCCCGTGGGCGTGGATGACGTCGCGCTGGGGTCTGGAAGTCGCCAAGGTCCGTGACATCGATGTGAAGTTCCATGTCATGAGCCTGAACATCCTCAACCGGGACAAAGACATCCCCGCCGACTATCGAGCGCTCATGGATCGTGCTCTGGCACCCATGCGCATCGTCACCGCGGCCATCGCCGAACACGGCGAGGAGATCACCGAGCCCCTATACACGGCGATCGGAACCCGCATCCACCCAGGTGGAGAGAAGGACTTCGACAAGGCCGTCGCCGAGGCGTTGGATGAGGTCGGTCTGCCGGCTGACCTGATGAAATACGGCGAACGCGATGACTACGATGCGGCGCTGCAGGAGTCC…
Brevibacterium antiquum CNRZ918	1	BN266_13615	french_0056	4846	7501	2655	1	Membrane alanine aminopeptidase N	58482eddea064b5890fbf354	GTGCCCCAATACAACCTCACCCGCGAGGAAGCTCGCAGACGTTCATCACTCGTCGACGTCTCGAGCTACGAGAACACCCTGATTCTCACGGGAGTGGGTGAGAGCTTCCGAGTTCACTCCCGCATCCGCTTCACCGCAACGCCGGAGTCCACGACCTTCATCGATGCCATCACAGCCAGCGTCGAACGCATCCGGCTCAACGGACTCGATCTCGAGACCTCCGAGGTCGTCTCCCCCTCACGCATCACTCTGCCTGGCCTTGCCGCAGAGAACGAACTCACCATCGATGCGCACTTCTCCTACATGAACACCGGTGAGGGTCTGCACCGGTTCATCGATCCCATCGACGACGAGGTCTACCTCTACTCACAGTTCGAGGTCCCCGACGCCAGACGTGTC…	K01256
Brevibacterium antiquum CNRZ918	1	BN266_13620	french_0056	7513	8632	1119	1	Potassium efflux system KefA protein / Small-conductance mechanosensitive channel	58482eddea064b5890fbf355	ATGACTTTCGATGCTTTGAATACCGACCTGTTGTCCGCACCCAAGATCGATTGGGACTTTCTCCTCGACGCTCCGTTGAGGATCCTCATCATCATCGTCATCGCCATCGTGCTCAACATGGTGATGCGGTACTTCATCCGACGCTTCTCCACTGCCGTGGCCAAAGGCACCGTCGGCAGTCAGAAGGCTGCGGAGAACGGCAAGTTCTCGGCCACGGTCATGGAATCGCAGCGGACGGGCATCGACCCGGCGACGATCCGCGAACGCCGTGCTCAGCGTGCGAAGACTGTCGGTCGGATGCTCTCGTCTGTGGCGACGATCCTCATCAGCGCCGTCGCAGTCCTCATGATCCTCGACCAGCTCAACTTCAACATCGCACCCATTCTGGCCTCGGCAGGT…	K03442
Brevibacterium antiquum CNRZ918	1	BN266_13630	french_0056	9114	9789	675	-1	hypothetical protein	58482eddea064b5890fbf357	ATGACTGAACTCGAGATCGCCGATCCGCTGGCGATGAAGGATCTGGCCGCGTTCACCTCCTTGGCACACCGGCTCGACCCTGACGGGGCTATGCGCTTGCATGTGTCATCGACCGTGCTCGTCGTCACCGTTGCGCCCCTGTATCCGCATGGCATCGGAGACTCCACACCGTTGGTCCTCGCGATGCGAATGCTGCGCCTGAGCGGACCGGAGATGGACGGCCTCGACGAGGTGGTTCCTCTGACCAACCTCAAGGACCGGTTCGCGCGCGCCGAAAATGCCACACGCCTGCCTGTGCCCCCGAACTCGGTGCTGGTGTCCTGGACCGGCATTGCCCCGCCGAAGGGACAGTGGGCTGTTCGCGACAGGATCTCCGGCAATGAGATTCGGTCCACCGCC…
Brevibacterium antiquum CNRZ918	1	BN266_13635	french_0056	9785	10337	552	-1	hypothetical protein	58482eddea064b5890fbf358	ATGGGACATATGCACAACCGCACCACGAATCCCCATCTGAACGAATTCACACGAGTCCTGTTGGAACTGAGATGGGGAGACATGGATGCCTATGGCCACGTCAACAATGTCACCCAGCTGCGTCTGCTCGAAGAGGCACGCGTCCGCGCTCTGGGCTCACCGACGCACAGCACCGATGCACCCACGACTCCGGGTCAATCGGGAATTGCCGAGACAGTTTCGGGGATCACAATTCCGTCGATCTTCGCCGAGGCTTCGGAGACCACCGAGCTGCTCGTCGCCTCGCATGCGATCGAATATCGTCGTCCCATTCCCTACCGTGCAGGTCCCATTGCCATCGATCTCGTCATCAGCGAGGTCAAACCGGCCTCTGTGACGGTCGGTTACAGCATCGCCGAA…	K07107
Brevibacterium antiquum CNRZ918	1	BN266_13640	french_0056	10422	11331	909	1	Acyl-CoA thioesterase II	58482eddea064b5890fbf359	ATGAGCGATGCAGAACCCACAGCGGCCGAGGCGAATGTCGACACGCTGCGCAAAGTGCTCGAACTCGAAAGTCTGAGCTTCACCTCGGCGTCTCGGGAGAGTGACTACTTCCTCGGACAGAATCAGTACAAACCCGATGGGCGCGTCTACGGCGGTCAGGTCGTGGCGCAATCTGTGGTGGCCGCTGCCGCGACCCTGCCAGATGATCGCCTCATCCACTCACTTCACGGCTACTTCCTGCGCGCTGGGGATGTCAGCGAGCCGATTGAGTTCGGTGTCGAACGACTGCGCGACGGGCGATCTTTCTCCGCTCGACGCGTCCACGCCTATCAGAAGGACGTCCCGATCCTGTCCCTGATCGCCTCCTTCCAGGTTGAGCAGGAGGGTCTCGAACACGCA…	K10805
Brevibacterium antiquum CNRZ918	1	BN266_13650	french_0056	11688	13371	1683	-1	PROBABLE MACROLIDE-TRANSPORT ATP-BINDING PROTEIN ABC TRANSPORTER	58482eddea064b5890fbf35b	ATGGCCGAATTCATTTACACCCTTCACAAGGCGCGTAAAGCGCACGGCGACAAAGTCATCCTCGATGACGTGTCGATGTCCTTCTACCCCGGCGCGAAGATCGGCATGGTCGGTCCCAACGGTGCCGGTAAGTCTACGATCCTCAAGATCATGGCCGGGCTCGAGCAGCCGTCCAATGGCGAGGCTCGGCTCAGCCCCGGGTACACCGTGGGCATTCTCCTGCAGGAGCCGCCCCTGAACGAGGACAAGACCGTCCTCGGCAACGTCCAAGAGGGCGTCGGCGAGATCAAGGCAAAGCTGGACCGCTTCAACGCCATCTCCGAGGAGATGGCCAGCCCTGATGCCGACTTCGATGCCCTGATGGAAGAGATGGGCAAGCTGCAAGAAGCTATCGATGCC…
Brevibacterium antiquum CNRZ918	1	BN266_13660	french_0056	13437	14163	726	-1	hypothetical protein	58482eddea064b5890fbf35d	ATGCGTCTCGTTCCCCTCCTAGGTCTTGGAGCCCTGACCTTGGCTCTCTCGGGTTGTTCGCTGCTGGGATTGGGCGGAGACGATTCGTCGCCCACTCCGGCTCGCACCCCGGCGAAGCCGGTTGCAGAGGTCGACAAGGTCGTTTCCGCACTGAAACCTCTGACCGGCAACGAAGACACGGTTCCGTCGACGAAGAAATTCTTCACAACGATGATCGATGCCGGCTACGATCCGGAGCAGCTTGAGGCTACGATCGATGACTCCCCGCTGGGCAATGACGTGCCCTCGAAGATGTTCGGCGTCAAAACGGACAAAGGGTGCGTGATCGGGGAGATACGAAAGGGAAAGGCCACCGCAGAGCTGATGCCGCCCACCGAATCGACCGGGGCATGCCTGTTC…
Brevibacterium antiquum CNRZ918	1	BN266_13665	french_0056	14306	14906	600	-1	Single-stranded DNA-binding protein	58482eddea064b5890fbf35e	ATGTCCATCATCCCGATCAACCTCAGCGGCACAGTGGCCGCCGATCCGCAGAGCCGCACCCTGCCGTCTGGCAGAGCCTGCGCCTCCTTTCGGTTGGCCGTCAACCATTGGCGCCTCGACAAAGGAACCGGAGAGTATCTCTCCGACACGACCTCGTGGTTCAGCGTCGACTGCTACGGGCCTCTGGCCAGCAACTGCTCGATGAGTCTGCACCAAGGTATGTCCGTCGTCGTACAGGGGACCCTGAAGATTCGGGAATGGTCGACTGATGAGAAGCGGGGAATCGCTCCCACCGTTGTTGCAGAACACATCGGTCCCGATCTTCGCTACGGCACCGCCAACTATCAGAAGTCCAGTAACCCGAATCGGCAAACCGAAGGTCAGCAGCAGACGGCTGCA…	K03111
Brevibacterium antiquum CNRZ918	1	BN266_13670	french_0056	15114	16695	1581	-1	putative ATP-binding membrane protein	58482eddea064b5890fbf35f	GTGAACGATCCTGCACAGTCCGAGATCAGGCGTCGAGCCGAAGGAATTCGGCAGACCCTGTCCCTGGGACCCGACAAATTGAGCGCCGAAGTTCGTACGGACGCGCAGAACCTGCTCAACCGTGCCGAGGATCGGCTCGGCCTGGGCGAGGAGTTCACCGTCGTGGCCTTCGCCGGCTCCACCGGTTCGGGAAAGTCCTCTCTGTTCAATGCCGTTGCCGGACTGGACATCGCCCGGGTCGGCGTTCGTCGGCCCACCACCTCCCGTCCCACTGCATGTGTGTGGGGCGAAGGCGGCAACGACATCCTCAATTGGCTCCATGTGCCCGAGCGCAGCAGGACCTGGCGCGAATCAGCGCTCGACGGTGATGATCAGCGCAAGCTGCACGGCCTGATTCTG…
Brevibacterium antiquum CNRZ918	1	BN266_13675	french_0056	16691	18389	1698	-1	putative ABC transporter	58482eddea064b5890fbf360	ATGACAGACAGTAAGAGTGCCGTGACGCCACCAGTGGGAGGGGCGCTGAGCGATATCGCGAAGCGAGTCTCAGAAACCCGCTTCACCCTGCAGACCGACGACTTCGCCGACGGTCGCGAACTGCACCGACAACTCTCCTCGGAGCTGACGGACTATCTGCTCCCGCGCATCAATCGGACGCAGACGCCCTTCATGATCGCGGTCGGTGGGTCAACTGGCGCAGGCAAGTCCACCTTGGTGAATTCCCTGGTCGGACGCACGGTGACTCCCGCGGGGGTGCGCCGTCCGACGACGGGCAACCCGATCGTGGTGCACAACCCTGCTGACACCAAATTCTTCGAATCGCAGTCCTTTCTCTCTGATCTGCCGCGCAGCACGGATCCGACGACGCAGACCCCC…
Brevibacterium antiquum CNRZ918	1	BN266_13885	french_0058	73	1366	1293	-1	hypothetical protein	58482eddea064b5890fbf38c	ATGGTCGACAAGGACGTTTCCATGAACACCAGAATCGAGATCACGAAGAAATACGCCACCGCGTATGCCAAGGCCGGCAGGCAACAAAAGTCGGCCATCCTCGATGCCGTCACCGACATCACTGGCTGGAACCGCGACCACGCTCGCCAACAGCTCATGCGTCGGACTCGCCAGCCCAAGGGCAGAGCCAACGCCACCGTGGCCGTGATCGATCGACGCAAGACTAAGGCCCGTAAGTACTCCTACGACGCGATCAAGATCCTGCAGTATGTGTGGTCAGTTGCCGGTGGAATCTGCGGCAAATACCTCGCCCAAGCTATGGTCGATCTCCTCAACTCCCTCGAAGCCCACAACCACCTCGTGCCTGGCCAGGGCCGCTACAGCACGAACGTACGCGAC…
Brevibacterium antiquum CNRZ918	1	BN266_13910	french_0059	2983	3790	807	1	TesB-like acyl-CoA thioesterase 5	58482eddea064b5890fbf393	ATGCCCGCACCCGATACCGCCTCATTGCCCGCAGCATTCTACCTGCCACTCGCCGAGAACGAGTTCGACTCCACCGCGGCCACAATGAGCCCCTGGGACGAGTCGATGCAGCACGGCGGACCGCCGGCGGCGTTGCTGGCTCGCGCGGTCGAGCGGGTGCGCCCGGATGCGGGGATGCCGATCGGGCGGATCTCGATCGACATGCTCGGCCCGATCCCGCAGGGGCGTATTCGCACCGAAGCGCAGATCCTGCGGCCGGGCAAACGGATCGAGCTGGTCGAGGCCAAGCTGTGGGCAAACGAGAAGCTCGCGGTCACCGCGACCGCCTGGCGCCTCCGCGCCACCCCCGGCGCAACAACCGAGCAAGCACACACAGTGGAAGCCCCGGCGCTGCCGGAG…
Brevibacterium antiquum CNRZ918	1	BN266_13915	french_0059	3845	4463	618	1	Isochorismatase	58482eddea064b5890fbf394	ATGACCACGGCCTACGAGCCCGAGATCACCGCACTGCTGTGCGTGGACCTGTACAACGACTTCCTGACCGAGGGCGGCAAGCTCTACCCCTGGGTCAAGGACATCGCCGAGGCCAACGACATGCACGAGAACCTGCGCACGCTAGTGGCAGCCGCCCGGGAGAAGGGCATCACCGTCTACCACGTACCGCACCACCGGTGGGAGCCCGGCGACTACCAGGACTGGAAGTACCCCTCGCCCTATCAGCTCGGTGCTGCCGAGCGGCAGGCGTTCGCCAAGGACACCTGGGGCGGGACGTTCCACGACGACTTCCAGGTCCAGGACGGCGATGTCGTGGCCACCGAACACTGGGCCTCCAGCGGCTTCCCGAACACCGACCTGGAGCACAAGCTCAAGCGG…
Brevibacterium antiquum CNRZ918	1	BN266_13920	french_0059	4792	5518	726	-1	hypothetical protein	58482eddea064b5890fbf395	ATGAGGGCCGACTCGGCCTACTACGGCCACGCCGCCGTGCAGGCCGCGATCGCCGGCGGGGCCGAGGTGTCCGTCACCGTCAGGATGGACCCGGCCGTGAAGAAGGCCATCGCCGCCATCGACGACAGTGCCTGGCAGACCATCAAGTACACCGACGCGGTCTACGACGAGGACACCGGCACCTGGATCTCGAGCGCCGAGGTCGCCGAGATCGACTACACCGCCTTCACCTCGAAGAGAAAGGGCCAACGCGTGCCCGGCCGCCTGGTGGTGCGCCGCATTCCCGAGCTCAACCCGAAGGACCTCGACCAGCCGACCCTGTTCGACACCCACCGGTTCCACGCCTTCTTCACCACCAGCGACCTGGACACCGTCACCGCGGACAAGACCCACCGCGCC…
Brevibacterium antiquum CNRZ918	1	BN266_13925	french_0059	6260	7913	1653	-1	hypothetical protein	58482eddea064b5890fbf396	ATGAAGAAAGCCGTGGCCGCTCTGGCCGTCCTGGTTCTGCTGGGCCCGATGTTCGCCCTGGTCGGCGTCGGCCTGATCATGAACCCCGCCGCCTCCGCCCAATGCGTAGCCCCCGGGGAGAACGGTGATGTTGGCGATGTTGGTGATGTCCCCGATGAGCTCACCGCCGAGACCGCCAACGGCGAGACGATCACGCTGGGCAAGAAGCAGCTCGAGCACGCGGCCACGATCATCCAGACCGGCTCGAAGACCGAGGGCGTCACCCGCGACGGGGTCCAGATCGCCCTGATGGCGGCACTGACCGAATCCGTGCTCAAGCAGCTGTCGAACACCAGCTCCTACCCCGAATCCGGCGACATGCCCAACGACGGCAATGGCTCCGACAACGACTCTCTGGGG…
Brevibacterium antiquum CNRZ918	1	BN266_13930	french_0059	7929	8664	735	-1	hypothetical protein	58482eddea064b5890fbf397	ATGACGAGAACTGAAGGCTCCCCGCGGCTGCGCCGCCGCCACATCGCCCTGGCCATCGCCACGATCATCCTGCTCATCTTCACCGGGGTCGGGGTCTACGGCATCATCATCGGCCCCGCCAACCCGGAGCACACCGCACCACAGCCTGACCCTCCAGGCACCGAGACTCCAGCACCGTCCCCGGCTCCGGCGGAGGTCGAGATCCCCGGCATCGCCCCCTCGACCGACCCGGAGGACTTCGCCCGCAGTGCCGCCGAGGCACTGTTCACCTGGGACACCACCAGCGGGTTGATGCCCCTGGACTACACCGCCACCGTGCTGGAGGTCGCCGACCCCAGCGGCGTCGAGCAAGCCGGACTGGCCTCGGACATCGCCGGCTACCTCCCGACCCGGGAGGCC…
Brevibacterium antiquum CNRZ918	1	BN266_13935	french_0059	8708	9728	1020	-1	Chromosome (plasmid) partitioning protein ParB	58482eddea064b5890fbf398	ATGGGACAGGCACAGGGACACATCCAACTCCAGCGGGCCGTTGCCTCGATCATGATCGGGCACCGGCACCGCACCGACCTCGGCGACATCGACGCCCTGGCCGCGTCCATCGCCCAGCTCGGACTGCTGCAGCCGCCGACGATCACCACCGACGGGACCCTGGTCTGTGGCGCTCGCCGGTTGGCGGCCGTGAAGCAGCTGGGCTGGCGGACGGTGGACGTGTGGGTCCGCTCGAGCATCTCGGACCGGCTCGGGCACCTGCTGGCCGAACAGGATGAGAACACCCAGCACAAGGACCTCACCCCCGTCGAGGCCGCCGCACTGTACGGGGAGCTCAAGACGCTCATGGCCGAAGACGCCAGCCGACGTGAGTCCGCAACGCAGTTCAGTTCCGAACAT…	K03497
Brevibacterium antiquum CNRZ918	1	BN266_13940	french_0059	9727	10591	864	-1	hypothetical protein	58482eddea064b5890fbf399	ATGATGACGACCTTGTCCGAACCCGAAGACTTCACGACCAGCGAGGGCCTGCGCGCCCTGCTCGTCCGCCTGCATGAGGCCGGACCCGCCGCCTGGCGCTTGGACCCCGTGGCCGCAGATCTGATGGAACACGCCGCGGCCAAGTACACGCCGTTGGCGCGCAAGCACGGCCTCGACCCCTGGGAGGCCGCCAGTGCGGCGTTCGATGTCATGCGCACCCGCTCGGCGCGCACCGCGAAGGACCCGTGGGGTGTGATCACCCACGCGGTGCGGATCACCTGCATCGCCGAAGAACGCGCCCAAGGACTGCTGTGCTCAGTCCATCAAGCTCGCCGCCCGCACGTGTCCGCCTTCCACGATCCCGAACGGATCTCCGACCGTGAGAACCCCCTGACGGAC…
Brevibacterium antiquum CNRZ918	1	BN266_13945	french_0059	10676	11183	507	-1	hypothetical protein	58482eddea064b5890fbf39a	ATGAGTTCCGATCCCGCCCAGGACGCGCAGAACTGGGACACCAGCTTCACCCCGCCCGATCCCGAACCATGGAATGCGCTGAACACCGCACCCGCTCCGGACCCTGCCGGAGAGCAGAACCCTTGGTGGGACGCCCCTGAACCCGAGGCCGAGCCCGATCACGACGCCGCGAGGATCACCGGCCGTGAGGGCACGGGGGCTCCGGATGCGATCGAGCACGAGAAGACCGCGCAGCGCCGCGCGAGCCTGCACCAGCGCCTCCAGGCCCCGCAGGGCCGCGGCGTCGACTGGGTCAGGCCCACCGACCTGGTCGCCCGGTCCTCCGCCGCGATGGCAGGACGCGGGATCGCCCTGCAGGAACACCTCGCCCGCAAGGTCGACCGCGGCCTGGTCACCGCC…
Brevibacterium antiquum CNRZ918	1	BN266_13950	french_0059	11179	12031	852	-1	Phage excisionase	58482eddea064b5890fbf39b	ATGGGCAGCTCGGAACGGTGGGGATGGTCGGTGATCACGGCCGCATGCGGGACGATCGGGATCGCTCTGGGCGCGTTCTGGCTCTCGTTCACCGCTCTGGCGGATCTGGCGCGACGCTCAGGGATCGCCAGCTCGCAGGCGTGGGTGTGGCCGCTGCTCGTCGATGGGCTCATCGTCGTCGCCACGATCGCTGTGGTGGCTCTCGATGGGCGGGCTGGGGCCTGGTATCCGTGGGGGCTGCTCATCGCTGGGGCTCTGGTCTCGGTGGCGGCGAACGCGATGCACGCTGTGGTGGCCGCGGAGGCAGCCGTGCCGGGATTGCTGGCGTCGGTGATCGCTTCGGTACCGCCGCTGGTGCTGCTGGCATCCACGCATCTGACTGTGGTCCTCATCCGCTCC…
Brevibacterium antiquum CNRZ918	1	BN266_13955	french_0059	12033	12975	942	-1	hypothetical protein	58482eddea064b5890fbf39c	GTGGTCGTGATGGCCGAACACGGTGCCGTCTCCTCGGTCCTCCTCCGCCTCGATGACTCCTGGCCCTTAGGCGCAGCCGCACGCGAGTTCGCCCGGGCTGGAGTACCCGTCTTCCCCTGCGCGCCGAACGGCAAGCGCCCCCTGACCCACGGCGGGTTCCACGATGCCACGACAGATTTCAGCCAGGTCCAGGCGTGGTGGGACCAGATCCCCAACGCCAACATCGGCCTGCCGACCGGCCATCCCAGTGGTGTGGTCGTCGTCGATGTCGACCTGCACGAGAAGGTCAACGGCTACGACGCGATCAACCGCGCCCACGACGCCGGGAAGCTCGGGCACTGGGAAGTCGTCACCCGCACCCCCTCCGGCGGCGCCCACCTGATCTACCCGGCCACACCG…
Brevibacterium antiquum CNRZ918	1	BN266_13960	french_0059	13323	14112	789	-1	Transcriptional regulator AraC family	58482eddea064b5890fbf39d	ATGTATAGCGAGTTCGGCGAGCGCGCTGTGAACGTCGGTGATGTTGTGCTCTTGGGGACGAACGTGCTGTGCGGCATTGATCCCGACCCGCAGATCACGGCCAGCACGATCTACATTGATCCCGAGTACGCGTTGGATCAGCTGTACTGGCAGTACGCCAGCGTCATTCAGAATCGGCTCGATGCGAAGGAGTTCGCCGACACGGTCTACACCGATCCCACACAGATACTGCGTCTCGGCGAAGACCGTGTCGGTTTGCTCATGCCCTGGGTTGACGAGCTCGTGAGACTGAGCATGGATCCGCACGGATTCAACCGTCGTGCTCCAAGGATGCAAGCGCTGTGGTTCTTGGTGCTGGACATCATCGCGCCGTTTGTGCGCTTCTCGCCGGTCCGGACC…
Brevibacterium antiquum CNRZ918	1	BN266_13965	french_0059	14428	15604	1176	-1	UDP-N-acetylglucosamine 2-epimerase	58482eddea064b5890fbf39e	ATGAAGACCATCGGCATCATCCTCGGCACCCGGCCTGAGGCCGTGAAGTTCGCCCCGCTCATCCACGCACTGCGCGAGGATTCCCGCTTCCACCTGCGAGTCATCTCCACCGGCCAGCACCGGGAGATGCTCACGCACACGCTCGGCGAGTTCGGGATCACCCCCGATGTGAACTTCGACATCATGGAACCCGGCCAGTCCCTGACCGATGTCACTCACCGTGCCCTGGCCCGCTTCTCAGCGACTTCGGCGCTTGACGGGCTCGACGTGGCGCTCGTCCATGGCGACACCGCCACCACCCTCGCCGGAGCCCTGGCCGCGTTCCAGGCCGAGGTGCCCATCGTGCACGTCGAGGCAGGCCTGCGCAGCGGCGTGGCGACCTCGCCCTTCCCGGAGGAG…	K01791
Brevibacterium antiquum CNRZ918	1	BN266_13970	french_0059	15652	16915	1263	-1	hypothetical protein	58482eddea064b5890fbf39f	ATGTCTCTCACCTCACCCGCCCCCGCAGCAGCCCCTGAGCGCGCTGCCGCCGACATCACCATCCCGTGGTTCTCCTCGAGCACCGTTACCGACTTCCTGCGCGACGGCTACTGGCTCGAAGCCCCCGACATCACCGGCGATGGCAAGCCCGACCTCGTCGGCCACGGCCTCAAGGCCGGCGAGCTCTACTGGTACGAGAACCCGACCTGGGAGAAGCGACTCCTGCTGGACAAGATCAAGGAGCCCGTCGGCGCGGACTTCGCCAACATCACCGGCGAGCACGGCGACGACTACGTCATCTCCTATCAGCTCTACGGCCCCGGCGGCACCATCCACCACGCCGATCCCGAGGGCGGGAAGATTGACTGGCTGGAGAACCCTGGCCCCGACGCGGTGCGC…
Brevibacterium antiquum CNRZ918	1	BN266_13975	french_0059	16939	18184	1245	-1	hypothetical protein	58482eddea064b5890fbf3a0	TTGTCCATCGACACGAAACCCGATGTGGGCATTATCAGCCCCGTTCGGAATTCCCGCGCGAAATTGGCGTTGCTCGCATTGAGCATCGGCGGCTTCGGGATCGGGTTGACCGAATTCGTTATCGCAGGACTCCTCACTGAGGTCGCCACTGACCTCAGTGTCACGATTCCCGCCGCGGGGCATCTCGTCGGCGCCTATGCCCTGGCGGTGGTGCCCGGCGCTCTCATCCTCACCCCGTTTCTGATGCGCCGGCCCCCGAAGGTCGCCCTCGTGGCGCTGCTGGCCCTGTTCGTCATCGGCAACATTCTCTCGGCCTGGTCGCCCAGCTACGAGGTCATGTTCGCCGGGCGCATCGTGGCCGCGCTCGCCCACGGCGGGTACTTCGGGATCGGCGCGGTT…	K19577
Brevibacterium antiquum CNRZ918	1	BN266_13980	french_0059	18383	19259	876	1	hypothetical protein	58482eddea064b5890fbf3a1	ATGGCAGCAGCATCGCTTCGGCCCACCGGGCACCCTGACCCACCCGCCGTTCACACGTCGACGAACCCGCTTGGAGACTTCCTCCAGGCGCACCGTTCGCGTCTCACGCCGGAAGAGGTCGGGCTGGTGGCCTACGGGATCCGCCGGGTGCCCGGACTGCGGCGCGAAGAGCTCGCCCAACTCTCGGGTATCTCGCCGACGTACTACACACGCCTGGAGCAGGGGCACGCGGCAAACGTGTCCGGGTCGGTCATCAACGCCCTCGCCCGGGCACTTGGCCTCGATGAAGATGCGACGATCTACCTGCACAGCCTCGCCGGCACCATCAAGGAAGCACCGGCGCCGGCAGCGCCTGCGTCACCACCGGCCGGCGACCCGCTCTTCGAGGACGTGGTGGCG…
Brevibacterium antiquum CNRZ918	1	BN266_13985	french_0059	19304	20915	1611	1	Glucose-methanol-choline (GMC) oxidoreductase:NAD binding site	58482eddea064b5890fbf3a2	GTGGCCGAGGCGATGACGTCCACGATCGAGCCGACACCTTCAACCGGTTGGCAGCCGCAGCCGCATCCACCGCTGCGTCCCGGGGCGCTCATCGACCCTGAGACCTGTGGCGGCACGATCACCGCCGACGTCGTGATCATCGGCTCCGGGATGGGCGGTGGTGCCCTCGCCTACGCCCTCGCAGGCTCCGGCCTGTCTGTGCTCATCGTCGAACGCGGCGACTTCCTGCCCAGGGAATCGGAGAACTTCGATGCGGCGCAGATGTTCCTCCACCACCGCTACCAGACCAGCGAAGCCTGGATTGACGGGCACACTGGTACGGAGTTCCAGCCCGGCGTCTACCACTGGGTCGGCGGGAACACGAAGATGTACGGGGCGTGCCTGCCCCGCTTCCGCCGT…
Brevibacterium antiquum CNRZ918	1	BN266_13990	french_0059	20941	21649	708	1	hypothetical protein	58482eddea064b5890fbf3a3	ATGTCCACCACCCGCCGCGCCTCCTTCTCCTTCGATGCCCTCTCCGCGGACACTGTCACCGATGCCGACGAGTTCACGCTCGAGAACCCGAGCATGGTGGTCAACCTCGATGCTGATCCTGCCCGCATCGACATGCCACTGGGCGGGTATATCCCGCCGCTGGCCTCGACGATGCTCGCCGCCGGCACCCAGGTCTCCGGCCGGCTCCTCGCGCTCATCAGCCTGCCCGGGCAGCCGCTGCCCGAGTCCGTGTTCCGCGCCCAGGGGTGGGAAGACTTCTACGGATCCGACCGCGCCGACGCGCAACCGGGGACGGCGGTGCTGCTGAAGTCGACGCAGGACAGCGTCGGCCAGGTCGAGCTCGTGCCCGCGCAGATCCTCGCCGACCCGCACGCCCCG…
Brevibacterium antiquum CNRZ918	1	BN266_13995	french_0059	21817	22684	867	1	putative DNA-binding protein	58482eddea064b5890fbf3a4	ATGCCGTCACACCCGAACGGCCATCCTGGCCGTGCCGCCTTGGGAGCATTCCTCCGCTCCCGCAGGCAATCCTTGACCCCGGAGGACCTCGGTCTCGATCTCACCCAGCCCCGCGAAGGCCCGGGCCTATTTCGTGAAGAGGTCGCTCACCGCGCTGGCATCTCTGTGGCCTACCTAGCCCGGCTTGAGCAGGGCACGGCCACCCAGGCTTCCGTAGCCGCGCTCAACGGTCTCGGGCGCGCGTTGATGCTCGACGCTCACGAGCGCGACGAACTCTTCCGTCTCGCCGAGACGCCTCCTGCCACGCGTCGCCGCGAGCCTCCGCCCGAGCATGTCAGCATCGGCACCGCGCAGCTGCTCACCGCGATGGCCGATGTTCCCGCGATCGTGCTGGGCACT…
Brevibacterium antiquum CNRZ918	1	BN266_14000	french_0059	23180	24512	1332	-1	Probable transmembrane transport protein	58482eddea064b5890fbf3a6	TTGACGGCGAACTTCACCCTCGCGGTGGATTTCTCCATCCTGAATGTCGCGCTGCCGCACATCGGCCGCGAACTCGGGTTCCCCACCGAGAGCCTGCAATGGATCGTGACCTCCTTCGCATTGTGCGCGGCTGGTTTCACACTGCTCTTCGGCCGCGTCGCCGACCTGTTCGGGCGGAAGAAGCTCTTCCTCATCGGCATCGTGCTCCTCGGCGTCGCCTCCCTGGCCGGTGGCCTCGCCCAGGACCCGACCCTGCTCATCATCGCTCGCGTCGGCCAGGGCATCGCGACCGCGATGGTCACTCCTGCCGCACTGTCCCTGATGACCACGACCTTCCCCGAAGGACCGGCCCGTAGCCGCGTACTCGGCCTCAACGGCGCGCTCATGGCTGCAGGCTTC…
Brevibacterium antiquum CNRZ918	1	BN266_14005	french_0059	24700	25585	885	1	putative DNA-binding protein	58482eddea064b5890fbf3a7	ATGGAGGACTACACAACAGTGACCCGCGCCACAGCCGCCTACGAGGCCCGCGCCGACGACCTCGGCGAATTCCTGCGCTCGCGCAGGGATCGGCTCAGCCCCGAAGACGTCGGCGTCCCCTCCTACGGGCGCCGCCGCGTGGCGGGCCTGCGGCGTGAGGAACTCGCCCAGCTCGCCGGTGTCTCCGTGACCTACTACACCCGACTTGAGCAGGGTCAGTCTCAGAATGCCTCCGACTCGGTCATCGAGTCTCTGGCTCGCGCTCTGCGCCTGGATGCCGATGAGACCGCGCACCTGTTCGCCCTGGCCCGGCCGGGGATGGTCAAACGGCCTGCCGTGGACCGGCCCGAACGGCCCAACGCCGGTGCCCGTCAGCTCCTCCACGCGATGGAATCGGTG…
Brevibacterium antiquum CNRZ918	1	BN266_14010	french_0059	25712	26663	951	-1	monooxygenase	58482eddea064b5890fbf3a8	ATGACTGGCTCCACCACACCCGTGACGCTGTCGGTCCTCGACCAGTCACCCATCACCGACCATCTCGACCGCACCGAGGCGCTGCAGGAAAGCCTGCGCCTGGCCGAACGGGCCGAACGCGAGGGGTACCGGCGGATCTGGTACGCCGAGCACCACCACTCGATGTCCTTCGCCAGCCCAGCCCCGGAGACCATGACTGCCCTGGCCCTCGAACGCACCACGCGGATCCGGGTGGGCACCGGTGGGATCCTGCTCCCGCTGTACACGCCTCAGAAAGTCGCCGAGACGATGGGGCTGCTCCAGCGGGTCCATGGCGATCGTGTCGATATCGGTATCGGCCGCGCTGCGCTGCACACGAATGACTTCCCCCACAAGGTCGAGACCCTGCTGAGTCGACTC…
Brevibacterium antiquum CNRZ918	1	BN266_14015	french_0059	26659	27190	531	-1	hypothetical protein	58482eddea064b5890fbf3a9	ATGACCACCGCGACCACGACCCCTGCACCGCTGGAGGCCCTCGTCCGCCACTTCGCCGATCTGCGCGACGGGGACCACTTCGGCGAGGTCACCCGCCAAGGCAAGGAGGCCGCGTTCCAGCGCGCCGTCGAACTCCTCGACACCCCAGCCCGGCAGGTGCTGGAGGAGTTCAACTCCTACCTCCTGCTCGACACCGGACAGATCGACTTCACTGGCCTGCACCGCGATGCCCATGGCGGGCTCCTGGCCTCCTGGCTGCTGAGCTGGCCGGAGCAGAAAGCCGCAGGCCTCGTCCCGATCAGCATCATCGCCATCTACGGCGCCGGATTCCACCACCCGCACCTACGCGGGGCGACCGTGGCCCAATGGCCCCTGAACGTCGCCACCGCCGATCACGCC…
Brevibacterium antiquum CNRZ918	1	BN266_14020	french_0059	27186	27933	747	-1	COG0657: Esterase/lipase	58482eddea064b5890fbf3aa	ATGCACCGGCAGACCGAGAACGGGGCTGCCGGGTGGATCATCTGGGCCCACGGCGGGTCCTGGCACCAAGGGTCGGCCGCCGACTGGCAGCACGCCACCGGTCTGCTCGCGAGCCTGTCAGGCCGGAACGTGCTCTCACTCGACTACCGGCTCGCGCCGACGCATCGGCACCCCGCGGCCGTGCTCGACATGCTCACCGCCATCGGCTGGGTGCGCGAGACCAGCCCGGACAGTTCGATCATCGTCGGCGGCGACAGCGCCGGAGGCACCCTCGCCGCTGTCGCGGCGATCGCCGCCCGCGACCGGGGCGAGAGCCTGCAGGCGCAGATCCTGGCTTACCCGCCAATCGATCCCGAGTGCCGCGCCGTCTCCTACCATGCCGACCCCGGTTCATTCCCG…	K01066
Brevibacterium antiquum CNRZ918	1	BN266_14025	french_0059	28028	28811	783	-1	3-oxoacyl-[acyl-carrier protein] reductase	58482eddea064b5890fbf3ab	ATGGACCTCAACCTCACCGGCAACGTCGTCATCGTCACCGGAGGCACCAGCGGCATCGGCCTGGCCACCACCGAACTGCTCACCCGGGAGGGCGCGCACGTGGTCGTCCTCGCCCGCGGCACCACCGACGTGGCCCTGCCCAAGGGGGCGGAGCTGTTCAAGACCGATCTGACCGACCCCCACGCTGCCACTGAAGCTGTGGAAGCTGTCCGGGCACGCCATGGGCGTTTGGACGGGCTGGTCAACAATGCGGCCATCCTCATTTCCCAGCCTTCGTTCGCCGACATCGACGACGAGCAGTGGCACCGGATCTTCGAGCTGAACCTCCACGCCGGGATTCGACTCATCAGGGCCGCGCTACCGTTGCTGGCCGCAGCGGAGGGTGGCGGATCGATCGTG…
Brevibacterium antiquum CNRZ918	1	BN266_14030	french_0059	28826	30059	1233	-1	putative O-acyltransferase	58482eddea064b5890fbf3ac	ATGACCACTCCTGTCCCCGCGACGACGACGCGACCACCGAAGCTGCCGTCCCTGACCGGGCTGCGATTCTTCGCCGCCCTGCTGGTGTTCGGATTCCACATCACCCTCTCCTCCTCACCGATCCCGCCGAACGACCCGATCAACCTGTTCGCCGACCCCGAGGTCGCGCGCGTGGCCGAGCAGATCTTCCTGGTCACCGGGTACGTGGGAGTGTCGTTCTTCTTCGTCCTCTCCGGGTTCCTCCTGGCGTGGGCGGCGAAGCCCGATGAGAAGCTCACCGCGTTCTGGCGTCGCCGGGTGATGAAGATCTTCCCGAACCACATCGTCATGTGGGTGCTGTCGATGGTGCTGTTCGCCGCCGCGATCACCCCGGCACACGCCTCGGTGCTTAACTTCTTC…
Brevibacterium antiquum CNRZ918	1	BN266_14035	french_0059	30073	31774	1701	-1	Putative oxidoreductase	58482eddea064b5890fbf3ad	ATGAACACCACCACGATTGAAACGCCACCGTCGAAAGGCCGCGTCGGACGGCGCTCATTTCTGCTGGGCTCGGCGGGAGCAGCTGCCGCCGGGGCGATGATGCCCTTCAACGCCGCGCCCAGTTTCGCCGATGCCAGCGTCTCCAGCGCCCTACCCAGTGGTGGCGGTGTCATTGGCCCCAAGGATCCGCGTTACTTGGACCTCAGGACGGGAAACAATGTGCGCTTCGTAGCGAAGCCTGACTACGTGCACATGATCAACAGTGCCAAGGACGCCAAGAAGGCGGTGCAGTCAGCGGTCGATGCCGGGAAGAAGGTATCCGTTCGCAGTGGAGGGCACTGCTTCGCCGATTTCGTCTGCAACTCTGACATCGAAGTCATTCTCGACGTGTCGACGATG…
Brevibacterium antiquum CNRZ918	1	BN266_15225	french_0074	609	1371	762	-1	hypothetical protein	58482eddea064b5890fbf4bb	ATGGCTAACACGTTCGATTCCCTGATCGAAGCCGGGGCCTGCGCCGACGTGTCTGGGTGGGATTTCTCCTGGCTGGAGGGGCGGGCCGCTGAGGAGCGCCCGCCCTGGGGCTATGCACGGCAGCTTGCCGACCGGCTCAGCAGGGCCACGGCGTCGCTGGATATCCAGACCGGCGGCGGTGAAGTCCTCGCCGAAGCCAAGACGTTTCCCACCACTGCGGTCGCGACCGAATCCTGGTTGCCAAACGTCGCGAAAGCCACCCGCCTGCTACATCCCCGCGGTGTGGTCGTGGTGGCCGATCCGGACGAACCCCCGCTACCGTTCGCAGACGAGGCGTTCGACCTGGTCACCAGCAGGCACCCGGCCACGATCTGGTGGGAGGAGATCGCCCAGATCCTC…
Brevibacterium antiquum CNRZ918	1	BN266_15230	french_0074	1453	2548	1095	-1	DNA alkylation repair enzyme	58482eddea064b5890fbf4bc	TTGGCGGATTTCAAGGAGGAACTCTCTCCGGGCCTCATCGAACGTCTCGGCAGTGAACTCGCTGGTGCTTCGGCATCATTCGAGCGGGCAACGTTCGAACAGCTCGCGATTGATGGTCTCGATGAGCGTGAGCTGATGGCCCGGCTGGACTGGATCGCCTGCGCTCTCACGAAAACAACGCCGCCCTCGCCCGAGGACGCCGACCGGATGATTCGCGGCGCCCTCGATCGCGGAGGTCTCCAGGACTGGGCATCGATGGCCGTTAACGCCTACATTGCTCAGACGATGCTGGACCGACCCGATATCGGTCTGCCGCTACTGGCGGCCTTGACCTCCCGGTACACGGCGGAGTTCGCGATCCGCCCGTTCATCGACGCCCAGTACGAAACCACGATGGGG…
Brevibacterium antiquum CNRZ918	1	BN266_15235	french_0074	3007	4381	1374	-1	hypothetical protein	58482eddea064b5890fbf4bd	GTGAACACACAGCGAAAAACCGGTGCGCTGGTGGCCGTCGTGCTGGGATTCTTCATCGTCATGCTCGACACCACCATCGTCAACGTGGCACTGCCCGACATGGCGGCGTCCTTGAACACGCAGGTGGCGACCCTGCAATGGGTCGTCGACTCCTACACGCTCGTGTTCGCCGCACTGTTGCTGACTGCCGGTGCCGCCTGCGACCGGATTGGTGCGCGCAAGGTCTACATCCTCGGGCTCGTCGCCTTCGGAGTTCTCTCCATTGCCTGCGCTCTGGCGCCGACCGGGCCAGCGCTCATCATCGCCCGGGCCCTCCAAGGCATCGGCGCTGCGGCAGTCGTACCCGGATCGCTCGCGCTGCTGGCAACGGTCTACCCGGACCCGGCCGAACGCTCGAAG…	K08166
Brevibacterium antiquum CNRZ918	1	BN266_16095	french_0079	361	1030	669	-1	Transcriptional regulator AsnC family	58482eddea064b5890fbf575	GTGTCGATGACGGAGTCAACATTTGTCGCCGACATCGCCGGTCACTATTCGATCGACGCTGAGGTGAGAGTGGGTCCAGATCCTCACCTACGACGAACCCTCGACGCCATTCTGCAACTGCCAGGCGTCAGCGACATCCGCACCACACTCTATGAATCTATTGAAATCAATCGATTCTCCCCGTTCCACACAGCCAAAGCCCCGCTGACGCTCGACGAGGCCGACCGGTCCCTCATTATGCATCTGCAAAGGGACGCCCGATCGTCCTATCGAGAGCTCGGCGAGGCGTCGGGTTTGTCGCCGAGCGGCGCGCGACTACGATTCGAACGGCTTGTTAGAAGCGGAGCGATCAAGGTCGTCGGCATACCAGTTCGCATCGGACAGCCCGACACTCCCACT…
Brevibacterium antiquum CNRZ918	1	BN266_16100	french_0079	2360	3812	1452	1	Cytosine/purine/uracil/thiamine/allantoin permease family protein	58482eddea064b5890fbf576	ATGTCATCACAACTATCCCCGGACAACCCCGACTCGATGATTGAGTCAAGATCGATCGACGTAGTGCCCCTGGCAGAACGCCACGGAAAAGTCTGGCACCAAGGCCCGTTCTGGTTCGCCGGCAACTTCGTCTTGACAACTCTTGTGGTGGGCTTCACTGGCCCCACAATGGGGCTGAGTCTGGGATTCTCCATCCTGGCGATCGTGCTCGGGGTCGGATTCGGAACCTTCTTCATGGCGTTCCATGCCAACCAAGGGCCGACGATGGGACTGGCGCAGATGATCCAATCCCGCGCACAATTTGGCAGCCGCGGAGTGCTGCTGCCGTTCATTGCGACAGTCTTCGTCTACGTCGGATTCCTCGTCTTCGACACAATTCTCGTCACCCAGGGAATCGGA…
Brevibacterium antiquum CNRZ918	1	BN266_16110	french_0079	4967	6410	1443	1	hypothetical protein	58482eddea064b5890fbf578	ATGACACCACGCCGGATGACCGAGGCGGCTCCATTCACAGCCGAAGGCAGCCCACGTCAGAAAGTCCGTTTCCACATGACATCCGATCCCCAGCGCCGTCGACCGTTCCGGTCCCGGCCGAGTCGCCGTCAGCTCCTCACCGGTGCCCTGAGCGGTGCAGGCGTGCTCGGTGCCGGCTTCGTGACATCGTCGGGAACCGACATCCTCGCCGAGGTGGGCCGGAATGATCATCTTCGCTCGGTCACGGTCGCCTTCACATCGGGGACCACTCGGGAGGGTGTTGGGGCAGAAGCGGGACTGGAACTGCAGCCAGATTCCCGTGTCATGCCCGGAATCGAGGATCCGGGGCCGAAGCAGCGGCAGAGGGAATTCCTCGATCGGTGCTCGTCGTGGCTATCG…
Brevibacterium antiquum CNRZ918	1	BN266_16115	french_0079	6670	8041	1371	1	Cell division trigger factor	58482eddea064b5890fbf579	GTGAAGAGCTCCGTCGAGCAACTCGACCCCACGCGGGTCAAGATCAGCGTGGATGTCCCATACGCCGAACTCAAGCCGAGCATCGACGAGGCATACAAGACCATCGGTGGCCAGGTGACCATCCCCGGCTTCCGCCAGGGCAAGGTCCCTGCTCGAATCATCGATCAGCGCGTTGGTCGACCTGCAGTGATCCAGGAGGCCGTCAACAACGGTCTTGACGGGTTCTACCGCGAAGCCGTCGAAGAGAACGATCTCAAGCCGCTGGGCCAGCCCGAGGTTGAGATCTCAGAGGTCCCCGGCCTCGACGGCACCGAAGACGGCGACCTGACCTTCACGGTCGAGGTTGACGTTCGCCCGGCGATCGAACTGCCTGCCTACGACACCATCAGCGTCGAGGTC…	K03545
Brevibacterium iodinum ATCC 49514	1	BN246_08510	french_0724	20	905	885	-1	Transposase	58482eebea064b5890fc29ef	ATGATGTACCCGCTGGTCCTTGACCTTGCTGCCACCGGGGTGCCGGTGGCAGTGACCTGTCGGGTGCTCGGCTTTACCAAGCAGGGGTTCTACAAGTGGTGCGCTCATCCGGTCTCAGCTCGGGACTGGGACGAGGCACATCTGATCAATGCCGCCTACGACGTTCATACGGACGATCCTGAGTTCGGGCACCGGTTCATCGCCGATGAACTCCACGCCGCGGGTCTGCAGACGTCAGAGCGTCGTGTGTGGCGATTGTGCTCGCAGCAGCAGTTGTTCTCGCACACGATCAAACGAGCCCGGAAACACGGCAAGAAGCCCGGCCCGCCAGTGTGTGACGACCTCGTCGAACGCGACTTCACTGCCAAGGCAATCAACGAGTTGTGGCTGACCGACGTT…
Brevibacterium linens 341_13	1	Ga0115324_101155	Ga0115324_101	157883	159254	1371	-1	trigger factor	58482e5dea064b5890fa17d1	GTGAAGAGCTCCGTCGAGCAACTCGACCCCACGCGGGTCAAGATCAGCGTGGATGTCCCATACGCCGAACTCAAGCCGAGCATCGACGAGGCATACAAGACCATCGGTGGCCAGGTGACCATCCCCGGCTTCCGCCAGGGCAAGGTCCCTGCTCGAATCATCGATCAGCGCGTTGGTCGACCTGCAGTGATCCAGGAGGCCGTCAACAACGGTCTTGACGGGTTCTACCGCGAAGCCGTCGAAGAGAACGATCTCAAGCCGCTGGGCCAGCCCGAGGTTGAGATCTCAGAGGTCCCCGGCCTCGACGGCACCGAAGACGGCGACCTGACCTTCACGGTCGAGGTTGACGTTCGCCCGGCGATCGAACTGCCTGCCTACGACACCATCAGCGTCGAGGTC…	K03545
Brevibacterium linens 341_13	1	Ga0115324_101168	Ga0115324_101	167428	168655	1227	1	Glucose/arabinose dehydrogenase beta-propeller fold	58482e5dea064b5890fa17eb	ATGTCGATCCGAGACCACGACAGCAGTCCCCTGAGTTCGCGTCCTTCACCCCCAGCTCTACGGCGCACCAACCCGCAGGTGGGAACATCTCCGACGACGACTCATCATCGAAGCCGCGCTGCCGGGCTCATTCTGGCGCTGGTTCTCAGCGGCTGCAGCTCCGATCGTCCACCTGCCCCCTCGGCTACCTCGTCGTCGCCCACATCAGCTGCCGGCGACACGACCGGCGAGGAACGCGGGTCCACCGCAGACCCCGAGGAGGTGGCGACGAATCTTCAGGCTCCATGGTCGATCGCCTTCTACAAGGGCACGGCGTTGGTCAGTGAGAGAGACTCCGCTCGCATCCTCGAAGTCGACGACGAACGCCCAGCACAGCCCAGAGAGGTCACGACGGTCGCC…
Brevibacterium linens 341_13	1	Ga0115324_101169	Ga0115324_101	168676	169789	1113	-1	alcohol dehydrogenase	58482e5dea064b5890fa17ed	GTGAAGATCCGAGGTGCGGTGCTTCGCGAGATGGGGGCCGCCCGCCCCTATGCGAGAACTGAGCCGATGTCGATCGAGGAGCTCGAGCTCGATGGGCCCGGCCCCGGTGAGGTGCTCATCCGACTGAGCGCTGCCGGCGTCTGCCATTCCGACCTGTCCGTCGTCGACGGCAACCGTCCACGGCCCCTGCCGATGCTCCTCGGCCACGAAGGCGCGGGCATCGTCGAAGAACTCGGCGAAGGCGTCACCGACCTCGAGATCGGTGAGCAGGTCGTGACCGTGTTCCTGCCCCGCTGCGGCGAGTGTGCGAACTGCCGCACCGACGGCAAACTCCCGTGCACACCGGGAAGCGCCACGAATGGGGCCGGCACGCTCCCATTCGACGGACACAAGGTCCGA…
Brevibacterium linens 341_13	1	Ga0115324_101171	Ga0115324_101	170341	170947	606	-1	DSBA-like thioredoxin domain-containing protein	58482e5dea064b5890fa17f1	ATGAGCAGAGAGACACTTGACCTGTGGTTCGACACGGCCTGCCCGTGGGCGTGGATGACGTCGCGCTGGGGTCTGGAAGTCGCCAAGGTCCGTGACATCGATGTGAAGTTCCATGTCATGAGCCTGAACATCCTCAACCGGGACAAAGACATCCCCGCCGACTATCGAGCGCTCATGGATCGTGCTCTGGCACCCATGCGCATCGTCACCGCGGCCATCGCCGAACACGGCGAGGAGATCACCGAGCCCCTATACACGGCGATCGGAACCCGCATCCACCCAGGTGGAGAGAAGGACTTCGACAAGGCCGTCGCCGAGGCGTTGGATGAGGTCGGTCTGCCGGCTGACCTGATGAAATACGGCGAACGCGATGACTACGATGCGGCGCTGCAGGAGTCC…
Brevibacterium linens 341_13	1	Ga0115324_101172	Ga0115324_101	171093	173748	2655	1	aminopeptidase N	58482e5dea064b5890fa17f3	GTGCCCCAATACAACCTCACCCGCGAGGAAGCTCGCAGACGTTCATCACTCGTCGACGTCTCGAGCTACGAGAACACCCTGATTCTCACGGGAGTGGGTGAGAGCTTCCGAGTTCGCTCCCGCATCCGCTTCACCGCAACGCCGGAGTCCACGACCTTCATCGATGCCATCACAGCCAGCGTCGAACGCATCCGGCTCAACGGACTCGATCTCGAGACCTCCGAGGTCGTCTCCCCCTCACGCATCACTCTGCCTGGCCTTGCCGCAGAGAACGAACTCACCATCGATGCGCACTTCTCCTACATGAACACCGGTGAGGGTCTGCACCGGTTCATCGATCCCATCGACGACGAGGTCTACCTCTACTCACAGTTCGAGGTCCCCGACGCCAGACGTGTC…	K01256
Brevibacterium linens 341_13	1	Ga0115324_101173	Ga0115324_101	173760	174879	1119	1	small conductance mechanosensitive channel	58482e5dea064b5890fa17f5	ATGACTTTCGATGCTTTGAATACCGACCTGTTGTCCGCACCCAAGATCGATTGGGACTTTCTCCTCGACGCTCCGTTGAGGATCCTCATCATCATCGTCATCGCCATCGTGCTCAACATGGTGATGCGGTACTTCATCCGACGCTTCTCCACTGCCGTGGCCAAAGGCACCGTCGGCAGTCAGAAGGCTGCGGAGAACGGCAAGTTCTCGGCCACGGTCATGGAATCGCAGCGGACGGGCATCGACCCGGCGACGATCCGCGAACGCCGTGCTCAGCGTGCGAAGACTGTCGGTCGGATGCTCTCGTCTGTGGCGACGATCCTCATCAGCGCCGTCGCAGTCCTCATGATCCTCGACCAGCTCAACTTCAACATCGCACCCATTCTGGCCTCGGCAGGT…	K03442
Brevibacterium linens 341_13	1	Ga0115324_101175	Ga0115324_101	175361	176036	675	-1	hypothetical protein	58482e5dea064b5890fa17f9	ATGACTGAACTCGAGATCGCCGATCCGCTGGCGATGAAGGATCTGGCCGCGTTCACCTCCTTGGCACACCGGCTCGACCCTGACGGGGCTATGCGCTTGCATGTGTCATCGACCGTGCTCGTCGTCACCGTTGCGCCCCTGTATCCGCATGGCATCGGAGACTCCACACCGTTGGTCCTCGCGATGCGAATGCTGCGCCTGAGCGGACCGGAGATGGACGGCCTCGACGAGGTGGTTCCCCTGACCAACCTCAAGGACCGGTTCGCGCGCGCCGAAAATGCCACACGCCTGCCTGTGCCCCCGAACTCGGTGCTGGTGTCCTGGACCGGCATTGCCCCGCCGAAGGGACAGTGGGCTGTTCGCGACAGGATCTCCGGCAATGAGATTCGGTCCACCGCC…
Brevibacterium linens 341_13	1	Ga0115324_101176	Ga0115324_101	176032	176584	552	-1	acyl-CoA thioester hydrolase	58482e5dea064b5890fa17fb	ATGGGACATATGCACAACCGCACCACGAATCCCCATCTGAACGAATTCACACGAGTCCTGTTGGAACTGAGATGGGGAGACATGGATGCCTATGGCCACGTCAACAATGTCACCCAGCTGCGTCTGCTCGAAGAGGCACGCGTCCGCGCTCTGGGCTCACCGACGCACAGCACCGATGCACCCACGACTCCGGGTCAATCGGGAATTGCCGAGACAGTTTCGGGGATCACAATTCCGTCGATCTTCGCCGAGGCTTCGGAGACCACCGAGCTGCTCGTCGCCTCGCATGCGATCGAATATCGTCGTCCCATTCCCTACCGTGCAGGTCCCATTGCCATCGATCTCGTCATCAGCGAGGTCAAACCGGCCTCTGTGACGGTCGGTTACAGCATCGCCGAA…	K07107
Brevibacterium linens 341_13	1	Ga0115324_101177	Ga0115324_101	176669	177578	909	1	acyl-CoA thioesterase-2	58482e5dea064b5890fa17fd	ATGAGCGATGCAGAACCCACAGCGGCCGAGGCGAATGTCGACACGCTGCGCAAAGTGCTCGAACTCGAAAGTCTGAGCTTCACCTCGGCGTCTCGGGAGAGTGACTACTTCCTCGGACAGAATCAGTACAAACCCGATGGGCGCGTCTACGGCGGTCAGGTCGTGGCGCAATCTGTGGTGGCCGCTGCCGCGACCATGCCAGATGATCGCCTCATCCACTCACTTCACGGCTACTTCCTGCGCGCTGGGGATGTCAGCGAGCCGATTGAGTTCGGTGTCGAACGACTGCGCGACGGGCGATCTTTCTCCGCTCGACGCGTCCACGCCTATCAGAAGGACGTCCCGATCCTGTCCCTGATCGCCTCTTTCCAGGTTGAGCAGGAGGGTCTCGAACACGCA…	K10805
Brevibacterium linens 341_13	1	Ga0115324_101179	Ga0115324_101	177928	179611	1683	-1	ATP-binding cassette protein ChvD family	58482e5dea064b5890fa1801	ATGGCCGAATTCATTTACACCCTTCACAAGGCGCGTAAAGCGCACGGCGACAAAGTCATCCTCGATGACGTGTCGATGTCCTTCTACCCCGGCGCGAAGATCGGCATGGTCGGTCCCAACGGTGCCGGTAAGTCTACGATCCTCAAGATCATGGCCGGGCTCGAGCAGCCGTCCAATGGCGAGGCTCGGCTCAGCCCCGGGTACACCGTGGGCATTCTCCTGCAGGAGCCGCCCCTGAACGAGGACAAGACCGTCCTCGGCAACGTCCAAGAGGGCGTCGGCGAGATCAAGGCAAAGCTGGACCGCTTCAACGCCATCTCCGAGGAGATGGCCAGCCCTGATGCCGACTTCGATGCCCTGATGGAAGAGATGGGCAAGCTGCAAGAAGCTATCGATGCC…
Brevibacterium linens 341_13	1	Ga0115324_101180	Ga0115324_101	179677	180403	726	-1	hypothetical protein	58482e5dea064b5890fa1803	ATGCGTCTCGTTCCCCTCCTAGGTCTTGGAGCCCTGACCTTGGCTCTCTCGGGTTGTTCGCTGCTGGGATTGGGCGGAGATGATTCGTCGCCCACTCCGGCTCGCACCCCGGCGAAGCCGGTTGCAGAGGTCGACAAGGTCGTTTCCGCACTGAAACCTCTGACCGGCAACGAAGACACGGTTCCGTCGACGAAGAAATTCTTCACAACGATGATCGATGCCGGCTACGATCCGGAGCAGCTTGAGGCTACGATCGATGACTCCCCGCTGGGCAATGACGTGCCCTCGAAGATGTTCGGCGTCAAAACGGACAAAGGGTGCGTGATCGGTGAGATACGAAAGGGAAAGGCCACCGCAGAGCTGATGCCGCCCACCGAATCGACCGGGGCATGCCTGTTC…
Brevibacterium linens 341_13	1	Ga0115324_101181	Ga0115324_101	180546	181146	600	-1	single-strand DNA-binding protein	58482e5dea064b5890fa1805	ATGTCCATCATCCCGATCAACCTCAGCGGCACAGTGGCCGCCGATCCGCAGAGCCGCACCCTGCCGTCTGGCAGAGCCTGCGCCTCCTTTCGGTTGGCCGTCAACCATTGGCGCCTCGACAAAGGAACCGGAGAGTATCTCTCCGACACGACCTCGTGGTTCAGCGTCGACTGCTACGGGCCTCTGGCCAGCAACTGCTCGATGAGTCTGCACCAAGGTATGTCCGTCGTCGTACAGGGGACCCTGAAGATTCGGGAATGGTCGACTGATGAGAAGCGGGGAATCGCTCCCACCGTTGTTGCAGAACACATCGGTCCCGATCTTCGCTACGGCACCGCCAACTATCAGAAGTCCAGTAACCCGAATCGGCAAACCGAAGGTCAGCAGCAGACGGCTGCA…	K03111
Brevibacterium linens 341_13	1	Ga0115324_101182	Ga0115324_101	181354	182935	1581	-1	50S ribosome-binding GTPase	58482e5dea064b5890fa1807	GTGAACGATCCTGCACAGTCCGAGATCAGGCGTCGAGCCGAAGGAATTCGGCAGACCCTGTCCCTGGGACCCGACAAATTGAGCGCCGAAGTTCGTACGGACGCGCAGAACCTGCTCAACCGTGCCGAGGATCGGCTCGGCCTGGGCGAGGAGTTCACCGTCGTGGCCTTCGCCGGCTCCACCGGTTCGGGAAAGTCCTCTCTGTTCAATGCCGTTGCCGGACTGGACATCGCCCGGGTCGGCGTTCGTCGGCCCACCACCTCCCGTCCCACTGCATGTGTGTGGGGCGAAGGCGGCAACGACATCCTCAATTGGCTCCATGTGCCCGAGCGCAGCAGGACCTGGCGCGAATCAGCGCTCGACGGTGATGATCAGCGCAAGCTGCACGGCCTGATTCTG…
Brevibacterium linens 341_13	1	Ga0115324_101183	Ga0115324_101	182931	184629	1698	-1	Dynamin family protein	58482e5dea064b5890fa1809	ATGACAGACAGTAAGAGTGCCGTGACGCCACCAGTGGGAGGGGCGCTGAGCGATATCGCGAAGCGAGTCTCAGAAACCCGCTTCACCCTGCAGACCGACGACTTCGCCGACGGTCGCGAACTGCACCGACAGCTCTCCTCGGAGCTGACGGACTATCTGCTCCCGCGCATCAATCGGACGCAGACGCCCTTCATGATCGCGGTCGGTGGGTCAACTGGCGCAGGCAAGTCCACCTTGGTGAATTCCCTGGTCGGACGCACGGTGACTCCCGCGGGGGTGCGCCGTCCGACGACGGGCAACCCGATCGTGGTGCACAACCCTGCTGACACCAAATTCTTCGAATCGCAGTCCTTTCTCTCTGATCTGCCGCGCAGCACGGATCCGACGACGCAGACCCCC…
Brevibacterium linens 341_13	1	Ga0115324_1302	Ga0115324_130	808	2782	1974	-1	Site-specific recombinase XerD	58482e65ea064b5890fa3236	ATGCAGCACGCGAACGTATCCGCACCCAGCTCCATTGATACCCGCCCAGGACTGAGCGGTGAGGATCTGTTGGCCGCCTATCTCACCCGCCTGGCCGCCACGGGCCGGGGAAACGTGGTCTATGAGCGGGCTGCGCGGAACTTCTTCCGCACCTGGCCCAACCCGCAGGCCTGGGCCGCCCAGCCACTGACCGATCGCCTCGCGGCCGACAATCAGACCCGACCGGTCATCACGTTCCTCATGCTCCACCATGGATTCCGACCTGGCTACGATTATCTACTCGAACGTAAACTGTCCTCGGTGTGGCGCGAAATCGATGGCAGCCCCCTAGAAACCGAAATTGATCGCTTCCTCACAGCTTCCGAAAACCTGGGCTTTTCGATGCGAGTGCGCCTGGCA…
Brevibacterium linens 341_13	1	Ga0115324_1351	Ga0115324_135	25	1300	1275	-1	Transposase (or an inactivated derivative)	58482e65ea064b5890fa32a9	ATGGCTGACCCCAATTCTGCCGTGTCGACCCTGATCAACCAAGTCCTGACCGACCCTGACCTCGCCCACTCCGACGTGTTTAGGCAAATGCTCCAAGCTGGCCTCCAGGACCTCATCGAAGCCGAAGCCACCGCCACGATCGGTGCCGCCCGCTACGAACGCAGCGAAGACCGTTCAACACGCCGTAACGGGTCGCGGAAGAAGACCCTGGCAACTCCCTCGGGAGAAGTCGACCTGGCGATCCCGAAGCTACGGAAAGGCTCGTTCTTCCCGTCCCTGCTCAATCCCCGTCGGCGGGTCGATAAGGCCCTCTACGCCGTCATCTGCCAGGCCTGGATCGACGGAGTCTCGACGAGGAAGGTCGATGACCTTGTGCGTGCTTTGGGCAACGAGTCCGGG…
Brevibacterium linens 738_8	1	Ga0115325_100689	Ga0115325_1006	90354	91626	1272	1	Integrase core domain-containing protein	58482e67ea064b5890fa387f	ATGAACACCAGAATCGAGATCACGAAGAAATACGCCACCGCGTATGCCAAGGCCGGCAGGCAACAAAAGTCGGCCATCCTCGATGCCGTCACCGACATCACTGGCTGGAACCGCGACCACGCTCGCCAACAGCTCATGCGTCGGACTCGCCAGCCCAAGGGCAGAGCCAACGCCACCGTGGCCGTGATCGATCGACGCAAGACTAAGGCCCGTAAGTACTCCTACGACGCGATCAAGATCCTGCAGTATGTGTGGTCAGTTGCCGGTGGAATCTGCGGCAAATACCTCGCCCAAGCTATGGTCGATCTCCTCAACTCCCTCGAAGCCCACAACCACCTCGTGCCTGGCCAGGGCCGCTACAGCACGAACGTACGCGACGAGCTGGTGTCGATGAGTCCA…
Brevibacterium linens 738_8	1	Ga0115325_101251	Ga0115325_1012	48304	50002	1698	1	Dynamin family protein	58482e6bea064b5890fa434f	ATGACAGACAGTAAGAGTGCCGTGACGCCACCAGTGGGAGGGGCGCTGAGCGATATCGCGAAGCGAGTCTCAGAAACCCACTTCACCCTGCAGACCGACGACTTCGCCGACGGTCGCGAACTGCACCGACAGCTCTCCTCGGAGCTGACGGACTATCTGCTCCCGCGCATCAATCGGACGCAGACGCCCTTCATGATCGCGGTCGGTGGGTCAACTGGCGCAGGCAAGTCCACCTTGGTGAATTCCCTGGTCGGACGCACGGTGACTCCCGCGGGGGTGCGCCGTCCGACGACGGGCAACCCGATCGTGGTGCACAACCCTGCTGACACCAAATTCTTCGAATCGCAGTCCTTTCTCTCTGATCTGCCGCGCAGCACGGATCCGACGACGCAGACCCCC…
Brevibacterium linens 738_8	1	Ga0115325_101252	Ga0115325_1012	49998	51579	1581	1	50S ribosome-binding GTPase	58482e6bea064b5890fa4351	GTGAACGATCCTGCACAGTCCGAGATCAGGCGTCGAGCCGAAGGAATTCGGCAGACCCTGTCCCTGGGACCCGACAAATTGAGCGCCGAAGTTCGTACGGACGCGCAGAACCTGCTCAACCGTGCCGAGGATCGGCTCGGCCTGGGCGAGGAGTTCACCGTCGTGGCCTTCGCCGGCTCCACCGGTTCGGGAAAGTCCTCTCTGTTCAATGCCGTTGCCGGACTGGACATCGCCCGGGTCGGCGTTCGTCGGCCCACCACCTCCCGTCCCACTGCATGTGTGTGGGGCGAAGGCGGCAACGACATCCTCAATTGGCTCCATGTGCCCGAGCGCAGCAGGACCTGGCGCGAATCAGCGCTCGACGGTGATGATCAGCGCAAGCTGCACGGCCTGATTCTG…
Brevibacterium linens 738_8	1	Ga0115325_101253	Ga0115325_1012	51787	52387	600	1	single-strand DNA-binding protein	58482e6bea064b5890fa4353	ATGTCCATCATCCCGATCAACCTCAGCGGCACAGTGGCCGCCGATCCGCAGAGCCGCACCCTGCCGTCTGGCAGAGCCTGCGCCTCCTTTCGGTTGGCCGTCAACCATTGGCGCCTCGACAAAGGAACCGGAGAGTATCTCTCCGACACGACCTCGTGGTTCAGCGTCGACTGCTACGGGCCTCTGGCCAGCAACTGCTCGATGAGTCTGCACCAAGGTATGTCCGTCGTCGTACAGGGGACCCTGAAGATTCGGGAATGGTCGACTGATGAGAAGCGGGGAATCGCTCCCACCGTTGTTGCAGAACACATCGGTCCCGATCTTCGCTACGGCACCGCCAACTATCAGAAGTCCAGTAACCCGAATCGGCAAACCGAAGGTCAGCAGCAGACGGCTGCA…	K03111
Brevibacterium linens 738_8	1	Ga0115325_101254	Ga0115325_1012	52530	53256	726	1	hypothetical protein	58482e6bea064b5890fa4355	ATGCGTCTCGTTCCCCTCCTAGGTCTTGGAGCCCTGACCTTGGCTCTCTCGGGTTGTTCGCTGCTGGGATTGGGCGGAGATGATTCGTCGCCCACTCCGGCTCGCACCCCGGCGAAGCCGGTTGCAGAGGTCGACAAGGTCGTTTCCGCACTGAAACCTCTGACCGGCAACGAAGACACGGTTCCGTCGACGAAGAAATTCTTCACAACGATGATCGATGCCGGCTACGATCCGGAGCAGCTTGAGGCTACGATCGATGACTCCCCGCTGGGCAATGACGTGCCCTCGAAGATGTTCGGCGTCAAAACGGACAAAGGGTGCGTGATCGGTGAGATACGAAAGGGAAAGGCCACCGCAGAGCTGATGCCGCCCACCGAATCGACCGGGGCATGCCTGTTC…
Brevibacterium linens 738_8	1	Ga0115325_101255	Ga0115325_1012	53322	55005	1683	1	ATP-binding cassette protein ChvD family	58482e6bea064b5890fa4357	ATGGCCGAATTCATTTACACCCTTCACAAGGCGCGTAAAGCGCACGGCGACAAAGTCATCCTCGATGACGTGTCGATGTCCTTCTACCCCGGCGCGAAGATCGGCATGGTCGGTCCCAACGGTGCCGGTAAGTCTACGATCCTCAAGATCATGGCCGGGCTCGAGCAGCCGTCCAATGGCGAGGCTCGGCTCAGCCCCGGGTACACCGTGGGCATTCTCCTGCAGGAGCCGCCCCTGAACGAGGACAAGACCGTCCTCGGCAACGTCCAAGAGGGCGTCGGCGAGATCAAGGCAAAGCTGGACCGCTTCAACGCCATCTCCGAGGAGATGGCCAGCCCTGATGCCGACTTCGATGCCCTGATGGAAGAGATGGGCAAGCTGCAAGAAGCTATCGATGCC…
Brevibacterium linens 738_8	1	Ga0115325_101257	Ga0115325_1012	55355	56264	909	-1	acyl-CoA thioesterase-2	58482e6bea064b5890fa435b	ATGAGCGATGCAGAACCCACAGCGGCCGAGGCGAATGTCGACACGCTGCGCAAAGTGCTCGAACTCGAAAGTCTGAGCTTCACCTCGGCGTCTCGGGAGAGTGACTACTTCCTCGGACAGAATCAGTACAAACCCGATGGGCGCGTCTACGGCGGTCAGGTCGTGGCGCAATCTGTGGTGGCCGCTGCCGCGACCCTGCCAGATGATCGCCTCATCCACTCACTTCACGGCTACTTCCTGCGCGCTGGGGATGTCAGCGAGCCGATTGAGTTCGGTGTCGAACGACTGCGCGACGGGCGATCTTTCTCCGCTCGACGCGTCCACGCCTATCAGAAGGACGTCCCGATCCTGTCCCTGATCGCCTCCTTCCAGGTTGAGCAGGAGGGTCTCGAACACGCA…	K10805
Brevibacterium linens 738_8	1	Ga0115325_101258	Ga0115325_1012	56349	56901	552	1	acyl-CoA thioester hydrolase	58482e6bea064b5890fa435d	ATGGGACATATGCACAACCGCACCACGAATCCCCATCTGAACGAATTCACACGAGTCCTGTTGGAACTGAGATGGGGAGACATGGATGCCTATGGCCACGTCAACAATGTCACCCAGCTGCGTCTGCTCGAAGAGGCACGCGTCCGCGCTCTGGGCTCACCGACGCACAGCACCGATGCACCCACGACTCCGGGTCAATCGGGAATTGCCGAGACAGTTTCGGGGATCACAATTCCGTCGATCTTCGCCGAGGCTTCGGAGACCACCGAGCTGCTCGTCGCCTCGCATGCGATCGAATATCGTCGTCCCATTCCCTACCGTGCAGGTCCCATTGCCATCGATCTCGTCATCAGCGAGGTCAAACCGGCCTCTGTGACGATCGGTTACAGCATCGCCGAA…	K07107
Brevibacterium linens 738_8	1	Ga0115325_101259	Ga0115325_1012	56897	57572	675	1	hypothetical protein	58482e6bea064b5890fa435f	ATGACTGAACTCGAGATCGCCGATCCGCTGGCGATGAAGGATCTGGCCGCGTTCACCTCCTTGGCACACCGGCTCGACCCTGACGGGGCTATGCGCTTGCATGTGTCATCGACCGTGCTCGTCGTCACCGTTGCGCCCCTGTATCCGCATGGCATCGGAGACTCCACACCGTTGGTCCTCGCGATGCGAATGCTGCGCCTGAGCGGACCGGAGATGGACGGCCTCGACGAGGTGGTTCCCCTGACCAACCTCAAGGACCGGTTCGCGCGCGCCGAAAATGCCACACGCCTGCCTGTGCCCCCGAACTCGGTGCTGGTGTCCTGGACCGGCATTGCCCCGCCGAAGGGACAGTGGGCTGTTCGCGACAGGATCTCCGGCAATGAGATTCGGTCCACCGCC…
Brevibacterium linens 738_8	1	Ga0115325_101261	Ga0115325_1012	58054	59173	1119	-1	small conductance mechanosensitive channel	58482e6bea064b5890fa4363	ATGACTTTCGATGCTTTGAATACCGACCTGTTGTCCGCACCCAAGATCGATTGGGACTTTCTCCTCGACGCTCCGTTGAGGATCCTCATCATCATCGTCATCGCCATCGTGCTCAACATGGTGATGCGGTACTTCATCCGACGCTTCTCCACTGCCGTGGCCAAAGGCACCGTCGGCAGTCAGAAGGCTGCGGAGAACGGCAAGTTCTCGGCCACGGTCATGGAATCGCAGCGGACGGGCATCGACCCGGCGACGATCCGCGAACGCCGTGCTCAGCGTGCGAAGACTGTCGGTCGGATGCTCTCGTCTGTGGCGACGATCCTCATCAGCGCCGTCGCAGTCCTCATGATCCTCGACCAGCTCAACTTCAACATCGCACCCATTCTGGCCTCGGCAGGT…	K03442
Brevibacterium linens 738_8	1	Ga0115325_101262	Ga0115325_1012	59185	61840	2655	-1	aminopeptidase N	58482e6bea064b5890fa4365	GTGCCCCAATACAACCTCACCCGCGAGGAAGCTCGCAGACGTTCATCACTCGTCGACGTCTCGAGCTACGAGAACACCCTGATTCTCACGGGAGTGGGTGAGAGCTTCCGAGTTCGCTCCCGCATCCGCTTCACCGCAACGCCGGAGTCCACGACCTTCATCGATGCCATCACAGCCAGCGTCGAACGCATCCGGCTCAACGGACTCGATCTCGAGACCTCCGAGGTCGTCTCCCCCTCACGCATCACTCTGCCTGGCCTTGCCGCAGAGAACGAACTCACCATCGATGCGCACTTCTCCTACATGAACACCGGTGAGGGTCTGCACCGGTTCATCGATCCCATCGACGACGAGGTCTACCTCTACTCACAGTTCGAGGTCCCCGACGCCAGACGTGTC…	K01256
Brevibacterium linens 738_8	1	Ga0115325_101263	Ga0115325_1012	61986	62592	606	1	DSBA-like thioredoxin domain-containing protein	58482e6bea064b5890fa4367	ATGAGCAGAGAGACACTTGACCTGTGGTTCGACACGGCCTGCCCGTGGGCGTGGATGACGTCGCGCTGGGGTCTGGAAGTCGCCAAGGTCCGTGACATCGATGTGAAGTTCCATGTCATGAGCCTGAACATCCTCAACCGGGACAAAGACATCCCCGCCGACTATCGAGCGCTCATGGATCGTGCTCTGGCACCCATGCGCATCGTCACCGCGGCCATCGCCGAACACGGCGAGGAGATCACCGAGCCCCTATACACGGCGATCGGAACCCGCATCCACCCAGGTGGAGAGAAGGACTTCGACAAGGCCGTCGCCGAGGCGTTGGATGAGGTCGGTCTGCCGGCTGACCTGATGAAATACGGCGAACGCGATGACTACGATGCGGCGCTGCAGGAGTCC…
Brevibacterium linens 738_8	1	Ga0115325_101265	Ga0115325_1012	63144	64257	1113	1	alcohol dehydrogenase	58482e6bea064b5890fa436b	GTGAAGATCCGAGGTGCGGTGCTTCGCGAGATGGGGGCCGCCCGCCCCTATGCGAGAACTGAGCCGATGTCGATCGAGGAGCTCGAGCTCGATGGGCCCGGCCCCGGTGAGGTGCTCATCCGACTGAGCGCTGCCGGCGTCTGCCATTCCGACCTGTCCGTCGTCGACGGCAACCGTCCACGGCCCCTGCCGATGCTCCTCGGCCACGAAGGCGCGGGCATCGTCGAAGAACTCGGCGAAGGCGTCACCGACCTCGAGATCGGTGAGCAGGTCGTGACCGTGTTCCTGCCCCGCTGCGGCGAGTGTGCGAACTGCCGCACCGACGGCAAACTCCCGTGCACACCGGGAAGCGCCACGAATGGGGCCGGCACGCTCCCATTCGACGGACACAAGGTCCGA…
Brevibacterium linens 738_8	1	Ga0115325_101266	Ga0115325_1012	64278	65505	1227	-1	Glucose/arabinose dehydrogenase beta-propeller fold	58482e6bea064b5890fa436d	ATGTCGATCCGAGACCACGACAGCAGTCCCCTGAGTTCGCGTCCTTCACCCCCAGCTCTACGGCGCACCAACCCGCAGGTGGGAACATCTCCGACGACGACTCATCATCGAAGCCGCGCTGCCGGGCTCATTCTGGCGCTGGTTCTCAGCGGCTGCAGCTCCGATCGTCCACCTGCCCCCTCGGCTACCTCGTCGTCGCCCACATCAGCTGCCGGCGACACGACCGGCGAGGAACGCGGGTCCACCGCAGACCCCGAGGAGGTGGCGACGAATCTTCAGGCTCCATGGTCGATCGCCTTCTACAAGGGCACGGCGTTGGTCAGTGAGAGAGACTCCGCTCGCATCCTCGAAGTCGACGACGAACGCCCAGCACAGCCCAGAGAGGTCACGACGGTCGCC…
Brevibacterium linens 738_8	1	Ga0115325_101278	Ga0115325_1012	73300	74788	1488	1	hypothetical protein	58482e6bea064b5890fa4385	GTGCGCCCGGGTTCCCACGCAGGCTCTCTGCCCGAACGACATTGCATGACACCACGCCGGATGACCGAGGCGGCTCCATTCACAGCCGAAGGCAGCCCACGTCAGAAAGTCCGTTTCCACATGACATCCGATCCCCAGCGCCGTCGACCGTTCCGGTCCCGGCCGAGTCGCCGTCAGCTCCTCACCGGTGCCCTGAGCGGTGCAGGCGTGCTCGGTGCCGGCTTCGTGACATCGTCGGGAACCGACATCCTCGCCGAGGTGGGCCGGAATGATCATCTTCGCTCGGTCACGGTCGCCTTCACATCGGGGACCACTCGGGAGGGTGTTGGGGCAGAAGCGGGACTGGAACTGCAGCCAGATTCCCGTGTCATGCCCGGAATCGAGGATCCGGGGCCGAAG…
Brevibacterium linens 738_8	1	Ga0115325_101279	Ga0115325_1012	75048	76419	1371	1	trigger factor	58482e6bea064b5890fa4387	GTGAAGAGCTCCGTCGAGCAACTCGACCCCACGCGGGTCAAGATCAGCGTGGATGTCCCATACGCCGAACTCAAGCCGAGCATCGACGAGGCATACAAGACCATCGGTGGCCAGGTGACCATCCCCGGCTTCCGCCAGGGCAAGGTCCCTGCTCGAATCATCGATCAGCGCGTTGGTCGACCTGCAGTGATCCAGGAGGCCGTCAACAACGGTCTTGACGGGTTCTACCGCGAAGCCGTCGAAGAGAACGATCTCAAGCCGCTGGGCCAGCCCGAGGTTGAGATCTCAGAGGTCCCCGGCCTCGACGGCACCGAAGACGGCGACCTGACCTTCACGGTCGAGGTTGACGTTCGCCCGGCGATCGAACTGCCTGCCTACGACACCATCAGCGTCGAGGTC…	K03545
Brevibacterium linens 738_8	1	Ga0115325_10261	Ga0115325_1026	118	1393	1275	1	Transposase (or an inactivated derivative)	58482e6fea064b5890fa4fcb	ATGGCTGACCCCAATTCTGCCGTGTCGACCCTGATCAACCAAGTCCTGACCGACCCTGACCTCGCCCACTCCGACGTGTTTAGGCAAATGCTCCAAGCTGGCCTCCAGGACCTCATCGAAGCCGAAGCCACCGCCACGATCGGTGCCGCCCGCTACGAACGCAGCGAAGACCGTTCAACACGCCGTAACGGGTCGCGGAAGAAGACCCTGGCAACTCCCTCGGGAGAAGTCGACCTGGCGATCCCGAAGCTACGGAAAGGCTCGTTCTTCCCGTCCCTGCTCAATCCCCGTCGGCGGGTCGATAAGGCCCTCTACGCCGTCATCTGCCAGGCCTGGATCGACGGAGTCTCGACGAGGAAGGTCGATGACCTTGTGCGTGCTTTGGGCAACGAGTCCGGG…
Brevibacterium linens 738_8	1	Ga0115325_10441	Ga0115325_1044	1	598	597	-1	Integrase core domain-containing protein	58482e6fea064b5890fa50f4	ATGATGTACCCGCTGGTCCTGGACCTTGCTGCCACCGGGGTGCCGGTGGCAGTGACCTGTCGGGAGCTCGGCTTTACCAAGCAGGGGTTCTACAAGTGGTGCGCTCATCCGGTCTCAGCTCGGGACTGGGACGAGGCACATCTGATCAATGCCGCCTACGACGTTCATACGGACGATCCTGAGTTCGGGCACCGGTTCATCGCCGATGAACTCCACGCCGCGGGTCTGCAGACGTCAGAGCGTCGTGTGTGGCGATTGTGCTCGCAGCAGCAGTTGTTCTCGCACACGATCAAACGAGCCCGGAAACACGGCAAGAAGCCCGGCCCGCCAGTGTGTGACGACCTCGTCGAACGCGACTTCACTGCCAAGGCAATCAACGAGTTGTGGCTGACCGACGTT…
Brevibacterium linens 738_8	1	Ga0115325_10562	Ga0115325_1056	1153	3127	1974	1	Site-specific recombinase XerD	58482e6fea064b5890fa513e	ATGCAGCACGCGAACGTATCCGCACCCAGCTCCATTGATACCCGCCCAGGACTGAGCGGTGAGGATCTGTTGGCCGCCTATCTCACCCGCCTGGCCGCCACGGGCCGGGGAAACGTGGTCTATGAGCGGGCTGCGCGGAACTTCTTCCGCACCTGGCCCAACCCGCAGGCCTGGGCCGCCCAGCCACTGACCGATCGCCTCGCGGCCGACAATCAGACCCGACCGGTCATCACGTTCCTCATGCTCCACCATGGATTCCGACCTGGCTACGATTATCTACTCGAACGTAAACTGTCCTCGGTGTGGCGCGAAATCGATGGCAGCCCCCTAGAAACCGAAATTGATCGCTTCCTCACAGCTTCCGAAAACCTGGGCTTTTCGATGCGAGTGCGCCTGGCA…
Brevibacterium linens 862_7	1	Ga0115326_1004261	Ga0115326_1004	280919	281843	924	1	transcriptional regulator AsnC family	58482e70ea064b5890fa564e	ATGGTGACGGAAAGCGTTTTTGCGAACTCACGCCAGATGGTGCTTCAGGCACTGCGTGATGATGGGCGAGCGAGCTTTGCCCAAATCGCCAAGAACGTCGGACTTGCGCGGCACCAAGTGGCGGCGATAGTTAAGGCAGCGGTCGCCGAAGACGAACTTCGCCTGACAGTATCGATTAGCCCGGACCTCCTGGGTCTTGAACGGTTCGCATATTTGCAGATCGTTGTCTCTGGCCCCGTACAGCCGGTTCGGGACGCACTCGTGTCGATGACGGAGTCAACATTTGTCGCCGACATCGCCGGTCACTATTCGATCGACGCTGAGGTGAGAGTGGGTCCAGATCCTCACCTACGACGAACCCTCGACGCCATTCTGCAACTGCCAGGCGTCAGCGACATC…
Brevibacterium linens 862_7	1	Ga0115326_103455	Ga0115326_1034	59953	61324	1371	-1	trigger factor	58482e74ea064b5890fa65bd	GTGAAGAGCTCCGTCGAGCAACTCGACCCCACGCGGGTCAAGATCAGCGTGGATGTCCCATACGCCGAACTCAAGCCGAGCATCGACGAGGCATACAAGACCATCGGTGGCCAGGTGACCATCCCCGGCTTCCGCCAGGGCAAGGTCCCTGCTCGAATCATCGATCAGCGCGTTGGTCGACCTGCAGTGATCCAGGAGGCCGTCAACAACGGTCTTGACGGGTTCTACCGCGAAGCCGTCGAAGAGAACGATCTCAAGCCGCTGGGCCAGCCCGAGGTTGAGATCTCAGAGGTCCCCGGCCTCGACGGCACCGAAGACGGCGACCTGACCTTCACGGTCGAGGTTGACGTTCGCCCGGCGATCGAACTGCCTGCCTACGACACCATCAGCGTCGAGGTC…	K03545
Brevibacterium linens 862_7	1	Ga0115326_103456	Ga0115326_1034	61584	63072	1488	-1	hypothetical protein	58482e74ea064b5890fa65bf	GTGCGCCCGGGTTCCCACGCAGGCTCTCTGCCCGAACGACATTGCATGACACCACGCCGGATGACCGAGGCGGCTCCATTCACAGCCGAAGGCAGCCCACGTCAGAAAGTCCGTTTCCACATGACATCCGATCCCCAGCGCCGTCGACCGTTCCGGTCCCGGCCGAGTCGCCGTCAGCTCCTCACCGGTGCCCTGAGCGGTGCAGGCGTGCTCGGTGCCGGCTTCGTGACATCGTCGGGAACCGACATCCTCGCCGAGGTGGGCCGGAATGATCATCTTCGCTCGGTCACGGTCGCCTTCACATCGGGGACCACTCGGGAGGGTGTTGGGGCAGAAGCGGGACTGGAACTGCAGCCAGATTCCCGTGTCATGCCCGGAATCGAGGATCCGGGGCCGAAG…
Brevibacterium linens 862_7	1	Ga0115326_103459	Ga0115326_1034	63687	64914	1227	1	Glucose/arabinose dehydrogenase beta-propeller fold	58482e74ea064b5890fa65c5	ATGTCGATCCGAGACCACGACAGCAGTCCCCTGAGTTCGCGTCCTTCACCCCCAGGTCACCGGCGCACCAACCCGCAGGTGGGAACATCTCCGACGACGACTCATCATCGAAGCCGCGCTGCCGGGCTCATTCTGGCGCTGGTTCTCAGCGGCTGCAGCTCCGATCGTCCACCTGCCCCCTCGGCTACCTCGTCGTCGCCCACATCAGCTGCCGGCGACACGACCGGCGAGGAACGCGGGTCCACCGCAGACCCCGAGGAGGTGGCGACGAATCTTCAGGCTCCATGGTCGATCGCCTTCTACAAGGGCACGGCGTTGGTCAGTGAGAGAGACTCCGCTCGCATCCTCGAAGTCGACGACGAACGCCCAGCACAGCCCAGAGAGGTCACGACGGTCGCC…
Brevibacterium linens 862_7	1	Ga0115326_103460	Ga0115326_1034	64935	66048	1113	-1	alcohol dehydrogenase	58482e74ea064b5890fa65c7	GTGAAGATCCGAGGTGCGGTGCTTCGCGAGATGGGGGCCGCCCGCCCCTATGCGAGAACTGAGCCGATGTCGATCGAGGAGCTCGAGCTCGATGGGCCCGGCCCCGGTGAGGTGCTCATCCGACTGAGCGCTGCCGGCGTCTGCCATTCCGACCTGTCCGTCGTCGACGGCAACCGTCCACGGCCCCTGCCGATGCTCCTCGGCCACGAAGGCGCGGGCATCGTCGAAGAACTCGGCGAAGGCGTCACCGACCTCGAGATCGGTGAGCAGGTCGTGACCGTGTTCCTGCCCCGCTGCGGCGAGTGTGCGAACTGCCGCACCGACGGCAAACTCCCGTGCACACCGGGAAGCGCCACGAATGGGGCCGGCACGCTCCCATTCGACGGACACAAGGTCCGA…
Brevibacterium linens 862_7	1	Ga0115326_103462	Ga0115326_1034	66600	67206	606	-1	DSBA-like thioredoxin domain-containing protein	58482e74ea064b5890fa65cb	ATGAGCAGAGAGACACTTGACCTGTGGTTCGACACGGCCTGCCCGTGGGCGTGGATGACGTCGCGCTGGGGTCTGGAAGTCGCCAAGGTCCGTGACATCGATGTGAAGTTCCATGTCATGAGCCTGAACATCCTCAACCGGGACAAAGACATCCCCGCCGACTATCGAGCGCTCATGGATCGTGCTCTGGCACCCATGCGCATCGTCACCGCGGCCATCGCCGAACACGGCGAGGAGATCACCGAGCCCCTATACACGGCGATCGGAACCCGCATCCACCCAGGTGGAGAGAAGGACTTCGACAAGGCCGTCGCCGAGGCGTTGGATGAGGTCGGTCTGCCAGCTGACCTGATGAAATACGGCGAACGCGATGACTACGATGCGGCGCTGCAGGAGTCC…
Brevibacterium linens 862_7	1	Ga0115326_103463	Ga0115326_1034	67352	70007	2655	1	aminopeptidase N	58482e74ea064b5890fa65cd	GTGCCCCAATACAACCTCACCCGCGAGGAAGCTCGCAGACGTTCATCACTCGTCGACGTCTCGAGCTACGAGAACACCCTGATTCTCACGGGAGTGGGTGAGAGCTTCCGAGTTCGCTCCCGCATCCGCTTCACCGCAACGCCGGAGTCCACGACCTTCATCGATGCCATCACAGCCAGCGTCGAACGCATCCGGCTCAACGGACTCGATCTCGAGACCTCCGAGGTCGTCTCCCCCTCACGCATCACTCTGCCTGGCCTTGCCGCAGAGAACGAACTCACCATCGATGCGCACTTCTCCTACATGAACACCGGTGAGGGTCTGCACCGGTTCATCGATCCCATCGACGACGAGGTCTACCTCTACTCACAGTTCGAGGTCCCCGACGCCAGACGTGTC…	K01256
Brevibacterium linens 862_7	1	Ga0115326_103464	Ga0115326_1034	70019	71138	1119	1	small conductance mechanosensitive channel	58482e74ea064b5890fa65cf	ATGACTTTCGATGCTTTGAATACCGACCTGTTGTCCGCACCCAAGATCGATTGGGACTTTCTCCTCGACGCTCCGTTGAGGATCCTCATCATCATCGTCATCGCCATCGTGCTCAACATGGTGATGCGGTACTTCATCCGACGCTTCTCCACTGCCGTGGCCAAAGGCACCGTCGGCAGTCAGAAGGCTGCGGAGAACGGCAAGTTCTCGGCCACGGTCATGGAATCGCAGCGGACGGGCATCGACCCGGCGACGATCCGCGAACGCCGTGCTCAGCGTGCGAAGACTGTCGGTCGGATGCTCTCGTCTGTGGCGACGATCCTCATCAGCGCCGTCGCAGTCCTCATGATCCTCGACCAGCTCAACTTCAACATCGCACCCATTCTGGCCTCGGCAGGT…	K03442
Brevibacterium linens 862_7	1	Ga0115326_103466	Ga0115326_1034	71620	72295	675	-1	hypothetical protein	58482e74ea064b5890fa65d3	ATGACTGAACTCGAGATCGCCGATCCGCTGGCGATGAAGGATCTGGCCGCGTTCACCTCCTTGGCACACCGGCTCGACCCTGACGGGGCTATGCGCTTGCATGTGTCATCGACCGTGCTCGTCGTCACCGTTGCGCCCCTGTATCCGCATGGCATCGGAGACTCCACACCGTTGGTCCTCGCGATGCGAATGCTGCGCCTGAGCGGACCGGAGATGGACGGCCGCGACGAGGTGGTTCCCCTGACCAACCTCAAGGACCGGTTCGCGCGCGCCGAAAATGCCACACGCCTGCCTGTGCCCCCGAACTCGGTGCTGGTGTCCTGGACCGGCATTGCCCCGCCGAAGGGACAGTGGGCTGTTCGCGACAGGATCTCCGGCAACGAGATTCGGTCCACCGCC…
Brevibacterium linens 862_7	1	Ga0115326_103467	Ga0115326_1034	72291	72843	552	-1	acyl-CoA thioester hydrolase	58482e74ea064b5890fa65d5	ATGGGACATATGCACAACCGCACCACGAATCCCCATCTGAACGAATTCACACGAGTCCTGTTGGAACTGAGATGGGGAGACATGGATGCCTATGGCCACGTCAACAATGTCACCCAGCTGCGTCTGCTCGAAGAGGCACGCGTCCGCGCTCTGGGCTCACCGACGCACAGCACCGATGCACCCACGACTCCGGGTCAATCGGGAATTGCCGAGACAGTTTCGGGGATCACAATTCCGTCGATCTTCGCCGAGGCTTCGGAGACCACCGAGCTGCTCGTCGCCTCGCATGCGATCGAATATCGTCGTCCCATTCCCTACCGTGCAGGTCCCATTGCCATCGATCTCGTCATCAGCGAGGTCAAACCGGCCTCTGTGACGATCGGTTACAGCATCGCCGAA…	K07107
Brevibacterium linens 862_7	1	Ga0115326_103468	Ga0115326_1034	72928	73837	909	1	acyl-CoA thioesterase-2	58482e74ea064b5890fa65d7	ATGAGCGATGCAGAACCCACAGCGGCCGAGGCGAATGTCGACACGCTGCGCAAAGTGCTCGAACTCGAAAGTCTGAGCTTCACCTCGGCGTCTCGGGAGAGTGACTACTTCCTCGGACAGAATCAGTACAAACCCGATGGGCGCGTCTACGGCGGTCAGGTCGTGGCGCAATCTGTGGTGGCCGCTGCCGCGACCCTGCCAGATGATCGCCTCATCCACTCACTTCACGGCTACTTCCTGCGCGCTGGGGATGTCAGCGAGCCGATTGAGTTCGGTGTCGAACGACTGCGCGACGGGCGATCTTTCTCCGCTCGACGCGTCCACGCCTATCAGAAGGACGTCCCGATCCTGTCCCTGATCGCCTCCTTCCAGGTTGAGCAGGAGGGTCTCGAACACGCA…	K10805
Brevibacterium linens 862_7	1	Ga0115326_103470	Ga0115326_1034	74187	75870	1683	-1	ATP-binding cassette protein ChvD family	58482e74ea064b5890fa65db	ATGGCCGAATTCATTTACACCCTTCACAAGGCGCGTAAAGCGCACGGCGACAAAGTCATCCTCGATGACGTGTCGATGTCCTTCTACCCCGGCGCGAAGATCGGCATGGTCGGTCCCAACGGTGCCGGTAAGTCTACGATCCTCAAGATCATGGCCGGGCTCGAGCAGCCGTCCAATGGCGAGGCTCGGCTCAGCCCCGGGTACACCGTGGGCATTCTCCTGCAGGAGCCGCCCCTGAACGAGGACAAGACCGTCCTCGGCAACGTCCAAGAGGGCGTCGGCGAGATCAAGGCAAAGCTGGACCGCTTCAACGCCATCTCCGAGGAGATGGCCAGCCCTGATGCCGACTTCGATGCCCTGATGGAAGAGATGGGCAAGCTGCAAGAAGCTATCGATGCC…
Brevibacterium linens 862_7	1	Ga0115326_103471	Ga0115326_1034	75936	76662	726	-1	hypothetical protein	58482e74ea064b5890fa65dd	ATGCGTCTCGTTCCCCTCCTAGGTCTTGGAGCCCTGACCTTGGCTCTCTCGGGTTGTTCGCTGCTGGGATTGGGCGGAGATGATTCGTCGCCCACTCCGGCTCGCACCCCGGCGAAGCCGGTTGCAGAGGTCGACAAGGTCGTTTCCGCACTGAAACCTCTGACCGGCAGCGAAGACACGGTTCCGTCGACGAAGAAATTCTTCACAACGATGATCGATGCCGGCTACGATCCGGAGCAGCTTGAGGCTACGATCGATGACTCCCCGCTGGGCAATGACGTGCCCTCGAAGATGTTCGGCGTCAAAACGGACAAAGGGTGCGTGATCGGGGAGATACGAAAGGGAAAGGCCACCGCAGAGCTGATGCCGCCCACCGAATCGACCGGGGCATGCCTGTTC…
Brevibacterium linens 862_7	1	Ga0115326_103472	Ga0115326_1034	76805	77405	600	-1	single-strand DNA-binding protein	58482e74ea064b5890fa65df	ATGTCCATCATCCCGATCAACCTCAGCGGCACAGTGGCCGCCGATCCGCAGAGCCGCACCCTGCCGTCTGGCAGAGCCTGCGCCTCCTTTCGGTTGGCCGTCAACCATTGGCGCCTCGACAAAGGAACCGGAGAGTATCTCTCCGACACGACCTCGTGGTTCAGCGTCGACTGCTACGGGCCTCTGGCCAGCAACTGCTCGATGAGTCTGCACCAAGGTATGTCCGTCGTCGTACAGGGGACCCTGAAGATTCGGGAATGGTCGACTGATGAGAAGCGGGGAATCGCTCCCACCGTTGTTGCAGAACACATCGGTCCCGATCTTCGCTACGGCACCGCCAACTATCAGAAGTCCAGTAACCCGAATCGGCAAACCGAAGGTCAGCAGCAGACGGCTGCA…	K03111
Brevibacterium linens 862_7	1	Ga0115326_103473	Ga0115326_1034	77613	79194	1581	-1	50S ribosome-binding GTPase	58482e74ea064b5890fa65e1	GTGAACGATCCTGCACAGTCCGAGATCAGGCGTCGAGCCGAAGGAATTCGGCAGACCCTGTCCCTGGGACCCGACAAATTGAGCGCCGAAGTTCGTACGGACGCGCAGAACCTGCTCAACCGTGCCGAGGATCGGCTCGGCCTGGGCGAGGAGTTCACCGTCGTGGCCTTCGCCGGCTCCACCGGTTCGGGAAAGTCCTCTCTGTTCAATGCCGTTGCCGGACTGGACATCGCCCGGGTCGGCGTTCGTCGGCCCACCACCTCCCGTCCCACTGCATGTGTGTGGGGCGAAGGCGGCAACGACATCCTCAATTGGCTCCATGTGCCCGAGCGCAGCAGGACCTGGCGCGAATCAGCGCTCGACGGTGATGATCAGCGCAAGCTGCACGGCCTGATTCTG…
Brevibacterium linens 862_7	1	Ga0115326_103474	Ga0115326_1034	79190	80888	1698	-1	Dynamin family protein	58482e74ea064b5890fa65e3	ATGACAGACAGTAAGAGTGCCGTGACGCCACCAGTGGGAGGGGCGCTGAGCGATATCGCGAAGCGAGTCTCAGAAACCCGCTTCACCCTGCAGACCGACGACTTCGCCGACGGTCGCGAACTGCACCGACAGCTCTCCTCGGAGCTGACGGACTATCTGCTCCCGCGCATCAATCGGACGCAGACGCCCTTCATGATCGCGGTCGGTGGGTCAACTGGCGCAGGCAAGTCCACCTTGGTGAATTCCCTGGTCGGACGCACGGTGACTCCCGCGGGGGTGCGCCGTCCGACGACGGGCAACCCGATCGTGGTGCACAACCCTGCTGACACCAAATTCTTCGAATCGCAGTCCTTTCTCTCTGATCTGCCGCGCAGCACGGATCCGACGACGCAGACCCCC…
Brevibacterium linens 862_7	1	Ga0115326_10371	Ga0115326_1037	126	1398	1272	1	Integrase core domain-containing protein	58482e75ea064b5890fa689b	ATGAACACCAGAATCGAGATCACGAAGAAATACGCCACCGCGTATGCCAAGGCCGGCAGGCAACAAAAGTCGGCCATCCTCGATGCCGTCACCGACATCACTGGCTGGAACCGCGACCACGCTCGCCAACAGCTCATGCGTCGGACTCGCCAGCCCAAGGGCAGAGCCAACGCCACCGTGGCCGTGATCGATCGACGCAAGACTAAGGCCCGTAAGTACTCCTACGACGCGATCAAGATCCTGCAGTATGTGTGGTCAGTTGCCGGTGGAATCTGCGGCAAATACCTCGCCCAAGCTATGGTCGATCTCCTCAACTCCCTCGAAGCCCACAACCACCTCGTGCCTGGCCAGGGCCGCTACAGCACGAACGTACGCGACGAGCTGGTGTCGATGAGTCCA…
Brevibacterium linens 862_7	1	Ga0115326_10602	Ga0115326_1060	1152	3126	1974	1	Site-specific recombinase XerD	58482e76ea064b5890fa6ca5	ATGCAGCACGCGAACGTATCCGCACCCAGCTCCATTGATACCCGCCCAGGACTGAGCGGTGAGGATCTGTTGGCCGCCTATCTCACCCGCCTGGCCGCCACGGGCCGGGGAAACGTGGTCTATGAGCGGGCTGCGCGGAACTTCTTCCGCACCTGGCCCAACCCGCAGGCCTGGGCCGCCCAGCCACTGACCGATCGCCTCGCGGCCGACAATCAGACCCGACCGGTCATCACGTTCCTCATGCTCCACCATGGATTCCGACCTGGCTACGATTATCTACTCGAACGTAAACTGTCCTCGGTGTGGCGCGAAATCGATGGCAGCCCCCTAGAAACCGAAATTGATCGCTTCCTCACAGCTTCCGAAAACCTGGGCTTTTCGATGCGAGTGCGCCTGGCA…
Brevibacterium linens 862_7	1	Ga0115326_10931	Ga0115326_1093	620	2054	1434	1	RNA-directed DNA polymerase	58482e76ea064b5890fa6f4f	GTGAATACGGGTGTGTCGGGGCCAGTCGATATTACTTCGGCATGGCATCGAGTACTTACGATCCAGACGAAATTGCACCAATGGGCGCGCACCGATCCGGGGCGTGTCTTCGATGATGTGTTCAACCTTGTCCACGATCCGGCCTTCCTCGTAGCAGGGTGGGATCGAGTGCGGGGTAACAAGGGCGGTCGGACTGCTGGAGTCGATGGGGTCGCACCCCGGTCCCTGCTTCATGGTCAGGCCGTTGAGGTGCTCACTATGATTCGCCGCCAGGTGAAGACTGGTGAGTTCCGACCCTTGCCGGTGCGTGAGCGCAGGATCCCGAAGTCGAATGGGAAGACTCGTTCGTTGGGGATTCCAACGCTGGCCGACAGAGTGGTGCAGGCGTCGCTGAAGTTG…
Brevibacterium linens 862_7	1	Ga0115326_11001	Ga0115326_1100	2	884	882	-1	Transposase Mutator family	58482e76ea064b5890fa6f97	ATGGCTGACCCCAATTCTGCCGTGTCGACCCTGATCAACCAAGTCCTGACCGACCCTGACCTCGCCCACTCCGACGTGTTTAGGCAAATGCTCCAAGCTGGCCTCCAGGACCTCATCGAAGCCGAAGCCACCGCCACGATCGGTGCCGCCCGCTACGAACGCAGCGAAGACCGTTCAACACGCCGTAACGGGTCGCGGAAGAAGACCCTGGCAACTCCCTCGGGAGAAGTCGACCTGGCGATCCCGAAGCTACGGAAAGGCTCGTTCTTCCCGTCCCTGCTCAATCCCCGTCGGCGGGTCGATAAGGCCCTCTACGCCGTCATCTGCCAGGCCTGGATCGACGGAGTCTCGACGAGGAAGGTCGATGACCTTGTGCGTGCTTTGGGCAACGAGTCCGGG…
Brevibacterium linens 876_7	1	Ga0115327_104296	Ga0115327_104	318240	319674	1434	-1	RNA-directed DNA polymerase	58482e79ea064b5890fa76c5	GTGAATACGGGTGTGTCGGGGCCAGTCGATATTACTTCGGCATGGCATCGAGTACTTACGATCCAGACGAAATTGCACCAATGGGCGCGCACCGATCCGGGGCGTGTCTTCGATGATGTGTTCAACCTTGTCCACGATCCGGCCTTCCTCGTAGCAGGGTGGGATCGAGTGCGGGGTAACAAGGGCGGTCGGACTGCTGGAGTCGATGGGGTCGCACCCCGGTCCCTGCTTCATGGTCAGGCCGTTGAGGTGCTCACTATGATTCGCCGCCAGGTGAAGACTGGTGAGTTCCGACCCTTGCCGGTGCGTGAGCGCAGGATCCCGAAGTCGAATGGGAAGACTCGTTCGTTGGGGATTCCAACGCTGGCCGACAGAGTGGTGCAGGCGTCGCTGAAGTTG…
Brevibacterium linens 876_7	1	Ga0115327_10655	Ga0115327_106	60980	62351	1371	-1	trigger factor	58482e7aea064b5890fa7957	GTGAAGAGCTCCGTCGAGCAACTCGACCCCACGCGGGTCAAGATCAGCGTGGATGTCCCATACGCCGAACTCAAGCCGAGCATCGACGAGGCATACAAGACCATCGGTGGCCAGGTGACCATCCCCGGCTTCCGCCAGGGCAAGGTCCCTGCTCGAATCATCGATCAGCGCGTTGGTCGACCTGCAGTGATCCAGGAGGCCGTCAACAACGGTCTTGACGGGTTCTACCGCGAAGCCGTCGAAGAGAACGATCTCAAGCCGCTGGGCCAGCCCGAGGTTGAGATCTCAGAGGTCCCCGGCCTCGACGGCACCGAAGACGGCGACCTGACCTTCACGGTCGAGGTTGACGTTCGCCCGGCGATCGAACTGCCTGCCTACGACACCATCAGCGTCGAGGTC…	K03545
Brevibacterium linens 876_7	1	Ga0115327_10656	Ga0115327_106	62611	64099	1488	-1	hypothetical protein	58482e7aea064b5890fa7959	GTGCGCCCGGGTTCCCACGCAGGCTCTCTGCCCGAACGACATTGCATGACACCACGCCGGATGACCGAGGCGGCTCCATTCACAGCCGAAGGCAGCCCACGTCAGAAAGTCCGTTTCCACATGACATCCGATCCCCAGCGCCGTCGACCGTTCCGGTCCCGGCCGAGTCGCCGTCAGCTCCTCACCGGTGCCCTGAGCGGTGCAGGCGTGCTCGGTGCCGGCTTCGTGACATCGTCGGGAACCGACATCCTCGCCGAGGTGGGCCGGAATGATCATCTTCGCTCGGTCACGGTCGCCTTCACATCGGGGACCACTCGGGAGGGTGTTGGGGCAGAAGCGGGACTGGAACTGCAGCCAGATTCCCGTGTCATGCCCGGAATCGAGGATCCGGGGCCGAAG…
Brevibacterium linens 876_7	1	Ga0115327_10668	Ga0115327_106	71894	73121	1227	1	Glucose/arabinose dehydrogenase beta-propeller fold	58482e7aea064b5890fa7971	ATGTCGATCCGAGACCACGACAGCAGTCCCCTGAGTTCGCGTCCTTCACCCCCAGGTCACCGGCGCACCAACCCGCAGGTGGGAACATCTCCGACGACGACTCATCATCGAAGCCGCGCTGCCGGGCTCATTCTGGCGCTGGTTCTCAGCGGCTGCAGCTCCGATCGTCCACCTGCCCCCTCGGCTACCTCGTCGTCGCCCACATCAGCTGCCGGCGACACGACCGGCGAGGAACGCGGGTCCACCGCAGACCCCGAGGAGGTGGCGACGAATCTTCAGGCTCCATGGTCGATCGCCTTCTACAAGGGCACGGCGTTGGTCAGTGAGAGAGACTCCGCTCGCATCCTCGAAGTCGACGACGAACGCCCAGCACAGCCCAGAGAGGTCACGACGGTCGCC…
Brevibacterium linens 876_7	1	Ga0115327_10669	Ga0115327_106	73142	74255	1113	-1	alcohol dehydrogenase	58482e7aea064b5890fa7973	GTGAAGATCCGAGGTGCGGTGCTTCGCGAGATGGGGGCCGCCCGCCCCTATGCGAGAACTGAGCCGATGTCGATCGAGGAGCTCGAGCTCGATGGGCCCGGCCCCGGTGAGGTGCTCATCCGACTGAGCGCTGCCGGCGTCTGCCATTCCGACCTGTCCGTCGTCGACGGCAACCGTCCACGGCCCCTGCCGATGCTCCTCGGCCACGAAGGCGCGGGCATCGTCGAAGAACTCGGCGAAGGCGTCACCGACCTCGAGATCGGTGAGCAGGTCGTGACCGTGTTCCTGCCCCGCTGCGGCGAGTGTGCGAACTGCCGCACCGACGGCAAACTCCCGTGCACACCGGGAAGCGCCACGAATGGGGCCGGCACGCTCCCATTCGACGGACACAAGGTCCGA…
Brevibacterium linens 876_7	1	Ga0115327_10671	Ga0115327_106	74807	75413	606	-1	hypothetical protein	58482e7aea064b5890fa7977	ATGAGCAGAGAGACACTTGACCTGTGGTTCGACACGGCCTGCCCGTGGGCGTGGATGACGTCGCGCTGGGGTCTGGAAGTCGCCATGGTCCGTGACATCGATGTGAAGTTCCATGTCATGAGCCTGAACATCCTCAACCGGGACAAAGACATCCCCGCCGACTATCGAGCGCTCATGGATCGTGCTCTGGCACCCATGCGCATCGTCACCGCGGCCATCGCCGAACACGGCGAGGAGATCACCGAGCCCCTATACACGGCGATCGGAACCCGCATCCACCCAGGTGGAGAGAAGGACTTCGACAAGGCCGTCGCCGAGGCGTTGGATGAGGTCGGTCTGCCGGCTGACCTGATGAAATACGGCGAACGCGATGACTACGATGCGGCGCTGCAGGAGTCC…
Brevibacterium linens 876_7	1	Ga0115327_10672	Ga0115327_106	75559	78214	2655	1	aminopeptidase N	58482e7aea064b5890fa7979	GTGCCCCAATACAACCTCACCCGCGAGGAAGCTCGCAGACGTTCATCACTCGTCGACGTCTCGAGCTACGAGAACACCCTGATTCTCACGGGAGTGGGTGAGAGCTTCCGAGTTCACTCCCGCATCCGCTTCACCGCAACGCCGGAGTCCACGACCTTCATCGATGCCATCACAGCCAGCGTCGAACGCATCCGGCTCAACGGACTCGATCTCGAGACCTCCGAGGTCGTCTCCCCCTCACGCATCACTCTGCCTGGCCTTGCCGCAGAGAACGAACTCACCATCGATGCGCACTTCTCCTACATGAACACCGGTGAGGGTCTGCACCGGTTCATCGATCCCATCGACGACGAGGTCTACCTCTACTCACAGTTCGAGGTCCCCGACGCCAGACGTGTC…	K01256
Brevibacterium linens 876_7	1	Ga0115327_10673	Ga0115327_106	78226	79345	1119	1	small conductance mechanosensitive channel	58482e7aea064b5890fa797b	ATGACTTTCGATGCTTTGAATACCGACCTGTTGTCCGCACCCAAGATCGATTGGGACTTTCTCCTCGACGCTCCGTTGAGGATCCTCATCATCATCGTCATCGCCATCGTGCTCAACATGGTGATGCGGTACTTCATCCGACGCTTCTCCACTGCCGTGGCCAAAGGCACCGTCGGCAGTCAGAAGGCTGCGGAGAACGGCAAGTTCTCGGCCACGGTCATGGAATCGCAGCGGACGGGCATCGACCCGGCGACGATCCGCGAACGCCGTGCTCAGCGTGCGAAGACTGTCGGTCGGATGCTCTCGTCTGTGGCGACGATCCTCATCAGCGCCGTCGCAGTCCTCATGATCCTCGACCAGCTCAACTTCAACATCGCACCCATTCTGGCCTCGGCAGGT…	K03442
Brevibacterium linens 876_7	1	Ga0115327_10675	Ga0115327_106	79827	80502	675	-1	hypothetical protein	58482e7aea064b5890fa797f	ATGACTGAACTCGAGATCGCCGATCCGCTGGCGATGAAGGATCTGGCCGCGTTCACCTCCTTGGCACACCGGCTCGACCCTGACGGGGCTATGCGCTTGCATGTGTCATCGACCGTGCTCGTCGTCACCGTTGCGCCCCTGTATCCGCATGGCATCGGAGACTCCACACCGTTGGTCCTCGCGATGCGAATGCTGCGCCTGAGCGGACCGGAGATGGACGGCCTCGACGAGGTGGTTCCCCTGACCAACCTCAAGGACCGGTTCGCGCGCGCCGAAAATGCCACACGCCTGCCTGTGCCCCCGAACTCGGTGCTGGTGTCCTGGACCGGCATTGCCCCGCCGAAGGGACAGTGGGCTGTTCGCGACAGGATCTCCGGCAATGAGATTCGGTCCACCGCC…
Brevibacterium linens 876_7	1	Ga0115327_10676	Ga0115327_106	80498	81050	552	-1	acyl-CoA thioester hydrolase	58482e7aea064b5890fa7981	ATGGGACATATGCACAACCGCACCACGAATCCCCATCTGAACGAATTCACACGAGTCCTGTTGGAACTGAGATGGGGAGACATGGATGCCTATGGCCACGTCAACAATGTCACCCAGCTGCGTCTGCTCGAAGAGGCACGCGTCCGCGCTCTGGGCTCACCGACGCACAGCACCGATGCACCCACGACTCCGGGTCAATCGGGAATTGCCGAGACAGTTTCGGGGATCACAATTCCGTCGATCTTCGCCGAGGCTTCGGAGACCACCGAGCTGCTCGTCGCCTCGCATGCGATCGAATATCGTCGTCCCATTCCCTACCGTGCAGGTCCCATTGCCATCGATCTCGTCATCAGCGAGGTCAAACCGGCCTCTGTGACGATCGGTTACAGCATCGCCGAA…	K07107
Brevibacterium linens 876_7	1	Ga0115327_10677	Ga0115327_106	81135	82044	909	1	acyl-CoA thioesterase-2	58482e7aea064b5890fa7983	ATGAGCGATGCAGAACCCACAGCGGCCGAGGCGAATGTCGACACGCTGCGCAAAGTGCTCGAACTCGAAAGTCTGAGCTTCACCTCGGCGTCTCGGGAGAGTGACTACTTCCTCGGACAGAATCAGTACAAACCCGATGGGCGCGTCTACGGCGGTCAGGTCGTGGCGCAATCTGTGGTGGCCGCTGCCGCGACCCTGCCAGATGATCGCCTCATCCACTCACTTCACGGCTACTTCCTGCGCGCTGGGGATGTCAGCGAGCCGATTGAGTTCGGTGTCGAACGACTGCGCGACGGGCGATCTTTCTCCGCTCGACGCGTCCACGCCTATCAGAAGGACGTCCCGATCCTGTCCCTGATCGCCTCCTTCCAGGTTGAGCAGGAGGGTCTCGAACACGCA…	K10805
Brevibacterium linens 876_7	1	Ga0115327_10679	Ga0115327_106	82394	84077	1683	-1	ATP-binding cassette protein ChvD family	58482e7aea064b5890fa7987	ATGGCCGAATTCATTTACACCCTTCACAAGGCGCGTAAAGCGCACGGCGACAAAGTCATCCTCGATGACGTGTCGATGTCCTTCTACCCCGGCGCGAAGATCGGCATGGTCGGTCCCAACGGTGCCGGTAAGTCTACGATCCTCAAGATCATGGCCGGGCTCGAGCAGCCGTCCAATGGCGAGGCTCGGCTCAGCCCCGGGTACACCGTGGGCATTCTCCTGCAGGAGCCGCCCCTGAACGAGGACAAGACCGTCCTCGGCAACGTCCAAGAGGGCGTCGGCGAGATCAAGGCAAAGCTGGACCGCTTCAACGCCATCTCCGAGGAGATGGCCAGCCCTGATGCCGACTTCGATGCCCTGATGGAAGAGATGGGCAAGCTGCAAGAAGCTATCGATGCC…
Brevibacterium linens 876_7	1	Ga0115327_10680	Ga0115327_106	84143	84869	726	-1	hypothetical protein	58482e7aea064b5890fa7989	ATGCGTCTCGTTCCCCTCCTAGGTCTTGGAGCCCTGACCTTGGCTCTCTCGGGTTGTTCGCTGCTGGGATTGGGCGGAGATGATTCGTCGCCCACTCCGGCTCGCACCCCGGCGAAGCCGGTTGCAGAGGTCGACAAGGTCGTTTCCGCACTGAAACCTCTGAGCGGCAACGAAGACACGGTTCCGTCGACGAAGAAATTCTTCACAACGATGATCGATGCCGGCTACGATCCGGAGCAGCTTGAGGCTACGATCGATGACTCCCCGCTGGGCAATGACGTGCCCTCGAAGATGTTCGGCGTCAAAACGGACAAAGGGTGCGTGATCGGGGAGATACGAAAGGGAAAGGCCACCGCAGAGCTGATGCCGCCCACCGAATCGACCGGGGCATGCCTGTTC…
Brevibacterium linens 876_7	1	Ga0115327_10681	Ga0115327_106	85012	85612	600	-1	single-strand DNA-binding protein	58482e7aea064b5890fa798b	ATGTCCATCATCCCGATCAACCTCAGCGGCACAGTGGCCGCCGATCCGCAGAGCCGCACCCTGCCGTCTGGCAGAGCCTGCGCCTCCTTTCGGTTGGCCGTCAACCATTGGCGCCTCGACAAAGGAACCGGAGAGTATCTCTCCGACACGACCTCGTGGTTCAGCGTCGACTGCTACGGGCCTCTGGCCAGCAACTGCTCGATGAGTCTGCACCAAGGTATGTCCGTCGTCGTACAGGGGACCCTGAAGATTCGGGAATGGTCGACTGATGAGAAGCGGGGAATCGCTCCCACCGTTGTTGCAGAACACATCGGTCCCGATCTTCGCTACGGCACCGCCAACTATCAGAAGTCCAGTAACCCGAATCGGCAAACCGAAGGTCAGCAGCAGACGGCTGCA…	K03111
Brevibacterium linens 876_7	1	Ga0115327_10682	Ga0115327_106	85820	87401	1581	-1	50S ribosome-binding GTPase	58482e7aea064b5890fa798d	GTGAACGATCCTGCACAGTCCGAGATCAGGCGTCGAGCCGAAGGAATTCGGCAGACCCTGTCCCTGGGACCCGACAAATTGAGCGCCGAAGTTCGTACGGACGCGCAGAACCTGCTCAACCGTGCCGAGGATCGGCTCGGCCTGGGCGAGGAGTTCACCGTCGTGGCCTTCGCCGGCTCCACCGGTTCGGGAAAGTCCTCTCTGTTCAATGCCGTTGCCGGACTGGACATCGCCCGGGTCGGCGTTCGTCGGCCCACCACCTCCCGTCCCACTGCATGTGTGTGGGGCGAAGGCGGCAACGACATCCTCAATTGGCTCCATGTGCCCGAGCGCAGCAGGACCTGGCGCGAATCAGCGCTCGACGGTGATGATCAGCGCAAGCTGCACGGCCTGATTCTG…
Brevibacterium linens 876_7	1	Ga0115327_10683	Ga0115327_106	87397	89095	1698	-1	Dynamin family protein	58482e7aea064b5890fa798f	ATGACAGACAGTAAGAGTGCCGTGACGCCACCAGTGGGAGGGGCGCTGAGCGATATCGCGAAGCGAGTCTCAGAAACCCACTTCACCCTGCAGACCGACGACTTCGCCGACGGTCGCGAACTGCACCGACAGCTCTCCTCGGAGCTGACGGACTATCTGCTCCCGCGCATCAATCGGACGCAGACGCCCTTCATGATCGCGGTCGGTGGGTCAACTGGCGCAGGCAAGTCCACCTTGGTGAATTCCCTGGTCGGACGCACGGTGACTCCCGCGGGGGTGCGCCGTCCGACGACGGGCAACCCGATCGTGGTGCACAACCCTGCTGACACCAAATTCTTCGAATCGCAGTCCTTTCTCTCTGATCTGCCGCGCAGCACGGATCCGACGACGCAGACCCCC…
Brevibacterium linens 876_7	1	Ga0115327_1134	Ga0115327_113	3929	5201	1272	-1	Integrase core domain-containing protein	58482e7cea064b5890fa80e7	ATGAACACCAGAATCGAGATCACGAAGAAATACGCCACCGCGTATGCCAAGGCCGGCAGGCAACAAAAGTCGGCCATCCTCGATGCCGTCACCGACATCACTGGCTGGAACCGCGACCACGCTCGCCAACAGCTCATGCGTCGGACTCGCCAGCCCAAGGGCAGAGCCAACGCCACCGTGGCCGTGATCGATCGACGCAAGACTAAGGCCCGTAAGTACTCCTACGACGCGATCAAGATCCTGCAGTATGTGTGGTCAGTTGCCGGTGGAATCTGCGGCAAATACCTCGCCCAAGCTATGGTCGATCTCCTCAACTCCCTCGAAGCCCACAACCACCTCGTGCCTGGCCAGGGCCGCTACAGCACGAACGTACGCGACGAGCTGGTGTCGATGAGTCCA…
Brevibacterium linens 876_7	1	Ga0115327_12343	Ga0115327_123	33690	35664	1974	-1	Site-specific recombinase XerD	58482e7fea064b5890fa8a5f	ATGCAGCACGCGAACGTATCCGCACCCAGCTCCATTGATACCCGCCCAGGACTGAGCGGTGAGGATCTGTTGGCCGCCTATCTCACCCGCCTGGCCGCCACGGGCCGGGGAAACGTGGTCTATGAGCGGGCTGCGCGGAACTTCTTCCGCACCTGGCCCAACCCGCAGGCCTGGGCCGCCCAGCCACTGACCGATCGCCTCGCGGCCGACAATCAGACCCGACCGGTCATCACGTTCCTCATGCTCCACCATGGATTCCGACCTGGCTACGATTATCTACTCGAACGTAAACTGTCCTCGGTGTGGCGCGAAATCGATGGCAGCCCCCTAGAAACCGAAATTGATCGCTTCCTCACAGCTTCCGAAAACCTGGGCTTTTCGATGCGAGTGCGCCTGGCA…
Brevibacterium linens 876_7	1	Ga0115327_1301	Ga0115327_130	399	1998	1599	-1	ABC-type multidrug transport system ATPase and permease component	58482e7fea064b5890fa8c40	ATGAACACGCAGCACACCCAGACCCTTCCTGCAGCGGCTCGCCGCAGACTGGTACTCATATCACTTGGCTGGGCACTCGTCGCGCTGGCCGAGGCGACGGCCTACACCGTGCTCGCCCTTGCGATCGCAAAGCACCAGCCACCGGGAATGGTGATCGCGACTGCGGCCGTCGCCCTGTTTATCACCGTGCTCGTCTCGCGCAGCGGCTACCTCACCGGGGCAAGGCTGGCCGGAGATCTCTTCCAAGGAGTTGGCGCGGCCTTCTCCCACGCCAAACTCTCGTGGTTCACCGAGAAGAACCGAACTCTTGTCGGCACGGTCGCCGGACAATCAATCCCCGCCCTGATGAGCGTTCCCGCCCATCAGCTGCAGACGTTCATTCTCTCGCCGCTCATCCCG…
Brevibacterium linens 876_7	1	Ga0115327_1302	Ga0115327_130	1994	3602	1608	-1	ABC-type multidrug transport system ATPase and permease component	58482e80ea064b5890fa8c42	GTGCCCGCACTCAACAATGACCCTGCGGCCGCACCGGCCTCACCCATTGCGGCCGCACTGCGCCCCGCGATCCCTGTGCTTACAGCAGCGGTTACCGCCGCCGCGCTTGGTGGCCTCACGATGGTCGGAGCCTTATGGTTCACCGTGCAGGTCGTCGCTGCGGTGACACTGACGCATGCGATTTCGGCGTGTGTCTGCTGGCTCATTGGAGGCCTGCTCCTGTCCGTCTCGTCGTGGCTCGCACATCACGGGGAGGCAAGATTCTCCGCACGGCTACGGCGCGATACCGCTCGCCATCTCGCGCACATGCCGATGAGCACGGTCTCACGGTATGGCGCTGACGCGCTGCGTCGTCTGGTAGGCGAAGACATTGCCGCGCTACACCACACCGTCGCACAT…
Brevibacterium linens 876_7	1	Ga0115327_1303	Ga0115327_130	3601	4486	885	-1	iron complex transport system ATP-binding protein	58482e80ea064b5890fa8c44	ATGACACGAGTGGACACTCACCCCCTCGCCACTGCTAACACCGCCGAGTTGACCGTACCGACAAGTCGACTGTGGACGGTGAATGCCACGATCGGCTATGACAAGCGCGTCATCAACGAGAACCTGTCGGTGTCGATTCCCGATGAGTCTTTCACCGTGATCGTCGGGCCGAATGCATGCGGCAAGTCGACCCTTCTGCGCGGGCTATCCAGGCTCCTGAAACCAGGATCAGGGCGGGTGGTACTTGACGGACAAGACATCCATTCCTACAAGGCCAAAGAGGTTGCGCGCAAGTTGGGACTGCTACCGCAGACCTCGCTCGCTCCCGATGGGATCAGAGTCGCTGATCTGGTCGCTCGCGGCCGGTATCCGTACCAGAAACTGATCCGACAGTGGACA…	K02013
Brevibacterium linens 876_7	1	Ga0115327_1304	Ga0115327_130	4482	5562	1080	-1	iron complex transport system permease protein	58482e80ea064b5890fa8c46	ATGAAATCCACTATTCAAATCCCACGACAGATCGATTTCGGTTACCGGAACCGCACAATCCGTACTCAGCGCGCCGTCGCGCTGAGATTCAGCGCACGGAGCATTGCGATCAACTCGATCCTCGCCGTAGTTGCGGTGACCGTTGCGGTGATGTCCCTCGGAATCGGTGACTATCCACTGACAACTGCCCAGGTTGTCCAGTCGCTCTTCGGCCAGGGCGATGACTTCCATCGCCTGATCGTGACGGAATGGCGTCTGCCCATCGCGATCGCGGCAATCCTGTTCGGAGCGCTACTGGGGATCGGCGGTGCAATCTTCCAATCGCTGACCCGCAACCCCCTGGGATCTCCGGATGTAATCGGCTTCGACGCAGGATCGTACACGGCCGTGGTGCTCACA…	K02015
Brevibacterium linens 876_7	1	Ga0115327_1305	Ga0115327_130	5558	6617	1059	-1	iron complex transport system permease protein	58482e80ea064b5890fa8c48	ATGACTGTTTCGTTAGTAGGTGCGCGCGAGGCGTGCAGTGCGCTGGGAGAAGGGCACCTCCCAACAAGCAACCGTCGAATATCGGGTGTGATTGTGCTGCTCGCGTTGCTTGTGGTGGTTCTGGCAGCAAGCCTGTCATTCGGCGCGAACCCGTTACCCATCAGCGAGATCTGGCGGGTCGTACTCTCCCCAGATAGCTCCGAGGCAAGCTCCATTGTCTGGACATTACGAGTACCTCGCACGGTTGTGGGGATTGCTGCTGGTGTGGCATTCGGTGTTTCGGGCGCGCTCATCCAGGCGATCACACGCAACCCGCTTGCCGATCCCGGTATTCTCGGCGTAAATGCCGGAGCGGGGTTCGCCATTGTCGTTGGCGTGACGTTGTTCGGAGTCGGAGGA…	K02015
Brevibacterium linens 876_7	1	Ga0115327_1306	Ga0115327_130	6697	7762	1065	-1	iron complex transport system substrate-binding protein	58482e80ea064b5890fa8c4a	ATGAAGAAGACCAGACGCTCCCGCGTCGCTGCCAGTATCGGGGCGAGCCTCGCGACAATACTGCTCATCGCGGGCTGCTCCACGAGCCCGGACTCCAACGACAGTCCTGAAGAGCCCGGCGCAAGCGAATCAAGCCTGCTCCCTGCCGCTGAAGGCAAGACCAGTTACCCTCTGACGCTCGAATCACCGTACGGAGAGACGATCCTCGAGGAGCGCCCTGAGCGGATCGCAGCGATCGTCCCGAACGCGATCGACACCGAGTTGCTGCTTTCCTTAGGGGTCACGCCTGTGTTGACCTCGAACTTCGTAAGCGAGGGCGGCTACCTCGAAGAGCATGGGTCAGCCGAGCTGGACACCTACGAGTTCATGATGGGCGAAGACATCCCCATCGAGGCCATC…	K02016
Brevibacterium linens 876_7	1	Ga0115327_1307	Ga0115327_130	7811	8900	1089	-1	iron complex transport system substrate-binding protein	58482e80ea064b5890fa8c4c	ATGAGCCGTTCGCAAGCTAAGCCTTCTCGCATCCTCAGCAGCATCTGTGTTGTTCTCACCATTTCCTTGTTCGCTGCAAGCTGCTCGGCAAAGCCCGAATCCGATAATGCAACAAGACACCCTGAGCAAGCATCTTTACTGCCAGCGGCCGAGCAGACTACAAGCTATCCGCTGACGCTCGAATCACCGTTCGGTGAGACTGTTCTTCCGGAACGGCCTGAACGCATTGCAGCGGTCGCCCCGACAGCGATCGACACTGAGCTGCTTCTCGCCCTCGGCGTGACCCCCATTCTCACGTCAAGTCTCGTGAGTGAAGGCGGTTATCTCGACGATCATGGGGCAGCAGAAATTGAAACCTACGAGTTCGTGTCCGGTGAAGACCTTCCGATAGAAACCATC…	K02016
Brevibacterium linens 876_7	1	Ga0115327_1308	Ga0115327_130	8896	10159	1263	-1	Fucose permease	58482e80ea064b5890fa8c4e	ATGCATCCCTCACCCACGACCTATCCCACCCGCTCAGTGGTTCTCGGGCACACCAGCAATAAAGAAAGGCAGTCAATGTCAACCACCCTCGCGGCACGCCGCTTGGCGCTTTGTGCATTGTTTCTATTGCCGGGTCTGGCAATGTCGTCCTGGGTCACGCGCACACCAGCGATTCGCGATTTGCTCGGAGCCTCAACCGCGCAGATGGGTATCGTGATCTTTGGTCTATCACTAGGGGCGATGGCGGGGATTCTCTGTTCAGGGCCGCTGTTGGCTCGACTTGGCGCAAAGCCACTGATCGCATTCGGCACGTTGGGTGTAGCCGTGAGCGTGCCCCTCATAGGTCTTGGCGCGGCAGCCCAGATCGACGGATTCGTCATCGCGGCATTGGCGTTGTTC…
Brevibacterium linens 876_7	1	Ga0115327_1309	Ga0115327_130	10171	10993	822	-1	NADPH-dependent ferric siderophore reductase contains FAD-binding and SIP domains	58482e80ea064b5890fa8c50	ATGAGTGTGTCTGCACGTACGTTGCGCTTGGTTCCAGTAGCGCTGCGTGAACTTGCTGTAGGCCGCGTTGTGGACGTGACTTCGGGGATGAAGCGGATCACGCTGACGGGGAGCCAGTTGGGTGAGTTCACCTCGCCAGGGGGAGATCTGCAACCAGCTTTCACCTCACCGGGGTTCGATGACGATATTCGTTTGCTGTTTCCCTATCCAGGTGAGAGTGAGCCGGTCTTGCCTGTGATCGAAAATGGCCGCGTAACGTTCTCGGAAGGGAGGCGCCCCATCGCACGGGCGTACTCGGTGCGACGTTACGACTCGGAATCGCGTGAGCTGGATGTTGATTTCGTGCTGCATGGGCACGGGGTTGCGGCCGATTGGGCTCGGCGGGCACGACCTGGTGAC…
Brevibacterium linens 876_7	1	Ga0115327_13010	Ga0115327_130	11157	12747	1590	1	AraC-type DNA-binding protein	58482e80ea064b5890fa8c52	GTGCTGTTCGACCCACCACCGGTGCCTACCTCCCAAGCAGTGTCTGTGCACAACACACGTGACCCCTCCCTCTTATGGGTGCACGCGGGAACCGCAGAGGTTCGCGCAGCGCAACAGGAGTACCTACTCTCCTCCGGGCAGGGCATATGGTTGCCTGCCGGTATCCCCTACACCGTGGAGGTGGGCGCTGACTCAGTCGCATTCCCGATCTTCCCAGCCGCAGGAACCCGCGCGCCGAACCTCGACCGACCCCAGCGCATCAATCTCTCAAACAGCTGGTCCGAGTGGCTCATCTACCAGTTCGCGCGGAGTATCGGCTACCTTCGGGGCGCAACCTCCGACACCAGCCTCCTCGATCTGGTTGCCGGGTCTCGCTACGCGACACCTAAGGAAGAAGCG…
Brevibacterium linens 876_7	1	Ga0115327_13011	Ga0115327_130	12918	13497	579	-1	transcriptional regulator TetR family	58482e80ea064b5890fa8c54	ATGGCTGGACCAGAAAACACCAAACGAGCGCTCCTTGAGGCGGGCCGTGAGGAGTTCGCGAAGCACGGACTTGCCGGAGCTCGTACGGATAGAATCGCCGCGAATTCCGGTGTGAATAAGCAACGTATCTACGCATATTTCGGCAGCAAACAAGGCATGTTCCATGCCGTGTTATCTGACGCACTGGATTCTCTGCTCGGAATTGTCCCGTATCCCAAAGGAGACTTGCCGCCAGGAGAGTTCCTCTCCGCGTATCTACAAGCAGTCAATGCTTACCATGCCAAGCATCCGGACCTGTTGCGCCTGTTGCAATGGGAAGCACTCGAACCCGACACCGTCGAACCGGAGAGTGATTCCAGATCGGTGTACTACCAGGATAAAGTCACTTCCTTGGCACAA…
Brevibacterium linens 876_7	1	Ga0115327_13012	Ga0115327_130	13619	14813	1194	1	Predicted arabinose efflux permease MFS family	58482e80ea064b5890fa8c56	ATGCCTGCCACCCGACCAAAAATTTTGGATCGAGCGCCTCTCTCGATCACGTTCTTTGTAGTACTTGCCCTGGTGGTGCTCTCACAGCTCTACGGTGCGCTCGTGCTCGGTCCGGCTTCGGCCCTCGACCTCGGTGCTGATCCGGGCACCTCGGAATTGGTGCAGTCCCTATTCGGGGTTGCCTATGCGATTGGTTTCCTCGTCTGGGGGCCAGCGGTCGATCGTTATGGTGCGACAAGGTGCTTTCTGATCGGCCTGACCGTACTGCTTGCAGCCACTGTCTTCGTGGCTTGTGCCCCGAGCATGTCTTGGCTTCTCGGTGGCAGGATCGTGCAAGGTGCCGCCGCGGCAAGCTTCGCCCCATCGGTTTTCGCATACTTCGGTGCACGCCTGCCGACC…
Brevibacterium linens 876_7	1	Ga0115327_1431	Ga0115327_143	118	1393	1275	1	Transposase (or an inactivated derivative)	58482e80ea064b5890fa8da4	ATGGCTGACCCCAATTCTGCCGTGTCGACCCTGATCAACCAAGTCCTGACCGACCCTGACCTCGCCCACTCCGACGTGTTTAGGCAAATGCTCCAAGCTGGCCTCCAGGACCTCATCGAAGCCGAAGCCACCGCCACGATCGGTGCCGCCCGCTACGAACGCAGCGAAGACCGTTCAACACGCCGTAACGGGTCGCGGAAGAAGACCCTGGCAACTCCCTCGGGAGAAGTCGACCTGGCGATCCCGAAGCTACGGAAAGGCTCGTTCTTCCCGTCCCTGCTCAATCCCCGTCGGCGGGTCGATAAGGCCCTCTACGCCGTCATCTGCCAGGCCTGGATCGACGGAGTCTCGACGAGGAAGGTCGATGACCTTGTGCGTGCTTTGGGCAACGAGTCCGGG…
Brevibacterium linens 876_7	1	Ga0115327_1463	Ga0115327_146	961	2080	1119	1	Site-specific recombinase XerD	58482e80ea064b5890fa8dba	ATGGTCGGCGAGTTCCCTGGTTCAGCGCGGCTGATGCTGGTACCCGGGGTGGCGCATCTGAACGAGCGAGCGGCCGTGTTCGAGGCAATGGTCGCAGGCTGGACCCGGCAGCAGCTCTCGCGTCAGCTCGGCCAATCGACCTTGCGGGATCGTGAGCGGCTCATCCGGCGCTTTCAGGACTTCACCGAGCAGTATCCGTGGGAGTGGACACCGGGCGATATGGAGGACTTTACGGTGTCGCTGACGTGCGGCGCGGATCGACTCGCCGTATCGACGATTCGCGGCTACCACCTCACGTTGCGCATGTTCTGCGACTACGTCACCGATGCACGCTACGAATGGCCCGTACAATGTCAGGATCGCTTCGGCACATTCCCGGTGCAGGTGTGCAATGAATGG…
Brevibacterium linens 876_7	1	Ga0115327_1465	Ga0115327_146	2855	3890	1035	1	hypothetical protein	58482e80ea064b5890fa8dbe	ATGGCCTCTGGCGAAGTGAACATCTCCCACGACACCTTCGCCCGACGGCCGATGGATCGCGCACACAACTACCTGCGCGATCTCCTTGTCGCGCTTGAGGTCCTCGAACCCTACGAACCACTGATCGAGCGCATTGGGCCTTGGCTTATCGACCGTGTCGCGGGCATCAGCGCGATGCACCGACAGACCATCGACCAGTTCGCACGCTGGGTTATTCTCCGTCGATTGCGCACAGCCGCCGACCAGGGCAGGCTCACCAAAGCGATGGCCGAGGGCGCGCGGCAACGCCTGAACCGCTCGATCGACCTGTTGGCATGGCTCGAGCACAAACAGACGACGATCCTTGAGGTTACTCAGCACCGACTCGAGCTCTACCTCTCCACCCAAGTGATGTCAATG…
Brevibacterium linens 876_7	1	Ga0115327_1467	Ga0115327_146	4046	4604	558	-1	hypothetical protein	58482e80ea064b5890fa8dc2	GTGGGCCGAAAAGAGCGGTTGGCGTCACGCGAGCGCCTTCAGCGAATTCGACTTCTGAGTTCTGAACTCGACACGCTCCGTAACGCAGCGATCGAACGCACTCGGTCAATCGACACGAAGTCCTCGTTTGTCGTTGTCGCCGCCGGAGTGCTTGCGGGGGCAACCTTCACAGGCTTAGTCGATGCCCGATCGTGGTACCTCGGGTTAGTGCCGTTCGCGCTCACTGTCGCAACGATCATTGCCGCGGCGGTCTCGCTCTGGCCGTCGACGATTGACTCGCCTTCCGGCCGATTCCTTGTCACTCGATGGGTTAATGCTTCTGAGCGTATGGAAGCGATGGAGGACTACATCCTCGAAGTGAAGGTACGCGAAATCGAGAAACGAAACTCGAAGAATGAG…
Brevibacterium linens 876_7	1	Ga0115327_1468	Ga0115327_146	5037	5817	780	1	DNA replication protein DnaC	58482e80ea064b5890fa8dc4	ATGAGCCCCGCCACTGCTCCGGTATTGGCGGCGGACCTGACCGCCGGGCTACGCCGGCTGAAACTGGCCGCGATGCGCCAACTCGCCCCTGAGTTGCTCATCACCGCCAAGACCCAGCGGTGGAGCCCCGAGGAGGTGCTGCGAGCCCTGGTGGAGGCTGAGGTCGCCGCCCGCGATGCCTCCAACGAGCGAGCCCGGCGCAAGGCCGCCGCCTTCCCGGTGCTCCAGACGATCGAGGAGTTCGACCTGGGCGCCTCGGCGATCCCGGCACCGACGTGGGCCTACCTGAGCAGCCTGGAGTGGGTGGGGGCCAAGGAGAACTTAGCGCTGATCGGACCGGCCGGCACAGGTAAGTCCCACACCCTCATCGCCCTGGGGCACGCGGCCGTGGTCGCCGGG…
Brevibacterium linens 876_7	1	Ga0115327_14610	Ga0115327_146	6363	6969	606	-1	Threonine/homoserine/homoserine lactone efflux protein	58482e80ea064b5890fa8dc8	ATGGAGCAGTTTGCCGCAGTGGCTCTCGCACACTTTCTGGCGCTGCTCATTCCCGGGGTAGATTTCTTTCTCATCGCCCGCACCGCAATGACCAGCGGTTGGCGAAACGCCACCGGCGCGTGCCTGGGCATCGCCGCCGCGAACGGGATCTTCATCGCGGCAGCATTCTCAGGGATCTCGATCATCTCGCACCCGACCGTGCTCGTCGTGATTCAACTGGCTGGCGGTGCCTTTCTGGTGTTCATCGGAATCGCGTTTATGAGATCAACGCCCCGGCTCAGTCACGATGACGACATGACTATCGAGCAGGCCACTTGGGTGAAGAACTTCGGTCTCGGGATCGCTTCTGGCCTGCTCAACCCCAAGAACGCGCTCTTCTATCTCAGCCTCGCCACTGCG…
Brevibacterium linens 876_7	1	Ga0115327_14611	Ga0115327_146	7053	7869	816	-1	AraC-type DNA-binding protein	58482e80ea064b5890fa8dca	ATGCAAACCGAGGAAGTACTGGAGACGGAGTTCGCGCGCAGCACGACGATCCCACACGTCGAGGCGAGACGCTCCTCTCAGGAGAATTCCTGCTACCGCCCACACACGCATGACACGTTCTCGATCGGGCTCATCGATTCGGGTACCTCGGTGTTCGCTGGCCCGCTCGGCGGCAGCGTACACCTGCGCCCGGGTGATGTGATTGTCATCGCAGCCGACCAGGTGCATCAGTGCAACCCTTATGGTGGTCGGTGGGTCTATCAAATGATCCACATGGATCAGGGCTGGGCAACAGACCTCGCGCCCGACGGATCTGCACAGGCACTATTTTCTAGCATCACCGTCCTGCGCCACCCGAACCTGCACGCGAGGCTCAGCGCATGGAACAGCCGCATCTTC…
Brevibacterium linens 876_7	1	Ga0115327_14613	Ga0115327_146	8622	9123	501	-1	DNA-binding transcriptional regulator MarR family	58482e80ea064b5890fa8dce	ATGAATAAGGGTGTGGTCGTCAAACACGACTTTTTGCTGGCTCACGTTGATCACGATGAGTCTGCTCAAGTCGTGATGGCGGTGCTGTCTGCGGCGCGGCGCATCGATGACGCATGCGCCCACCTGCTGGCGCGGCATGGGCTTTCCGAGGGAAGGTTCGCAGTGTTGCTCGCGGTCAGCGAGCGTGATGACGCGAGTCCCGGGTGGATCGCCGAGCGGCTTGGGGTGACTCGCGCAACGGTCACTGGTCTTCTTGAAGGGCTGGTCAAAAGTGACTTTGTCGTGCGCATGGCCGCGCCAGGAGACCGCCGTTCGCACAACATCAAGCTCACGGAGGCTGGGGTCGCTGTTGTGAAAGAACTCGTACCCGTATACAAGGAGTGGTTGCGCCAGATCGCG…
Brevibacterium linens 876_7	1	Ga0115327_14614	Ga0115327_146	9199	9736	537	-1	Helix-turn-helix domain-containing protein	58482e80ea064b5890fa8dd0	CACTCTATGGGACTCACCCTGCTTGAACTCACTCCCAGCCTGCTCCGCCTCGCACACAAACCTGAGACTACTACGAGCGACTTTACCGTGCTCGCAGGAGCCTCGGAGGTGTTCGATGCGGTAGGAAAACTGACCGGCGTTGCCTCAGGCAGCACCGATCGTATCGGGGCGTTCCCAAGACGAGAAGTGACCATGGCAGTCGCCCTGCTACAGGCAAATCTGAATCACCCCTGGCGCGTCGATGAACTCGCTCGGGAGATTGCCCTGTCATCGTCACAGTTGACCCGGCTTTTCCGCTCGCATGTGGGTGTCGCTCCCGGGACTTTTCTTCGTCAGCTTCGGGCGGATCGGCTGGCTGAGCTTCTTGCCACGACGGACCTTTCGGTGAGCGAGGCTGCG…
Brevibacterium linens 900_6	1	Ga0115328_1101	Ga0115328_110	109	1033	924	-1	transcriptional regulator AsnC family	58482e86ea064b5890fa9d12	ATGGTGACGGAAAGCGTTTTTGCGAACTCACGCCAGATGGTGCTTCAGGCACTGCGTGATGATGGGAGAGCGAGCTTTGCCCAAATTGCCAAGAAGATCGGACTTGCGCGGCACCAAGTGGCGGCGATTGTTCAGGCAGCGGTCGCCGAAGACGTACTTCGCCTGACAGTATCGATTAGCCCGGACCTCCTGGGTCTTGAACGGTTCGCATATTTGCAGATCGCTGTCTCTGGCCCCGTACAGCCTGTTCGGGACGCACTCGTGTCGATGACGGAGTCAACATTTGTCGCCGACATCGCCGGTCACTATTCGATCGACGCTGAGGTGAGAGTGGGTCCAGATCCTCACCTACGACGAACCCTCGACGCCATTCTGCAACTGCCAGGCGTCAGCGACATC…
Brevibacterium linens 900_6	1	Ga0115328_1103	Ga0115328_110	2102	3554	1452	1	Purine-cytosine permease	58482e86ea064b5890fa9d16	ATGTCATCACAACTATCCCCGGACAACCCCGACTCGATGATTGAGTCAAGATCGATCGACGTAGTGCCCCTGGCAGAACGCCACGGAAAAGTCTGGCACCAAGGCCCGTTCTGGTTCGCCGGCAACTTCGTCTTGACAACTCTTGTGGTGGGCTTCACTGGCCCCACAATGGGGCTGAGTCTGGGATTCTCCATCCTGGCGATCGTGCTCGGGGTCGGATTCGGAACCTTCTTCATGGCGTTCCATGCCAACCAAGGGCCGACGATGGGACTGGCGCAGATGATCCAATCCCGCGCACAATTTGGCAGCCGCGGAGTGCTGCTGCCGTTCATTGCGACAGTCTTCGTCTACGTCGGATTCCTCGTCTTCGACACAATTCTCGTCACCCAGGGAATCGGA…
Brevibacterium linens 900_6	1	Ga0115328_1105	Ga0115328_110	4656	6144	1488	1	hypothetical protein	58482e86ea064b5890fa9d1a	GTGCGCCCGGGTTCCCACGCAGGCTCTCTGCCCGAACGACATTGCATGACACCACGCCGGATGACCGAGGCGGCTCCATTCACAGCCGAAGGCAGCCCACGTCAGAAAGTCCGTTTCCACATGACATCCGATCCCCAGCGCCGTCGACCGTTCCGGTCCCGGCCGAGTCGCCGTCAGCTCCTCACCGGTGCCCTGAGCGGTGCAGGCGTGCTCGGTGCCGGCTTCGTGACATCGTCGGGAACCGACATCCTCGCCGAGGTGGGCCGGAATGATCATCTTCGCTCGGTCACGGTCGCCTTCACATCGGGGACCACTCGGGAGGGTGTTGGGGCAGAAGCGGGACTGGAACTGCAGCCAGATTCCCGTGTCATGCCCGGAATCGAGGATCCGGGGCCGAAG…
Brevibacterium linens 900_6	1	Ga0115328_1106	Ga0115328_110	6404	7775	1371	1	trigger factor	58482e86ea064b5890fa9d1c	GTGAAGAGCTCCGTCGAGCAACTCGACCCCACGCGGGTCAAGATCAGCGTGGATGTCCCATACGCCGAACTCAAGCCGAGCATCGACGAGGCATACAAGACCATCGGTGGCCAGGTGACCATCCCCGGCTTCCGCCAGGGCAAGGTCCCTGCTCGAATCATCGATCAGCGCGTTGGTCGACCTGCAGTGATCCAGGAGGCCGTCAACAACGGTCTTGACGGGTTCTACCGCGAAGCCGTCGAAGAGAACGATCTCAAGCCGCTGGGCCAGCCCGAGGTTGAGATCTCAGAGGTCCCCGGCCTCGACGGCACCGAAGACGGCGACCTGACCTTCACGGTCGAGGTTGACGTTCGCCCGGCGATCGAACTGCCTGCCTACGACACCATCAGCGTCGAGGTC…	K03545
Brevibacterium linens 900_6	1	Ga0115328_1138	Ga0115328_113	7729	8404	675	-1	hypothetical protein	58482e86ea064b5890fa9f2e	ATGACTGAACTCGAGATCGCCGATCCGCTGGCGATGAAGGATCTGGCCGCGTTCACCTCCTTGGCACACCGGCTCGACCCTGACGGGGCTATGCGCTTGCATGTGTCATCGACCGTGCTCGTCGTCACCGTTGCGCCCCTGTATCCGCATGGCATCGGAGACTCCACACCGTTGGTCCTCGCGATGCGAATGCTGCGCCTGAGCGGACCGGAGATGGACGGCCTCGACGAGGTGGTTCCCCTGACCAACCTCAAGGACCGGTTCGCGCGCGCCGAAAATGCCACACGCCTGCCTGTGCCCCCGAACTCGGTGCTGGTGTCCTGGACCGGCATTGCCCCGCCGAAGGGACAGTGGGCTGTTCGCGACAGGATCTCCGGCAATGAGATTCGGTCCACCGCC…
Brevibacterium linens 900_6	1	Ga0115328_1139	Ga0115328_113	8400	8952	552	-1	acyl-CoA thioester hydrolase	58482e86ea064b5890fa9f30	ATGGGACATATGCACAACCGCACCACGAATCCCCATCTGAATGAATTCACACGAGTCCTGTTGGAACTGAGATGGGGAGACATGGATGCCTATGGCCACGTCAACAATGTCACCCAGCTGCGTCTGCTCGAAGAGGCACGCGTCCGCGCTCTGGGCTCACCGACGCACAGCACCGATGCACCCACGACTCCGGGTCATTCGGGAATTGCCGAGACAGTTTCGGGGATCACAATTCCGTCGATCTTCGCCGAGGCTTCGGAGACCACCGAGCTGCTCGTCGCCTCGCATGCGATCGAATATCGTCGTCCCATTCCCTACCGTGCAGGTCCCATTGCCATCGATCTCGTCATCAGCGAGGTCAAACCGGCCTCTGTGACGATCGGTTACAGCATCGCCGAA…	K07107
Brevibacterium linens 900_6	1	Ga0115328_11310	Ga0115328_113	9037	9946	909	1	acyl-CoA thioesterase-2	58482e86ea064b5890fa9f32	ATGAGCGATGCAGAACCCACAGCGGCCGAGGCGAATGTCGACACGCTGCGCAAAGTGCTCGAACTCGAAAGTCTGAGCTTCACCTCGGCGTCTCGGGAGAGTGACTACTTCCTCGGACAGAATCAGTACAAACCCGATGGGCGCGTCTACGGCGGTCAGGTCGTGGCGCAATCTGTGGTGGCCGCTGCCGCGACCCTGCCAGATGATCGCCTCATCCACTCACTTCACGGCTACTTCCTGCGCGCTGGGGATGTCAGCGAGCCGATTGAGTTCGGTGTCGAACGACTGCGCGACGGGCGATCTTTCTCCGCTCGACGCGTCCACGCCTATCAGAAGGACGTCCCGATCCTGTCCCTGATCGCCTCCTTCCAGGTTGAGCAGGAGGGTCTCGAACACGCA…	K10805
Brevibacterium linens 900_6	1	Ga0115328_11312	Ga0115328_113	10296	11979	1683	-1	ATP-binding cassette protein ChvD family	58482e86ea064b5890fa9f36	ATGGCCGAATTCATTTACACCCTTCACAAGGCGCGTAAAGCGCACGGCGACAAAGTCATCCTCGATGACGTGTCGATGTCCTTCTACCCCGGCGCGAAGATCGGCATGGTCGGTCCCAACGGTGCCGGTAAGTCCACGATCCTCAAGATCATGGCCGGGCTCGAGCAGCCGTCCAATGGCGAGGCTCGGCTCAGCCCCGGGTACACCGTGGGCATTCTCCTGCAGGAGCCGCCCCTGAACGAGGACAAGACCGTCCTCGGCAACGTCCAAGAGGGCGTCGGCGAGATCAAGGCAAAGCTGGACCGCTTCAACGCCATCTCCGAGGAGATGGCCAGCCCTGATGCCGACTTCGATGCCCTCATGGAAGAGATGGGCAAGCTGCAAGAAGCTATCGATGCC…
Brevibacterium linens 900_6	1	Ga0115328_11313	Ga0115328_113	12045	12771	726	-1	hypothetical protein	58482e86ea064b5890fa9f38	ATGCGTCTCGTTCCCCTCCTTGGTCTTGGAGCCCTGACCTTGGCTCTCTCGGGTTGTTCGCTGCTGGGATTGGGCGGAGATGATTCGTCGCCCACTCCGGCTCGCACCCCGGCGAAGCCGGTTGCAGAGGTCGACAAGGTCGTTTCCGCACTGAAACCTCTGACCGGCAACGAAGACACGGTTCCGTCGACGAAGAAATTCTTCACAACGATGATCGATGCCGGCTACGATCCGGAGCAGCTTGAGGCTACGATCGATGACTCCCCGCTGGGCAATGACGTGCCCTCGAAGATGTTCGGCGTCAAAACGGACAAAGGGTGCGTGATCGGGGAGATACGAAAGGGAACGGCCACCGCAGAGCTGATGCCGCCCACCGAATCGACCGGGGCATGCCTGTTC…
Brevibacterium linens 900_6	1	Ga0115328_11314	Ga0115328_113	12914	13514	600	-1	single-strand DNA-binding protein	58482e86ea064b5890fa9f3a	ATGTCCATCATCCCGATCAACCTCAGCGGCACAGTGGCCGCCGATCCGCAGAGCCGCACCCTGCCGTCTGGCAGAGCCTGCGCCTCCTTTCGGTTGGCCGTCAACCATTGGCGCCTCGACAAAGGAACCGGAGAGTATCTCTCCGACACGACCTCGTGGTTCAGCGTCGACTGCTACGGGCCTCTGGCCAGCAACTGCTCGATGAGTCTGCACCAAGGTATGTCCGTCGTCGTGCAGGGGACCCTGAAGATTCGGGAATGGTCGACTGATGAGAAGCGGGGAATCGCTCCCACCGTTGTTGCAGAACACATCGGTCCCGATCTTCGCTACGGCACCGCCAACTATCAGAAGTCCAGTAACCCGAATCGGCAAACCGAAGGTCAGCAGCAGACGGCTGCA…	K03111
Brevibacterium linens 900_6	1	Ga0115328_11315	Ga0115328_113	13722	15303	1581	-1	50S ribosome-binding GTPase	58482e86ea064b5890fa9f3c	GTGAACGATCCTGCACAGTCCGAGATCAGGCGTCGAGCCGAAGGAATTCGGCAGACCCTGTCCCTGGGACCCGACAAATTGAGCGCCGAAGTTCGTACGGACGCGCAGAACCTGCTCAACCGTGCCGAGGATCGGCTCGGCCTGGGCGAGGAGTTCACCGTCGTAGCCTTCGCCGGCTCCACCGGTTCGGGAAAGTCCTCTCTGTTCAATGCCGTTGCCGGACTGGACATCGCCCGGGTCGGCGTTCGTCGGCCCACCACCTCCCGTCCCACTGCATGTGTGTGGGGCGAAGGCGGCAACGACATCCTCAATTGGCTCCATGTGCCCGAGCGCAGCAGGACCTGGCGCGAATCAGCGCTCGACGGTGATGATCAGCGCAAGCTGCACGGCCTGATTCTG…
Brevibacterium linens 900_6	1	Ga0115328_11316	Ga0115328_113	15299	16997	1698	-1	Dynamin family protein	58482e86ea064b5890fa9f3e	ATGACAGACAGTAAGAGTGCCGTGACGCCACCAGTGGGAGGGGCGCTGAGCGATATCGCGAAGCGAGTCTCAGAAACCCGCTTCACCCTGCAGACCGACGACTTCGCCGACGGTCGCGAATTGCACCGACAGCTCTCCTCGGAGCTGACGGACTATCTGTTCCCGCGCATCAATCGGACGCAGACGCCCTTCATGATCGCGGTCGGTGGGTCAACTGGCGCAGGCAAGTCCACCTTGGTGAATTCCCTGGTCGGACGCACGGTGACTCCCGCGGGGGTGCGCCGTCCGACGACGGGCAACCCGATCGTGGTGCACAACCCTGCTGACACCAAATTCTTCGAATCGCAGTCCTTTCTCTCTGATCTGCCGCGCAGCACGGATCCGACGACGCAGACCCCC…
Brevibacterium linens 900_6	1	Ga0115328_1225	Ga0115328_122	1929	3363	1434	-1	RNA-directed DNA polymerase	58482e89ea064b5890faa75c	GTGAATACGGGTGTGTCGGGGCCAGTCGATATTACTTCGGCATGGCATCGAGTACTTACGATCCAGACGAAATTGCACCAATGGGCGCGCACCGATCCGGGGCGTGTCTTCGATGATGTGTTCAACCTTGTCCACGATCCGGCCTTCCTCGTAGCAGGGTGGGATCGAGTGCGGGGTAACAAGGGCGGTCGGACTGCTGGAGTCGATGGGGTCGCACCCCGGTCCCTGCTTCATGGTCAGGCCGTTGAGGTGCTCACTATGATTCGCCGCCAGGTGAAGACTGGTGAGTTCCGACCCTTGCCGGTGCGTGAGCGCAGGATCCCGAAGTCGAATGGGAAGACTCGTTCGTTGGGGATTCCAACGCTGGCCGACAGAGTGGTGCAGGCGTCGCTGAAGTTG…
Brevibacterium linens 900_6	1	Ga0115328_1371	Ga0115328_137	74	1349	1275	-1	Transposase (or an inactivated derivative)	58482e8aea064b5890faaaa6	ATGGCTGACCCCAATTCTGCCGTGTCGACCCTGATCAACCAAGTCCTGACCGACCCTGACCTCGCCCACTCCGACGTGTTTAGGCAAATGCTCCAAGCTGGCCTCCAGGACCTCATCGAAGCCGAAGCCACCGCCACGATCGGTGCCGCCCGCTACGAACGCAGCGAAGACCGTTCAACACGCCGTAACGGGTCGCGGAAGAAGACCCTGGCAACTCCCTCGGGAGAAGTCGACCTGGCGATCCCGAAGCTACGGAAAGGCTCGTTCTTCCCGTCCCTGCTCAATCCCCGTCGGCGGGTCGATAAGGCCCTCTACGCCGTCATCTGCCAGGCCTGGATCGACGGAGTCTCGACGAGGAAGGTCGATGACCTTGTGCGTGCTTTGGGCAACGAGTCCGGG…
Brevibacterium linens 900_6	1	Ga0115328_1461	Ga0115328_146	73	1345	1272	-1	Integrase core domain-containing protein	58482e8aea064b5890faab32	ATGAACACCAGAATCGAGATCACGAAGAAATACGCCACCGCGTATGCCAAGGCCGGCAGGCAACAAAAGTCGGCCATCCTCGATGCCGTCACCGACATCACTGGCTGGAACCGCGACCACGCTCGCCAACAGCTCATGCGTCGGACTCGCCAGCCCAAGGGCAGAGCCAACGCCACCGTGGCCGTGATCGATCGACGCAAGACTAAGGCCCGTAAGTACTCCTACGACGCGATCAAGATCCTGCAGTATGTGTGGTCAGTTGCCGGTGGAATCTGCGGCAAATACCTCGCCCAAGCTATGGTCGATCTCCTCAACTCCCTCGAAGCCCACAACCACCTCGTGCCTGGCCAGGGCCGCTACAGCACGAACGTACGCGACGAGCTGGTGTCGATGAGTCCA…
Brevibacterium linens 900_6	1	Ga0115328_1542	Ga0115328_154	1153	3127	1974	1	Site-specific recombinase XerD	58482e8aea064b5890faab75	ATGCAGCACGCGAACGTATCCGCACCCAGCTCCATTGATACCCGCCCAGGACTGAGCGGTGAGGATCTGTTGGCCGCCTATCTCACCCGCCTGGCCGCCACGGGCCGGGGAAACGTGGTCTATGAGCGGGCTGCGCGGAACTTCTTCCGCACCTGGCCCAACCCGCAGGCCTGGGCCGCCCAGCCACTGACCGATCGCCTCGCGGCCGACAATCAGACCCGACCGGTCATCACGTTCCTCATGCTCCACCATGGATTCCGACCTGGCTACGATTATCTACTCGAACGTAAACTGTCCTCGGTGTGGCGCGAAATCGATGGCAGCCCCCTAGAAACCGAAATTGATCGCTTCCTCACAGCTTCCGAAAACCTGGGCTTTTCGATGCGAGTGCGCCTGGCA…
Brevibacterium linens 908_7	1	Ga0115329_10293	Ga0115329_102	96722	97994	1272	-1	Integrase core domain-containing protein	58482e8bea064b5890faaf71	ATGAACACCAGAATCGAGATCACGAAGAAATACGCCACCGCGTATGCCAAGGCCGGCAGGCAACAAAAGTCGGCCATCCTCGATGCCGTCACCGACATCACTGGCTGGAACCGCGACCACGCTCGCCAACAGCTCATGCGTCGGACTCGCCAGCCCAAGGGCAGAGCCAACGCCACCGTGGCCGTGATCGATCGACGCAAGACTAAGGCCCGTAAGTACTCCTACGACGCGATCAAGATCCTGCAGTATGTGTGGTCAGTTGCCGGTGGAATCTGCGGCAAATACCTCGCCCAAGCTATGGTCGATCTCCTCAACTCCCTCGAAGCCCACAACCACCTCGTGCCTGGCCAGGGCCTCTACAGCACGAACGTACGCGACGAGCTGGTGTCGATGAGTCCA…
Brevibacterium linens 908_7	1	Ga0115329_106355	Ga0115329_106	378120	379818	1698	1	Dynamin family protein	58482e8eea064b5890fab705	ATGACAGACAGTAAGAGTGCCGTGACGCCACCAGTGGGAGGGGCGCTGAGCGATATCGCGAAGCGAGTCTCAGAAACCCGCTTCACCCTGCAGACCGACGACTTCGCCGACGGTCGCGAACTGCACCGACAGCTCTCCTCGGAGCTGACGGACTATCTGCTCCCGCGCATCAATCGGACGCAGACGCCCTTCATGATCGCGGTCGGTGGGTCAACTGGCGCAGGCAAGTCCACCTTGGTGAATTCCCTGGTCGGACGCACGGTGACTCCCGCGGGGGTTCGCCGTCCGACGACGGGCAACCCGATCGTGGTGCACAACCCTGCTGACACCAAATTCTTCGAATCGCAGTCCTTTCTCTCTGATCTGCCGCGCAGCACGGATCCGACGACGCAGACCCCC…
Brevibacterium linens 908_7	1	Ga0115329_106356	Ga0115329_106	379814	381395	1581	1	50S ribosome-binding GTPase	58482e8eea064b5890fab707	GTGAACGATCCTGCACAGTCCGAGATCAGGCGTCGAGCCGAAGGAATTCGGCAGACCCTGTCCCTGGGACCCGACAAATTGAGCGCCGAAGTTCGTACGGACGCGCAGAACCTGCTCAACCGTGCCGAGGATCGGCTCGGCCTGGGCGAGGAGTTCACCGTCGTGGCCTTCGCCGGCTCCACCGGTTCGGGAAAGTCCTCTCTGTTCAATGCCGTTGCCGGACTGGACATCGCCCGGGTCGGCGTTCGTCGGCCCACCACCTCCCGTCCCACTGCATGTGTGTGGGGCGAAGGCGGCAACGACATCCTCAATTGGCTCCATGTGCCCGAGCGCAGCAGGACCTGGCGCGAATCAGCGCTCGACGGTGATGATCAGCGCAAGCTGCACGGCCTGATTCTG…
Brevibacterium linens 908_7	1	Ga0115329_106357	Ga0115329_106	381603	382203	600	1	single-strand DNA-binding protein	58482e8eea064b5890fab709	ATGTCCATCATCCCGATCAACCTCAGCGGCACAGTGGCCGCCGATCCGCAGAGCCGCACCCTGCCGTCTGGCAGAGCCTGCGCCTCCTTTCGGTTGGCCGTCAACCATTGGCGCCTCGACAAAGGAACCGGAGAGTATCTCTCCGACACGACCTCGTGGTTCAGCGTCGACTGCTACGGGCCTCTGGCCAGCAACTGCTCGATGAGTCTGCACCAAGGTATGTCCGTCGTCGTACAGGGGACCCTGAAGATTCGGGAATGGTCGACTGATGAGAAGCGGGGAATCGCTCCCACCGTTGTTGCAGAACACATCGGTCCCGATCTTCGCTACGGCACCGCCAACTATCAGAAGTCCAGTAACCCGAATCGGCAAACCGAAGGTCAGCAGCAGACGGCTGCA…	K03111
Brevibacterium linens 908_7	1	Ga0115329_106358	Ga0115329_106	382346	383072	726	1	hypothetical protein	58482e8eea064b5890fab70b	ATGCGTCTCGTTCCCCTCCTAGGTCTTGGAGCCCTGACCTTGGCTCTCTCGGGTTGTTCGCTGCTGGGATTGGGCGGAGATGATTCGTCGCCCACTCCGGCTCGCACCCCGGCGAAGCCGGTTGCAGAGGTCGACAAGGTCGTTTCCGCACTGAAACCTCTGACCGGCAACGAAGACACGGTTCCGTCGACGAAGAAATTCTTCACAACGATGATCGATGCCGGCTACGATCCGGAGCAGCTTGAGGCTACGATCGATGACTCCCCGCTGGGCAATGACGTGCCCTCGAAGATGTTCGGCGTCAAAACGGACAAAGGGTGCGTGATCGGGGAGATACGAAAGGGAAAGGCCACCGCAGAGCTGATGCCGCCCACCGAATCGACCGGGGCATGCCTGTTC…
Brevibacterium linens 908_7	1	Ga0115329_106359	Ga0115329_106	383138	384821	1683	1	ATP-binding cassette protein ChvD family	58482e8eea064b5890fab70d	ATGGCCGAATTCATTTACACCCTTCACAAGGCGCGTAAAGCGCACGGCGACAAAGTCATCCTCGATGACGTGTCGATGTCCTTCTACCCCGGCGCGAAGATCGGCATGGTCGGTCCCAACGGTGCCGGTAAGTCTACGATCCTCAAGATCATGGCCGGGCTCGAGCAGCCGTCCAATGGCGAGGCTCGGCTCAGCCCCGGGTACACCGTGGGCATTCTCCTGCAGGAGCCGCCCCTGAACGAGGACAAGACCGTCCTCGGCAACGTCCAAGAGGGCGTCGGCGAGATCAAGGCAAAGCTGGACCGCTTCAACGCCATCTCCGAGGAGATGGCCAGCCCTGATGCCGACTTCGATGCCCTGATGGAAGAGATGGGCAAGCTGCAAGAAGCTATCGATGCC…
Brevibacterium linens 908_7	1	Ga0115329_106361	Ga0115329_106	385171	386080	909	-1	acyl-CoA thioesterase-2	58482e8eea064b5890fab711	ATGAGCGATGCAGAACCCACAGCGGCCGAGGCGAATGTCGACACGCTGCGCAAAGTGCTCGAACTCGAAAGTCTGAGCTTCACCTCGGCGTCTCGGGAGAGTGACTACTTCCTCGGACAGAATCAGTACAAACCCGATGGGCGCGTCTACGGCGGTCAGGTCGTGGCGCAATCTGTGGTGGCCGCTGCCGCGACCCTGCCAGATGATCGCCTCATCCACTCACTTCACGGCTACTTCCTGCGCGCTGGGGATGTCAGCGAGCCGATTGAGTTCGGTGTCGAACGACTGCGCGACGGGCGATCTTTCTCCGCTCGACGCGTCCACGCCTATCAGAAGGACGTCCCGATCCTGTCCCTGATCGCCTCCTTCCAGGTTGAGCAGGAGGGTCTCGAACACGCA…	K10805
Brevibacterium linens 908_7	1	Ga0115329_106362	Ga0115329_106	386165	386717	552	1	acyl-CoA thioester hydrolase	58482e8eea064b5890fab713	ATGGGACATATGCACAACCGCACCACGAATCCCCATCTGAACGAATTCACACGAGTCCTGTTGGAACTGAGATGGGGAGACATGGATGCCTATGGCCACGTCAACAATGTCACCCAGCTGCGTCTGCTCGAAGAGGCACGCGTCCGCGCTCTGGGCTCACCGACGCACAGCACCGATGCACCCACGACTCCGGGTCAATCGGGAATTGCCGAGACAGTTTCGGGGATCACAATTCCGTCGATCTTCGCCGAGGCTTCGGAGACCACCGAGCTGCTCGTCGCCTCGCATGCGATCGAATATCGTCGTCCCATTCCCTACCGTGCAGGTCCCATTGCCATCGATCTCGTCATCAGCGAGGTCAAACCGGCCTCTGTGACGATCGGTTACAGCATCGCCGAA…	K07107
Brevibacterium linens 908_7	1	Ga0115329_106363	Ga0115329_106	386713	387388	675	1	hypothetical protein	58482e8eea064b5890fab715	ATGACTGAACTCGAGATCGCCGATCCGCTGGCGATGAAGGATCTGGCCGCGTTCACCTCCTTGGCACACCGGCTCGACCCTGACGGGGCTATGCGCTTGCATGTGTCATCGACCGTGCTCGTCGTCACCGTTGCGTCCCTGTATCCGCATGGCATCGGAGACTCCACACCGTTGGTCCTCGCGATGCGAATGCTGCGCCTGAGCGGACCGGAGATGGACGGCCTCGACGAGGTGGTTCCCCTGACCAACCTCAAGGACCGGTTCGCGCGCGCCGAAAATGCCACACGCCTGCCTGTGCCCCCGAACTCGGTGCTGGTGTCCTGGACCGGCATTGCCCCGCCGAGGGGACAGTGGGCTGTTCGCGACAGGATCTCCGGCAATGAGATTCGGTCCACCGCC…
Brevibacterium linens 908_7	1	Ga0115329_106365	Ga0115329_106	387870	388989	1119	-1	small conductance mechanosensitive channel	58482e8eea064b5890fab719	ATGACGTTCGATGCTTTGAATACCGACCTGTTGTCCGCACCCAAGATCGATTGGGACTTTCTCCTCGACGCTCCGTTGAGGATCCTCATCATCATCGTCATCGCCATCGTGCTCAACATGGTGATGCGGTACTTCATCCGACGCTTCTCCACTGCCGTGGCCAAAGGCACCGTCGGCAGTCAGAAGGCTGCGGAGAACGGCAAGTTCTCGGCCACGGTCATGGAATCGCAGCGGACGGGCATCGACCCGGCGACGATCCGCGAACGCCGTGCTCAGCGTGCGAAGACTGTCGGTCGGATGCTCTCGTCTGTGGCGACGATCCTCATCAGCGCCGTCGCAGTCCTCATGATCCTCGACCAGCTCAACTTCAACATCGCACCCATTCTGGCCTCGGCAGGT…	K03442
Brevibacterium linens 908_7	1	Ga0115329_106366	Ga0115329_106	389001	391656	2655	-1	aminopeptidase N	58482e8eea064b5890fab71b	GTGCCCCAATACAACCTCACCCGCGAGGAAGCTCGCAGACGTTCATCACTCGTCGACGTCTCGAGCTACGAGAACACCCTGATTCTCACGGGAGTGGGTGAGAGCTTCCGAGTTCGCTCCCGCATCCGCTTCACCGCAACGCCGGAGTCCACGACCTTCATCGATGCCATCACAGCCAGCGTCGAACGCATCCGGCTCAACGGACTCGATCTCGAGACCTCCGAGGTCCTCTCCCCCTCACGCATCACTCTGCCTGGCCTTGCCGCAGAGAACGAACTCACCATCGATGCGCACTTCTCCTACATGAACACCGGTGAGGGTCTGCACCGGTTCATCGATCCCATCGACGACGAGGTCTACCTCTACTCACAGTTCGAGGTCCCCGACGCCAGACGTGTC…	K01256
Brevibacterium linens 908_7	1	Ga0115329_106367	Ga0115329_106	391802	392408	606	1	DSBA-like thioredoxin domain-containing protein	58482e8eea064b5890fab71d	ATGAGCAGAGAGACACTTGACCTGTGGTTCGACACGGCCTGCCCGTGGGCGTGGATGACGTCGCGCTGGGGTCTGGAAGTCGCCAAGGTCCGTGACATCGATGTGAAGTTCCATGTCATGAGCCTGAACATCCTCAACCGGGACAAAGACATCCCCGCCGACTATCGAGCGCTCATGGATCGTGCTCTGGCACCCATGCGCATCGTCACCGCGGCCATCGCCGAACACGGCGAGGAGATCACCGAGCCCCTATACACGGCGATCGGAACCCGCATCCACCCAGGTGGAGAGAAGGACTTCGACAAGGCCGTCGCCGAGGCGTTGGATGAGGTCGGTCTGCCAGCTGACCTGATGAAATACGGCGAACGCGATGACTACGATGCGGCGCTGCAGGAGTCC…
Brevibacterium linens 908_7	1	Ga0115329_106369	Ga0115329_106	392960	394073	1113	1	alcohol dehydrogenase	58482e8eea064b5890fab721	GTGAAGATCCGAGGTGCGGTGCTTCGCGAGATGGGGGCCGCCCGCCCCTATGCGAGAACTGAGCCGATGTCGATCGAGGAGCTCGAGCTCGATGGGCCCGGCCCCGGTGAGGTGCTCATCCGACTGAGCGCTGCCGGCGTCTGCCATTCCGACCTGTCCGTCGTCGACGGCAACCGTCCACGGCCCCTGCCGATGCTCCTCGGCCACGAAGGCGCGGGCATCGTCGAAGAACTCGGCGAAGGCGTCACCGACCTCGAGATCGGTGAGCAGGTCGTGACCGTGTTCCTGCCCCGCTGCGGCGAGTGTGCGAACTGCCGCACCGACGGCAAACTCCCGTGCACACCGGGAAGCGCCACGAATGGGGCCGGCACGCTCCCATTCGACGGACACAAGGTCCGA…
Brevibacterium linens 908_7	1	Ga0115329_106370	Ga0115329_106	394094	395321	1227	-1	Glucose/arabinose dehydrogenase beta-propeller fold	58482e8eea064b5890fab723	ATGTCGATCCGAGACCACGACAGCAGTCCCCTGAGTTCGCGTCCTTCACCCCCAGCTCTACGGCGCACCAACCCGCAGGTGGGAACATCTCCGACGACGACTCATCATCGAAGCCGCGCTGCCGGGCTCATTCTGGCGCTGGTTCTCAGCGGCTGCAGCTCCGATCGTCCACCTGCCCCCTCGGCTACCTCGTCGTCGCCCACATCAGCTGCCGGCGACACGACCGGCGAGGAACGCGGGTCCACCGCAGACCCCGAGGAGGTGGCGACGAATCTTCAGGCTCCATGGTCGATCGCCTTCTACAAGGGCACGGCGTTGGTCAGTGAGAGAGACTCCGCTCGCATCCTCGAAGTCGACGACGAACGCCCAGCACAGCCCAGAGAGGTCACGACGGTCGCC…
Brevibacterium linens 908_7	1	Ga0115329_1322	Ga0115329_132	1465	2917	1452	1	Purine-cytosine permease	58482e92ea064b5890fac6b3	ATGTCATCACAACTATCCCCGGACAACCCCGACTCGATGATTGAGTCAAGATCGATCGACGTAGTGCCCCTGGCAGAACGCCACGGAAAAGTCTGGCACCAAGGCCCGTTCTGGTTCGCCGGCAACTTCGTCTTGACAACTCTTGTGGTGGGCTTCACTGGCCCCACAATGGGGCTGAGTCTGGGATTCTCCATCCTGGCGATCGTGCTCGGGGTCGGATTCGGAACCTTCTTCATGGCGTTCCATGCCAACCAAGGGCCGACGATGGGACTGGCGCAGATGATCCAATCCCGCGCACAATTTGGCAGCCGCGGAGTGCTGCTGCCGTTCATTGCGACAGTCTTCGTCTACGTCGGATTCCTCGTCTTCGACACAATTCTCGTCACCCAGGGAATCGGA…
Brevibacterium linens 908_7	1	Ga0115329_1324	Ga0115329_132	4020	5508	1488	1	hypothetical protein	58482e92ea064b5890fac6b7	GTGCGCCCGGGTTCCCACGCAGGCTCTCTGCCCGAACGACATTGCATGACACCACGCCGGATGACCGAGGCGGCTCCATTCACAGCCGAAGGCAGCCCACGTCAGAAAGTCCGTTTCCACATGACATCCGATCCCCAGCGCCGTCGACCGTTCCGGTCCCGGCCGAGTCGCCGTCAGCTCCTCACCGGTGCCCTGAGCGGTGCAGGCGTGCTCGGTGCCGGCTTCGTGACATCGTCGGGAACCGACATCCTCGCCGAGGTGGGCCGGAATGATCATCTTCGCTCGGTCACGGTCGCCTTCACATCGGGGACCACTCGGGAGGGTGTTGGGGCAGAAGCGGGACTGGAACTGCAGCCAGATTCCCGTGTCATGCCCGGAATCGAGGATCCGGGGCCGAAG…
Brevibacterium linens 908_7	1	Ga0115329_1325	Ga0115329_132	5768	7139	1371	1	trigger factor	58482e92ea064b5890fac6b9	GTGAAGAGCTCCGTCGAGCAACTCGACCCCACGCGGGTCAAGATCAGCGTGGATGTCCCATACGCCGAACTCAAGCCGAGCATCGACGAGGCATACAAGACCATCGGTGGCCAGGTGACCATCCCCGGCTTCCGCCAGGGCAAGGTCCCTGCTCGAATCATCGATCAGCGCGTTGGTCGACCTGCAGTGATCCAGGAGGCCGTCAACAACGGTCTTGACGGGTTCTACCGCGAAGCCGTCGAAGAGAACGATCTCAAGCCGCTGGGCCAGCCCGAGGTTGAGATCTCAGAGGTCCCCGGCCTCGACGGCACCGAAGACGGCGACCTGACCTTCACGGTCGAGGTTGACGTTCGCCCGGCGATCGAACTGCCTGCCTACGACACCATCAGCGTCGAGGTC…	K03545
Brevibacterium linens 908_7	1	Ga0115329_1332	Ga0115329_133	597	1716	1119	1	Site-specific recombinase XerD	58482e92ea064b5890fac727	ATGGTCGGCGAGTTCCCTGGTTCAGCGCGGCTGATGCTGGTACCCGGGGTGGCGCATCTGAACGAGCGAGCGGCCGTGTTCGAGGCAATGGTCGCAGGCTGGACCCGGCAGCAGCTCTCGCGTCAGCTCGGCCAATCGACCTTGCGGGATCGTGAGCGGCTCATCCGGCGCTTTCAGGACTTCACCGAGCAGTATCCGTGGGAGTGGACACCGGGCGATATGGAGGACTTTACGGTGTCGCTGACGTGCGGCGCGGATCGACTCGCCGTATCGACGATTCGCGGCTACCACCTCACGTTGCGCATGTTCTGCGACTACGTCACCGATGCACGCTACGAATGGCCCGTACAATGTCAGGATCGCTTCGGCACATTCCCGGTGCAGGTGTGCAATGAATGG…
Brevibacterium linens 908_7	1	Ga0115329_1334	Ga0115329_133	2491	3526	1035	1	hypothetical protein	58482e92ea064b5890fac72b	ATGGCCTCTGGCGAAGTGAACATCTCCCACGACACCTTCGCCCGACGGCCGATGGATCGCGCACACAACTACCTGCGCGATCTCCTTGTCGCGCTTGAGGTCCTCGAACCCTACGAACCACTGATCGAGCGCATTGGGCCTTGGCTTATCGACCGTGTCGCGGGCATCAGCGCGATGCACCGACAGACCATCGACCAGTTCGCACGCTGGGTTATTCTCCGTCGATTGCGCACAGCCGCCGACCAGGGCAGGCTCACCAAAGCGATGGCCGAGGGCGCGCGGCAACGCCTGAACCGCTCGATCGACCTGTTGGCATGGCTCGAGCACAAACAGACGACGATCCTTGAGGTTACTCAGCACCGACTCGAGCTCTACCTCTCCACCCAAGTGATGTCAATG…
Brevibacterium linens 908_7	1	Ga0115329_1336	Ga0115329_133	3682	4240	558	-1	hypothetical protein	58482e92ea064b5890fac72f	GTGGGCCGAAAAGAGCGGTTGGCGTCACGCGAGCGCCTTCAGCGAATTCGACTTCTGAGTTCTGAACTCGACACGCTCCGTAACGCAGCGATCGAACGCACTCGGTCAATCGACACGAAGTCCTCGTTTGTCGTTGTCGCCGCCGGAGTGCTTGCGGGGGCAACCTTCACAGGCTTAGTCGATGCCCGATCGTGGTACCTCGGGTTAGTGCCGTTCGCGCTCACTGTCGCAACGATCATTGCCGCGGCGGTCTCGCTCTGGCCGTCGACGATTGACTCGCCTTCCGGCCGATTCCTTGTCACTCGATGGGTTAATGCTTCTGAGCGTATGGAAGCGATGGAGGACTACATCCTCGAAGTGAAGGTACGCGAAATCGAGAAACGAAACTCGAAGAATGAG…
Brevibacterium linens 908_7	1	Ga0115329_1337	Ga0115329_133	4673	5453	780	1	DNA replication protein DnaC	58482e92ea064b5890fac731	ATGAGCCCCGCCACTGCTCCGGTATTGGCGGCGGACCTGACCGCCGGGCTACGCCGGCTGAAACTGGCCGCGATGCGCCAACTCGCCCCTGAGTTGCTCATCACCGCCAAGACCCAGCGGTGGAGCCCCGAGGAGGTGCTGCGAGCCCTGGTGGAGGCTGAGGTCGCCGCCCGCGATGCCTCCAACGAGCGAGCCCGGCGCAAGGCCGCCGCCTTCCCGGTGCTCCAGACGATCGAGGAGTTCGACCTGGGCGCCTCGGCGATCCCGGCACCGACGTGGGCCTACCTGAGCAGCCTGGAGTGGGTGGGGGCCAAGGAGAACTTAGCGCTGATCGGACCGGCCGGCACAGGTAAGTCCCACACCCTCATCGCCCTGGGGCACGCGGCCGTGGTCGCCGGG…
Brevibacterium linens 908_7	1	Ga0115329_1338	Ga0115329_133	5999	6605	606	-1	Threonine/homoserine/homoserine lactone efflux protein	58482e92ea064b5890fac733	ATGGAGCAGTTTGCCGCAGTGGCTCTCGCACACTTTCTGGCGCTGCTCATTCCCGGGGTAGATTTCTTTCTCATCGCCCGCACCGCAATGACCAGCGGTTGGCGAAACGCCACCGGCGCGTGCCTGGGCATCGCCGCCGCGAACGGGATCTTCATCGCGGCAGCATTCTCAGGGATCTCGATCATCTCGCACCCGACCGTGCTCGTCGTGATTCAACTGGCTGGCGGTGCCTTTCTGGTGTTCATCGGAATCGCGTTTATGAGATCAACGCCCCGGCTCAGTCACGATGACGACATGACTATCGAGCAGGCCACTTGGGTGAAGAACTTCGGTCTCGGGATCGCTTCTGGCCTGCTCAACCCCAAGAACGCGCTCTTCTATCTCAGCCTCGCCACTGCG…
Brevibacterium linens 908_7	1	Ga0115329_1339	Ga0115329_133	6689	7505	816	-1	AraC-type DNA-binding protein	58482e92ea064b5890fac735	ATGCAAACCGAGGAAGTACTGGAGACGGAGTTCGCGCGCAGCACGACGATCCCACACGTCGAGGCGAGACGCTCCTCTCAGGAGAATTCCTGCTACCGCCCACACACGCATGACACGTTCTCGATCGGGCTCATCGATTCGGGTACCTCGGTGTTCGCTGGCCCGCTCGGCGGCAGCGTACACCTGCGCCCGGGTGATGTGATTGTCATCGCAGCCGACCAGGTGCATCAGTGCAACCCTTATGGTGGTCGGTGGGTCTATCAAATGATCCACATGGATCAGGGCTGGGCAACAGACCTCGCGCCCGACGGATCTGCACAGGCACTATTTTCTAGCATCACCGTCCTGCGCCACCCGAACCTGCACGCGAGGCTCAGCGCATGGAACAGCCGCATCTTC…
Brevibacterium linens 908_7	1	Ga0115329_13311	Ga0115329_133	8258	8831	573	-1	DNA-binding transcriptional regulator MarR family	58482e92ea064b5890fac739	ATGCCAGCAAAGCTTGGGATGTCCTTTTCCGCACAAAGAGGGCTAGTTAGCTGCCTGATAGTATGGCACTTAATGAATAAGGGTGTGGTCGTCAAACACGACTTTTTGCTGGCTCACGTTGATCACGATGAGTCTGCTCAAGTCGTGATGGCGGTGCTGTCTGCGGCGCGGCGCATCGATGACGCATGCGCCCACCTGCTGGCGCGGCATGGGCTTTCCGAGGGAAGGTTCGCAGTGTTGCTCGCGGTCAGCGAGCGTGATGACGCGAGTCCCGGGTGGATCGCCGAGCGGCTTGGGGTGACTCGCGCAACGGTCACTGGTCTTCTTGAAGGGCTGGTCAAAAGTGACTTTGTCGTGCGCATGGCCGCGCCAGGAGACCGCCGTTCGCACAACATCAAG…
Brevibacterium linens 908_7	1	Ga0115329_13312	Ga0115329_133	8835	9372	537	-1	Helix-turn-helix domain-containing protein	58482e92ea064b5890fac73b	CACTCTATGGGACTCACCCTGCTTGAACTCACTCCCAGCCTGCTCCGCCTCGCACACAAACCTGAGACTACTACGAGCGACTTTACCGTGCTCGCAGGAGCCTCGGAGGTGTTCGATGCGGTAGGAAAACTGACCGGCGTTGCCTCAGGCAGCACCGATCGTATCGGGGCGTTCCCAAGACGAGAAGTGACCATGGCAGTCGCCCTGCTACAGGCAAATCTGAATCACCCCTGGCGCGTCGATGAACTCGCTCGGGAGATTGCCCTGTCATCGTCACAGTTGACCCGGCTTTTCCGCTCGCATGTGGGTGTCGCTCCCGGGACTTTTCTTCGTCAGCTTCGGGCGGATCGGCTGGCTGAGCTTCTTGCCACGACGGACCTTTCGGTGAGCGAGGCTGCG…
Brevibacterium linens 908_7	1	Ga0115329_1421	Ga0115329_142	2	989	987	-1	RNA-directed DNA polymerase	58482e93ea064b5890fac888	GTGAATACGGGTGTGTCGGGGCCAGTCGATATTACTTCGGCATGGCATCGAGTACTTACGATCCAGACGAAATTGCACCAATGGGCGCGCACCGATCCGGGGCGTGTCTTCGATGATGTGTTCAACCTTGTCCACGATCCGGCCTTCCTCGTAGCAGGGTGGGATCGAGTGCGGGGTAACAAGGGCGGTCGGACTGCTGGAGTCGATGGGGTCGCACCCCGGTCCCTGCTTCATGGTCAGGCCGTTGAGGTGCTCACTATGATTCGCCGCCAGGTGAAGACTGGTGAGTTCCGACCCTTGCCGGTGCGTGAGCGCAGGATCCCGAAGTCGAATGGGAAGACTCGTTCGTTGGGGATTCCAACGCTGGCCGACAGAGTGGTGCAGGCGTCGCTGAAGTTG…
Brevibacterium linens 908_7	1	Ga0115329_1432	Ga0115329_143	202	1396	1194	-1	Predicted arabinose efflux permease MFS family	58482e93ea064b5890fac88e	ATGCCTGCCACCCGACCAAAAATTTTGGATCGAGCGCCTCTCTCGATCACGTTCTTTGTAGTACTTGCCCTGGTGGTGCTCTCACAGCTCTACGGTGCGCTCGTGCTCGGTCCGGCTTCGGCCCTCGACCTCGGTGCTGATCCGGGCACCTCGGAATTGGTGCAGTCCCTATTCGGGGTTGCCTATGCGATTGGTTTCCTCGTCTGGGGGCCAGCGGTCGATCGTTATGGTGCGACAAGGTGCTTTCTGATCGGCCTGACCGTACTGCTTGCAGCCACTGTCTTCGTGGCTTGTGCCCCGAGCATGTCTTGGCTTCTCGGTGGCAGGATCGTGCAAGGTGCCGCCGCGGCAAGCTTCGCCCCATCGGTTTTCGCATACTTCGGTGCACGCCTGCCGACC…
Brevibacterium linens 908_7	1	Ga0115329_1433	Ga0115329_143	1518	2097	579	1	transcriptional regulator TetR family	58482e93ea064b5890fac890	ATGGCTGGACCAGAAAACACCAAACGAGCGCTCCTTGAGGCGGGCCGTGAGGAGTTCGCGAAGCACGGACTTGCCGGAGCTCGTACGGATAGAATCGCCGCGAATTCCGGTGTGAATAAGCAACGTATCTACGCATATTTCGGCAGCAAACAAGGCATGTTCCATGCCGTGTTATCTGACGCACTGGATTCTCTGCTCGGAATTGTCCCGTATCCCAAAGGAGACTTGCCGCCAGGAGAGTTCCTCTCCGCGTATCTACAAGCAGTCAATGCTTACCATGCCAAGCATCCGGACCTGTTGCGCCTGTTGCAATGGGAAGCACTCGAACCCGACACCGTCGAACCGGAGAGTGATTCCAGATCGGTGTACTACCAGGATAAAGTCACTTCCTTGGCACAA…
Brevibacterium linens 908_7	1	Ga0115329_1434	Ga0115329_143	2268	3858	1590	-1	AraC-type DNA-binding protein	58482e93ea064b5890fac892	GTGCTGTTCGACCCACCACCGGTGCCTACCTCCCAAGCAGTGTCTGTGCACAACACACGTGACCCCTCCCTCTTATGGGTGCACGCGGGAACCGCAGAGGTTCGCGCAGCGCAACAGGAGTACCTACTCTCCTCCGGGCAGGGCATATGGTTGCCTGCCGGTATCCCCTACACCGTGGAGGTGGGCGCTGACTCAGTCGCATTCCCGATCTTCCCAGCCGCAGGAACCCGCGCGCCGAACCTCGACCGACCCCAGCGCATCAATCTCTCAAACAGCTGGTCCGAGTGGCTCATCTACCAGTTCGCGCGGAGTATCGGCTACCTTCGGGGCGCAACCTCCGACACCAGCCTCCTCGATCTGGTTGCCGGGTCTCGCTACGCGACACCTAAGGAAGAAGCG…
Brevibacterium linens 908_7	1	Ga0115329_1435	Ga0115329_143	4022	4844	822	1	NADPH-dependent ferric siderophore reductase contains FAD-binding and SIP domains	58482e93ea064b5890fac894	ATGAGTGTGTCTGCACGTACGTTGCGCTTGGTTCCAGTAGCGCTGCGTGAACTTGCTGTAGGCCGCGTTGTGGACGTGACTTCGGGGATGAAGCGGATCACGCTGACGGGGAGCCAGTTGGGTGAGTTCACCTCGCCAGGGGGAGATCTGCAACCAGCTTTCACCTCACCGGGGTTCGATGACGATATTCGTTTGCTGTTTCCCTATCCAGGTGAGAGTGAGCCGGTCTTGCCTGTGATCGAAAATGGCCGCGTAACGTTCGCGGAAGGGAGGCGCCCCATCGCACGGGCGTACTCGGTGCGACGTTACGACTCGGAATCGCGTGAGCTGGATGTTGATTTCGTGCTGCATGGGCACGGGGTTGCGGCCGATTGGGCTCGGCGGGCACGACCTGGTGAC…
Brevibacterium linens 908_7	1	Ga0115329_1436	Ga0115329_143	4856	6119	1263	1	Fucose permease	58482e93ea064b5890fac896	ATGCATCCCTCACCCACGACCTATCCCACCCGCTCAGTGGTTCTCGGGCACACCAGCAATAAAGAAAGGCAGTCAATGTCAACCACCCTCGCGGCACGCCGCTTGGCGCTTTGTGCATTGTTTCTATTGCCGGGTCTGGCAATGTCGTCCTGGGTCACGCGCACACCAGCGATTCGCGATTTGCTCGGAGCCTCAACCGCGCAGATGGGTATCGTGATCTTTGGTCTATCACTAGGGGCGATGGCGGGGATTCTCTGTTCAGGGCCGCTGTTGGCTCGACTTGGCGCAAAGCCACTGATCGCATTCGGCACGTTGGGTGTAGCCGTGAGCGTGCCCCTCATAGGTCTTGGCGCGGCAGCCCAGATCGACGGATTCGTCATCGCGGCATTGGCGTTGTTC…
Brevibacterium linens 908_7	1	Ga0115329_1437	Ga0115329_143	6115	7204	1089	1	iron complex transport system substrate-binding protein	58482e93ea064b5890fac898	ATGAGCCGTTCGCAAGCTAAGCCTTCTCGCATCCTCAGCAGCATCTGTGTTGTTCTCACCATTTCCTTGTTCGCTGCAAGCTGCTCGGCAAAGCCCGAATCCGATAATGCAACAAGACACCCTGAGCAAGCATCTTTACTGCCAGCGGCCGAGCAGACTACAAGCTATCCGCTGACGCTCGAATCACCGTTCGGTGAGACTGTTCTTCCGGAACGGCCTGAACGCATTGCAGCGGTCGCCCCGACAGCGATCGACACTGAGCTGCTTCTCGCCCTCGGCGTGACCCCCATTCTCACGTCAAGTCTCGTGAGTGAAGGCGGTTATCTCGACGATCATGGGGCAGCAGAAATTGAAACCTACGAGTTCGTGTCCGGTGAAGACCTTCCGATAGAAACCATC…	K02016
Brevibacterium linens 908_7	1	Ga0115329_1438	Ga0115329_143	7253	8318	1065	1	iron complex transport system substrate-binding protein	58482e93ea064b5890fac89a	ATGAAGAAGACCAGACGCTCCCGCGTCGCTGCCAGTATCGGGGCGAGCCTCGCGACAATACTGCTCATCGCGGGCTGCTCCACGAGCCCGGACTCCAACGACAGTCCTGAAGAGCCCGGCGCAAGCGAATCAAGCCTGCTCCCTGCCGCTGAAGGCAAGACCAGTTACCCTCTGACGCTCGAATCACCGTACGGAGAGACGATCCTCGAGGAGCGCCCTGAGCGGATCGCAGCGATCGTCCCGAACGCGATCGACACCGAGTTGCTGCTTTCCTTAGGGGTCACGCCTGTGTTGACCTCGAACTTCGTAAGCGAGGGCGGCTACCTCGAAGAGCATGGGTCAGCCGAGCTGGACACCTACGAGTTCATGATGGGCGAAGACATCCCCATCGAGGCCATC…	K02016
Brevibacterium linens 908_7	1	Ga0115329_1439	Ga0115329_143	8491	9457	966	1	iron complex transport system permease protein	58482e93ea064b5890fac89c	GTGCTGCTCGCGTTGCTTGTGGTGGTTCTGGCAGCAAGCCTGTCATTCGGCGCGAACCCGTTACCCATCAGCGAGATCTGGCGGGTCGTACTCTCCCCAGATAGCTCCGAGGCAAGCTCCATTGTCTGGACATTACGAGTACCTCGCACGGTTGTGGGGATTGCTGCTGGTGTGGCATTCGGTGTTTCGGGCGCGCTCATCCAGGCGATCACACGCAACCCGCTTGCCGATCCCGGTATTCTCGGCGTAAATGCCGGAGCGGGGTTCGCCATTGTCGTTGGCGTGACGTTGTTCGGAGTCGGAGGAATCACCGGGTACATCTGGTTTTCGTTCATCGGTGCGATCCTTGCCACGGTGCTCGTCTACCTGATCGGGTCAGCGGGACGAGGCGCCTCATCT…	K02015
Brevibacterium linens 908_7	1	Ga0115329_14310	Ga0115329_143	9453	10533	1080	1	iron complex transport system permease protein	58482e93ea064b5890fac89e	ATGAAATCCACTATTCAAATCCCACGACAGATCGATTTCGGTTACCGGAACCGCACAATCCGTACTCAGCGCGCCGTCGCGCTGAGATTCAGCGCACGGAGCATTGCGATCAACTCGATCCTCGCCGTAGTTGCGGTGACCGTTGCGGTGATGTCCCTCGGAATCGGTGACTATCCACTGACAACTGCCCAGGTTGTCCAGTCGCTCTTCGGCCAGGGCGATGACTTCCATCGCCTGATCGTGACGGAATGGCGTCTGCCCATCGCGATCGCGGCAATCCTGTTCGGAGCGCTACTGGGGATCGGCGGTGCAATCTTCCAATCGCTGACCCGCAACCCCCTGGGATCTCCGGATGTAATCGGCTTCGACGCAGGATCGTACACGGCCGTGGTGCTCACA…	K02015
Brevibacterium linens 908_7	1	Ga0115329_14311	Ga0115329_143	10529	11414	885	1	iron complex transport system ATP-binding protein	58482e93ea064b5890fac8a0	ATGACACGAGTGGACACTCACCCCCTCGCCACTGCTAACACCGCCGAGTTGACCGTACCGACAAGTCGACTGTGGACGGTGAATGCCACGATCGGCTATGACAAGCGCGTCATCAACGAGAACCTGTCGGTGTCGATTCCCGATGAGTCTTTCACCGTGATCGTCGGGCCGAATGCATGCGGCAAGTCGACCCTTCTGCGCGGGCTATCCAGGCTCCTGAAACCAGGATCAGGGCGGGTGGTACTTGACGGACAAGACATCCATTCCTACAAGGCCAAAGAGGTTGCGCGCAAGTTGGGACTGCTACCGCAGACCTCGCTCGCTCCCGATGGGATCAGAGTCGCTGATCTGGTCGCTCGCGGCCGGTATCCGTACCAGAAACTGATCCGACAGTGGACA…	K02013
Brevibacterium linens 908_7	1	Ga0115329_14312	Ga0115329_143	11413	13021	1608	1	ABC-type multidrug transport system ATPase and permease component	58482e93ea064b5890fac8a2	GTGCCCGCACTCAACAATGACCCTGCGGCCGCACCGGCCTCACCCATTGCGGCCGCACTGCGCCCCGCGATCCCTGTGCTTACAGCAGCGGTTACCGCCGCCGCGCTTGGTGGCCTCACGATGGTCGGAGCCTTATGGTTCACCGTGCAGGTCGTCGCTGCGGTGACACTGACGCATGCGATTTCGGCGTGTGTCTGCTGGCTCATTGGAGGCCTGCTCCTGTCCGTCTCGTCGTGGCTCGCACATCACGGGGAGGCAAGATTCTCCGCACGGCTACGGCGCGATACCGCTCGCCATCTCGCGCACATGCCGATGAGCACGGTCTCACGGTATGGCGCTGACGCGCTGCGTCGTCTGGTAGGCGAAGACATTGCCGCGCTACACCACACCGTCGCACAT…
Brevibacterium linens 908_7	1	Ga0115329_14313	Ga0115329_143	13017	14616	1599	1	ABC-type multidrug transport system ATPase and permease component	58482e93ea064b5890fac8a4	ATGAACACGCAGCACACCCAGACCCTTCCTGCAGCGGCTCGCCGCAGACTGGTACTCATATCACTTGGCTGGGCACTCGTCGCGCTGGCCGAGGCGACGGCCTACACCGTGCTCGCCCTTGCGATCGCAAAGCACCAGCCACCGGGAATGGTGATCGCGACTGCGGCCGTCGCCCTGTTTATCACCGTGCTCGTCTCGCGCAGCGGCTACCTCACCGGGGCAAGGCTGGCCGGAGATCTCTTCCAAGGAGTTGGCGCGGCCTTCTCCCACGCCAAACTCTCGTGGTTCACCGAGAAGAACCGAACTCTTGTCGGCACGGTCGCCGGACAATCAATCCCCGCCCTGATGAGCGTTCCCGCCCATCAGCTGCAGACGTTCATTCTCTCGCCGCTCATCCCG…
Brevibacterium linens 908_7	1	Ga0115329_1511	Ga0115329_151	25	1300	1275	-1	Transposase (or an inactivated derivative)	58482e93ea064b5890fac908	ATGGCTGACCCCAATTCTGCCGTGTCGACCCTGATCAACCAAGTCCTGACCGACCCTGACCTCGCCCACTCCGACGTGTTTAGGCAAATGCTCCAAGCTGGCCTCCAGGACCTCATCGAAGCCGAAGCCACCGCCACGATCGGTGCCGCCCGCTACGAACGCAGCGAAGACCGTTCAACACGCCGTAACGGGTCGCGGAAGAAGACCCTGGCAACTCCCTCGGGAGAAGTCGACCTGGCGATCCCGAAGCTACGGAAAGGCTCGTTCTTCCCGTCCCTGCTCAATCCCCGTCGGCGGGTCGATAAGGCCCTCTACGCCGTCATCTGCCAGGCCTGGATCGACGGAGTCTCGACGAGGAAGGTCGATGACCTTGTGCGTGCTTTGGGCAACGAGTCCGGG…
Brevibacterium linens 908_7	1	Ga0115329_1523	Ga0115329_152	2560	3133	573	-1	DNA-binding transcriptional regulator Lrp family	58482e93ea064b5890fac910	CACTCTATGGGACTCACCCTTCTGCAACTGCCAGGCGTCAGCGACATCCGCACCACACTCTATGAATCTATTGAAATCAATCGATTCTCCCCGTTCCACACAGCCAAAGCCCCGCTGACGCTCGACGAGGCCGACCGGTCCCTCATTATGCATCTGCAAAGGGACGCCCGATCGTCCTATCGAGAGCTCGGCGAGGCGTCGGGTTTGTCGCCGAGCGGCGCGCGACTACGATTCGAACGGCTTGTTAGAAGCGGAGCGATCAAGGTCGTCGGCATACCAGTTCGCATCGGACAGCCCGACACTCCCACTTTGGGCCTGGGAATCCGAGCGGGAGTGCCTGTCAACGAACTGCTGCCAAGGATCAAAGCTCTCGACCCAGAATTTCTCGCCGTCGCCATC…
Brevibacterium linens 947_7	1	Ga0115330_108189	Ga0115330_108	203617	204502	885	1	Transposase InsO and inactivated derivatives	58482e95ea064b5890fad226	ATGATGTACCCGCTGGTCCTTGACCTTGCTGCCACCGGGGTGCCGGTGGCAGTGACCTGTCGGGTGCTCGGCTTTACCAAGCAGGGGTTCTACAAGTGGTGCGCTCATCCGGTCTCAGCTCGGGACTGGGACGAGGCACATCTGATCAATGCCGCCTACGACGTTCATACGGACGATCCTGAGTTCGGGCACCGGTTCATCGCCGATGAACTCCACGCCGCGGGTCTGCAGACGTCAGAGCGTCGTGTGTGGCGATTGTGCTCGCAGCAGCAGTTGTTCTCGCACACGATCAAACGAGCCCGGAAACACGGCAAGAAGCCCGGCCCGCCAGTGTGTGACGACCTCGTCGAACGCGACTTCACTGCCAAGGCAATCAACGAGTTGTGGCTGACCGACGTT…
Brevibacterium linens 947_7	1	Ga0115330_11451	Ga0115330_114	48609	50307	1698	1	Dynamin family protein	58482e97ea064b5890fad7a6	ATGACAGACAGTAAGAGTGCCGTGACGCCACCAGTGGGAGGGGCGCTGAGCGATATCGCGAAGCGAGTCTCAGAAACCCGCTTCACCCTGCAGACCGACGACTTCGCCGACGGTCGCGAACTGCACCGACAACTCTCCTCGGAGCTGACGGACTATCTGCTCCCGCGCATCAATCGGACGCAGACGCCCTTCATGATCGCGGTCGGTGGGTCAACTGGCGCAGGCAAGTCCACCTTGGTGAATTCCCTGGTCGGACGCACGGTGACTCCCGCGGGGGTGCGCCGTCCGACGACGGGCAACCCGATCGTGGTGCACAACCCTGCTGACACCAAATTCTTCGAATCGCAGTCCTTTCTCTCTGATCTGCCGCGCAGCACGGATCCGACGACGCAGACCCCC…
Brevibacterium linens 947_7	1	Ga0115330_11452	Ga0115330_114	50303	51884	1581	1	50S ribosome-binding GTPase	58482e97ea064b5890fad7a8	GTGAACGATCCTGCACAGTCCGAGATCAGGCGTCGAGCCGAAGGAATTCGGCAGACCCTGTCCCTGGGACCCGACAAATTGAGCGCCGAAGTTCGTACGGACGCGCAGAACCTGCTCAACCGTGCCGAGGATCGGCTCGGCCTGGGCGAGGAGTTCACCGTCGTGGCCTTCGCCGGCTCCACCGGTTCGGGAAAGTCCTCTCTGTTCAATGCCGTTGCCGGACTGGACATCGCCCGGGTCGGCGTTCGTCGGCCCACCACCTCCCGTCCCACTGCATGTGTGTGGGGCGAAGGCGGCAACGACATCCTCAATTGGCTCCATGTGCCCGAGCGCAGCAGGACCTGGCGCGAATCAGCGCTCGACGGTGATGATCAGCGCAAGCTGCACGGCCTGATTCTG…
Brevibacterium linens 947_7	1	Ga0115330_11453	Ga0115330_114	52092	52692	600	1	single-strand DNA-binding protein	58482e97ea064b5890fad7aa	ATGTCCATCATCCCGATCAACCTCAGCGGCACAGTGGCCGCCGATCCGCAGAGCCGCACCCTGCCGTCTGGCAGAGCCTGCGCCTCCTTTCGGTTGGCCGTCAACCATTGGCGCCTCGACAAAGGAACCGGAGAGTATCTCTCCGACACGACCTCGTGGTTCAGCGTCGACTGCTACGGGCCTCTGGCCAGCAACTGCTCGATGAGTCTGCACCAAGGTATGTCCGTCGTCGTACAGGGGACCCTGAAGATTCGGGAATGGTCGACTGATGAGAAGCGGGGAATCGCTCCCACCGTTGTTGCAGAACACATCGGTCCCGATCTTCGCTACGGCACCGCCAACTATCAGAAGTCCAGTAACCCGAATCGGCAAACCGAAGGTCAGCAGCAGACGGCTGCA…	K03111
Brevibacterium linens 947_7	1	Ga0115330_11454	Ga0115330_114	52835	53561	726	1	hypothetical protein	58482e97ea064b5890fad7ac	ATGCGTCTCGTTCCCCTCCTAGGTCTTGGAGCCCTGACCTTGGCTCTCTCGGGTTGTTCGCTGCTGGGATTGGGCGGAGATGATTCGTCGCCCACTCCGGCTCGCACCCCGGCGAAGCCGGTTGCAGAGGTCGACAAGGTCGTTTCCGCACTGAAACCTCTGACCGGCAACGAAGACACGGTTCCGTCGACGAAGAAATTCTTCACAACGATGATCGATGCCGGCTACGATCCGGAGCAGCTTGAGGCTACGATCGATGACTCCCCGCTGGGCAATGACGTGCCCTCGAAGATGTTCGGCGTCAAAACGGACAAAGGGTGCGTGATCGGGGAGATACGAAAGGGAAAGGCCACCGCAGAGCTGATGCCGCCCACCGAATCGACCGGGGCATGCCTGTTC…
Brevibacterium linens 947_7	1	Ga0115330_11455	Ga0115330_114	53627	55310	1683	1	ATP-binding cassette protein ChvD family	58482e97ea064b5890fad7ae	ATGGCCGAATTCATTTACACCCTTCACAAGGCGCGTAAAGCGCACGGCGACAAAGTCATCCTCGATGACGTGTCGATGTCCTTCTACCCCGGCGCGAAGATCGGCATGGTCGGTCCCAACGGTGCCGGTAAGTCTACGATCCTCAAGATCATGGCCGGGCTCGAGCAGCCGTCCAATGGCGAGGCTCGGCTCAGCCCCGGGTACACCGTGGGCATTCTCCTGCAGGAGCCGCCCCTGAACGAGGACAAGACCGTCCTCGGCAACGTCCAAGAGGGCGTCGGCGAGATCAAGGCAAAGCTGGACCGCTTCAACGCCATCTCCGAGGAGATGGCCAGCCCTGATGCCGACTTCGATGCCCTGATGGAAGAGATGGGCAAGCTGCAAGAAGCTATCGATGCC…
Brevibacterium linens 947_7	1	Ga0115330_11457	Ga0115330_114	55660	56569	909	-1	acyl-CoA thioesterase-2	58482e97ea064b5890fad7b2	ATGAGCGATGCAGAACCCACAGCGGCCGAGGCGAATGTCGACACGCTGCGCAAAGTGCTCGAACTCGAAAGTCTGAGCTTCACCTCGGCGTCTCGGGAGAGTGACTACTTCCTCGGACAGAATCAGTACAAACCCGATGGGCGCGTCTACGGCGGTCAGGTCGTGGCGCAATCTGTGGTGGCCGCTGCCGCGACCCTGCCAGATGATCGCCTCATCCACTCACTTCACGGCTACTTCCTGCGCGCTGGGGATGTCAGCGAGCCGATTGAGTTCGGTGTCGAACGACTGCGCGACGGGCGATCTTTCTCCGCTCGACGCGTCCACGCCTATCAGAAGGACGTCCCGATCCTGTCCCTGATCGCCTCCTTCCAGGTTGAGCAGGAGGGTCTCGAACACGCA…	K10805
Brevibacterium linens 947_7	1	Ga0115330_11458	Ga0115330_114	56654	57206	552	1	acyl-CoA thioester hydrolase	58482e97ea064b5890fad7b4	ATGGGACATATGCACAACCGCACCACGAATCCCCATCTGAACGAATTCACACGAGTCCTGTTGGAACTGAGATGGGGAGACATGGATGCCTATGGCCACGTCAACAATGTCACCCAGCTGCGTCTGCTCGAAGAGGCACGCGTCCGCGCTCTGGGCTCACCGACGCACAGCACCGATGCACCCACGACTCCGGGTCAATCGGGAATTGCCGAGACAGTTTCGGGGATCACAATTCCGTCGATCTTCGCCGAGGCTTCGGAGACCACCGAGCTGCTCGTCGCCTCGCATGCGATCGAATATCGTCGTCCCATTCCCTACCGTGCAGGTCCCATTGCCATCGATCTCGTCATCAGCGAGGTCAAACCGGCCTCTGTGACGATCGGTTACAGCATCGCCGAA…	K07107
Brevibacterium linens 947_7	1	Ga0115330_11459	Ga0115330_114	57202	57877	675	1	hypothetical protein	58482e97ea064b5890fad7b6	ATGACTGAACTCGAGATCGCCGATCCGCTGGCGATGAAGGATCTGGCCGCGTTCACCTCCTTGGCACACCGGCTCGACCCTGACGGGGCTATGCGCTTGCATGTGTCATCGACCGTGCTCGTCGTCACCGTTGCGCCCCTGTATCCGCATGGTATCGGAGACTCCACACCGTTGGTCCTCGCGATGCGAATGCTGCGCCTGAGCGGACCGGAGATGGACGGCCTCGACGAGGTGGTTCCCCTGACCAACCTCAAGGACCGGTTCGCGCGCGCCGAAAATGCCACACGCCTGCCTGTGCCCCCGAACTCGGTGCTGGTGTCCTGGACCGGCATTGCCCCGCCGAAGGGACAGTGGGCTGTTCGCGACAGGATCTCCGGCAATGAGATTCGGTCCACCGCC…
Brevibacterium linens 947_7	1	Ga0115330_11461	Ga0115330_114	58359	59478	1119	-1	small conductance mechanosensitive channel	58482e97ea064b5890fad7ba	ATGACTTTCGATGCTTTGAATACCGACCTGTTGTCCGCACCCAAGATCGATTGGGACTTTCTCCTCGACGCTCCGTTGAGGATCCTCATCATCATCGTCATCGCCATCGTGCTCAACATGGTGATGCGGTACTTCATCCGACGCTTCTCCACTGCCGTGGCCAAAGGCACCGTCGGCAGTCAGAAGGCTGCGGAGAACGGCAAGTTCTCGGCCACGGTCATGGAATCGCAGCGGACGGGCATCGACCCGGCGACGATCCGCGAACGCCGTGCTCAGCGTGCGAAGACTGTCGGTCGGATGCTCTCGTCTGTGGCGACGATCCTCATCAGCGCCGTCGCAGTCCTCATGATCCTCGACCAGCTCAACTTCAACATCGCACCCATTCTGGCCTCGGCAGGT…	K03442
Brevibacterium linens 947_7	1	Ga0115330_11462	Ga0115330_114	59490	62145	2655	-1	aminopeptidase N	58482e97ea064b5890fad7bc	GTGCCCCAATACAACCTCACCCGCGAGGAAGCTCGCAGACGTTCATCACTCGTCGACGTCTCGAGCTACGAGAACACCCTGATTCTCACGGGAGTGGGTGAGAGCTTCCGAGTTCGCTCCCGCATCCGCTTCACCGCAACGCCGGAGTCCACGACCTTCATCGATGCCATCACAGCCAGCGTCGAACGCATCCGGCTCAACGGACTCGATCTCGAGACCTCCGAGGTCGTCTCCCCCTCACGCATCACTCTGCCTGGCCTTGCCGCAGAGAACGAACTCACCATCGATGCGCACTTCTCCTACATGAACACCGGTGAGGGTCTGCACCGGTTCATCGATCCCATCGACGACGAGGTCTACCTCTACTCACAGTTCGAGGTCCCCGACGCCAGACGTGTC…	K01256
Brevibacterium linens 947_7	1	Ga0115330_11463	Ga0115330_114	62291	62897	606	1	DSBA-like thioredoxin domain-containing protein	58482e97ea064b5890fad7be	ATGAGCAGAGAGACACTTGACCTGTGGTTCGACACGGCCTGCCCGTGGGCGTGGATGACGTCGCGCTGGGGTCTGGAAGTCGCCAAGGTCCGTGACATCGATGTGAAGTTCCATGTCATGAGCCTGAACATCCTCAACCGGGACAAAGACATCCCCGCCGACTATCGAGCGCTCATGGATCGTGCTCTGGCACCCATGCGCATCGTCACCGCGGCCATCGCCGAACACGGCGAGGAGATCACCGAGCCCCTATACACGGCGATCGGAACCCGCATCCACCCAGGTGGAGAGAAGGACTTCGACAAGGCCGTCGCCGAGGCGTTGGATGAGGTCGGTCTGCCGGCTGACCTGATGAAATACGGCGAACGCGATGACTACGATGCGGCGCTGCAGGAGTCC…
Brevibacterium linens 947_7	1	Ga0115330_11465	Ga0115330_114	63449	64562	1113	1	alcohol dehydrogenase	58482e97ea064b5890fad7c2	GTGAAGGTCCGAGGTGCGGTGCTTCGCGAGATGGGGGCCGCCCGCCCCTATGCGAGAACTGAGCCGATGTCGATCGAGGAGCTCGAGCTCGATGGGCCCGGCCCCGGTGAGGTGCTCATCCGACTGAGCGCTGCCGGCGTCTGCCATTCCGACCTGTCCGTCGTCGACGGCAACCGTCCACGGCCCCTGCCGATGCTCCTCGGCCACGAAGGCGCGGGCATCGTCGAAGAACTCGGCGAAGGCGTCACCGACCTCGAGATCGGTGAGCAGGTCGTGACCGTGTTCCTGCCCCGCTGCGGCGAGTGTGCGAACTGCCGCACCGACGGCAAACTCCCGTGCACACCGGGAAGCGCCACGAATGGGGCCGGCACGCTCCCATTCGACGGACACAAGGTCCGA…
Brevibacterium linens 947_7	1	Ga0115330_11466	Ga0115330_114	64583	65549	966	-1	Glucose/arabinose dehydrogenase beta-propeller fold	58482e97ea064b5890fad7c4	GTGGCGACGAATCTTCAGGCTCCATGGTCGATCGCCTTCTACAAGGGCACGGCGTTGGTCAGTGAGAGAGACTCCGCTCGCATCCTCGAAGTCGACGACGAACGCCCAGCACAGCCCAGAGAGGTCACGACGGTCGCCGGCGTGTCCGCCTCTGGTGAGGGCGGGCTCTTGGGTCTGAGCGTGCGTGGGGACAGTCTCTTCGCGTACTTCACCGCCGAGTCGGACAACCGGATCCAACGGTTCCCCCTCAGGACAGGCTCGGACGGGGTTGAGCTCGGCTCACCGGAGACGATCGTCGACGGCATCGCGAAGGCCGGCTTCCATAATGGTGGGCGTCTGGCGTTCGGTCCCGACGGAATGCTCTATGCCACGGTCGGTGACGCAGGGAATCAGGACTCC…
Brevibacterium linens 947_7	1	Ga0115330_11470	Ga0115330_114	66469	67912	1443	1	hypothetical protein	58482e97ea064b5890fad7cc	ATGACACCACGCCGGATGACCGAGGCGGCTCCATTCACAGCCGAAGGCAGCCCACGTCAGAAAGTCCGTTTCCACATGACATCCGATCCCCAGCGCCGTCGACCGTTCCGGTCCCGGCCGAGTCGCCGTCAGCTCCTCACCGGTGCCCTGAGCGGTGCAGGCGTGCTCGGTGCCGGCTTCGTGACATCGTCGGGAACCGACATCCTCGCCGAGGTGGGCCGGAATGATCATCTTCGCTCGGTCACGGTCGCCTTCACATTGGGGACCACTCGGGAGGGTGTTGGGGCAGAAGCGGGACTGGAACTGCAGCCAGATTCCCGTGTCATGCCCGGAATCGAGGATCCGGGGCCGAAGCAGCGGCAGAGGGAATTCCTCGATCGGTGCTCGTCGTGGCTATCG…
Brevibacterium linens 947_7	1	Ga0115330_11471	Ga0115330_114	68172	69522	1350	1	trigger factor	58482e97ea064b5890fad7ce	GTGAAGAGCTCCGTCGAGCAACTCGACCCCACGCGGGTCAAGATCAGCGTGGATGTCCCATACGCCGAACTCAAGCCGAGCATCGACGAGGCATACAAGACCATCGGTGGCCAGGTGACCATCCCCGGCTTCCGCCAGGGCAAGGTCCCTGCTCGAATCATCGATCAGCGCGTTGGTCGACCTGCAGTGATCCAGGAGGCCGTCAACAACGGTCTTGACGGGTTCTACCGCGAAGCCGTCGAAGAGAACGATCTCAAGCCGCTGGGCCAGCCCGAGGTTGAGATCTCAGAGGTCCCCGGCCTCGACGGCACCGAAGACGGCGACCTGACCTTCACGGTCGAGGTTGACGTTCGCCCGGCGATCGAACTGCCTGCCTACGACACCATCAGCGTCGAGGTC…	K03545
Brevibacterium linens 947_7	1	Ga0115330_1261	Ga0115330_126	0	1089	1089	1	Phage integrase family protein	58482e9dea064b5890fae1f1	CGCAACCGCCGCGTCGTCGCGGTCACGACGTTTCTCACCGACATCACCGAGTGGGGCTGGGACGTCGCCCCGGCCCGGAAAGTCATCTTCCGCGATGACATCCCCAAACTCCCACAAGTCCTCCCACGCTACCTGCCCATCGACGCCGACCGCCGCCTCCAAGAGGCGCTGACCGACCATCCCACCAACGAGCTGGCCGCACTGGCCCTGCGGGTCCAACGTGCCTGCGGGCTACGCATCGGTGAACTACTAGACCTGGAACTGGACTGCGTCCACGAGATCGATGGCAACGGTGCCTGGCTGAAGATCCCGCTGGGCAAAATGGCCACCGAACGCATGGTCCCCCTCGATGTCGAGACTCTCGACCTCATCGACCGGATCACCCAGATCCGCTCCCAC…
Brevibacterium linens 947_7	1	Ga0115330_12915	Ga0115330_129	20100	21102	1002	1	Transposase InsO and inactivated derivatives	58482e9eea064b5890fae391	GTGTTCGACCTCGTCGAGTCTGGCCTGTCACAGCGCCGAGTTCTTGACGTCGTGGGCCTGTCACGGTCTACGTGGCATTACCGGCTCAACCCGCGCCAGACTACGGCTGAGCCGGTGGCGCATCGGGACCGGGCCTATCCGAACCGCATCGATGCTGAAGCGAAACAGCAGATTAAGACACTCATCGAAGCAGGGTGGGCCGATGATCACTCGGTTGATCATGCATTCGCGCGGGCCTGGGACGACGGGATCATGGTCGCGTCCCAACGCACATGGTGGCGCATCGCTGCCGATCTGGAGGATCAGACCAAACGGCCGCAGGTCGCCACGCGCAAGGGCACAAGGCAGCCCCGTGAGATACCGGTGCTGGTGGCGACCAAGCCGGGGCAAGTGTGGTCA…
Brevibacterium linens 947_7	1	Ga0115330_1441	Ga0115330_144	74	1262	1188	-1	Transposase (or an inactivated derivative)	58482e9eea064b5890fae6b2	ATGCTCCAAGCTGGCCTCCAGGACCTCATCGAAGCCGAAGCCACCGCCACGATCGGTGCCGCCCGCTACGAACGCAGCGAAGACCGTTCAACACGCCGTAACGGGTCGCGGAAGAAGACCCTGGCAACTCCCTCGGGAGAAGTCGACCTGGCGATCCCGAAGCTACGGAAAGGCTCGTTCTTCCCGTCCCTGCTCAATCCCCGTCGGCGGGTCGATAAGGCCCTCTACGCCGTCATCTGCCAGGCCTGGATCGACGGAGTCTCGACGAGGAAGGTCGATGACCTTGTGCGTGCTTTGGGCAACGAGTCCGGGATCTCTCGGTCGACGGTGTCGCGGATCTGTGCCGACATCGACGAGGCAGTGGCCGAGTTCCTGGCCCGTCGACTCGATCACACGTGG…
Brevibacterium linens 947_7	1	Ga0115330_1501	Ga0115330_150	80	1514	1434	1	RNA-directed DNA polymerase	58482e9eea064b5890fae6d6	GTGAATACGGGTGTGTCGGGGCCAGTCGATATTACTTCGGCATGGCATCGAGTACTTACGATCCAGACGAAATTGCACCAATGGGCGCGCACCGATCCGGGGCGTGTCTTCGATGATGTGTTCAACCTTGTCCACGATCCGGCCTTCCTCGTAGCAGGGTGGGATCGAGTGCGGGGTAACAAGGGCGGTCGGACTGCTGGAGTCGATGGGGTCGCACCCCGGTCCCTGCTTCATGGTCAGGCCGTTGAGGTGCTCACTATGATTCGCCGCCAGGTGAAGACTGGTGAGTTCCGACCCTTGCCGGTGCGTGAGCGCAGGATCCCGAAGTCGAATGGGAAGACTCGTTCGTTGGGGATTCCAACGCTGGCCGACAGAGTGGTGCAGGCGTCGCTGAAGTTG…
Brevibacterium linens 947_7	1	Ga0115330_1504	Ga0115330_150	3034	3940	906	1	hypothetical protein	58482e9eea064b5890fae6dc	ATGCAGCACGCGAACGTATCCGCACCCAGCTCCATTGATACCCGCCCAGGACTGAGCGGTGAGGATCTGTTGGCCGCCTATCTCACCCGCCTGGCCGCCACGGGCCGGGGAAACGTGGTCTATGAGCGGGCTGCGCGGAACTTCTTCCGCACCTGGCCCAACCCGCAGGCCTGGGCCGCCCAGCCACTGACCGATCCCCTCGCGGCCGACAATCAGACCCGACCGGTCATCACGTTCCTCATGCTCCACCATGGATTCCGACCTGGCTACGATTATCTACTCGAACGTAAACTGTCCTCGGTGTGGCGCGAAATCGATGGCAGCCCCCTAGAAACCGAAATTGATCGCTTCCTCACAGCTTCCGAAAACCTGGGCTTTTCGATGCGAGTGCGCCTGGCA…
Brevibacterium linens 947_7	1	Ga0115330_1531	Ga0115330_153	38	1310	1272	-1	Integrase core domain-containing protein	58482e9eea064b5890fae6f8	ATGAACACCAGAATCGAGATCACGAAGAAATACGCCACCGCGTATGCCAAGGCCGGCAGGCAACAAAAGTCGGCCATCCTCGATGCCGTCACCGACATCACTGGCTGGAACCGCGACCACGCTCGCCAACAGCTCATGCGTCGGACTCGCCAGCCCAAGGGCAGAGCCAACGCCACCGTGGCCGTGATCGATCGACGCAAGACTAAGGCCCGTAAGTACTCCTACGACGCGATCAAGATCCTGCAGTATGTGTGGTCAGTTGCCGGTGGAATCTGCGGCAAATACCTCGCCCAAGCTATGGTCGATCTCCTCAACTCCCTCGAAGCCCACAACCACCTCGTGCCTGGCCAGGGCCGCTACAGCACGAACGTACGCGACGAGCTGGTGTCGATGAGTCCA…
Brevibacterium linens 962_8	1	Ga0115331_10149	Ga0115331_101	48255	49953	1698	1	Dynamin family protein	58482e9fea064b5890fae7ea	ATGACAGACAGTAAGAGTGCCGTGACGCCACCAGTGGGAGGGGCGCTGAGCGATATCGCGAAGCGAGTCTCAGAAACCCGCTTCACCCTGCAGACCGACGACTTCGCCGACGGTCGCGAACTGCACCGACAACTCTCCTCGGAGCTGACGGACTATCTGCTCCCGCGCATCAATCGGACGCAGACGCCCTTCATGATCGCGGTCGGTGGGTCAACTGGCGCAGGCAAGTCCACCTTGGTGAATTCCCTGGTCGGACGCACGGTGACTCCCGCGGGGGTGCGCCGTCCGACGACGGGCAACCCGATCGTGGTGCACAACCCTGCTGACACCAAATTCTTCGAATCGCAGTCCTTTCTCTCTGATCTGCCGCGCAGCACGGATCCGACGACGCAGACCCCC…
Brevibacterium linens 962_8	1	Ga0115331_10150	Ga0115331_101	49949	51530	1581	1	50S ribosome-binding GTPase	58482e9fea064b5890fae7ec	GTGAACGATCCTGCACAGTCCGAGATCAGGCGTCGAGCCGAAGGAATTCGGCAGACCCTGTCCCTGGGACCCGACAAATTGAGCGCCGAAGTTCGTACGGACGCGCAGAACCTGCTCAACCGTGCCGAGGATCGGCTCGGCCTGGGCGAGGAGTTCACCGTCGTGGCCTTCGCCGGCTCCACCGGTTCGGGAAAGTCCTCTCTGTTCAATGCCGTTGCCGGACTGGACATCGCCCGGGTCGGCGTTCGTCGGCCCACCACCTCCCGTCCCACTGCATGTGTGTGGGGCGAAGGCGGCAACGACATCCTCAATTGGCTCCATGTGCCCGAGCGCAGCAGGACCTGGCGCGAATCAGCGCTCGACGGTGATGATCAGCGCAAGCTGCACGGCCTGATTCTG…
Brevibacterium linens 962_8	1	Ga0115331_10151	Ga0115331_101	51738	52338	600	1	single-strand DNA-binding protein	58482e9fea064b5890fae7ee	ATGTCCATCATCCCGATCAACCTCAGCGGCACAGTGGCCGCCGATCCGCAGAGCCGCACCCTGCCGTCTGGCAGAGCCTGCGCCTCCTTTCGGTTGGCCGTCAACCATTGGCGCCTCGACAAAGGAACCGGAGAGTATCTCTCCGACACGACCTCGTGGTTCAGCGTCGACTGCTACGGGCCTCTGGCCAGCAACTGCTCGATGAGTCTGCACCAAGGTATGTCCGTCGTCGTACAGGGGACCCTGAAGATTCGGGAATGGTCGACTGATGAGAAGCGGGGAATCGCTCCCACCGTTGTTGCAGAACACATCGGTCCCGATCTTCGCTACGGCACCGCCAACTATCAGAAGTCCAGTAACCCGAATCGGCAAACCGAAGGTCAGCAGCAGACGGCTGCA…	K03111
Brevibacterium linens 962_8	1	Ga0115331_10152	Ga0115331_101	52481	53207	726	1	hypothetical protein	58482e9fea064b5890fae7f0	ATGCGTCTCGTTCCCCTCCTAGGTCTTGGAGCCCTGACCTTGGCTCTCTCGGGTTGTTCGCTGCTGGGATTGGGCGGAGATGATTCGTCGCCCACTCCGGCTCGCACCCCGGCGAAGCCGGTTGCAGAGGTCGACAAGGTCGTTTCCGCACTGAAACCTCTGACCGGCAACGAAGACACGGTTCCGTCGACGAAGAAATTCTTCACAACGATGATCGATGCCGGCTACGATCCGGAGCAGCTTGAGGCTACGATCGATGACTCCCCGCTGGGCAATGACGTGCCCTCGAAGATGTTCGGCGTCAAAACGGACAAAGGGTGCGTGATCGGTGAGATACGAAAGGGAAAGGCCACCGCAGAGCTGATGCCGCCCACCGAATCGACCGGGGCATGCCTGTTC…
Brevibacterium linens 962_8	1	Ga0115331_10153	Ga0115331_101	53273	54956	1683	1	ATP-binding cassette protein ChvD family	58482e9fea064b5890fae7f2	ATGGCCGAATTCATTTACACCCTTCACAAGGCGCGTAAAGCGCACGGCGACAAAGTCATCCTCGATGACGTGTCGATGTCCTTCTACCCCGGCGCGAAGATCGGCATGGTCGGTCCCAACGGTGCCGGTAAGTCTACGATCCTCAAGATCATGGCCGGGCTCGAGCAGCCGTCCAATGGCGAGGCTCGGCTCAGCCCCGGGTACACCGTGGGCATTCTCCTGCAGGAGCCGCCCCTGAACGAGGACAAGACCGTCCTCGGCAACGTCCAAGAGGGCGTCGGCGAGATCAAGGCAAAGCTGGACCGCTTCAACGCCATCTCCGAGGAGATGGCCAGCCCTGATGCCGACTTCGATGCCCTGATGGAAGAGATGGGCAAGCTGCAAGAAGCTATCGATGCC…
Brevibacterium linens 962_8	1	Ga0115331_10157	Ga0115331_101	56848	57523	675	1	hypothetical protein	58482e9fea064b5890fae7fa	ATGACTGAACTCGAGATCGCCGATCCGCTGGCGATGAAGGATCTGGCCGCGTTCACCTCCTTGGCACACCGGCTCGACCCTGACGGGGCTATGCGCTTGCATGTGTCATCGACCGTGCTCGTCGTCACCGTTGCGCCCCTGTATCCGCATGGCATCGGAGACTCCACACCGTTGGTCCTCGCGATGCGAATGCTGCGCCTGAGCGGACCGGAGATGGACGGCCTCGACGAGGTGGTTCCCCTGACCAACCTCAAGGACCGGTTCGCGCGCGCCGAAAATGCCACACGCCTGCCTGTGCCCCCGAACTCGGTGCTGGTGTCCTGGACCGGCATTGCCCCGCCGAAGGGACAGTGGGCTGTTCGCGACAGGATCTCCGGCAATGAGATTCGGTCCACCGCC…
Brevibacterium linens 962_8	1	Ga0115331_10159	Ga0115331_101	58005	59124	1119	-1	small conductance mechanosensitive channel	58482e9fea064b5890fae7fe	ATGACTTTCGATGCTTTGAATACCGACCTGTTGTCCGCACCCAAGATCGATTGGGACTTTCTCCTCGACGCTCCGTTGAGGATCCTCATCATCATCGTCATCGCCATCGTGCTCAACATGGTGATGCGGTACTTCATCCGACGCTTCTCCACTGCCGTGGCCAAAGGCACCGTCGGCAGTCAGAAGGCTGCGGAGAACGGCAAGTTCTCGGCCACGGTCATGGAATCGCAGCGGACGGGCATCGACCCGGCGACGATCCGCGAACGCCGTGCTCAGCGTGCGAAGACTGTCGGTCGGATGCTCTCGTCTGTGGCGACGATCCTCATCAGCGCCGTCGCAGTCCTCATGATCCTCGACCAGCTCAACTTCAACATCGCACCCATTCTGGCCTCGGCAGGT…	K03442
[truncated: 4,401 more rows]

## Sheet: Supplementary file 1e
group	species	genera	phyla	CDS	Genes/species (avg)	Mobile elements
1	33	6	2	755	22.8788	x
2	33	9	3	322	9.75758	x
3	21	13	3	237	11.2857	x
4	11	1	1	189	17.1818
5	11	1	1	151	13.7273
6	12	1	1	148	12.3333
7	9	3	1	137	15.2222	x
8	11	1	1	131	11.9091
9	11	1	1	104	9.45455
10	11	1	1	101	9.18182
11	11	1	1	77	7
12	7	1	1	76	10.8571	x
13	4	2	1	76	19
14	11	1	1	74	6.72727
15	11	1	1	72	6.54545
16	11	1	1	68	6.18182	x
[truncated: 245 more rows]

## Sheet: Supplementary file 1f
		Group 27
[truncated: 12 more rows]

[truncated: 3 more sheets: Supplementary file 1g, Supplementary file 1h, Supplementary file 1i]
